# Supplementary material for: Iodine radical mediated cascade [3 + 2] carbocyclization of ene-vinylidenecyclopropanes with thiols and selenols via photoredox catalysis
Source: Royal Society of Chemistry journal article supplement (doi:10.1039/d3qo01866k), 2024-01-01
Supplement: d3qo01866k1.pdf [file d3qo01866k1.pdf]

# Supporting Information

## Iodine radical mediated cascade [3 + 2] carbocyclization of enevinylidenecyclopropanes with thiols and selenols via photoredox catalysis

Zhe Meng,<sup>[a]</sup> Min Shi<sup>\*[a,b]</sup> and Yin Wei<sup>\*[b]</sup>

<sup>a</sup> Key Laboratory for Advanced Materials and Institute of Fine Chemicals, Key Laboratory for Advanced Materials and Feringa Nobel Prize Scientist Joint Research Center, School of Chemistry & Molecular Engineering, East China University of Science and Technology, Meilong Road No.130, Shanghai, 200237 (China), <sup>b</sup> State Key Laboratory of Organometallic Chemistry, Center for Excellence in Molecular Synthesis, University of Chinese Academy of Sciences, Shanghai Institute of Organic Chemistry, Chinese Academy of Sciences, 345 Lingling Road, Shanghai 200032, P. R. China. weiyin@sioc.ac.cn, mshi@mail.sioc.ac.cn

### Table of Contents

|     |                                                                                                          |      |
|-----|----------------------------------------------------------------------------------------------------------|------|
| 1.  | General remarks.....                                                                                     | S2   |
| 2.  | General procedures for the synthesis of substrates <b>1</b> , <b>2g</b> , and <i>d</i> - <b>2a</b> ..... | S3   |
| 3.  | Optimization of reaction conditions .....                                                                | S9   |
| 4.  | General procedure for the synthesis of <b>3</b> and <b>4</b> .....                                       | S13  |
| 5.  | Mechanistic studies.....                                                                                 | S15  |
| 6.  | Gram scale reaction .....                                                                                | S25  |
| 7.  | Transformation of product <b>3aa</b> .....                                                               | S26  |
| 8.  | Spectroscopic data of substrates <b>1</b> .....                                                          | S27  |
| 9.  | Spectroscopic data of products <b>3</b> , <b>4</b> , <b>5</b> , <b>6</b> and <b>7</b> . .....            | S63  |
| 10. | Computational studies .....                                                                              | S130 |
| 11. | X-Ray structures .....                                                                                   | S149 |
| 12. | References.....                                                                                          | S151 |

## 1. General remarks

$^1\text{H}$ ,  $^{13}\text{C}$  and  $^{19}\text{F}$  NMR spectra were recorded at 400 MHz or 600 MHz, 100 MHz or 150 MHz and 376 MHz or 564 MHz, respectively. HRMS spectra were recorded by EI, ESI, FI method. Infrared spectra were recorded on a Perkin-Elmer PE-983 spectrometer with absorption in  $\text{cm}^{-1}$ . Mass spectra were recorded by EI, ESI, and HRMS was measured on an Agilent Technologies 6224 TOF LC/MS instrument and a Waters Micromass GCT Premier. Melting points were determined on a digital melting point apparatus and temperatures were uncorrected. X-ray structure was determined on a Bruker Smart-1000 X-ray Diffraction meter. The employed solvents were dried up by standard methods when necessary. Commercially obtained reagents were used without further purification. All reactions were monitored by TLC plate analysis with silica gel coated plates (Huanghai GF254). Flash column chromatography was performed by using 300-400 mesh silica gel eluting with ethyl acetate and petroleum ether at increased pressure. Substrate **1u** is easily deteriorated in air and its  $^1\text{H}$ ,  $^{13}\text{C}$  NMR spectra can not be measured.

## 2. General procedures for the synthesis of substrates 1, 2g, and d-2a

### Synthesis of substrates 1a-1t<sup>[1]</sup>

#### Step 1

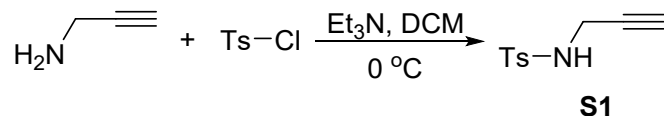

To a solution of *p*-toluenesulfonyl chloride (60 mmol) in DCM (100 mL) was added Et<sub>3</sub>N (90 mmol) and 2-propargylamine (90 mmol) at 0 °C and the resulting solution was allowed to stir at 0 °C for 12 h. Extracted with H<sub>2</sub>O (20 mL × 3), dried over anhydrous Na<sub>2</sub>SO<sub>4</sub>, and filtered, the organic phase was concentrated under reduced pressure to dryness to give a yellow solid **S1**.

#### Step 2

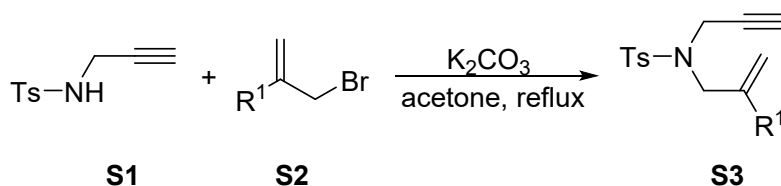

To a solution of **S1** (50 mmol) in acetone (100 mL) was added K<sub>2</sub>CO<sub>3</sub> (1.5 equiv.) and **S2** (2.0 equiv.). The resulting solution was allowed to stir at 70 °C for 12 h. After filtration, the organic phase was concentrated under reduced pressure and the residue was purified by a flash column chromatography on silica gel to give the desired products **S3** (PE:EA = 10:1).

#### Step 3

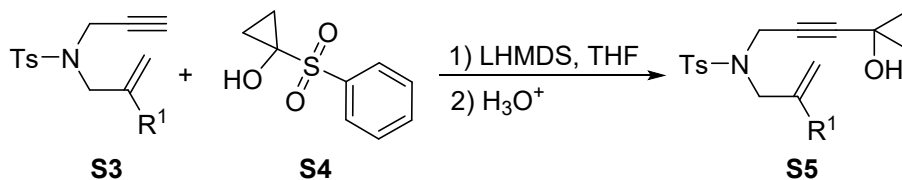

To a solution of compounds **S3** (20 mmol) in THF (30 mL) was slowly added LHMDS (24 mmol, 1.0 M in THF) at -78 °C under the protection of argon and the resulting solution was allowed to stir at -78 °C for 30 min before a solution of **S4** (10 mmol) in THF (10 mL) was added into the above mixture. Consequently, the reaction mixture was allowed to warm up to room temperature and the mixture was left standing overnight. Then, saturated NH<sub>4</sub>Cl solution was added to quench the

reaction. Extracted with ethyl acetate, dried over anhydrous  $\text{Na}_2\text{SO}_4$ , and filtered, the organic phase was concentrated under reduce pressure and the residue was purified by a flash column chromatography on silica gel to give the desired products **S5** (PE:EA = 4:1~2:1).

#### Step 4

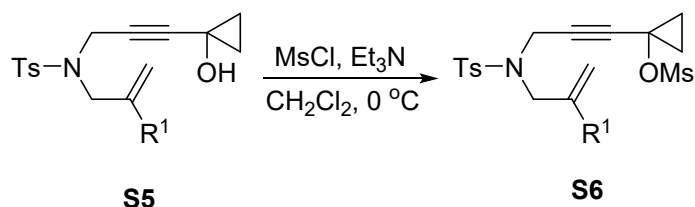

To a solution of **S5** (5.0 mmol) and anhydrous  $\text{Et}_3\text{N}$  (2.0 equiv.) in  $\text{CH}_2\text{Cl}_2$  (20 mL) was added  $\text{MsCl}$  (2.0 equiv.) at  $0\text{ }^\circ\text{C}$  under the protection of argon and the resulting solution was allowed to stir at  $0\text{ }^\circ\text{C}$  for 1.0 h before some amounts of water were added to quench the reaction. Extracted with  $\text{CH}_2\text{Cl}_2$  (20 mL  $\times$  3), dried over anhydrous  $\text{Na}_2\text{SO}_4$ , and filtered, the organic phase was concentrated under reduce pressure and the residue purified by a flash column chromatography on silica gel to give the desired products **S6** (PE:EA = 2:1).

#### Step 5

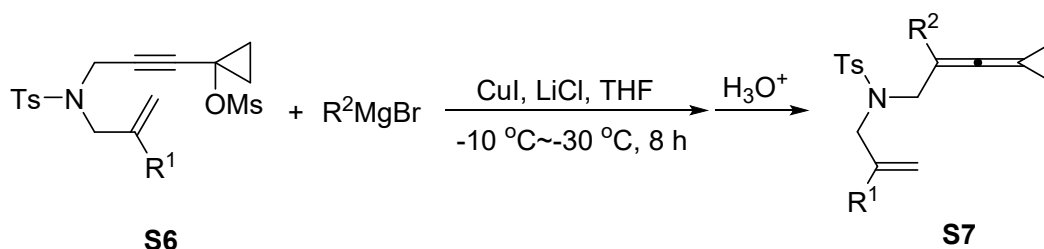

To a flame dried 50 mL three-neck flask was added anhydrous  $\text{CuI}$  (8.8 mmol),  $\text{LiCl}$  (8.8 mmol) and the solvent THF (20 mL) under the protection of argon and then, the flask was cooled to  $-10\text{ }^\circ\text{C}$  before the solution of  $\text{RMgBr}$  or  $\text{RMgCl}$  (2.0 M, 4.0 mL) was added dropwise into the flask under argon. After 5 minutes, the flask was moved into a  $-30\text{ }^\circ\text{C}$ ~ $-40\text{ }^\circ\text{C}$  bath and the reaction mixture was stirred for a while before a solution of **S6** (4.0 mmol) in THF (10 mL) was added dropwise into the above flask. The resulting solution was allowed to stir at  $-40\text{ }^\circ\text{C}$  for 8 h before saturated  $\text{NH}_4\text{Cl}$  solution was added to quench the reaction. Extracted with EA (20 mL  $\times$  3), dried over anhydrous  $\text{Na}_2\text{SO}_4$ , and filtered, the organic phase was concentrated under reduce pressure and the residue was

purified by a flash column chromatography on silica gel to give the desired products **S7** (PE:EA = 10:1).

### Synthesis of substrate **1u**

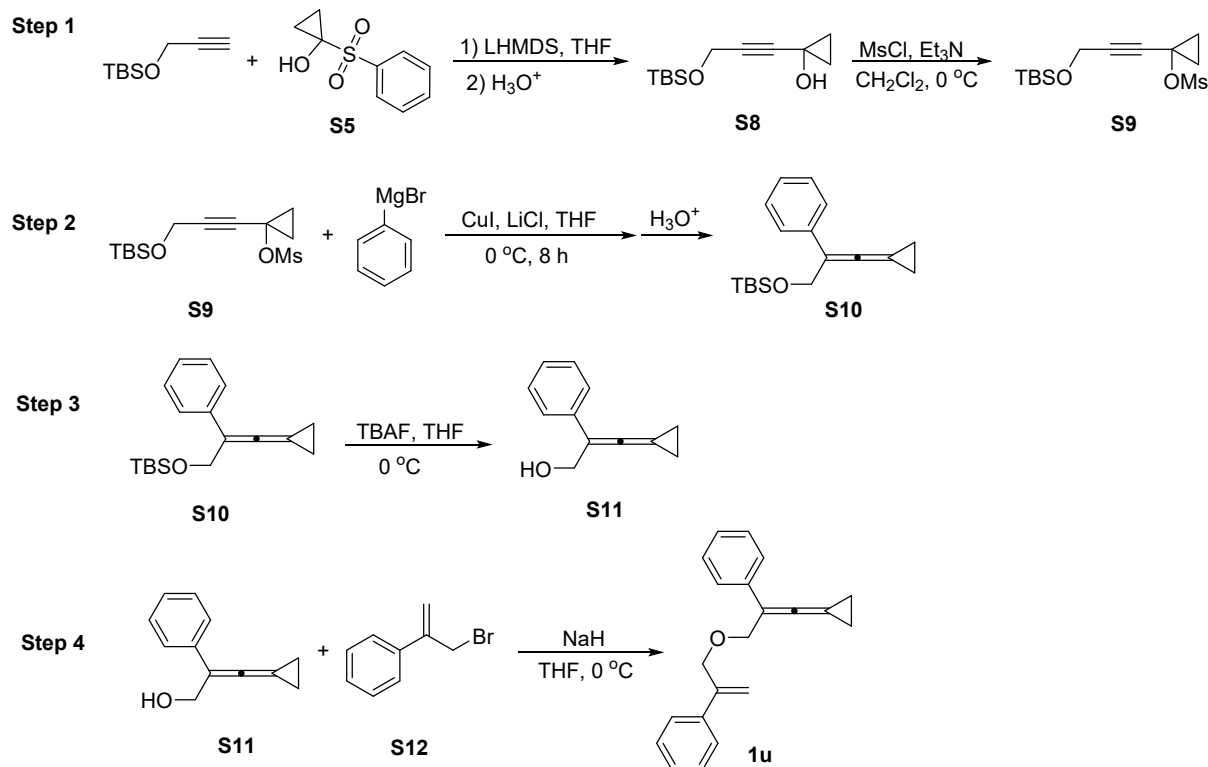

The experimental procedures of **step 1** and **step 2** were the same as those described above.

**Step 3:** To a flame dried 50 mL flask was added **S10** (2.0 mmol), and the solvent THF (10 mL) under the protection of argon and then, the flask was cooled to 0 °C before the solution of TBAF (1.0 M, 4.0 mL) was added dropwise into the flask under argon. The resulting solution was allowed to stir at 0 °C for 8.0 h before water was added to quench the reaction. Extracted with EA, dried over anhydrous Na<sub>2</sub>SO<sub>4</sub>, and filtered, the organic phase was concentrated under reduce pressure and the residue was purified by a flash column chromatography on silica gel to give the desired product **S11** (PE:EA = 4:1).

**Step 4:** To a flame dried 50 mL flask was added NaH (60% dispersion in mineral oil, 3.0 mmol, 2.0 equiv.), and the solvent THF (10 mL) under the protection of argon and then, the flask was cooled to 0 °C before the solution of **S11** (1.5 mmol) in THF was added dropwise into the flask under argon. The reaction mixture was stirred at 0 °C for 30 min. The **S12** (3.0 mmol, 2.0 equiv.) was

added slowly and the reaction mixture was warmed to room temperature overnight before water was added to quench the reaction. Extracted with EA, dried over anhydrous  $\text{Na}_2\text{SO}_4$ , and filtered, the organic phase was concentrated under reduce pressure and the residue was purified by a flash column chromatography on silica gel to give the desired product **1u** (PE:EA = 50:1).

### Synthesis of substrate **1v**.<sup>[2]</sup>

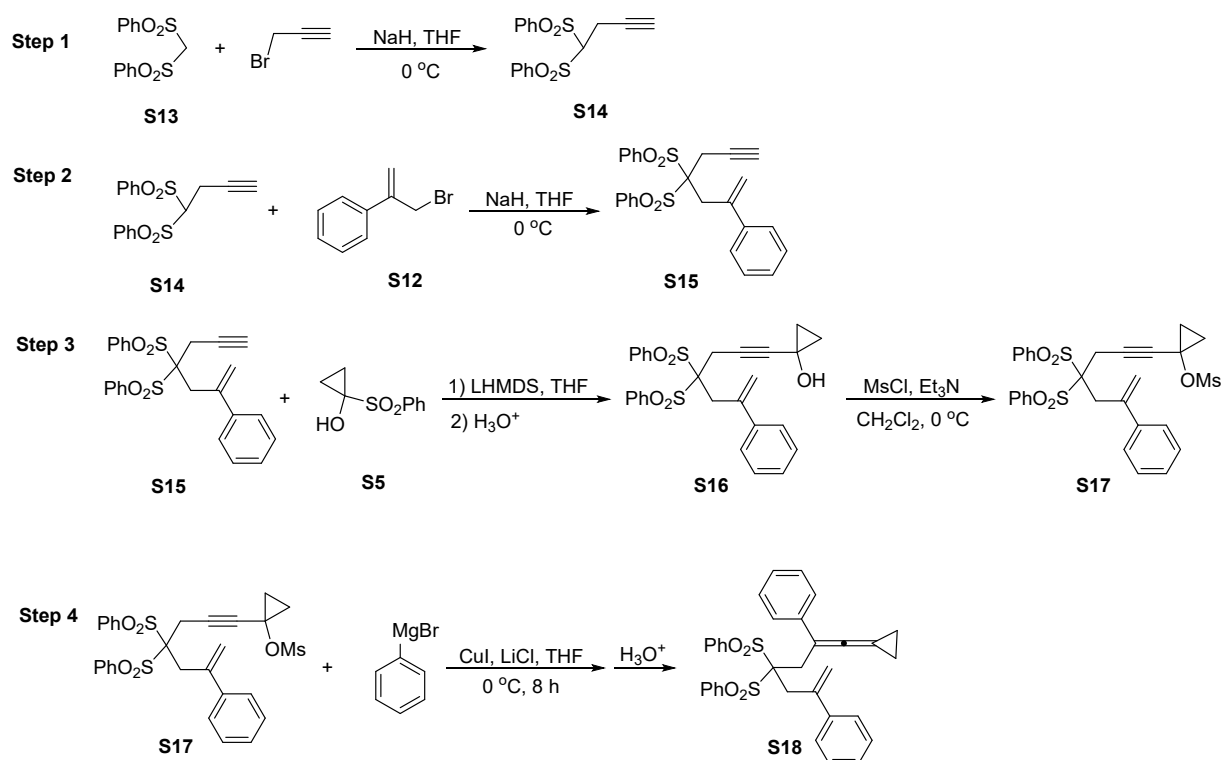

The experimental procedures of **step 3** and **step 4** were the same as those described above.

**Step 1:** To a flame dried 100 mL flask was added NaH (60% dispersion in mineral oil, 10.0 mmol, 2.0 equiv.), and the solvent THF (30 mL) under the protection of argon and then, the flask was cooled to 0 °C before the solution of **S13** (5.0 mmol) in THF was added dropwise into the flask under argon. The reaction mixture was stirred at 0 °C for 30 min. The propargyl bromide (10.0 mmol, 2.0 equiv.) was added slowly and the reaction mixture was warmed to room temperature overnight before water was added to quench the reaction. Extracted with EA, dried over anhydrous  $\text{Na}_2\text{SO}_4$ , and filtered, the organic phase was concentrated under reduce pressure and the residue was purified by a flash column chromatography on silica gel to give the desired product **S14** (PE:EA = 4:1).

**Step 2:** To a flame dried 100 mL flask was added NaH (60% dispersion in mineral oil, 8.0 mmol, 2.0 equiv.), and the solvent THF (30 mL) under the protection of argon and then, the flask was cooled to 0 °C before the solution of **S14** (4.0 mmol) in THF was added dropwise into the flask under argon. The reaction mixture was stirred at 0 °C for 30 min. The propargyl bromide (8.0 mmol, 2.0 equiv.) was added slowly and the reaction mixture was warmed to room temperature overnight before water was added to quench the reaction. Extracted with EA, dried over anhydrous Na<sub>2</sub>SO<sub>4</sub>, and filtered, the organic phase was concentrated under reduce pressure and the residue was purified by a flash column chromatography on silica gel to give the desired product **S15** (PE:EA = 4:1).

### Synthesis of substrate **2g**.<sup>[3]</sup>

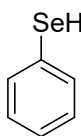

Compound **2g** was synthesized according to the previously reported literature procedure.<sup>[3]</sup> Diselenide (5.0 mmol) and NaBH<sub>4</sub> (3.0 equiv.) were added in a 50 mL flask. The flask was placed under vacuum and backfilled with argon three times. Then, EtOH (10.0 mL) and was added in the flask via a syringe. Next, the mixture was allowed to stir at 0 °C. After 15 min, citric acid (5.0 equiv.) was added and the reaction mixture was stirred at 0 °C for 5 minutes before water was added to quench the reaction. Extracted with Et<sub>2</sub>O and the organic phase was washed with saturated NH<sub>4</sub>Cl (10 mL, aq.) and brine (10 mL), dried over anhydrous Na<sub>2</sub>SO<sub>4</sub>, filtered and concentrated under vacuum to afford the desired product **2g**, which is pure enough to be used without further purification.

### Synthesis of *d*-**2a**.<sup>[4]</sup>

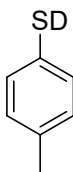

Compound *d*-**2a** was synthesized according to the previously reported literature procedure.<sup>[4]</sup> **2a** (4.0 mmol) was added in a flame dried 15 mL Schlenk tube. The reaction tube was placed under

vacuum and backfilled with argon three times. Then,  $\text{CDCl}_3$  (10.0 mL) and  $\text{D}_2\text{O}$  (10 equiv.) were added in the Schlenk tube via a syringe. Next, the resulting mixture was allowed to stir at 70 °C for 12 h. When the reaction is complete, the reaction mixture was allowed to cool down to room temperature and dried over anhydrous  $\text{Na}_2\text{SO}_4$ . The solvent was removed under reduce pressure to afford the desired compound *d*-**2a** as a yellow solid.



### 3. Optimization of reaction conditions

**Table S1.** Optimization of reaction conditions using **1a** as a template substrate (time).<sup>a</sup>

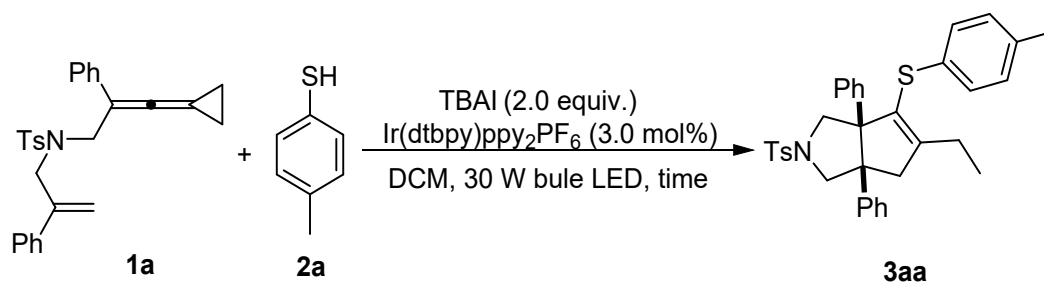

| entry <sup>a</sup> | time | <b>3aa</b> , yield <sup>b</sup> [%] |
|--------------------|------|-------------------------------------|
| 1                  | 12 h | 47                                  |
| 2                  | 24 h | 45                                  |
| 3                  | 48 h | 41                                  |

<sup>a</sup> Reaction was carried out with **1a** (0.1 mmol), **2a** (2.0 equiv.), TBAI (2.0 equiv.), Ir(dtbbpy)ppy<sub>2</sub>PF<sub>6</sub> (3.0 mol%) in DCM (2.0 mL) at ambient temperature using 30 W blue LEDs irradiation. <sup>b</sup> <sup>1</sup>H NMR yield using dimethyl terephthalate as an internal standard.

**Table S2.** Optimization of reaction conditions using **1a** as a template substrate (solvent).<sup>a</sup>

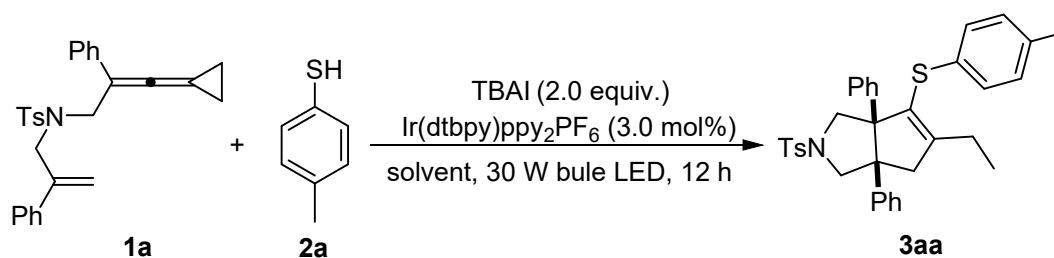

| entry <sup>a</sup> | solvent            | <b>3aa</b> , yield <sup>b</sup> [%] |
|--------------------|--------------------|-------------------------------------|
| 1                  | DCM                | 47                                  |
| 2                  | CH <sub>3</sub> CN | 61                                  |
| 3                  | DMA                | NR                                  |
| 4                  | DCE                | 39                                  |
| 5                  | DMF                | NR                                  |
| 6                  | ethyl acetate      | 33                                  |
| 7                  | CHCl <sub>3</sub>  | 44                                  |
| 8                  | acetone            | 51                                  |
| 9                  | toulene            | NR                                  |

<sup>a</sup> Reaction was carried out with **1a** (0.1 mmol), **2a** (2.0 equiv.), TBAI (2.0 equiv.), Ir(dtbbpy)ppy<sub>2</sub>PF<sub>6</sub> (3.0 mol%) in solvent (2.0 mL) at ambient temperature using 30 W blue LEDs irradiation for 12 hours. <sup>b</sup> <sup>1</sup>H NMR yield using dimethyl terephthalate as an internal standard.

**Table S3.** Optimization of reaction conditions using **1a** as a template substrate (additive).<sup>a</sup>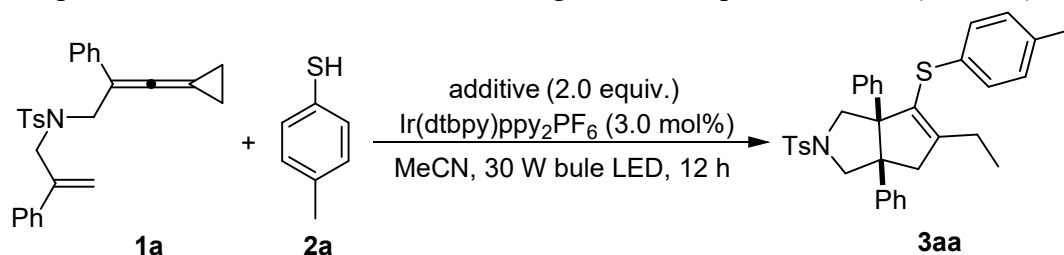

| entry <sup>a</sup> | additive               | <b>3aa</b> , yield <sup>b</sup> [%] |
|--------------------|------------------------|-------------------------------------|
| 1                  | TBAI                   | 61                                  |
| 2                  | KI                     | 53                                  |
| 3                  | NaI                    | 42                                  |
| 4                  | TBAB                   | 58                                  |
| 5                  | N(Me) <sub>4</sub> I   | 53                                  |
| 6                  | N(Me) <sub>3</sub> BnI | 59                                  |
| 7                  | N(Et) <sub>4</sub> I   | 55                                  |
| 8                  | S(Me) <sub>3</sub> I   | NR                                  |

<sup>a</sup> Reaction was carried out with **1a** (0.1 mmol), **2a** (2.0 equiv.), additive (2.0 equiv.), Ir(dtbpy)ppy<sub>2</sub>PF<sub>6</sub> (3.0 mol%) in MeCN (2.0 mL) at ambient temperature using 30 W blue LEDs irradiation for 12 hours. <sup>b</sup> <sup>1</sup>H NMR yield using dimethyl terephthalate as an internal standard.

**Table S4.** Optimization of reaction conditions using **1a** as a template substrate (equiv. of TBAI).<sup>a</sup>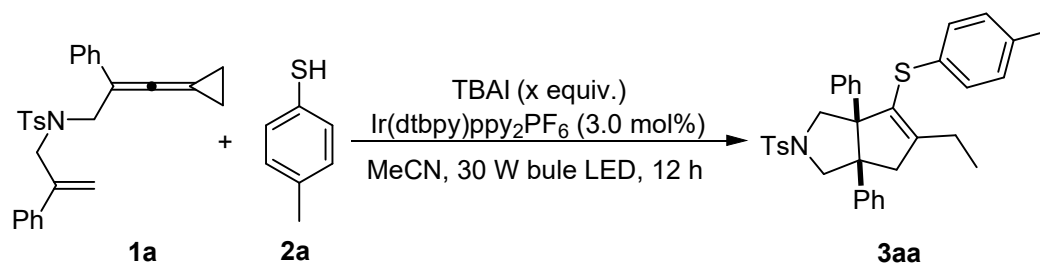

| entry <sup>a</sup> | x   | <b>3aa</b> , yield <sup>b</sup> [%] |
|--------------------|-----|-------------------------------------|
| 1                  | 1.0 | 53                                  |
| 2                  | 2.0 | 61                                  |
| 3                  | 0.5 | 49                                  |
| 4                  | 0.2 | 50                                  |

<sup>a</sup> Reaction was carried out with **1a** (0.1 mmol), **2a** (2.0 equiv.), TBAI (x equiv.), Ir(dtbpy)ppy<sub>2</sub>PF<sub>6</sub> (3.0 mol%) in MeCN (2.0 mL) at ambient temperature using 30 W blue LEDs irradiation for 12 hours. <sup>b</sup> <sup>1</sup>H NMR yield using dimethyl terephthalate as an internal standard.

**Table S5.** Optimization of reaction conditions using **1a** as a template substrate (equiv. of **2a**).<sup>a</sup>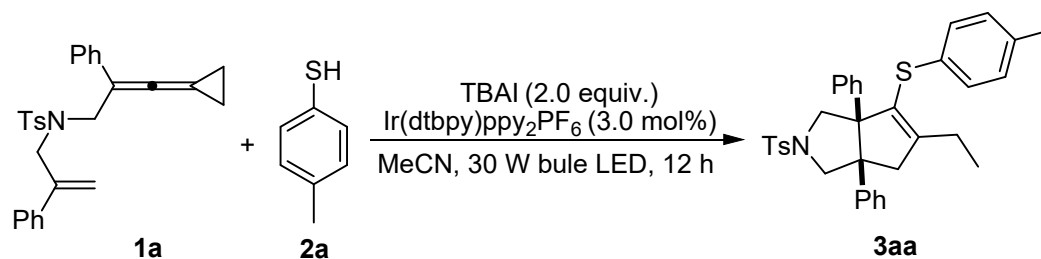

| entry <sup>a</sup> | x   | <b>3aa</b> , yield <sup>b</sup> [%] |
|--------------------|-----|-------------------------------------|
| 1                  | 1.0 | 46                                  |
| 2                  | 2.0 | 61                                  |
| 3                  | 3.0 | 53                                  |
| 4                  | 4.0 | 57                                  |
| 5                  | 5.0 | 54                                  |

<sup>a</sup> Reaction was carried out with **1a** (0.1 mmol), **2a** (x equiv.), TBAI (2.0 equiv.), Ir(dtbbpy)ppy<sub>2</sub>PF<sub>6</sub> (3.0 mol%) in MeCN (2.0 mL) at ambient temperature using 30 W blue LEDs irradiation for 12 hours. <sup>b</sup> <sup>1</sup>H NMR yield using dimethyl terephthalate as an internal standard.

**Table S6.** Optimization of reaction conditions using **1a** as a template substrate (conc.).<sup>a</sup>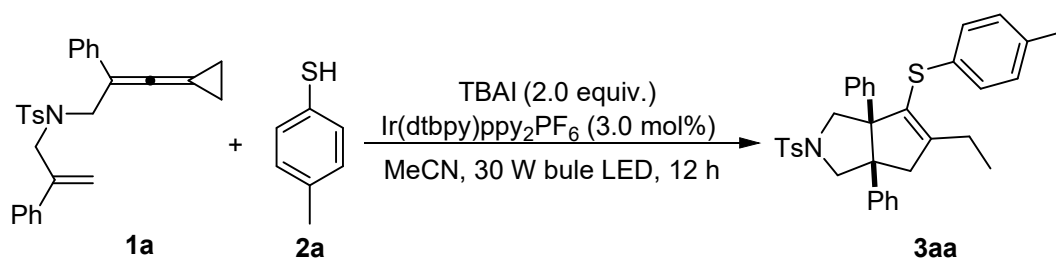

| entry <sup>a</sup> | x    | <b>3aa</b> , yield <sup>b</sup> [%] |
|--------------------|------|-------------------------------------|
| 1                  | 0.5  | 61                                  |
| 2                  | 2.0  | 60                                  |
| 3                  | 5.0  | 65                                  |
| 4                  | 10.0 | 78                                  |

<sup>a</sup> Reaction was carried out with **1a** (0.1 mmol), **2a** (2.0 equiv.), TBAI (2.0 equiv.), Ir(dtbbpy)ppy<sub>2</sub>PF<sub>6</sub> (3.0 mol%) in MeCN (x mL) at ambient temperature using 30 W blue LEDs irradiation for 12 hours. <sup>b</sup> <sup>1</sup>H NMR yield using dimethyl terephthalate as an internal standard.

**Table S7.** Optimization of reaction conditions using **1a** as a template substrate (photocatalyst).<sup>a</sup>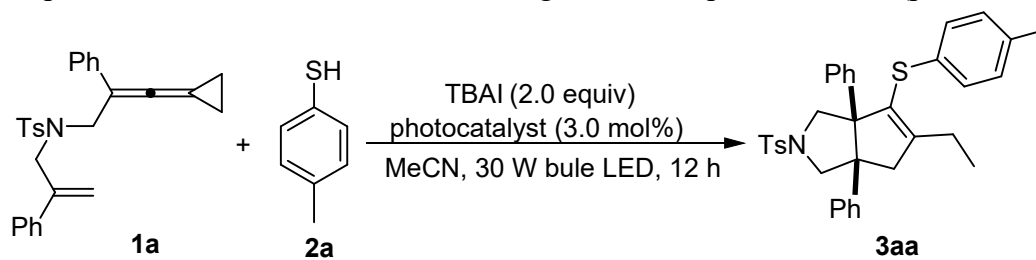

| entry <sup>a</sup> | photocatalyst                                                                | <b>3aa</b> , yield <sup>b</sup> [%] |
|--------------------|------------------------------------------------------------------------------|-------------------------------------|
| 1                  | Ir(dtbpv)ppy <sub>2</sub> PF <sub>6</sub>                                    | 78                                  |
| 2                  | [Ir(dFCF <sub>3</sub> ppy) <sub>2</sub> dtbpv]PF <sub>6</sub>                | 62                                  |
| 3                  | <i>fac</i> -Ir(ppy) <sub>3</sub> PF <sub>6</sub>                             | 55                                  |
| 4                  | 4CzIPN                                                                       | 64                                  |
| 5                  | [Ir(dFCF <sub>3</sub> ppy) <sub>2</sub> dCF <sub>3</sub> bpy]PF <sub>6</sub> | 66                                  |
| 6                  | Ru(bpy) <sub>3</sub> PF <sub>6</sub>                                         | 35                                  |
| 7                  | Ir(dtbpv)ppy <sub>2</sub> PF <sub>6</sub>                                    | 50 <sup>c</sup>                     |
| 8                  | MesAcr <sup>+</sup>                                                          | NR                                  |

<sup>a</sup> Reaction was carried out with **1a** (0.1 mmol), **2a** (2.0 equiv.), TBAI (2.0 equiv.), photocatalyst (3.0 mol%) in MeCN (10.0 mL) at ambient temperature using 30 W blue LEDs irradiation for 12 hours. <sup>b</sup> <sup>1</sup>H NMR yield using dimethyl terephthalate as an internal standard. <sup>c</sup> TBAI (0.2 equiv.)

#### 4. General procedure for the synthesis of 3, 4 and 7

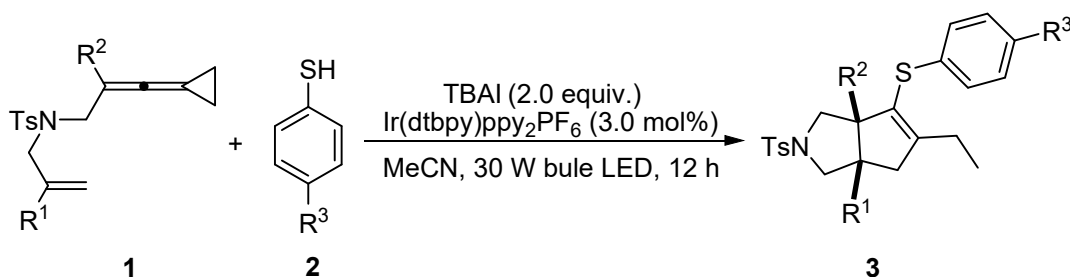

VDCPs **1** (0.1 mmol, 1.0 equiv.), TBAI (2.0 equiv.), **2** (2.0 equiv.), and Ir(dtbbpy)ppy<sub>2</sub>PF<sub>6</sub> (3.0 mol%) were added in a flame dried 15 mL Schlenk tube. The reaction tube was placed under vacuum and backfilled with argon three times. Then, MeCN (10 mL) was added in the Schlenk tube via a syringe. Next, the tube was placed 5.0 cm away from blue LEDs (30 W), and stirred vigorously under the irradiation of blue light for 12 h. After completion, the solvent was removed under reduced pressure. The crude product residue was purified by a column chromatography on silica gel (PE/EA = 10/1 to 4/1) to afford the purified product **3**.

#### General procedure for the synthesis of 4

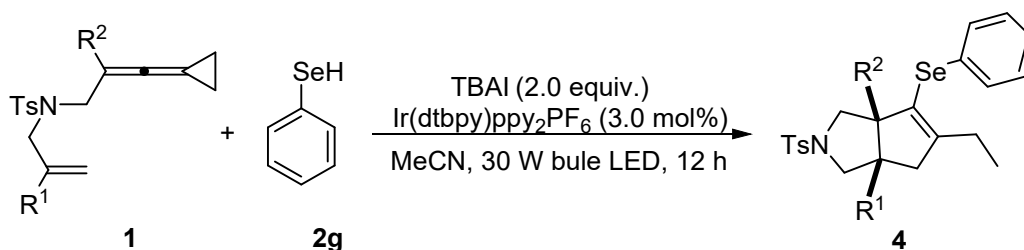

VDCPs **1** (0.1 mmol, 1.0 equiv.), TBAI (2.0 equiv.), **2g** (2.0 equiv.), and Ir(dtbbpy)ppy<sub>2</sub>PF<sub>6</sub> (3.0 mol%) were added in a flame dried 15 mL Schlenk tube. The reaction tube was placed under vacuum and backfilled with argon three times. Then, MeCN (10 mL) was added in the Schlenk tube via a syringe. Next, the tube was placed 5.0 cm away from blue LEDs (30 W), and stirred vigorously under the irradiation of blue light for 12 h. After completion, the solvent was removed under reduced pressure. The crude product residue was purified by a column chromatography on silica gel (PE/EA = 10/1 to 4/1) to afford the purified product **4**.

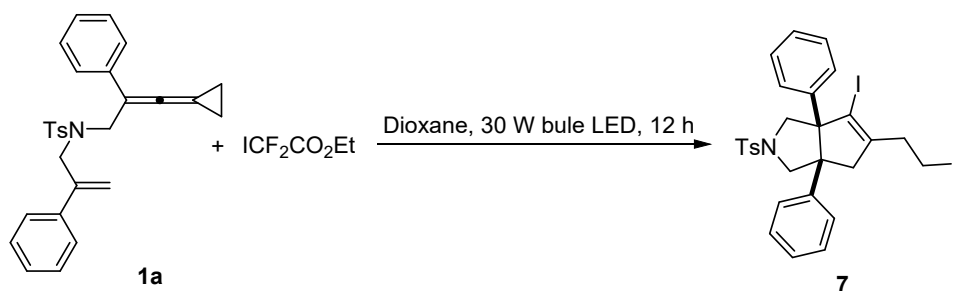

VDCP **1a** (0.1 mmol, 1.0 equiv) was added in an flame dried 15 mL Schlenk tube. The reaction tube was placed under vacuum and backfilled with argon three times. Then,  $\text{ICF}_2\text{CO}_2\text{Et}$  (0.24 mmol, 2.4 equiv.) and dioxane (10 mL) were added in the Schlenk tube via a syringe. Next, the tube was placed 5.0 cm away from blue LEDs (30 W), and stirred vigorously under the irradiation of blue light for 12 h. After completion, the solvent was removed under reduced pressure. The crude product residue was purified by a column chromatography on silica gel (PE/EA = 10/1 to 4/1) to afford the purified product **7**.

## 5. Mechanistic studies

### (a) Luminescence quenching experiments (Stern-Volmer Studies).<sup>[5]</sup>

Emission intensities were recorded using Varian Cary Eclipse spectrometer for all experiments. All Ir(dtbpv)ppy<sub>2</sub>PF<sub>6</sub> solutions were excited at 365 nm and the emission intensity was collected at 580 nm. Solutions of different concentration of TBAI and **2a** were prepared and introduced to a 1.0 cm path length quartz cuvette equipped with a Teflon® septum. In a typical experiment, to a 0.1 mM solution of photocatalyst in MeCN was added the appropriate amount of TBAI in a screw-top quartz cuvette under Ar atmosphere and the emission of the sample was collected. Subsequently, to a 0.1 mM solution of photocatalyst in MeCN was added the appropriate amount of **2a** in screw-top quartz cuvette under Ar atmosphere and the emission of the sample was collected.

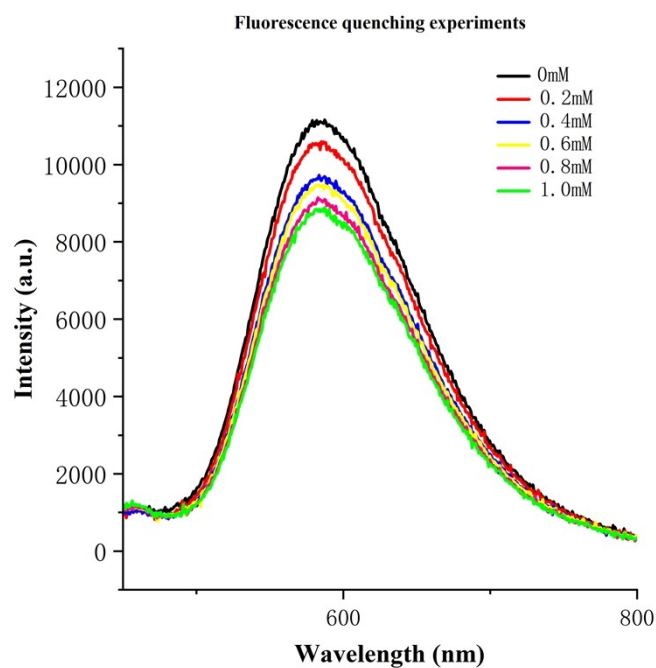

**Figure S1.** Quenching of the Ir(dtbpv)ppy<sub>2</sub>PF<sub>6</sub> emission (0.1 mM in MeCN) in the presence of increasing amounts of TBAI.

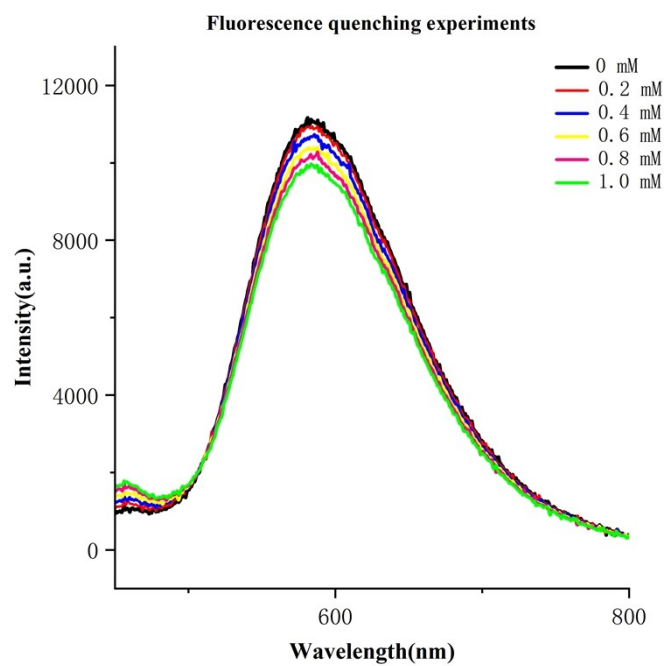

**Figure S2.** Quenching of the Ir(dtbpyp)ppy<sub>2</sub>PF<sub>6</sub> emission (0.1 mM in MeCN) in the presence of increasing amounts of **2a**.

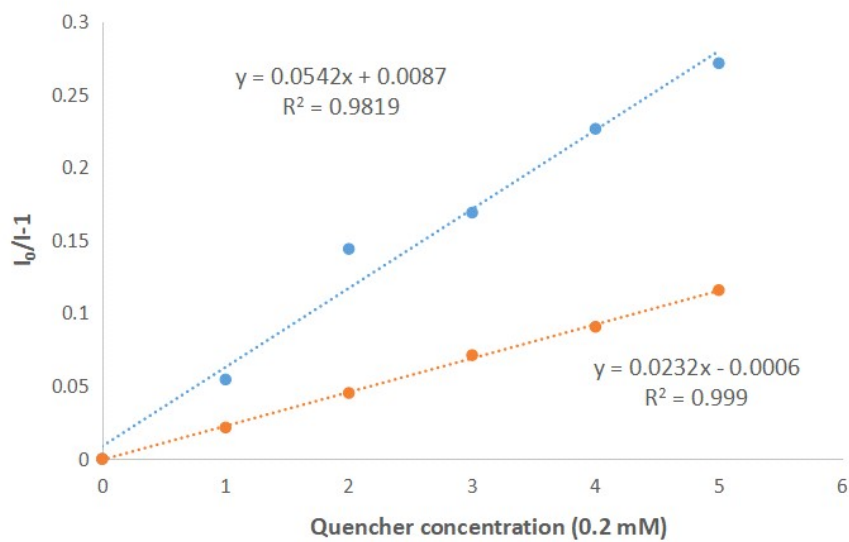

**Figure S3.** Stern-Volmer plot for the quenching studies above.



**(b) Light on/off experiment and quantum yield.**<sup>[5]</sup>

To study the necessity of continuous irradiation with visible light for the progress of the reaction, the reaction proceeding was monitored by <sup>1</sup>H NMR spectroscopy using dimethyl terephthalate as an internal standard before and after light irradiation and dark periods.

The control experiments shown below with successive intervals of irradiation and dark periods did result in interruption of the reaction progress in the absence of light, demonstrating that light is a necessary component for the reaction after triggering the reaction in the first part.

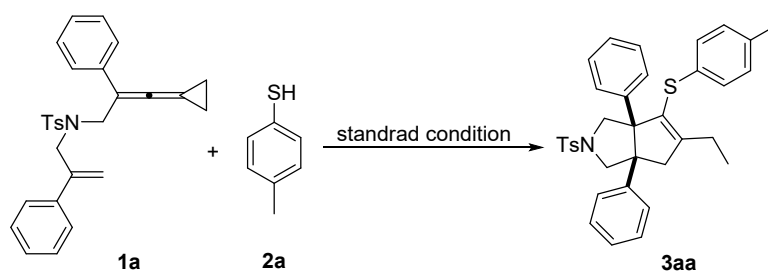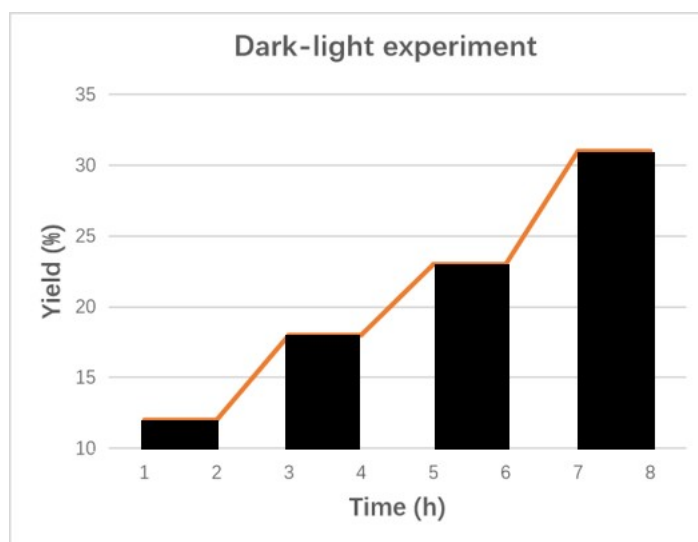

**Figure S4.** Light on-off experiment.

To further investigate whether the chain process is involved upon light irradiation, we measured the quantum yield of the template reaction of 1 h.

$$\phi = \frac{n_x}{n_p} = \frac{n_x}{\frac{\Delta E \times S \times t}{N_A h \nu}} = \frac{n_x \times N_A \times h \times c}{\Delta E \times S \times t \times \lambda}$$

$$= \frac{0.04 \times 15\% \times 10^{-3} \text{ mol} \times 6.022 \times 10^{23} \times 6.626 \times 10^{-34} \text{ J}\cdot\text{s} \times 2.998 \times 10^8 \text{ m}\cdot\text{s}^{-1}}{(260 \times 10^{-3} \text{ W}\cdot\text{cm}^{-2} \times 2 \text{ cm}^2) \times 3600 \text{ s} \times 455 \times 10^{-9} \text{ m}}$$

$$= 0.005$$

$n_x$  is the amount of photochemical or photophysical events  $x$  occurred during irradiation,  $n_p$  is the number of photons absorbed by the reactant.  $E$  is the radiant power.  $S$  is the irradiated area: 2 cm<sup>2</sup>;  $t$  is the irradiated time: 3600 s;  $N_A$  is the Avogadro constant: 6.022×10<sup>23</sup>/mol;  $h$  is the Planck constant: 6.626×10<sup>-34</sup> J·s;  $\nu$  is the frequency of incident light;  $c$  is velocity of light 2.998×10<sup>8</sup> m/s).  $\lambda$  is the wavelength: 455 nm;  $n_x$  was analyzed by <sup>1</sup>H NMR,  $\Delta E$  was measured by ILT1400 Portable Radiometer/Photometer.

VDCP **1a** (0.04 mmol, 1.0 equiv.), TBAI (2.0 equiv.), **2a** (2.0 equiv.), and Ir(dtbpyp)ppy<sub>2</sub>PF<sub>6</sub> (3.0 mol%) were added in a cuvette equipped with a magnetic stir bar. The reaction cuvette was placed under vacuum and backfilled with argon three times. Then, MeCN (10 mL) was added in the Schlenk tube via a syringe. Next, the tube was placed 5.0 cm away from blue LEDs (30 W), and stirred vigorously under the irradiation of blue light for 1.0 h. The reaction mixture was concentrated in *vacuo* and analyzed by <sup>1</sup>H NMR spectrum using dimethyl terephthalate as an internal standard. The quantum yield is calculated to be 0.005.

**(c) Radical trapping experiments.**<sup>[6]</sup>

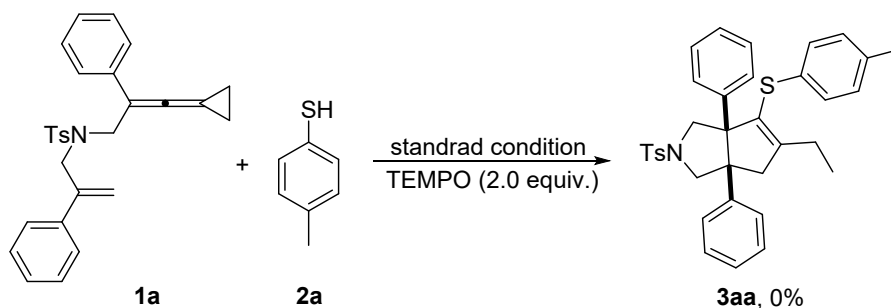

VDCP **1a** (0.1 mmol, 1.0 equiv.), TBAI (2.0 equiv.), **2a** (2.0 equiv.), TEMPO (2.0 equiv.) and Ir(dtbpyp)ppy<sub>2</sub>PF<sub>6</sub> (3.0 mol%) were added in a flame dried 15 mL Schlenk tube. The reaction tube was placed under vacuum and backfilled with argon three times. Then, MeCN (10.0 mL) was added in the Schlenk tube via a syringe. Next, the tube was placed 5.0 cm away from blue LEDs (30 W), and stirred vigorously under the irradiation of blue light for 12 h. When the reaction finished up, the mixture was concentrated in vacuo. The yield of product **3aa** was determined by <sup>1</sup>H NMR spectroscopy using dimethyl terephthalate as an internal standard.

**(d) Deuterium labeling experiments.**<sup>[7]</sup>

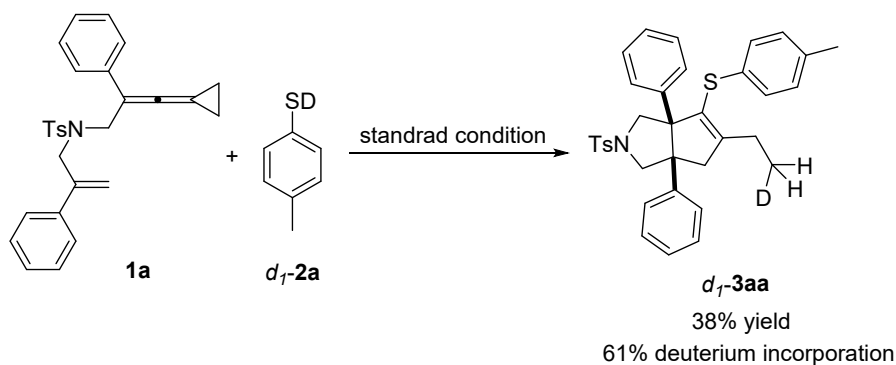

VDCP **1a** (0.1 mmol, 1.0 equiv.), TBAI (2.0 equiv.), **d<sub>1</sub>-2a** (2.0 equiv.), and Ir(dtbpyp)ppy<sub>2</sub>PF<sub>6</sub> (3.0 mol%) were added in a flame dried 15 mL Schlenk tube. The reaction tube was placed under vacuum and backfilled with argon three times. Then, MeCN (10.0 mL) was added in the Schlenk tube via a syringe. Next, the tube was placed 5.0 cm away from blue LEDs (30 W), and stirred vigorously under the irradiation of blue light for 12 h. When the reaction finished up, the mixture was concentrated in vacuo. The crude product was directly purified by a flash chromatography on

silica gel (petroleum ether:ethyl acetate = 10:1) to give the desired product in 38% yield with 62% deuterium incorporation.

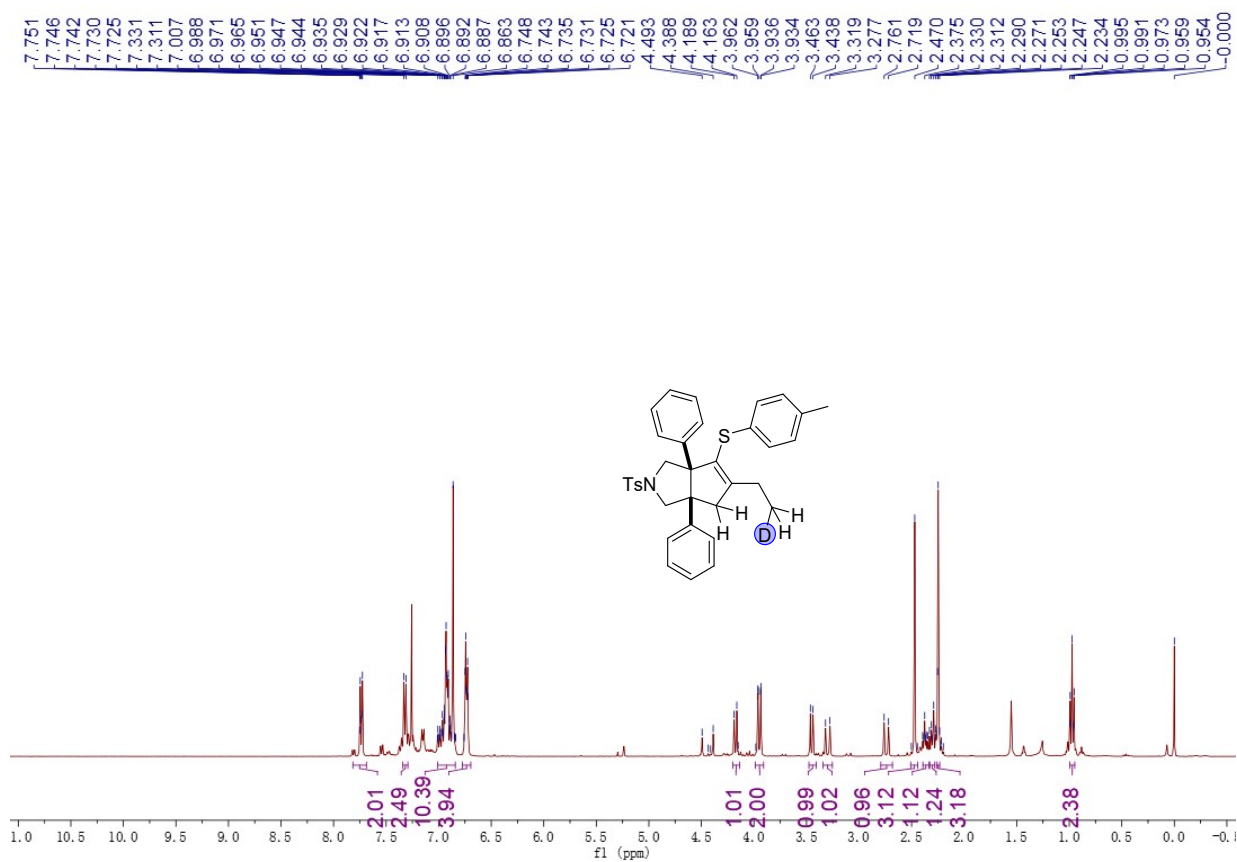

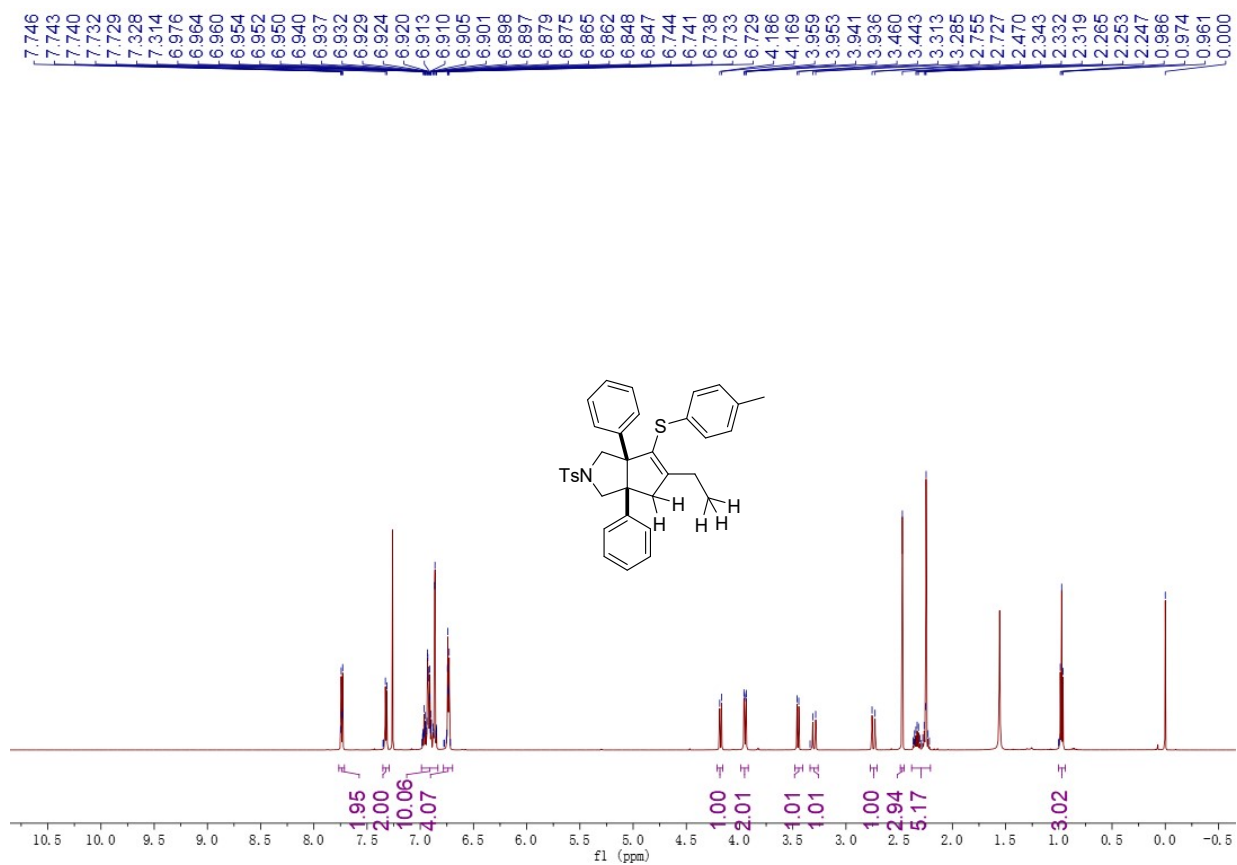

**Figure S5.** Deuterium labeling experiments.

(e) Kinetic isotope effect experiment.<sup>[7]</sup>

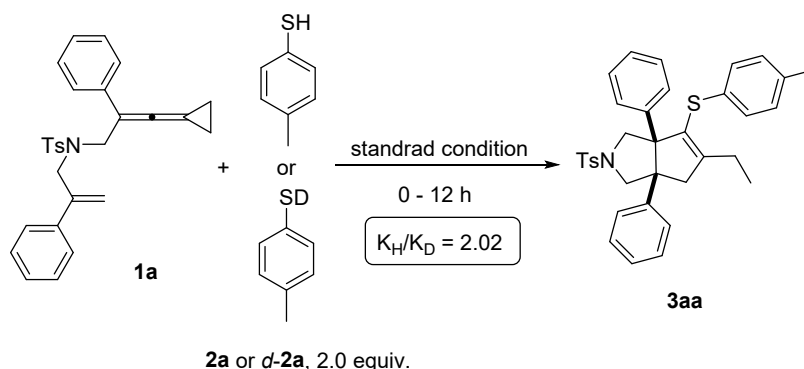

The reaction progress of **2a** or *d*-**2a** with **1a** was monitored in parallel at five distinct periods (0 h, 3.0 h, 6.0 h, 9.0 h, and 12 h). VDCP **1a** (0.1 mmol, 1.0 equiv.), TBAI (2.0 equiv.), **2a** or *d*<sub>1</sub>-**2a** (2.0 equiv.), and Ir(dtbpyp)ppy<sub>2</sub>PF<sub>6</sub> (3.0 mol%) were added in a flame dried 15 mL Schlenk tube. The reaction tube was placed under vacuum and backfilled with argon three times. Then, MeCN (10.0 mL) was added in the Schlenk tube via a syringe. Next, the eight tubes were placed 5.0 cm away from blue LEDs (30 W), and stirred vigorously under the irradiation of blue light at ambient temperature. At the end of each stage, the reaction tube was taken out. Then, the reaction mixture was concentrated in *vacuo* and analyzed by <sup>1</sup>H NMR spectrum using dimethyl terephthalate as an internal standard. The KIE of the reaction, which was calculated by dividing the rate constant of the reaction of **2a** ( $k_H = 6.4556$ ) by that of *d*-**2a** ( $k_D = 3.1889$ ), was determined to be 2.02

| time [h] | Yield of <b>3aa</b> [%]<br>(from <b>2a</b> ) | Yield of <b>3aa</b> [%]<br>(from <i>d</i> <sub>1</sub> - <b>2a</b> ) |
|----------|----------------------------------------------|----------------------------------------------------------------------|
| 0        | 0                                            | 0                                                                    |
| 3        | 21                                           | 11                                                                   |
| 6        | 37                                           | 16                                                                   |
| 9        | 58                                           | 28                                                                   |
| 12       | 78                                           | 40                                                                   |

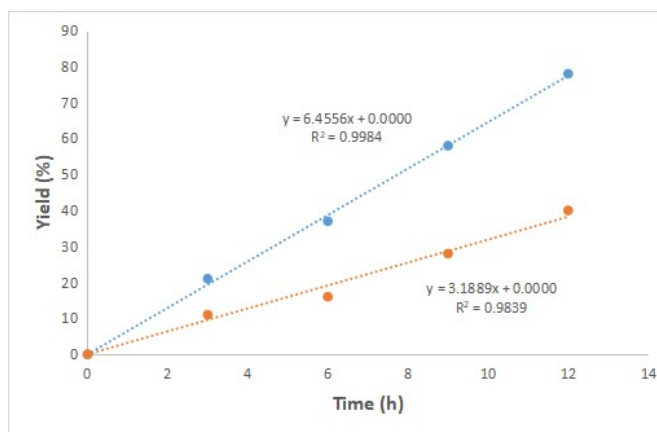

**Figure S6.** Kinetic isotope effect experiment

**(f) Control experiment.**

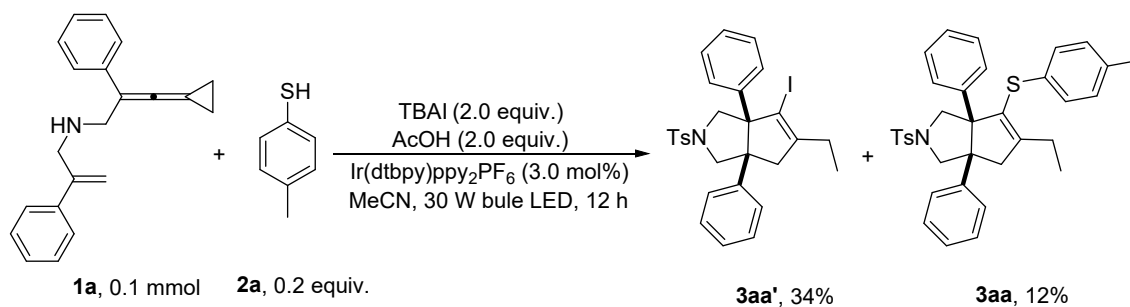

VDCP **1a** (0.1 mmol, 1.0 equiv.), TBAI (2.0 equiv.), **2a** (0.2 equiv.), AcOH (2.0 equiv.) and Ir(dtbpyp)ppy<sub>2</sub>PF<sub>6</sub> (3.0 mol%) were added in a flame dried 15 mL Schlenk tube. The reaction tube was placed under vacuum and backfilled with argon three times. Then, MeCN (10.0 mL) was added in the Schlenk tube via a syringe. Next, the tube was placed 5.0 cm away from blue LEDs (30 W), and stirred vigorously under the irradiation of blue light for 12 h. When the reaction finished up, the reaction mixture was concentrated in vacuo. However, **3aa** and **3aa'** are similar in polarity and cannot be separated, and thus, we confirmed the presence of **3aa'** by a mass spectrometric analysis.

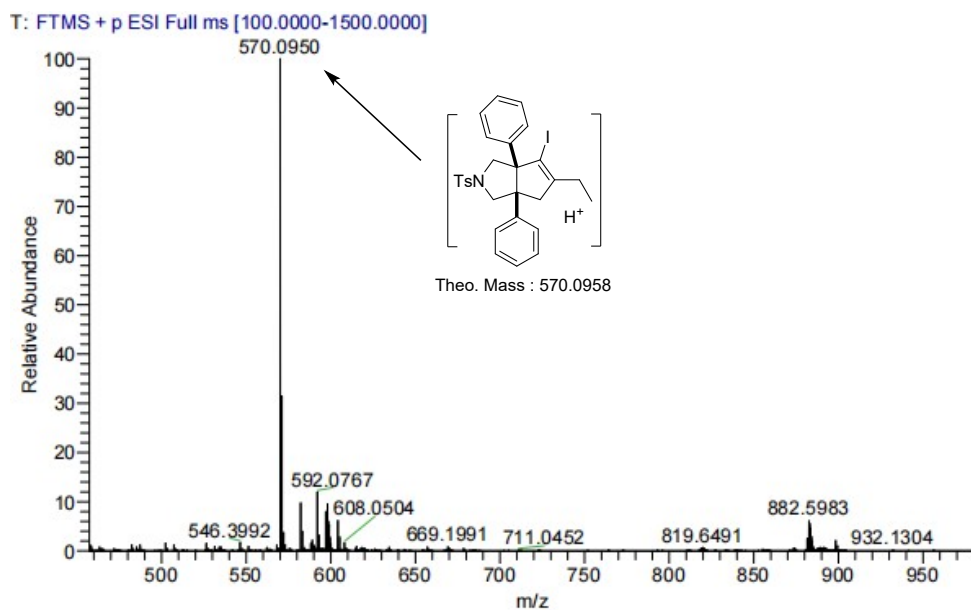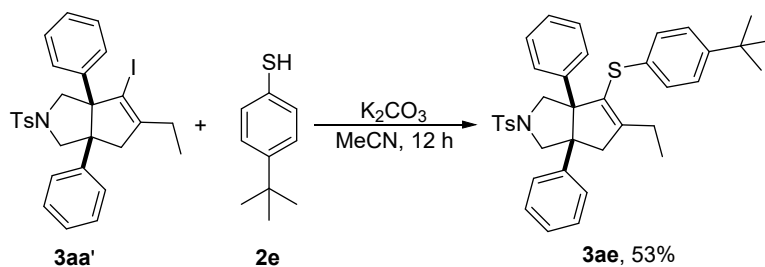

To a flame dried 25 mL flask was added **3aa'** (0.1 mmol), **2e** (2.0 equiv),  $\text{K}_2\text{CO}_3$  (2.0 equiv) and the solvent MeCN (10 mL). After the reaction mixture was stirred at room temperature for 12 hours, the resulting mixture was filtered with a pad of celite. The filtrate was concentrated. However, **3ae** and **3aa'** are similar in polarity and cannot be separated, and thus, we confirmed the presence of **3ae** by a mass spectrometric analysis.



## 6. Gram scale reaction

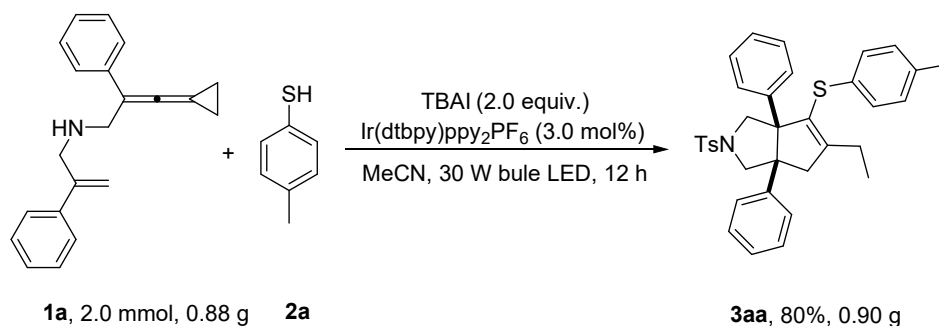

VDCP **1a** (2.0 mmol, 1.0 equiv.), TBAI (2.0 equiv.), **2a** (2.0 equiv.), and Ir(dtbbpy)ppy<sub>2</sub>PF<sub>6</sub> (3.0 mol%) were added in a flame dried 100 mL Schlenk flask. The reaction tube was placed under vacuum and backfilled with argon three times. Then, MeCN (60 mL) was added in the Schlenk flask via a syringe. Next, the tube was placed 5.0 cm away from blue LEDs (30 W), and stirred vigorously under the irradiation of blue light for 12 h. After completion, the solvent was removed under reduced pressure. The crude product residue was purified by a column chromatography on silica gel (PE/EA = 10/1) to afford the purified product **3aa** in 80% yield (0.90 g).

## 7. Transformation of product **3aa**.<sup>[6]</sup>

### A. Hydrogenative reduction reaction

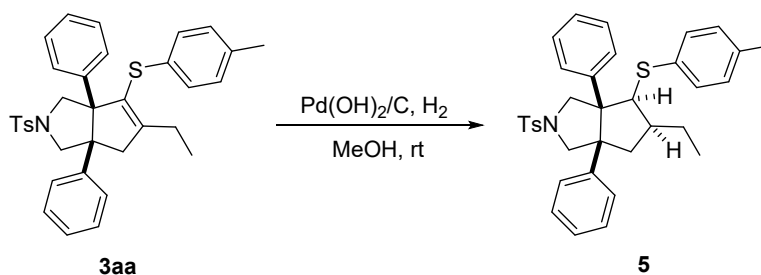

To a flask was added substrate **3aa** (0.1 mmol, 1.0 equiv), Pd(OH)<sub>2</sub>/C (16 mg) and MeOH (8.0 mL). After the reaction mixture was stirred at room temperature for 12 hours under 1.0 atm H<sub>2</sub>, the resulting mixture was filtered with a pad of celite. The filtrate was concentrated under reduced pressure and the residue was purified with a silica gel column chromatography (PE/EA = 4/1) to give product **5** as a colorless oil (83% yield).

### B. Oxidation reaction

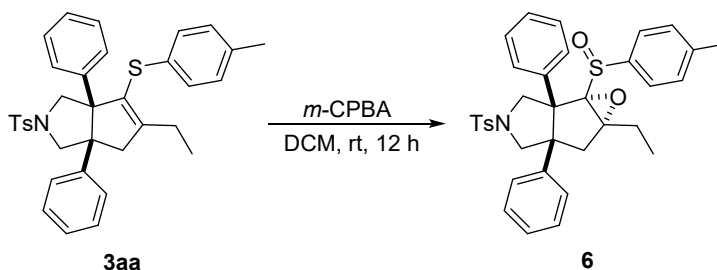

To a flask was added substrate **3aa** (0.1 mmol, 1.0 equiv.), 3-chloroperoxybenzoic acid (0.22 mmol, 2.2 equiv.), and DCM (10 mL). After the reaction mixture was stirred at room temperature for 12 hours, the resulting mixture was filtered with a pad of celite. The filtrate was concentrated and the residue was purified with a silica gel column chromatography (PE/EA = 4/1) to give product **6** as a colorless oil (78% yield).

## 8. Spectroscopic data of substrates 1

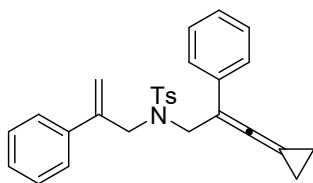

### *N*-(3-cyclopropylidene-2-phenyl-3 $\lambda$ <sup>5</sup>-allyl)-4-methyl-*N*-(2-phenylallyl)benzenesulfonamide (**1a**)

A colorless oil, 56% yield, 247.0 mg. <sup>1</sup>H NMR (CDCl<sub>3</sub>, TMS, 400 MHz)  $\delta$  7.64 (d,  $J$  = 8.3 Hz, 2H), 7.34 - 7.27 (m, 2H), 7.28 - 7.19 (m, 9H), 7.20 - 7.11 (m, 1H), 5.27 (s, 1H), 5.16 (s, 1H), 4.32 (s, 2H), 4.22 (s, 2H), 2.41 (s, 3H), 1.58 - 1.54 (m, 2H), 1.45 - 1.39 (m, 2H). <sup>13</sup>C NMR (CDCl<sub>3</sub>, TMS, 150 MHz)  $\delta$  190.2, 143.0, 142.4, 139.3, 137.0, 136.0, 129.5, 128.3, 128.2, 127.6, 127.4, 126.6, 126.3, 126.1, 115.7, 103.4, 80.7, 50.7, 48.7, 21.5, 8.4. IR (Acetone)  $\nu$  913, 1092, 1159, 1339, 1594, 1709, 2009, 2920 cm<sup>-1</sup>. HRMS (ESI) calcd. for C<sub>28</sub>H<sub>27</sub>NO<sub>2</sub>NaS (M+Na): 464.1655, Found: 464.1661.

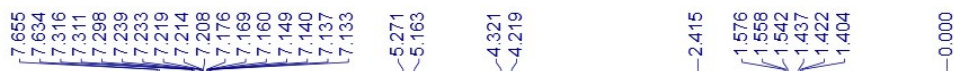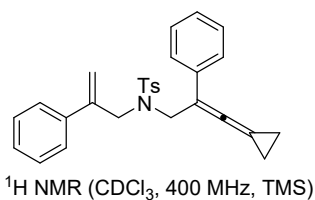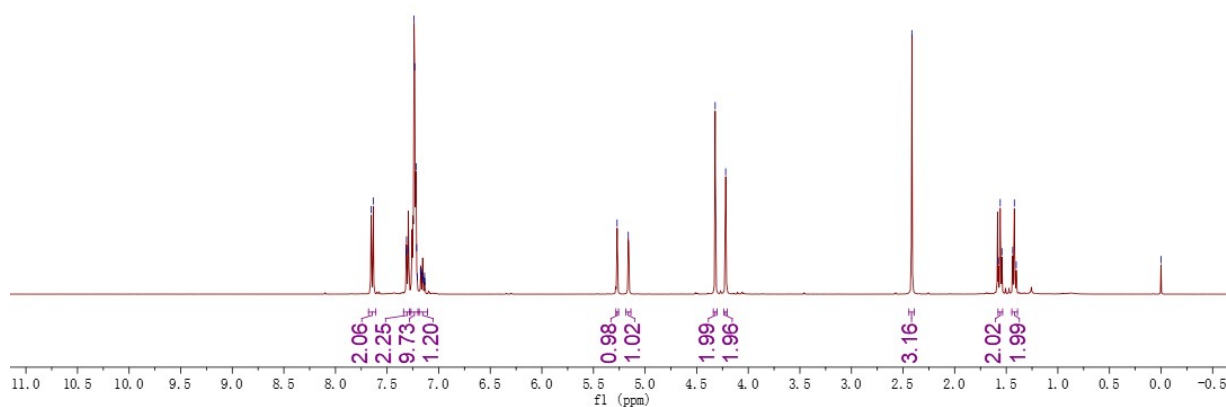

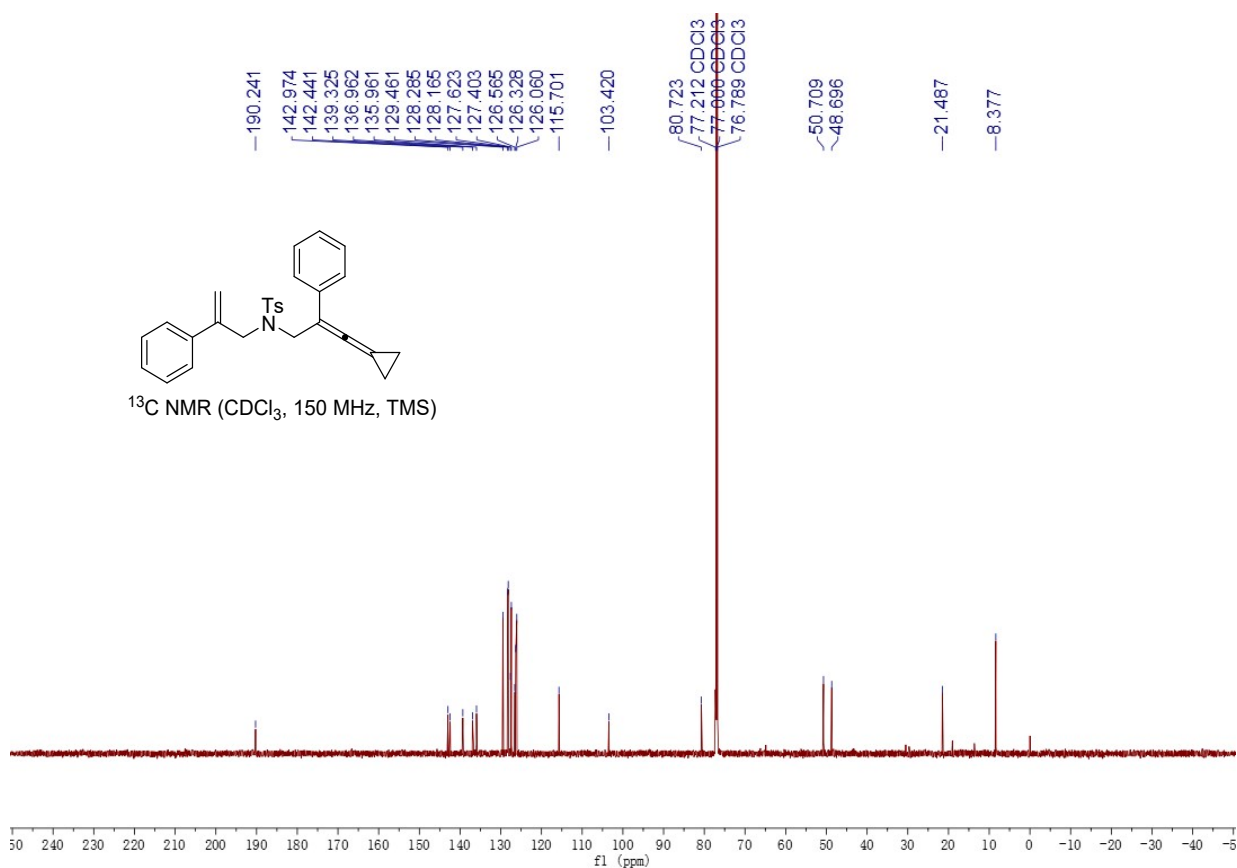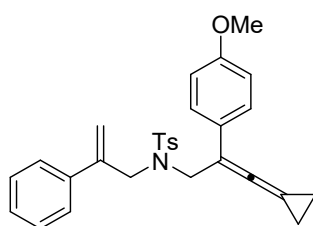

***N*-(3-cyclopropylidene-2-(4-methoxyphenyl)-3λ<sup>5</sup>-allyl)-4-methyl-*N*-(2-phenylallyl)benzenesulfonamide (1b)**

A yellow oil, 53% yield, 249.6 mg. <sup>1</sup>H NMR (CDCl<sub>3</sub>, TMS, 600 MHz) δ 7.64 (d, *J* = 8.3 Hz, 2H), 7.26 - 7.21 (m, 10H), 6.79 (d, *J* = 8.8 Hz, 2H), 5.27 (s, 1H), 5.15 (s, 1H), 4.29 (s, 2H), 4.20 (s, 2H), 3.79 (s, 3H), 2.42 (s, 3H), 1.55 - 1.51 (m, 2H), 1.41 - 1.38 (m, 2H). <sup>13</sup>C NMR (CDCl<sub>3</sub>, TMS, 150 MHz) δ 189.7, 158.4, 143.0, 142.5, 139.4, 136.9, 129.5, 128.2, 128.1, 127.6, 127.4, 127.3, 126.3, 115.6, 113.8, 103.0, 80.6, 55.3, 50.7, 49.1, 21.5, 8.1. IR (Acetone) ν 899, 1092, 1158, 1221, 1359, 1710, 3001 cm<sup>-1</sup>. HRMS (ESI) calcd. for C<sub>29</sub>H<sub>29</sub>NO<sub>3</sub>NaS (M+Na): 494.1760, Found: 494.1766.

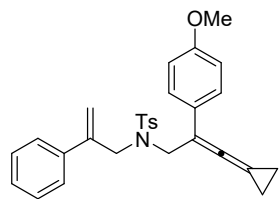

$^1\text{H NMR}$  ( $\text{CDCl}_3$ , 600 MHz, TMS)

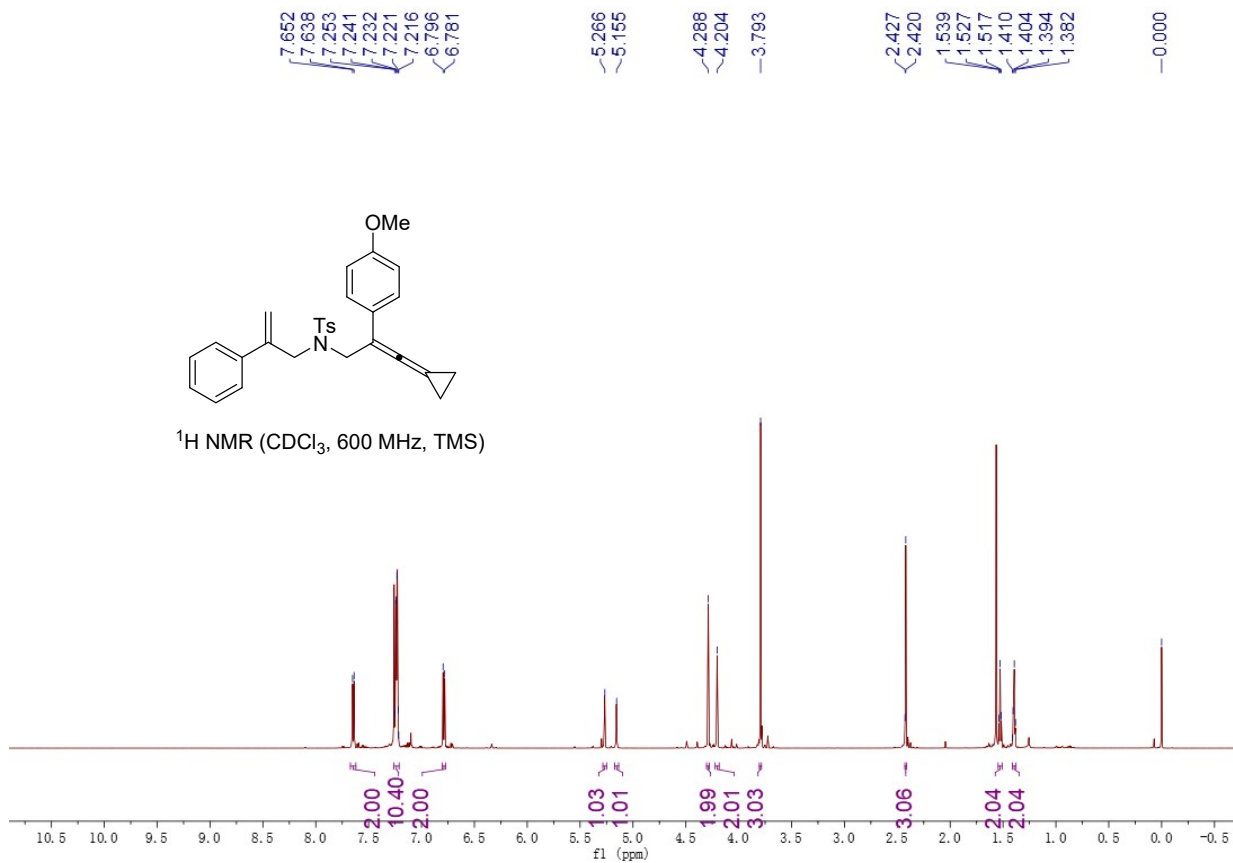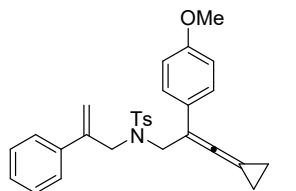

$^{13}\text{C NMR}$  ( $\text{CDCl}_3$ , 150 MHz, TMS)

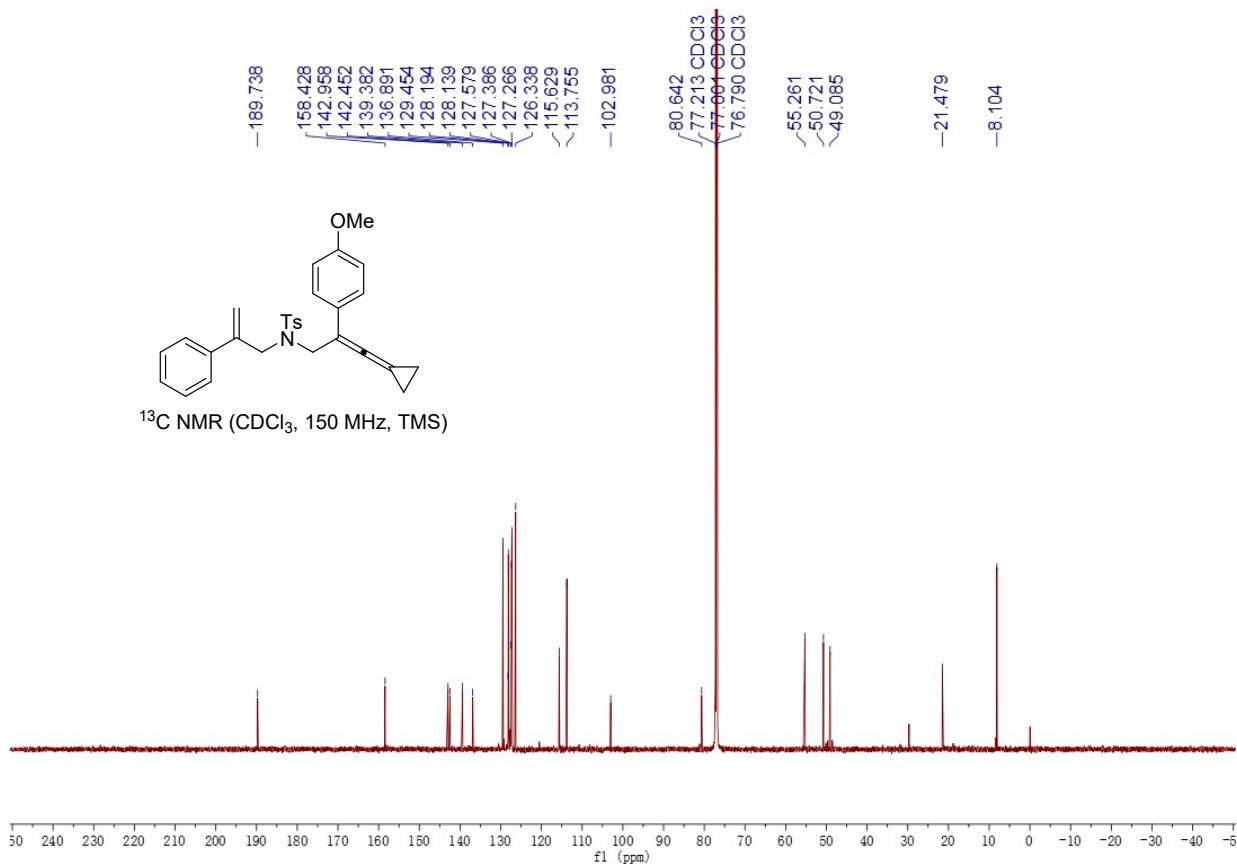

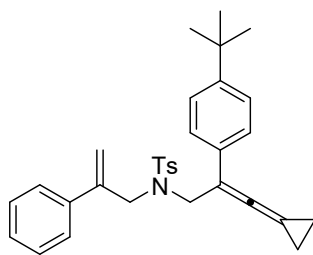

***N*-(2-(4-(tert-butyl)phenyl)-3-cyclopropylidene-3λ<sup>5</sup>-allyl)-4-methyl-*N*-(2-phenylallyl)benzenesulfonamide (1c)**

A colorless oil, 48% yield, 239.0 mg. <sup>1</sup>H NMR (CDCl<sub>3</sub>, TMS, 600 MHz) δ 7.63 (d, *J* = 8.4 Hz, 2H), 7.26 - 7.20 (m, 11H), 5.29 (s, 1H), 5.18 (s, 1H), 4.33 (s, 2H), 4.23 (s, 2H), 2.42 (s, 3H), 1.54 - 1.53 (m, 2H), 1.43 - 1.37 (m, 2H), 1.30 (s, 9H). <sup>13</sup>C NMR (CDCl<sub>3</sub>, TMS, 150 MHz) δ 190.0, 149.6, 142.9, 142.5, 139.3, 137.1, 133.0, 129.4, 128.1, 127.6, 127.4, 126.4, 125.8, 125.2, 115.7, 103.3, 80.7, 50.6, 48.5, 34.4, 31.3, 21.5, 8.2. IR (Acetone) ν 1092, 1161, 1341, 1709, 2007, 2963 cm<sup>-1</sup>. HRMS (ESI) calcd. for C<sub>32</sub>H<sub>35</sub>NO<sub>2</sub>NaS (M+Na): 520.2281, Found: 520.2290.

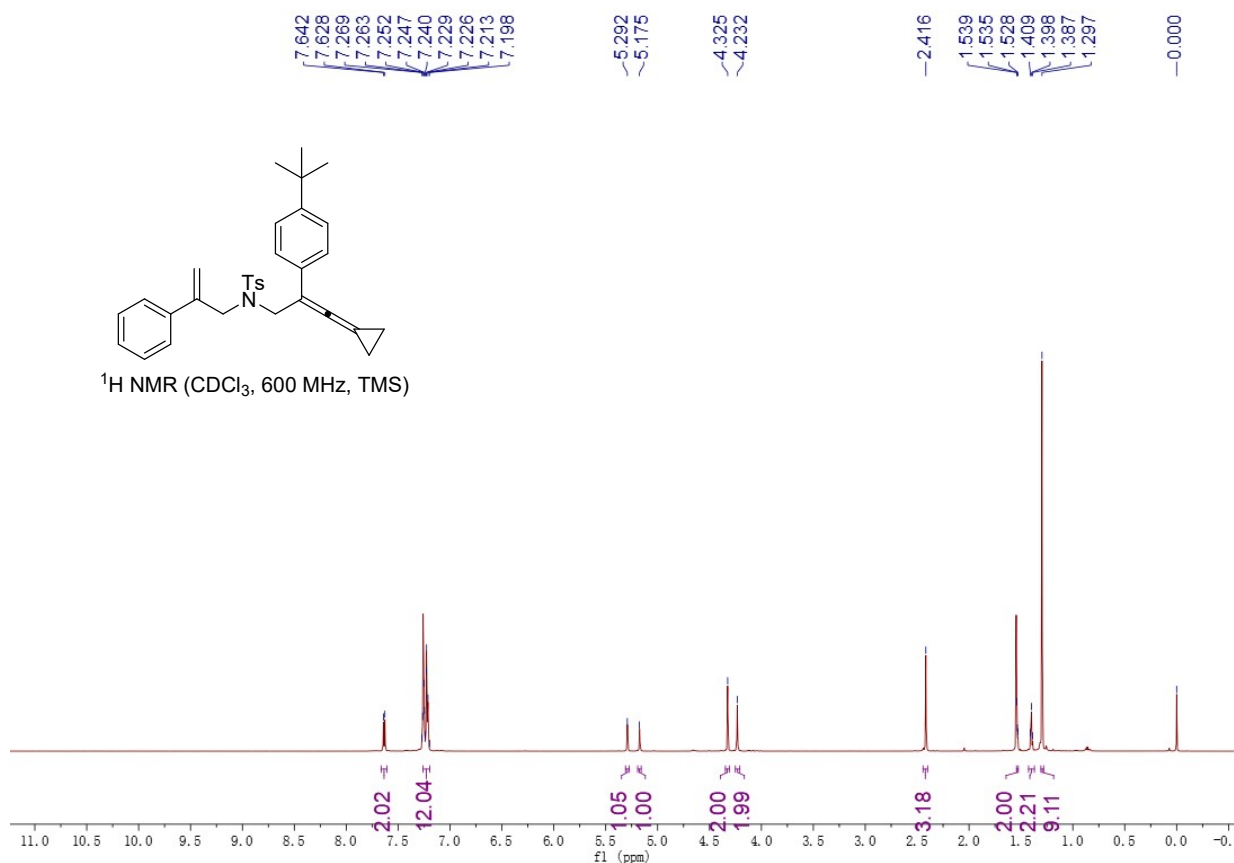

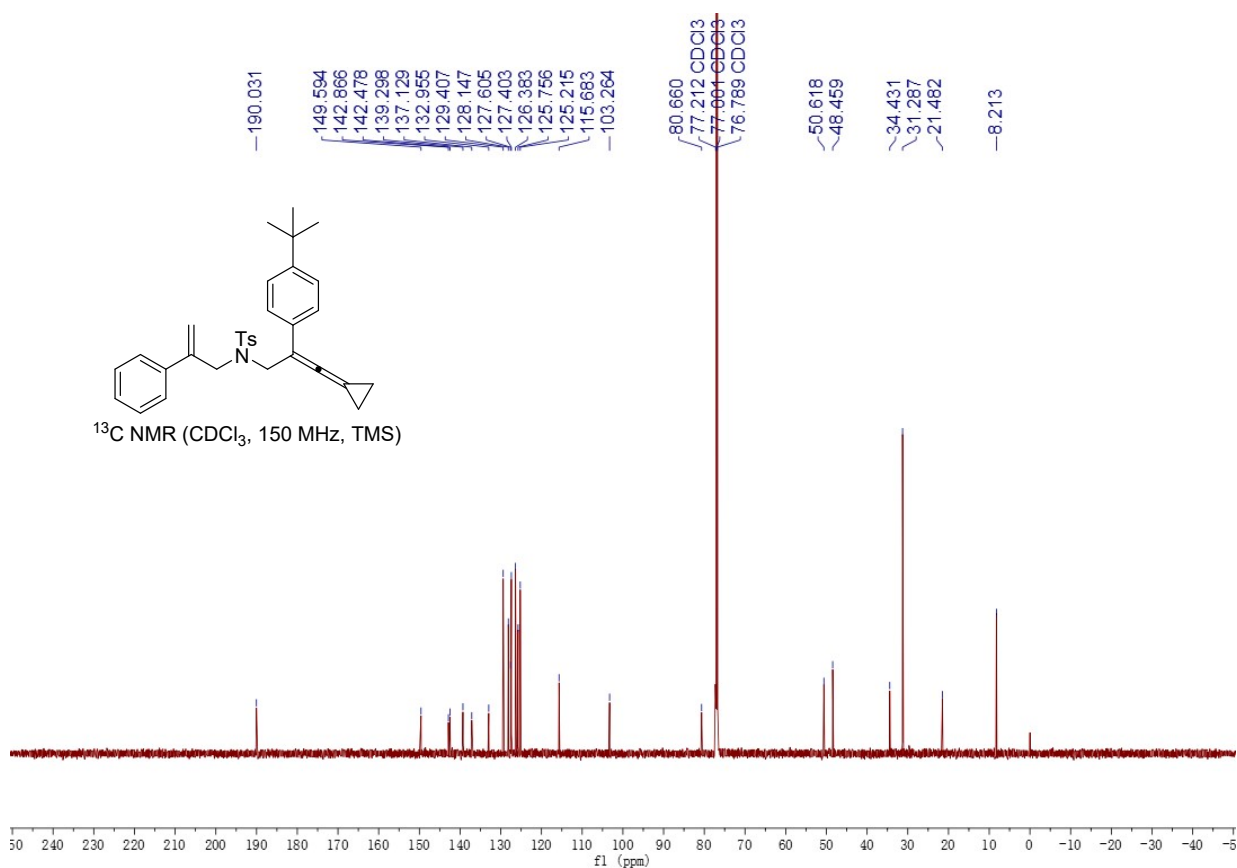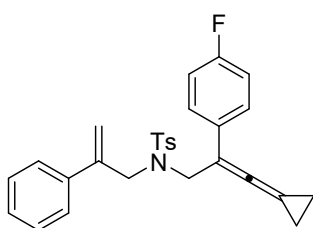

***N*-(3-cyclopropylidene-2-(4-fluorophenyl)-3λ<sup>5</sup>-allyl)-4-methyl-*N*-(2-phenylallyl)benzenesulfonamide (1d)**

A colorless oil, 55% yield, 252.8 mg. <sup>1</sup>H NMR (CDCl<sub>3</sub>, TMS, 600 MHz) δ 7.65 (d, *J* = 8.0 Hz, 2H), 7.28 - 7.21 (m, 9H), 6.92 (t, *J* = 8.7 Hz, 2H), 5.26 (s, 1H), 5.13 (s, 1H), 4.26 (s, 2H), 4.19 (s, 2H), 2.43 (s, 3H), 1.58 - 1.56 (m, 2H), 1.46 - 1.42 (m, 2H). <sup>13</sup>C NMR (CDCl<sub>3</sub>, TMS, 150 MHz) δ 190.2, 161.6 (d, *J* = 246.9 Hz), 143.1, 142.5, 139.2, 136.6, 131.8 (d, *J* = 3.8 Hz), 129.5, 128.2, 127.6 (d, *J* = 8.3 Hz), 127.4, 126.3, 115.7, 115.1 (d, *J* = 21.0 Hz), 102.6, 80.7, 51.0, 49.4, 21.5, 8.3. <sup>19</sup>F NMR (CDCl<sub>3</sub>, TMS, 564 MHz) δ -116.0 (s). IR (Acetone) ν 1092, 1159, 1221, 1359, 1420, 1710, 3003 cm<sup>-1</sup>. HRMS (ESI) calcd. for C<sub>28</sub>H<sub>26</sub>NO<sub>2</sub>FNaS (M+Na): 482.1561, Found: 482.1563.

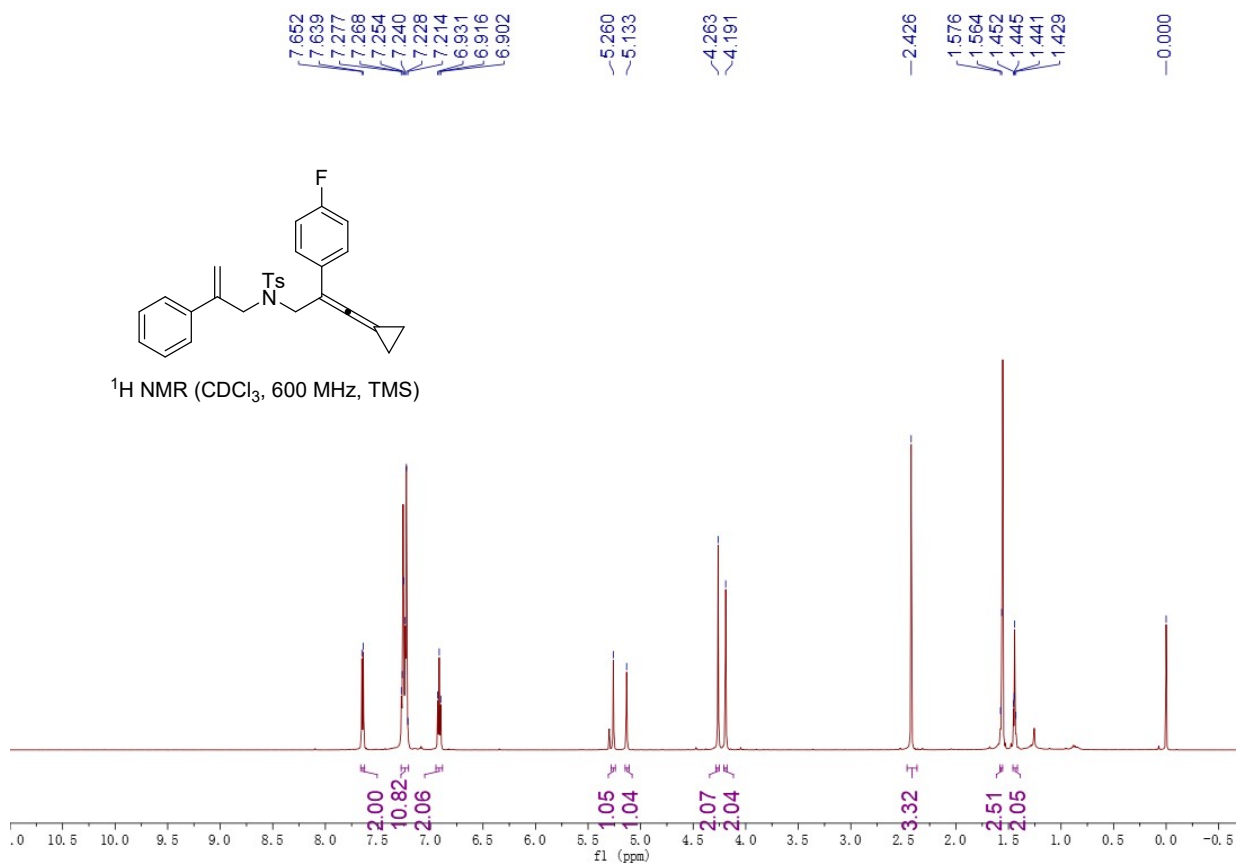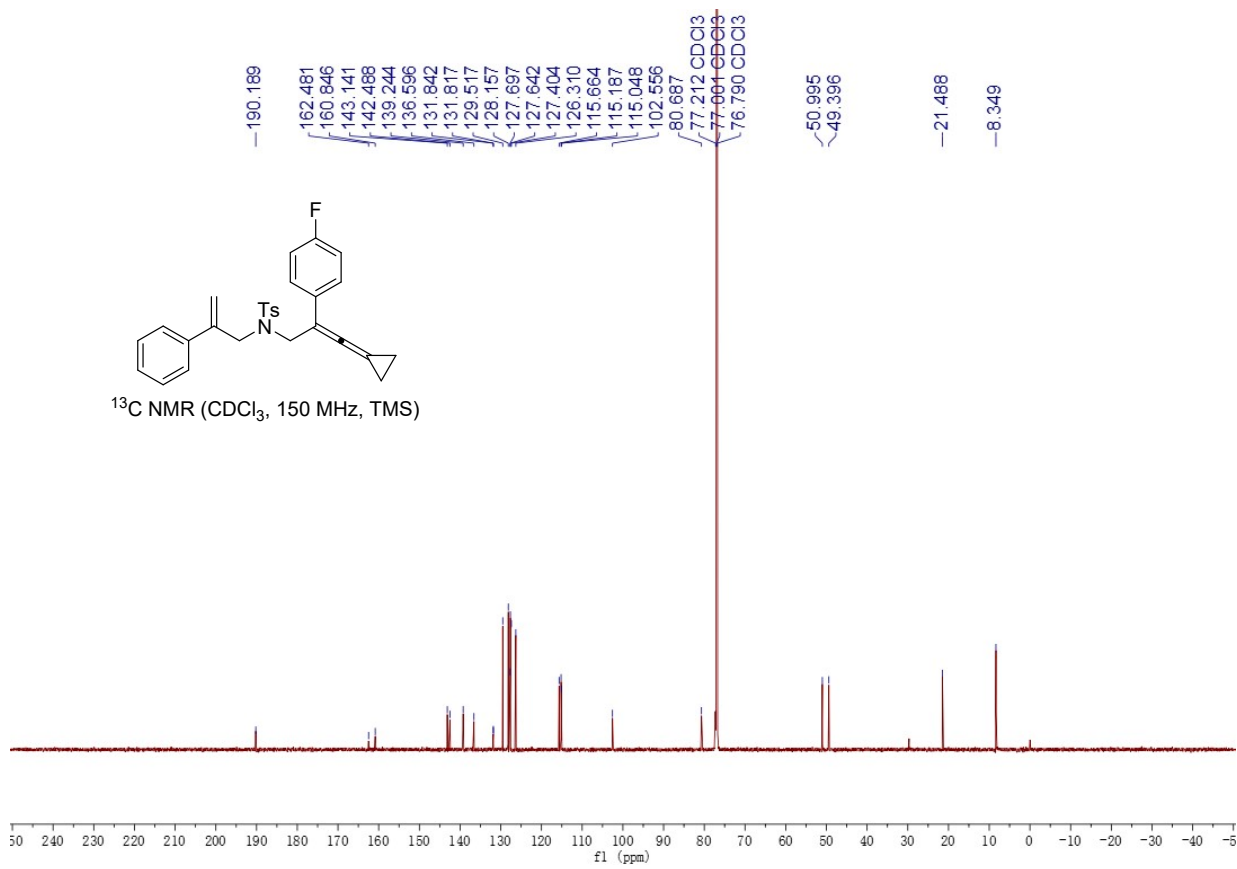



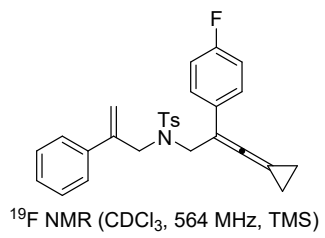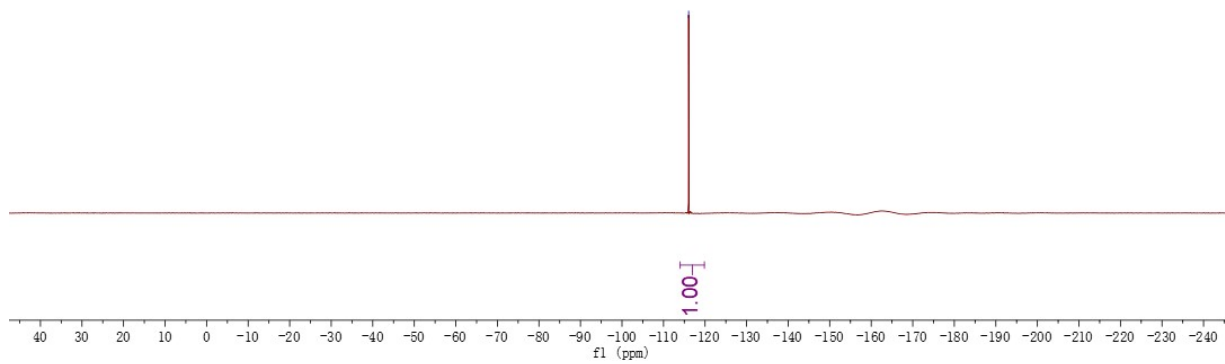

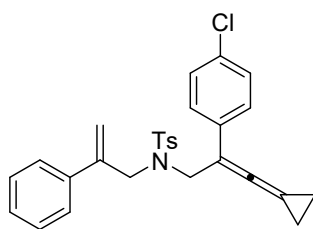

***N*-(2-(4-chlorophenyl)-3-cyclopropylidene-3λ<sup>5</sup>-allyl)-4-methyl-*N*-(2-phenylallyl)benzenesulfonamide (1e)**

A colorless oil, 60% yield, 285.6 mg. <sup>1</sup>H NMR (CDCl<sub>3</sub>, TMS, 600 MHz) δ 7.64 (d, *J* = 8.0 Hz, 2H), 7.26 - 7.21 (m, 9H), 7.18 (d, *J* = 8.6 Hz, 2H), 5.26 (s, 1H), 5.13 (s, 1H), 4.25 (s, 2H), 4.19 (s, 2H), 2.43 (s, 3H), 1.59 - 1.57 (m, 2H), 1.47 - 1.44 (m, 2H). <sup>13</sup>C NMR (CDCl<sub>3</sub>, TMS, 150 MHz) δ 190.3, 143.2, 142.5, 139.2, 136.6, 134.5, 132.2, 129.5, 128.3, 128.2, 127.7, 127.4, 127.3, 126.3, 115.7, 102.5, 80.8, 51.0, 49.2, 21.5, 8.6. IR (Acetone) ν 906, 1092, 1160, 1221, 1359, 1420, 1710, 3006 cm<sup>-1</sup>. HRMS (ESI) calcd. for C<sub>28</sub>H<sub>26</sub>NO<sub>2</sub>NaCl (M+Na): 498.1265, Found: 498.1264.

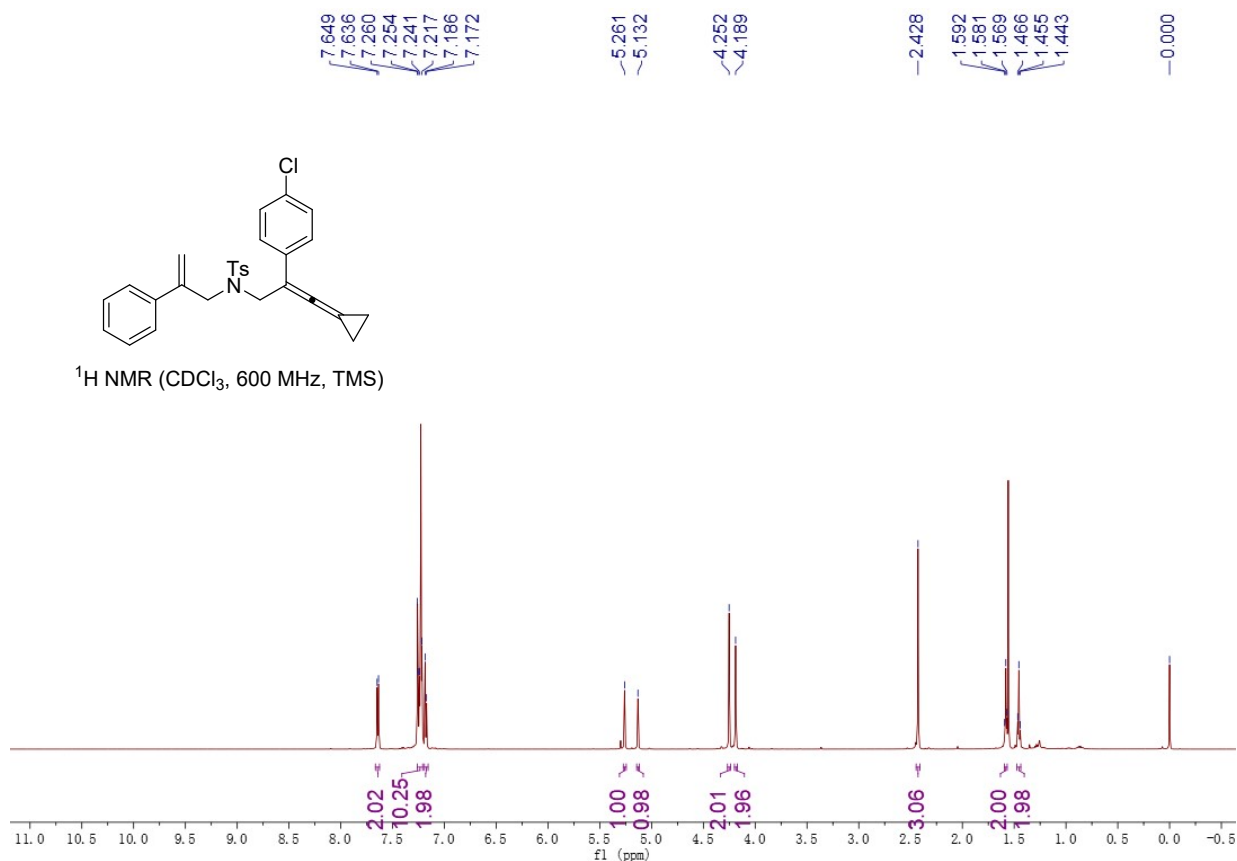

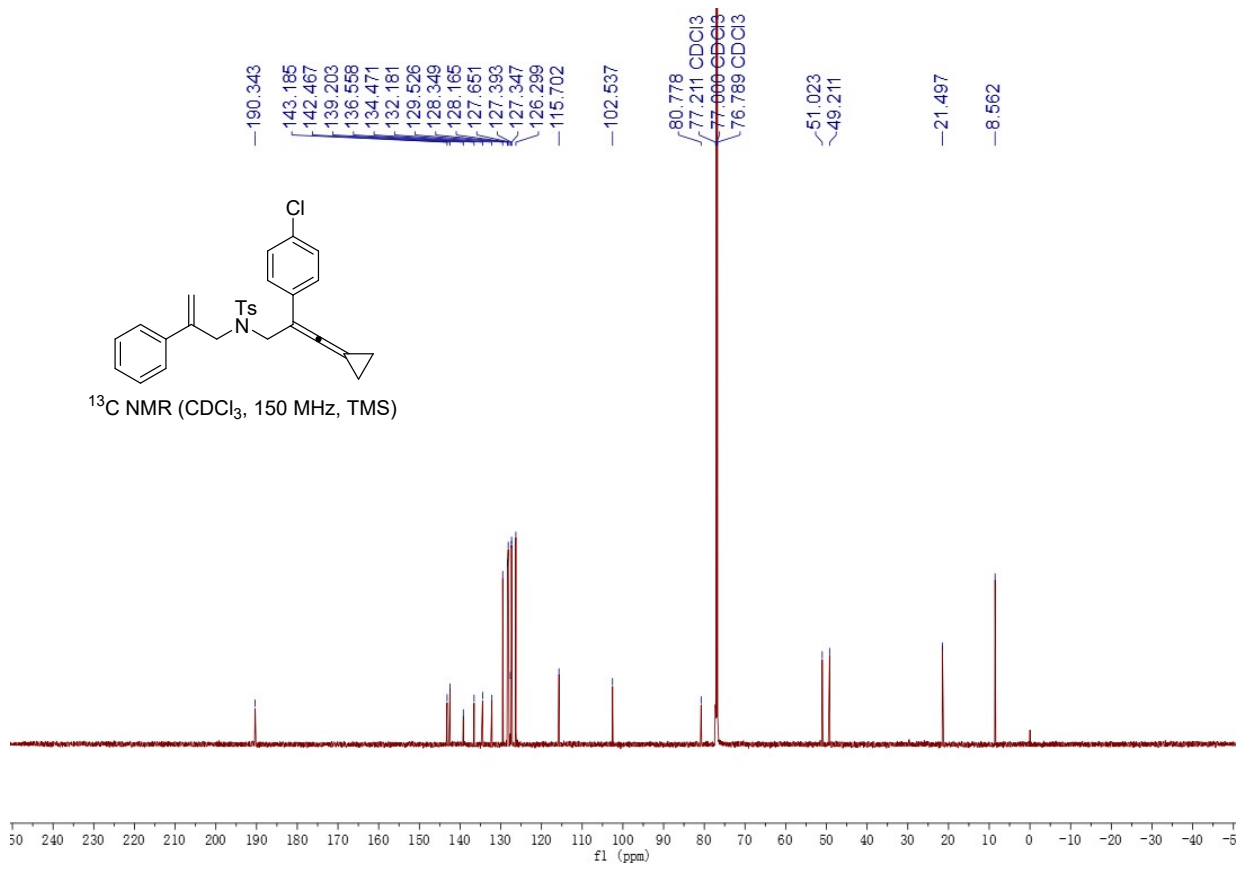

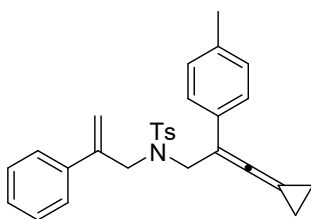

***N*-(3-cyclopropylidene-2-(*p*-tolyl)-3λ<sup>5</sup>-allyl)-4-methyl-*N*-(2-phenylallyl)benzenesulfonamide (1g)**

A colorless oil, 62% yield, 282.0 mg. <sup>1</sup>H NMR (CDCl<sub>3</sub>, TMS, 400 MHz) δ 7.64 (d, *J* = 8.1 Hz, 2H), 7.25 - 7.17 (m, 9H), 7.05 (d, *J* = 8.0 Hz, 2H), 5.28 (s, 1H), 5.16 (s, 1H), 4.31 (s, 2H), 4.22 (s, 2H), 2.42 (s, 3H), 2.31 (s, 3H), 1.55 - 1.52 (m, 2H), 1.42 - 1.36 (m, 2H). <sup>13</sup>C NMR (CDCl<sub>3</sub>, TMS, 150 MHz) δ 189.9, 142.9, 142.4, 139.4, 137.1, 136.3, 133.0, 129.4, 129.0, 128.2, 127.6, 127.4, 126.3, 126.0, 115.7, 103.3, 80.7, 50.6, 48.6, 21.5, 21.1, 8.2. IR (Acetone) ν 898, 1093, 1157, 1339, 1714, 2001, 2985 cm<sup>-1</sup>. HRMS (ESI) calcd. for C<sub>29</sub>H<sub>29</sub>NO<sub>2</sub>NaS (M+Na): 478.1811, Found: 478.1814.

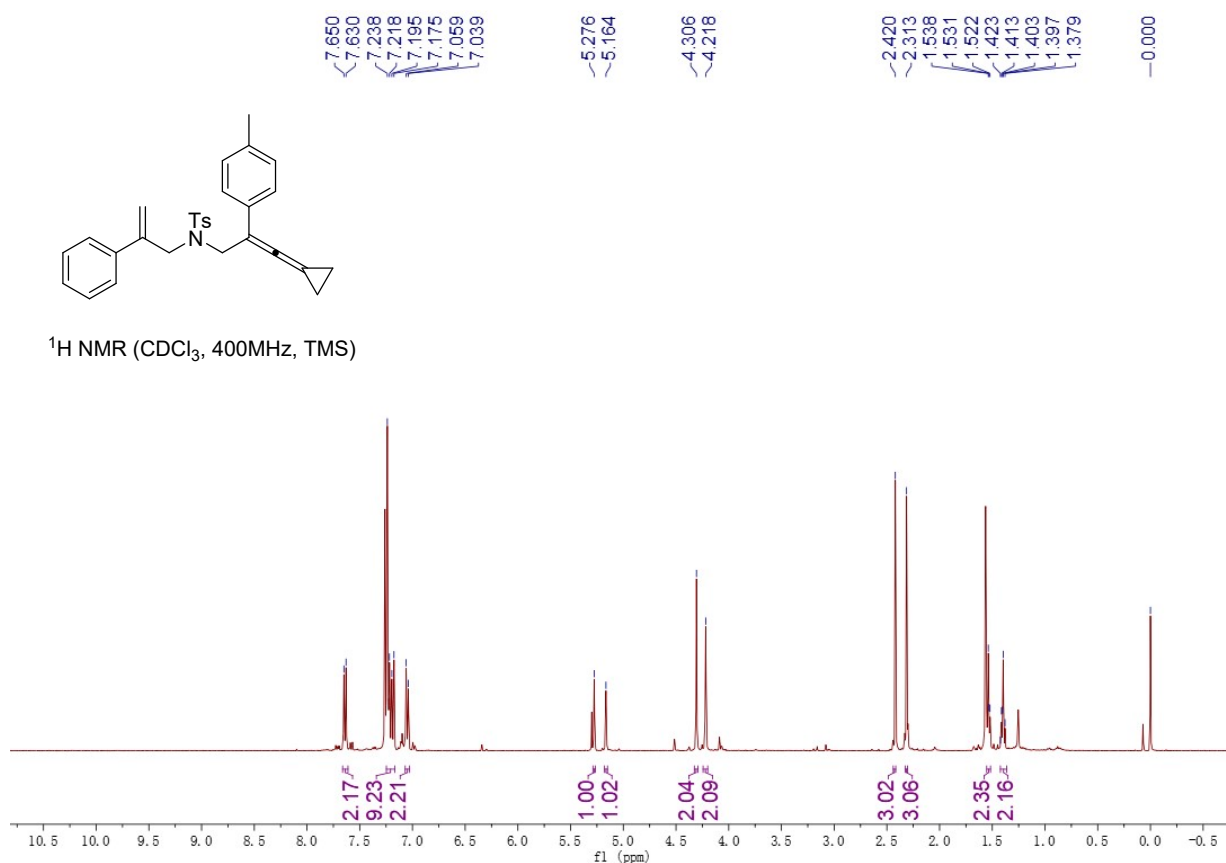

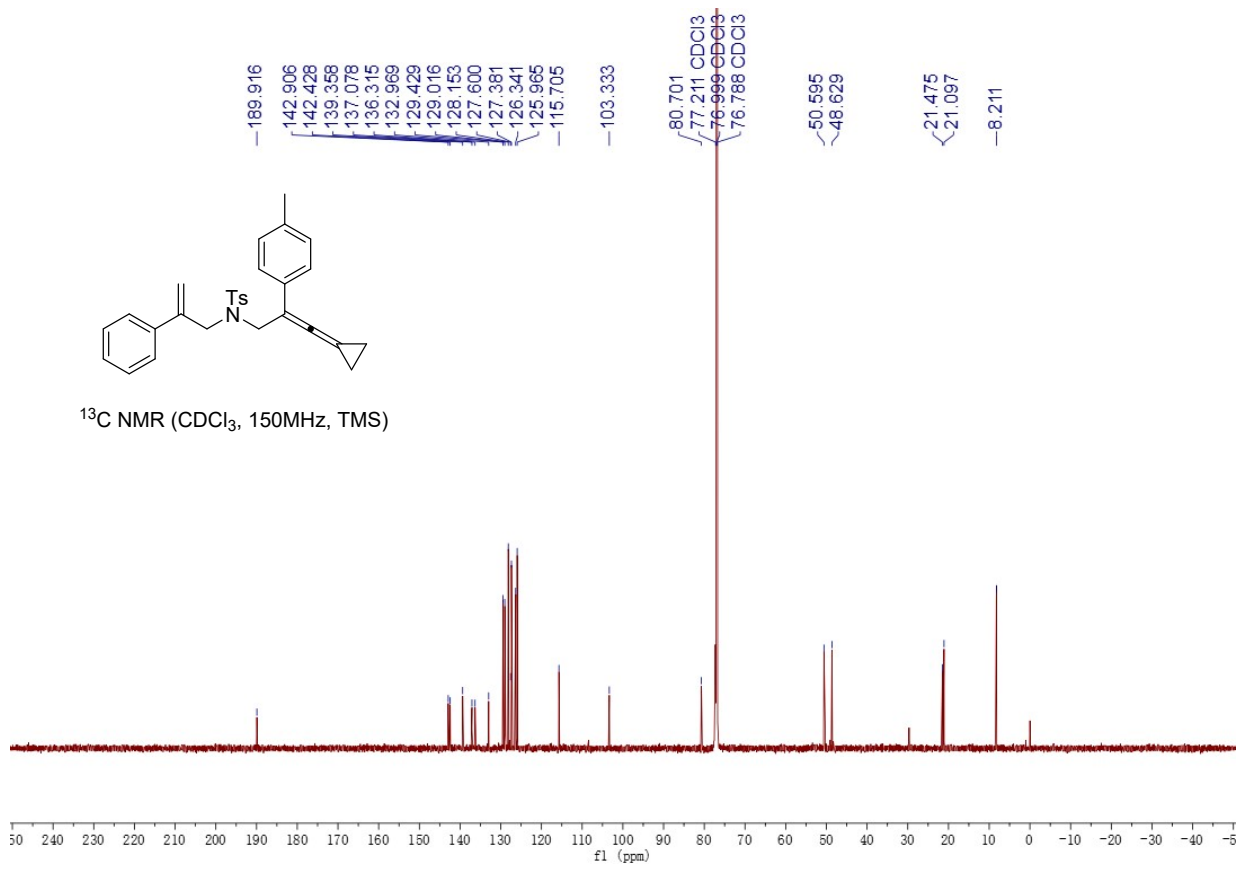

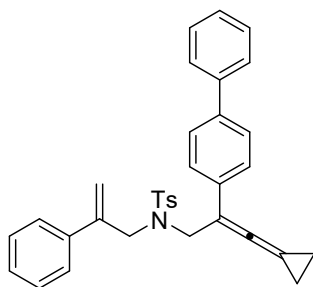

***N*-(2-([1,1'-biphenyl]-4-yl)-3-cyclopropylidene-3λ<sup>5</sup>-allyl)-4-methyl-*N*-(2-phenylallyl)benzenesulfonamide (1h)**

A colorless oil, 53% yield, 274.3 mg. <sup>1</sup>H NMR (CDCl<sub>3</sub>, TMS, 400 MHz) δ 7.66 (d, *J* = 8.2 Hz, 2H), 7.58 (d, *J* = 8.0 Hz, 2H), 7.50 - 7.41 (m, 5H), 7.38 - 7.32 (m, 3H), 7.25 - 7.21 (m, 6H), 5.29 (s, 1H), 5.19 (s, 1H), 4.35 (s, 2H), 4.24 (s, 2H), 2.41 (s, 3H), 1.62 - 1.57 (m, 2H), 1.47 - 1.43 (m, 2H). <sup>13</sup>C NMR (CDCl<sub>3</sub>, TMS, 100 MHz) δ 190.4, 143.0, 142.5, 140.8, 139.3, 136.9, 135.0, 129.5, 128.8, 128.2, 127.6, 127.4, 127.2, 126.93, 126.87, 126.5, 126.4, 120.3, 115.7, 110.2, 103.1, 80.7, 48.8, 21.5, 8.5. IR (Acetone) ν 1091, 1220, 1359, 1422, 1711, 2998 cm<sup>-1</sup>. HRMS (ESI) calcd. for C<sub>34</sub>H<sub>32</sub>NO<sub>2</sub>S (M+H): 518.2148, Found: 518.2117.

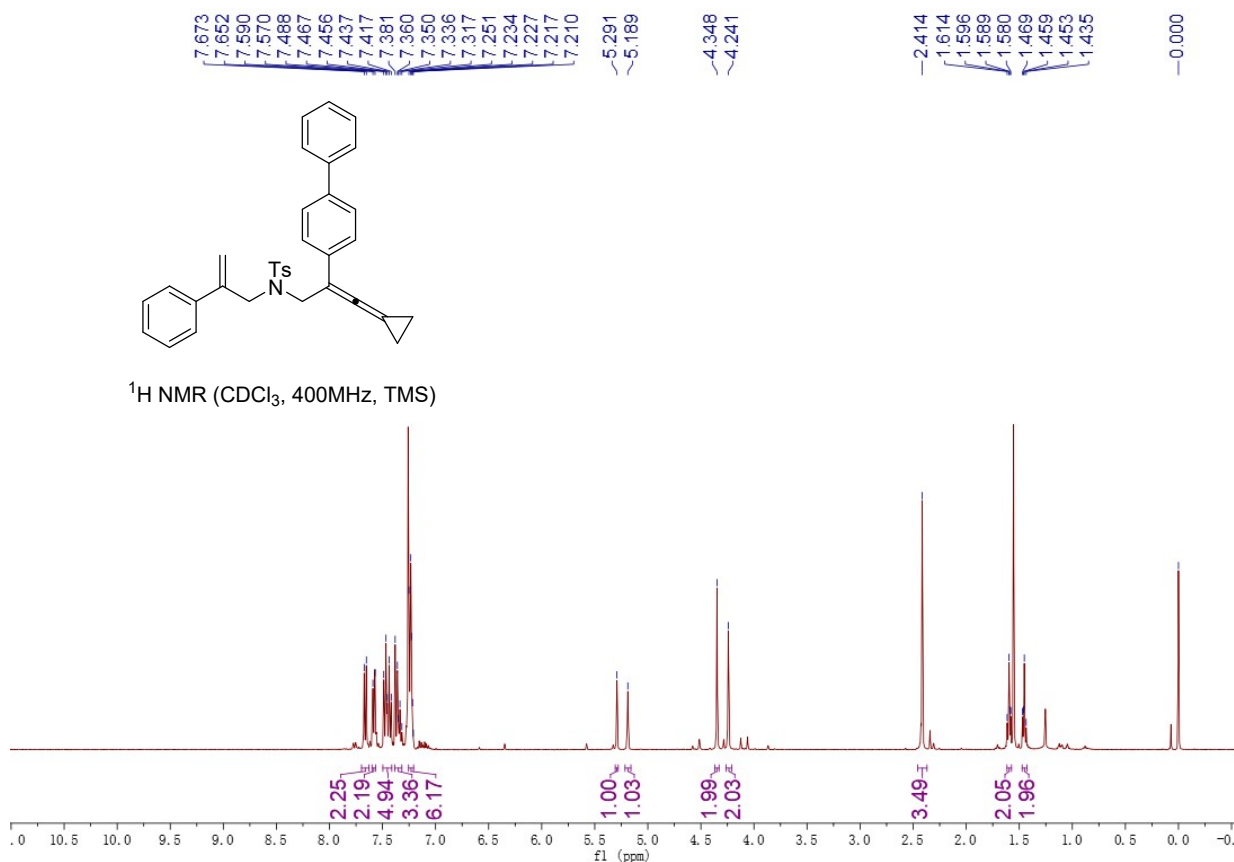

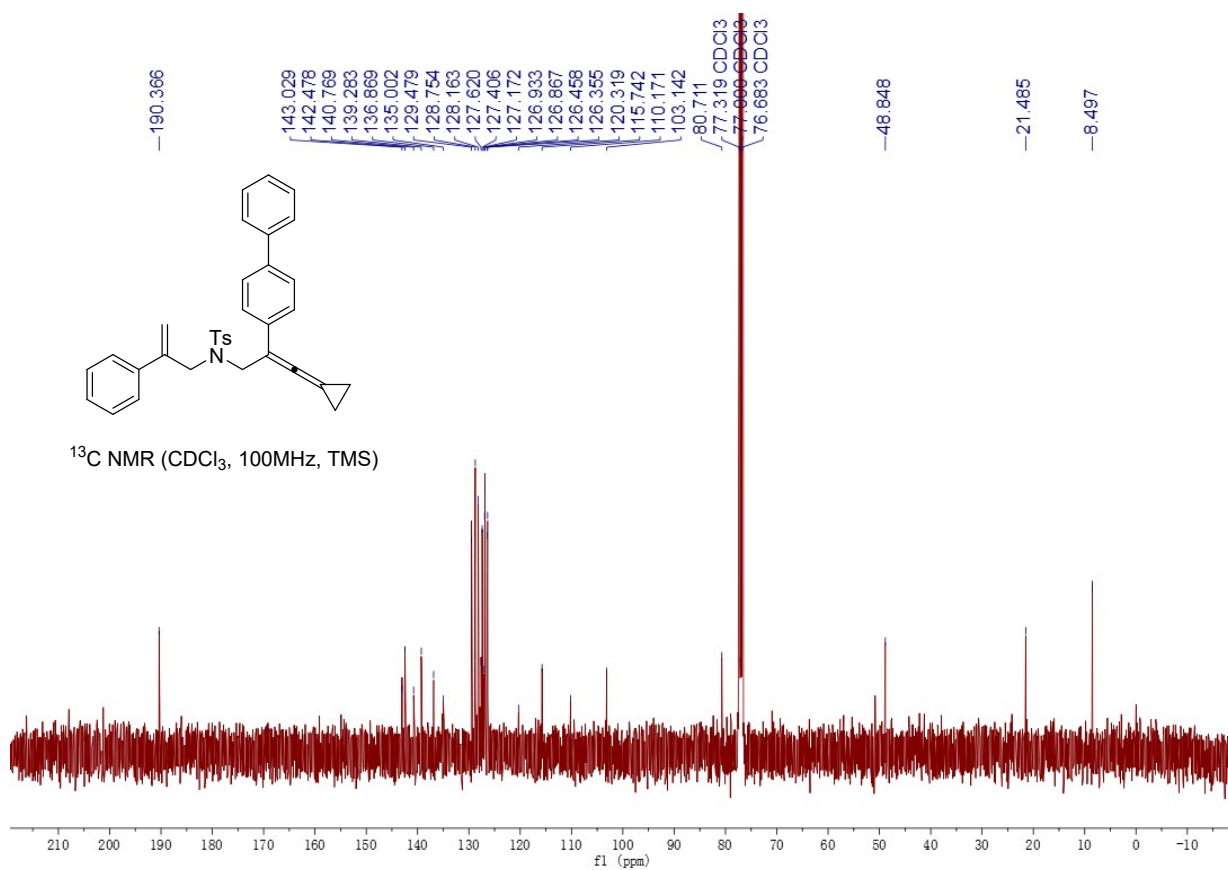

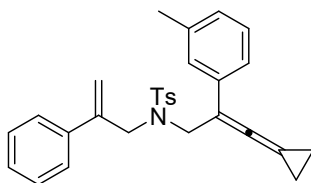

***N*-(3-cyclopropylidene-2-(*m*-tolyl)-3λ<sup>5</sup>-allyl)-4-methyl-*N*-(2-phenylallyl)benzenesulfonamide**

**(1i)**

A colorless oil, 55% yield, 250.6 mg. <sup>1</sup>H NMR (CDCl<sub>3</sub>, TMS, 600 MHz) δ 7.64 (d, *J* = 8.2 Hz, 2H), 7.26 - 7.20 (m, 7H), 7.16 - 7.05 (m, 3H), 6.98 (d, *J* = 7.2 Hz, 1H), 5.30 (s, 1H), 5.18 (s, 1H), 4.32 (s, 2H), 4.24 (s, 2H), 2.42 (s, 3H), 2.28 (s, 3H), 1.58 - 1.55 (m, 2H), 1.44 - 1.39 (m, 2H). <sup>13</sup>C NMR (CDCl<sub>3</sub>, TMS, 150 MHz) δ 190.1, 142.9, 142.5, 139.3, 137.8, 137.2, 135.9, 129.4, 128.18, 128.16, 127.6, 127.42, 127.38, 126.8, 126.3, 123.2, 115.7, 103.5, 80.7, 50.6, 48.5, 21.5, 8.3. IR (Acetone) ν 901, 1094, 1137, 1339, 1724, 2011, 2995 cm<sup>-1</sup>. HRMS (ESI) calcd. for C<sub>29</sub>H<sub>29</sub>NO<sub>2</sub>SNa (M+Na): 478.1811, Found: 478.1811.

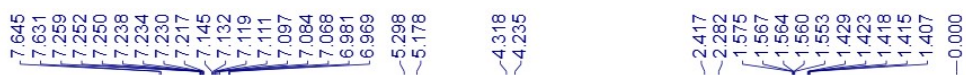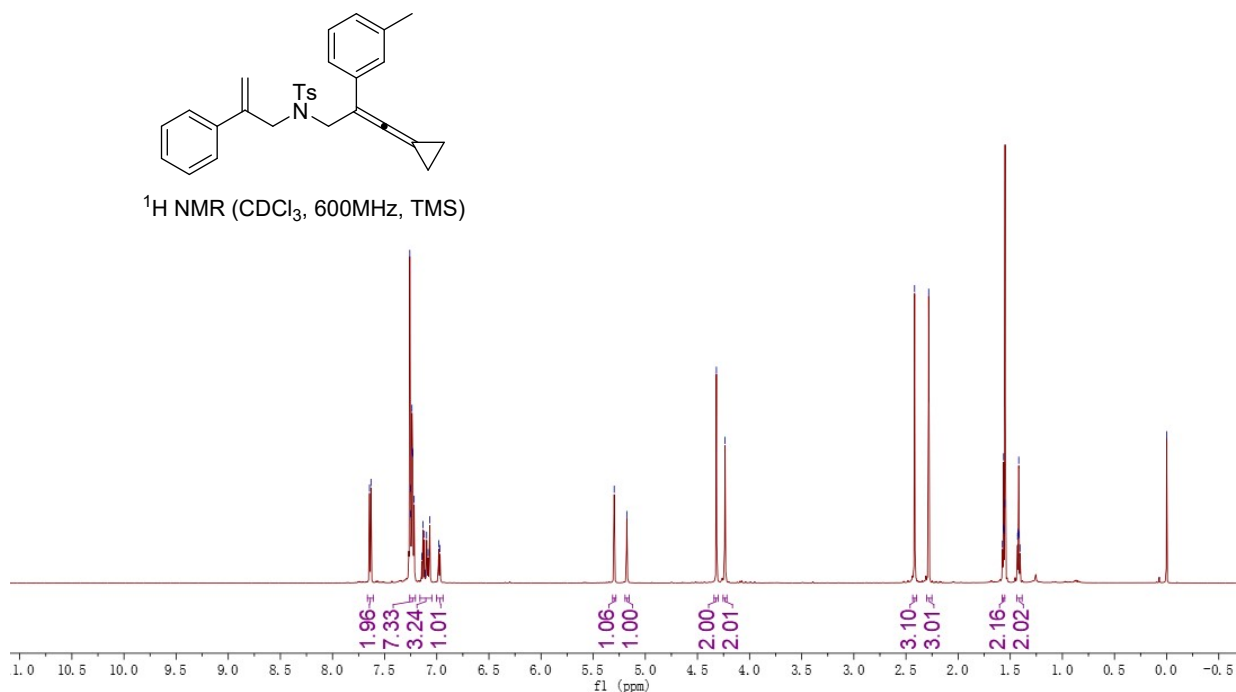



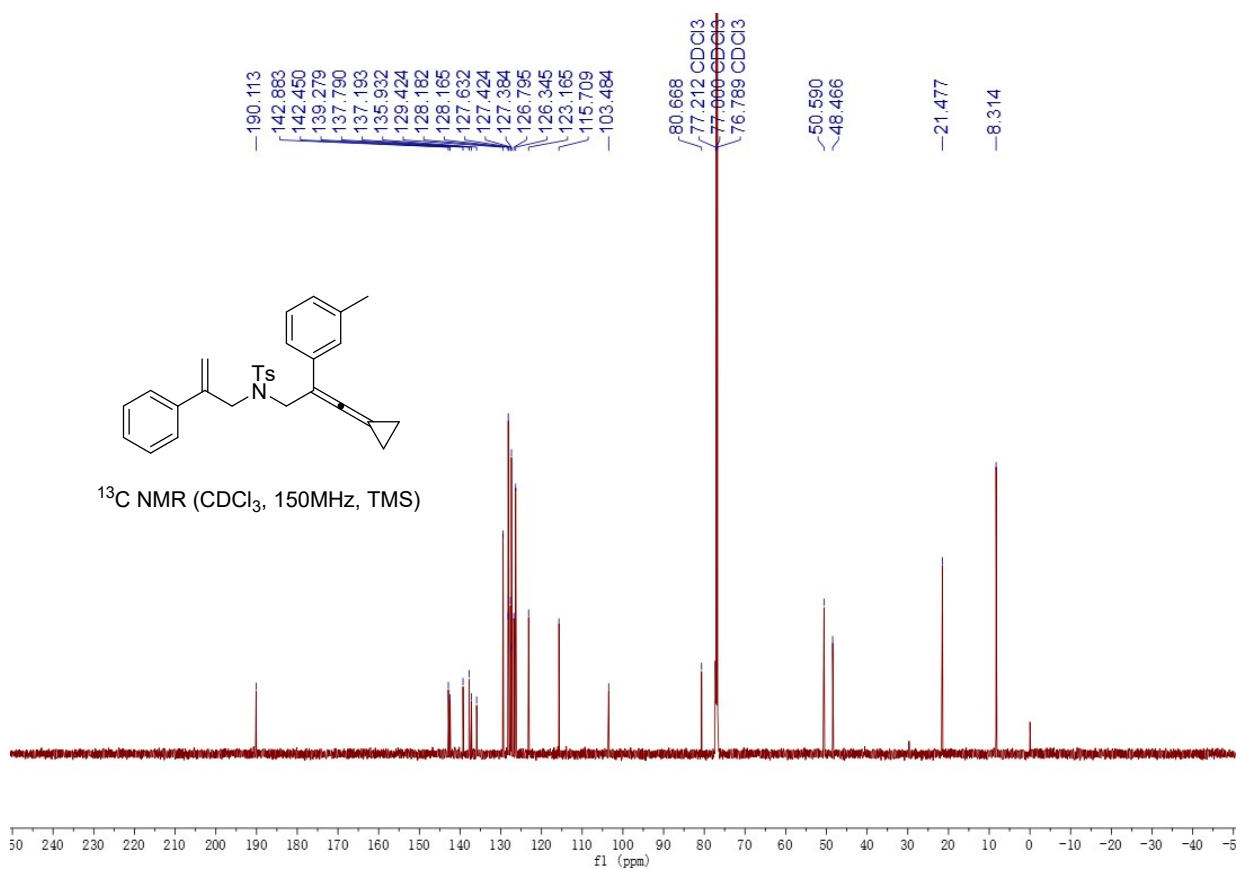

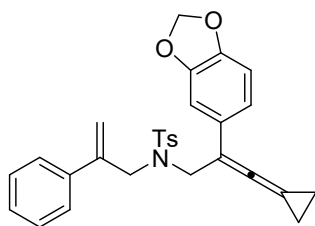

***N*-(2-(benzo[*d*][1,3]dioxol-5-yl)-3-cyclopropylidene-3λ<sup>5</sup>-allyl)-4-methyl-*N*-(2-phenylallyl)benzenesulfonamide (1j)**

A colorless oil, 42% yield, 203.9 mg. <sup>1</sup>H NMR (CDCl<sub>3</sub>, TMS, 600 MHz) δ 7.57 (d, *J* = 8.3 Hz, 2H), 7.20 - 7.15 (m, 7H), 6.73 (d, *J* = 8.2 Hz, 1H), 6.68 (s, 1H), 6.62 (d, *J* = 8.1 Hz, 1H), 5.85 (s, 2H), 5.22 (s, 1H), 5.10 (s, 1H), 4.18 (s, 2H), 4.14 (s, 2H), 2.35 (s, 3H), 1.47 - 1.45 (m, 2H), 1.35 - 1.32 (m, 2H). <sup>13</sup>C NMR (CDCl<sub>3</sub>, TMS, 150 MHz) δ 189.8, 147.7, 146.4, 143.0, 142.5, 139.3, 136.9, 130.0, 129.5, 128.2, 127.6, 127.4, 127.3, 126.3, 119.2, 115.6, 108.1, 106.9, 103.3, 100.9, 80.8, 50.8, 49.1, 21.5, 8.2. IR (Acetone) ν 900, 1092, 1221, 1359, 1421, 1709, 3001 cm<sup>-1</sup>. HRMS (ESI) calcd. for C<sub>29</sub>H<sub>27</sub>NO<sub>4</sub>SNa (M+Na): 508.1553, Found: 508.1548.

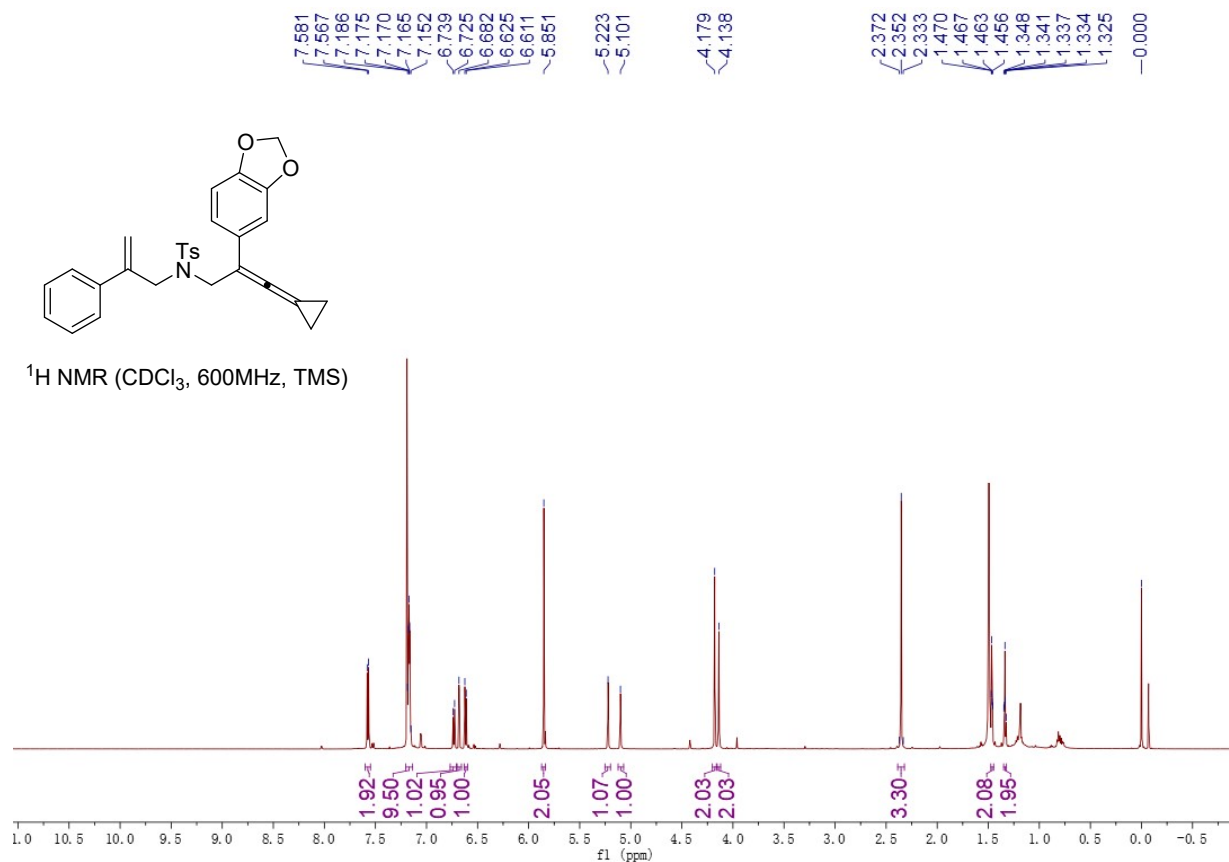

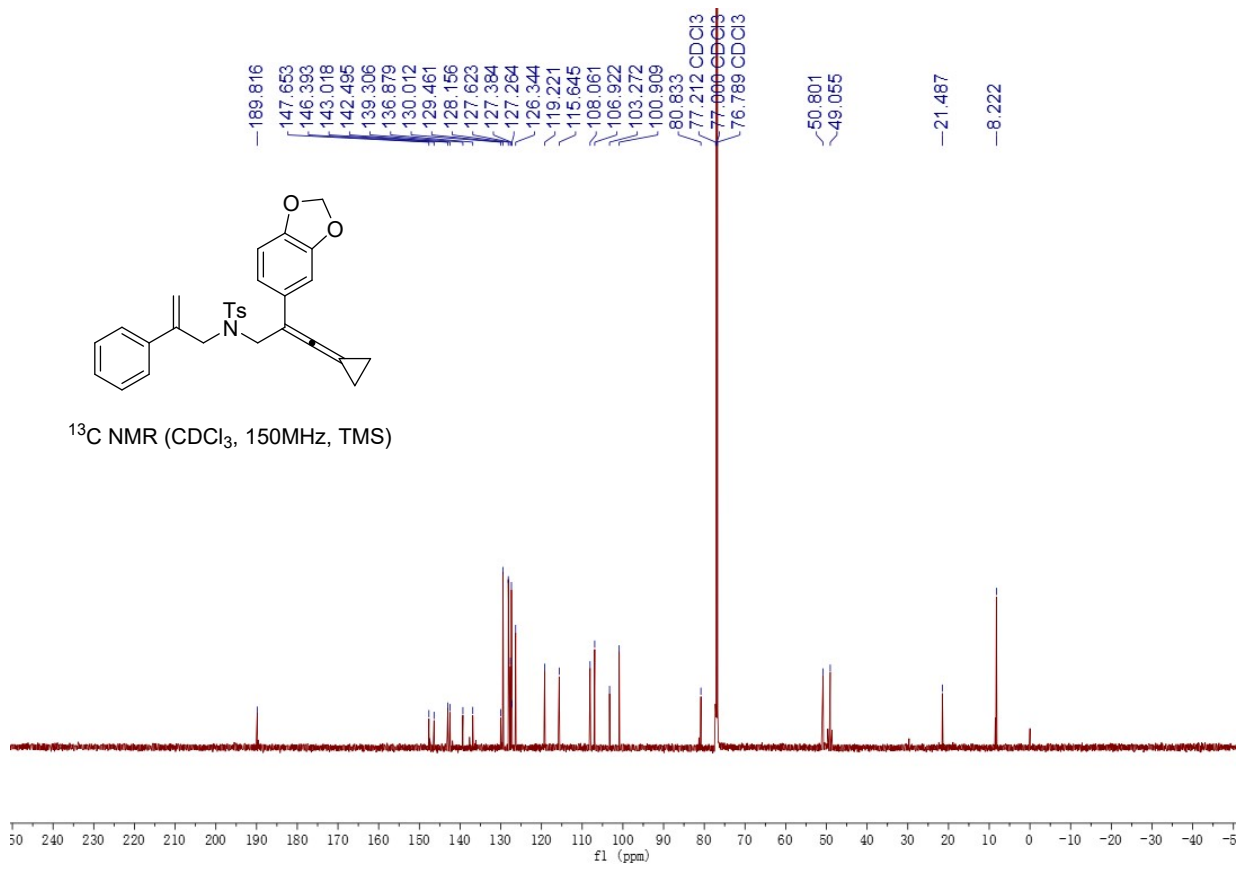

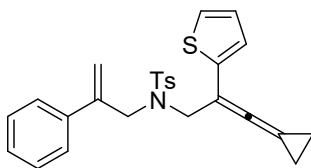

***N*-(3-cyclopropylidene-2-(thiophen-2-yl)-3λ<sup>5</sup>-allyl)-4-methyl-*N*-(2-phenylallyl)benzenesulfonamide (1k)**

A colorless oil, 48% yield, 214.8 mg. <sup>1</sup>H NMR (CDCl<sub>3</sub>, TMS, 600 MHz) δ 7.65 (d, *J* = 8.3 Hz, 2H), 7.26 - 7.22 (m, 7H), 7.12 (d, *J* = 5.1 Hz, 1H), 6.98 (d, *J* = 3.7 Hz, 1H), 6.91 (dd, *J* = 5.1, 3.7 Hz, 1H), 5.32 (s, 1H), 5.19 (s, 1H), 4.27 (s, 2H), 4.25 (s, 2H), 2.42 (s, 3H), 1.59 - 1.57 (m, 2H), 1.41 - 1.36 (m, 2H). <sup>13</sup>C NMR (CDCl<sub>3</sub>, TMS, 100 MHz) δ 188.8, 143.0, 139.2, 137.0, 129.5, 128.2, 127.7, 127.6, 127.3, 126.3, 124.1, 123.2, 120.0, 115.9, 99.5, 82.1, 50.8, 49.1, 21.5, 8.5. IR (Acetone) ν 1092, 1220, 1359, 1420, 1711, 3009 cm<sup>-1</sup>. HRMS (ESI) calcd. for C<sub>26</sub>H<sub>25</sub>NO<sub>2</sub>S<sub>2</sub>Na (M+Na): 470.1219, Found: 470.1221.

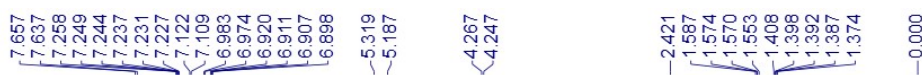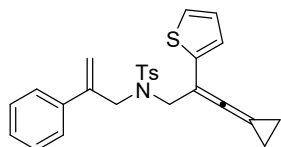

<sup>1</sup>H NMR (CDCl<sub>3</sub>, 400MHz, TMS)

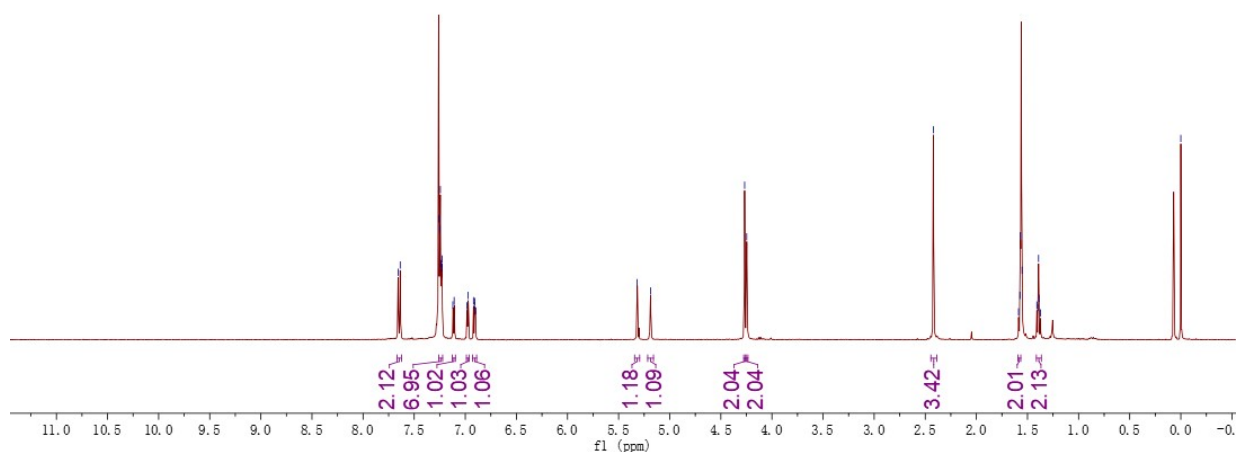

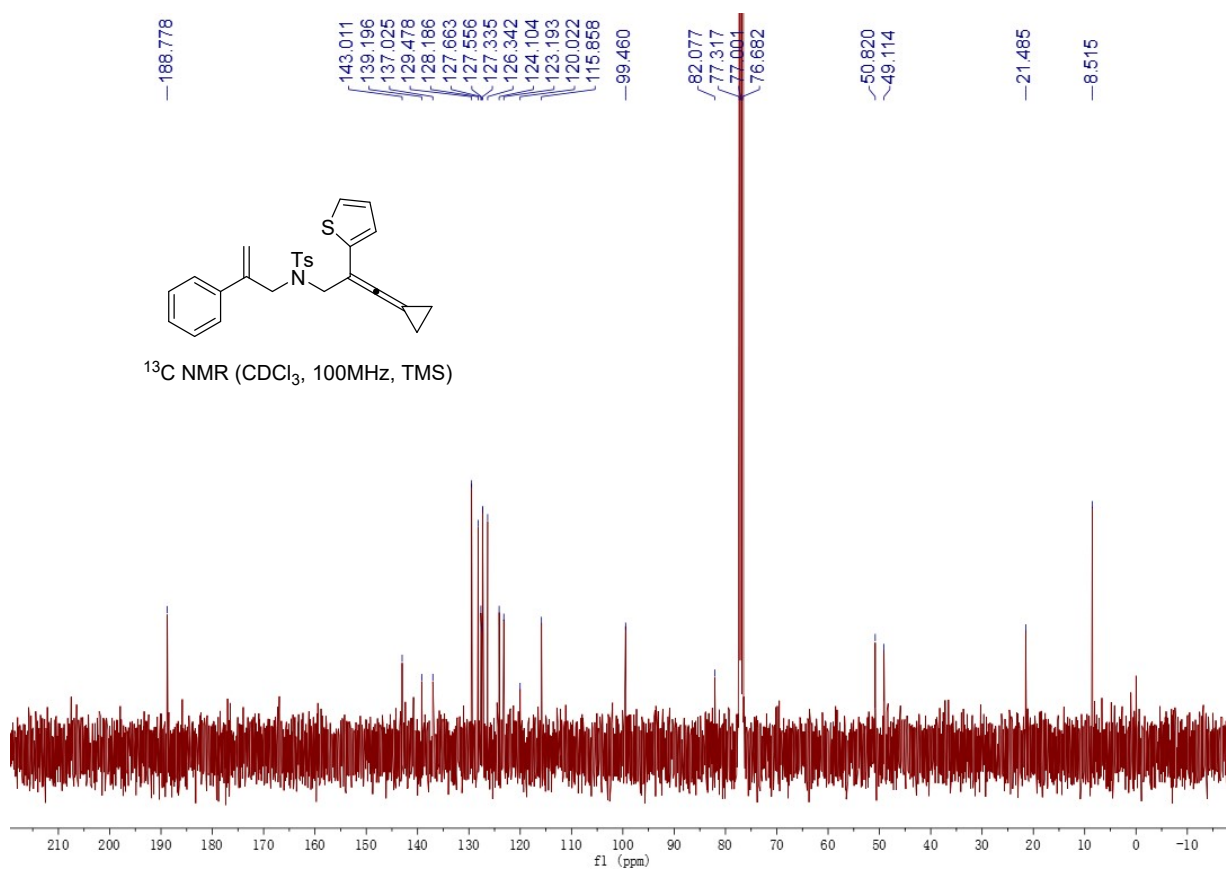

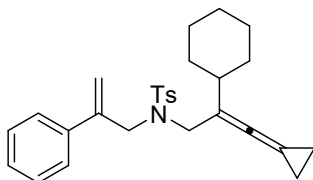

***N*-(2-cyclohexyl-3-cyclopropylidene-3 $\lambda^5$ -allyl)-4-methyl-*N*-(2-phenylallyl)benzenesulfonamide  
(1m)**

This is a known compound and its spectroscopic data are consistent with those reported in the previous literature,<sup>[8]</sup> 63% yield, 282.0 mg. <sup>1</sup>H NMR (400 MHz, CDCl<sub>3</sub>, TMS)  $\delta$  7.63 (d,  $J$  = 8.0 Hz, 2H), 7.34 (d,  $J$  = 7.6 Hz, 2H), 7.27 - 7.26 (m, 3H), 7.23 (d,  $J$  = 8.0 Hz, 2H), 5.39 (s, 1H), 5.24 (s, 1H), 4.25 (s, 2H), 3.84 (s, 2H), 2.41 (s, 3H), 1.67 - 1.58 (m, 5H), 1.39 - 1.36 (m, 2H), 1.28 - 1.24 (m, 2H), 1.15 - 0.88 (m, 6H). <sup>13</sup>C NMR (150 MHz, CDCl<sub>3</sub>)  $\delta$  187.8, 142.8, 142.7, 139.2, 137.4, 129.4, 128.2, 127.7, 127.3, 126.5, 115.8, 108.0, 79.7, 50.6, 48.8, 38.2, 32.1, 26.3, 26.2, 21.4, 6.9.

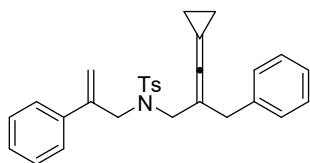

***N*-(2-benzyl-3-cyclopropylidene-3λ<sup>5</sup>-allyl)-4-methyl-*N*-(2-phenylallyl)benzenesulfonamide (1n)**

A colorless oil, 62% yield, 282.5 mg. <sup>1</sup>H NMR (CDCl<sub>3</sub>, TMS, 400 MHz) δ 7.52 (d, *J* = 8.3 Hz, 2H), 7.24 - 7.09 (m, 10H), 7.07 - 7.02 (m, 2H), 5.25 (s, 1H), 5.10 (s, 1H), 4.18 (s, 2H), 3.69 (s, 2H), 3.11 (s, 2H), 2.34 (s, 3H), 1.26 - 1.19 (m, 4H). <sup>13</sup>C NMR (CDCl<sub>3</sub>, TMS, 100 MHz) δ 189.5, 142.9, 142.7, 139.4, 139.0, 137.1, 129.4, 129.0, 128.2, 128.0, 127.7, 127.3, 126.5, 126.0, 116.1, 102.0, 79.2, 51.0, 49.8, 37.3, 21.5, 6.9. IR (Acetone) ν 1093, 1157, 1337, 1498, 2022, 2917 cm<sup>-1</sup>. HRMS (ESI) calcd. for C<sub>29</sub>H<sub>30</sub>NO<sub>2</sub>S (M+H): 456.1992, Found: 456.1959.

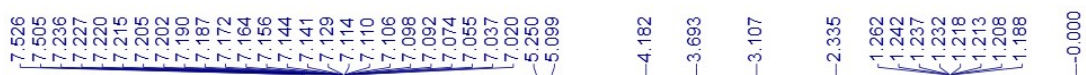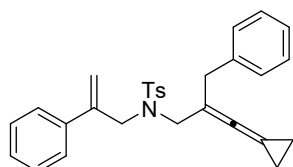

<sup>1</sup>H NMR (CDCl<sub>3</sub>, 400MHz, TMS)

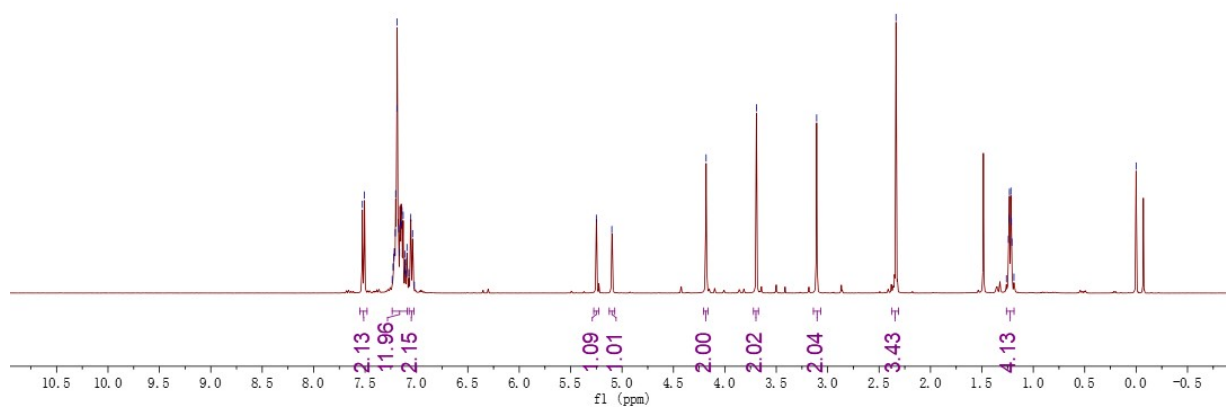

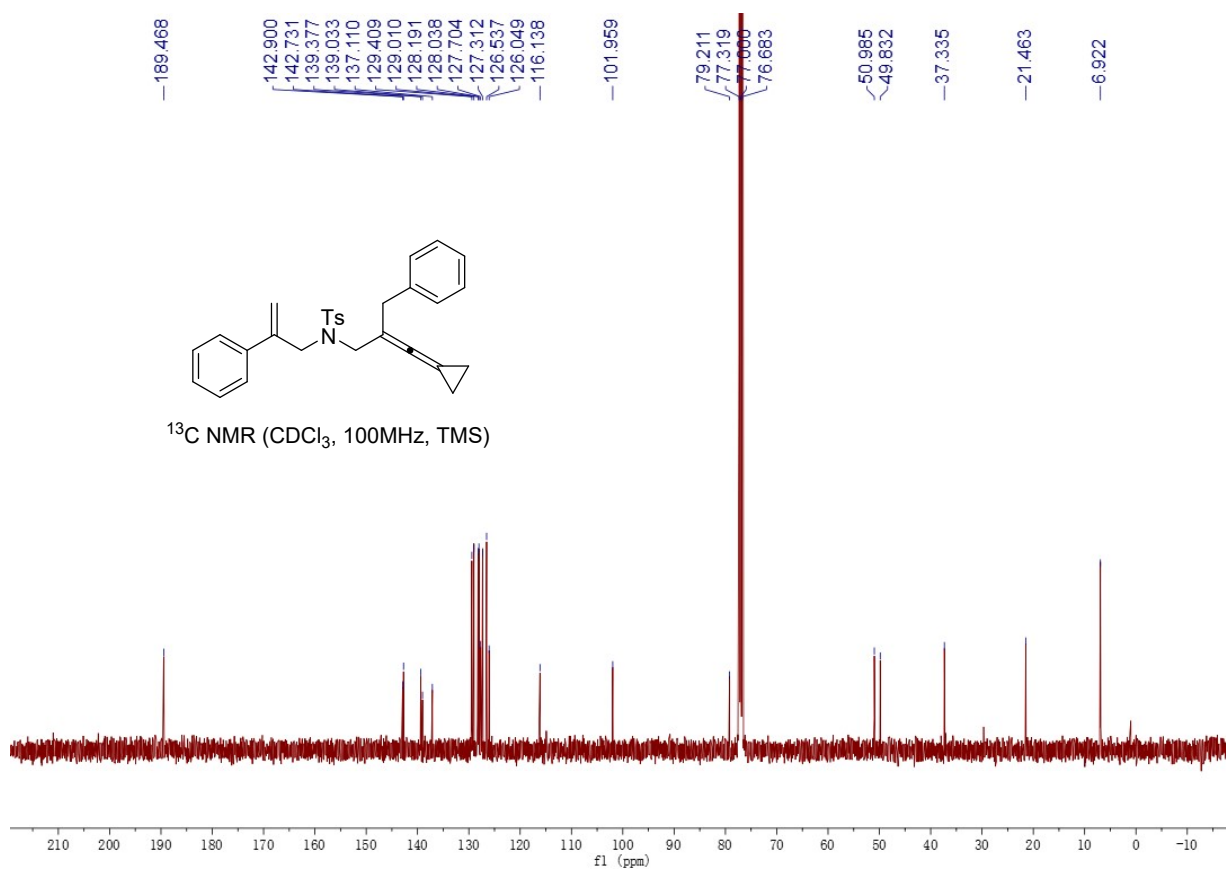



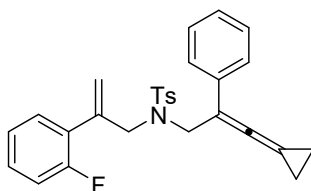

**N-(3-cyclopropylidene-2-phenyl-3 $\lambda$ <sup>5</sup>-allyl)-N-(2-(2-fluorophenyl)allyl)-4-methylbenzenesulfonamide (1o)**

A colorless oil, 55%, 252.8 mg. <sup>1</sup>H NMR (CDCl<sub>3</sub>, TMS, 400 MHz)  $\delta$  7.56 (d,  $J$  = 8.1 Hz, 2H), 7.28 (d,  $J$  = 7.0 Hz, 2H), 7.22 - 7.19 (m, 1H), 7.18 - 7.07 (m, 5H), 7.03 - 6.97 (m, 1H), 6.94 - 6.89 (m, 1H), 6.88 - 6.80 (m, 1H), 5.27 (s, 1H), 5.11 (s, 1H), 4.25 (s, 2H), 4.08 (s, 2H), 2.34 (s, 3H), 1.50 - 1.47 (m, 2H), 1.39 - 1.33 (m, 2H). <sup>13</sup>C NMR (CDCl<sub>3</sub>, TMS, 100 MHz)  $\delta$  190.3, 159.8 (d,  $J$  = 245.5 Hz), 142.9, 139.2, 136.7, 135.9, 130.2 (d,  $J$  = 4.5 Hz), 129.5, 129.1 (d,  $J$  = 8.1 Hz), 128.3, 127.8 (d,  $J$  = 14.5 Hz), 127.3, 126.5, 126.1, 123.9 (d,  $J$  = 3.3 Hz), 118.9, 115.5 (d,  $J$  = 22.3 Hz), 103.2, 80.6, 51.2, 49.2, 21.5, 8.4. <sup>19</sup>F NMR (CDCl<sub>3</sub>, TMS, 376 MHz)  $\delta$  -114.3 (s) IR (Acetone)  $\nu$  1159, 1339, 1488, 1709, 2009, 2985 cm<sup>-1</sup>. HRMS (ESI) calcd. for C<sub>28</sub>H<sub>27</sub>NO<sub>2</sub>SF (M+H): 460.1741, Found: 460.1709.

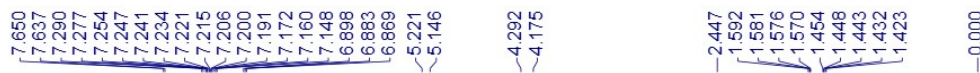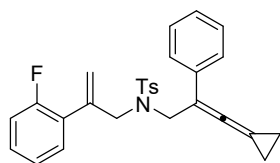

<sup>1</sup>H NMR (CDCl<sub>3</sub>, 400MHz, TMS)

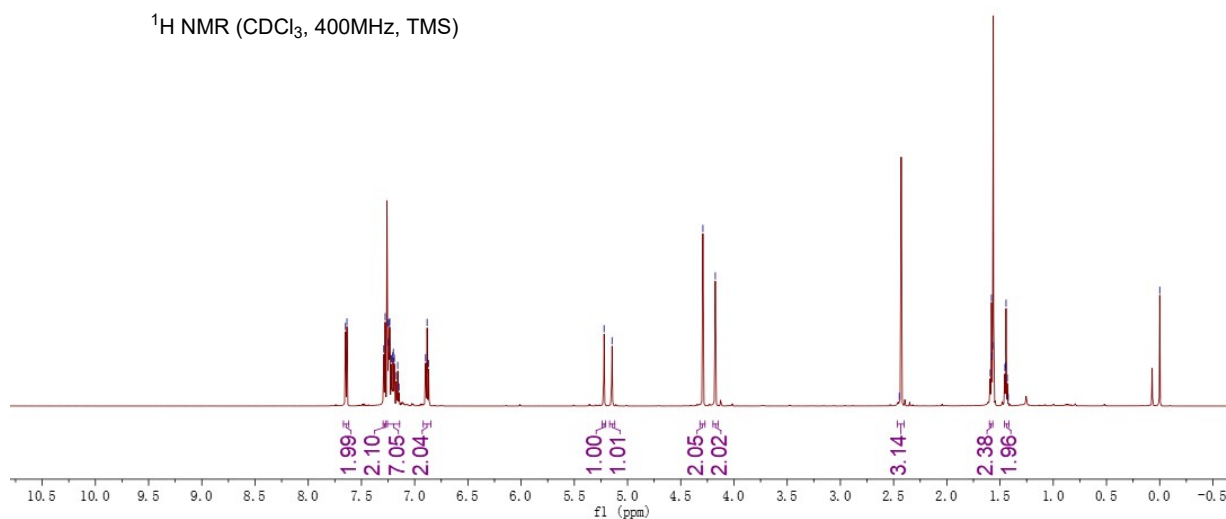

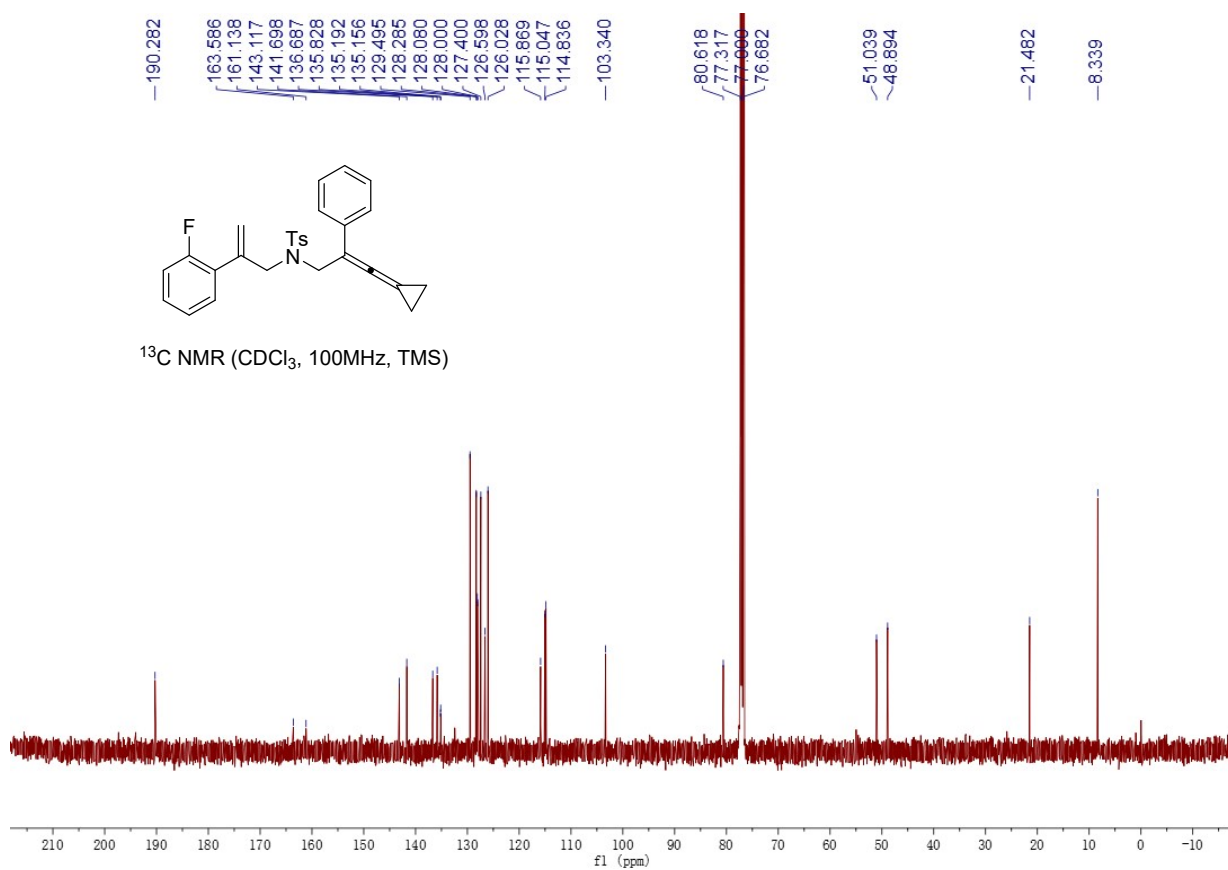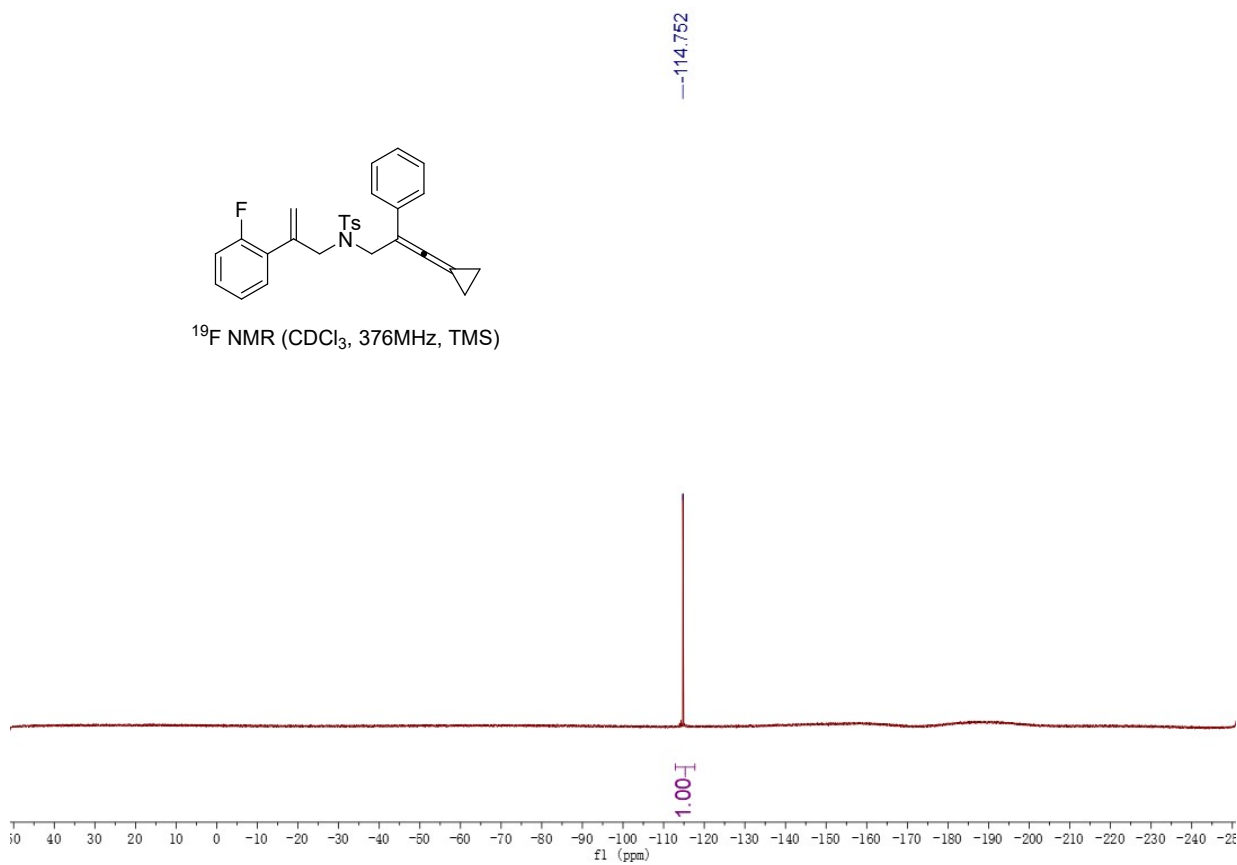

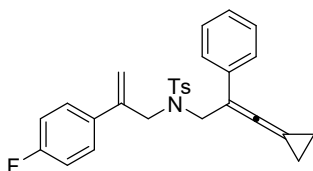

***N*-(3-cyclopropylidene-2-phenyl-3 $\lambda$ <sup>5</sup>-allyl)-*N*-(2-(4-fluorophenyl)allyl)-4-methylbenzenesulfonamide (1p)**

A colorless oil, 59%, 271.1 mg. <sup>1</sup>H NMR (CDCl<sub>3</sub>, TMS, 600 MHz)  $\delta$  7.64 (d,  $J$  = 8.0 Hz, 2H), 7.28 (d,  $J$  = 7.8 Hz, 2H), 7.26 - 7.14 (m, 7H), 6.88 (t,  $J$  = 8.6 Hz, 2H), 5.22 (s, 1H), 5.15 (s, 1H), 4.29 (s, 2H), 4.18 (s, 2H), 2.45 (s, 3H), 1.60 - 1.57 (m, 2H), 1.46 - 1.42 (m, 2H). <sup>13</sup>C NMR (CDCl<sub>3</sub>, TMS, 100 MHz)  $\delta$  190.3, 162.3 (d,  $J$  = 244.8 Hz), 143.1, 141.7, 136.7, 135.8, 135.2 (d,  $J$  = 3.6 Hz), 129.5, 128.3, 128.0 (d,  $J$  = 8.0 Hz), 127.4, 126.6, 126.0, 115.9, 114.9 (d,  $J$  = 21.1 Hz), 103.3, 80.6, 51.0, 48.9, 21.5, 8.3. <sup>19</sup>F NMR (CDCl<sub>3</sub>, TMS, 377 MHz)  $\delta$  -114.8 (s). IR (Acetone)  $\nu$  1092, 1220, 1359, 1420, 1711, 3009 cm<sup>-1</sup>. HRMS (ESI) calcd. for C<sub>28</sub>H<sub>27</sub>NO<sub>2</sub>FS (M+H): 460.1741, Found: 460.1712.

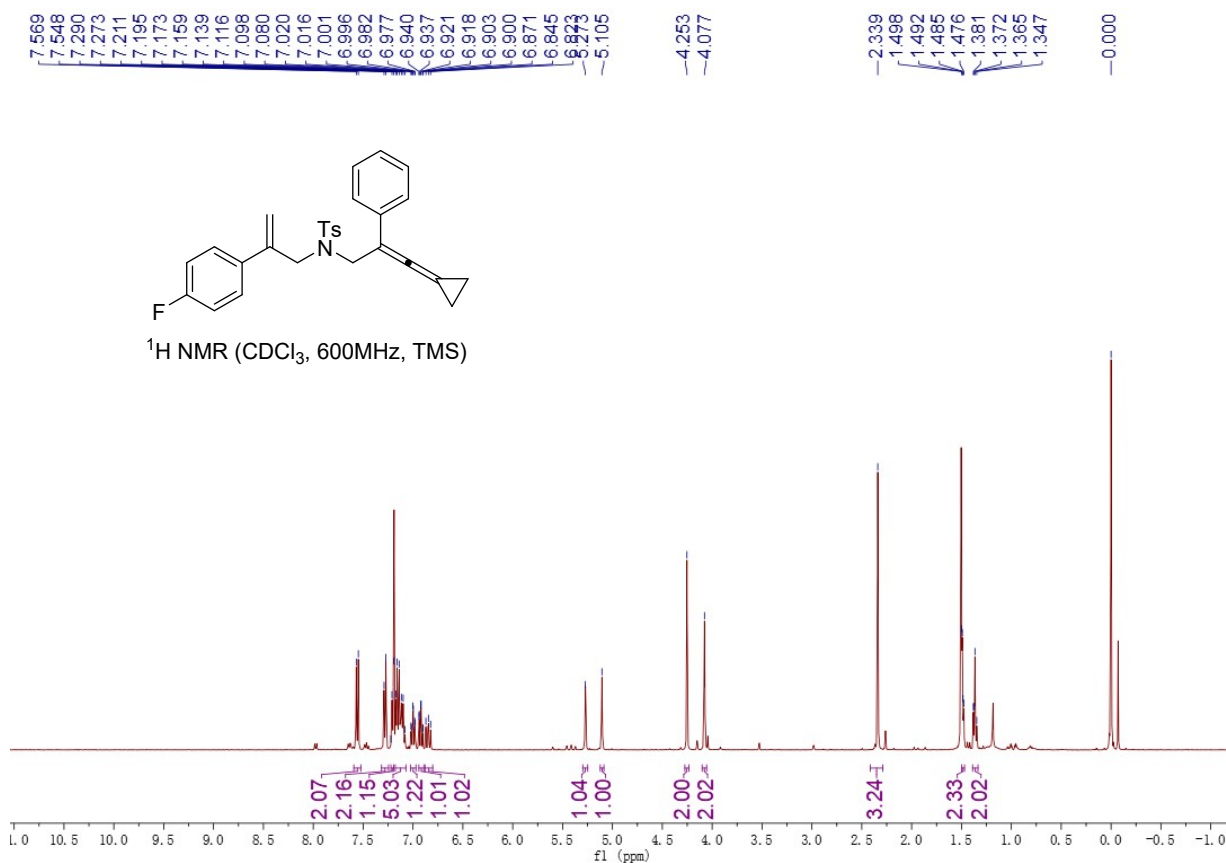

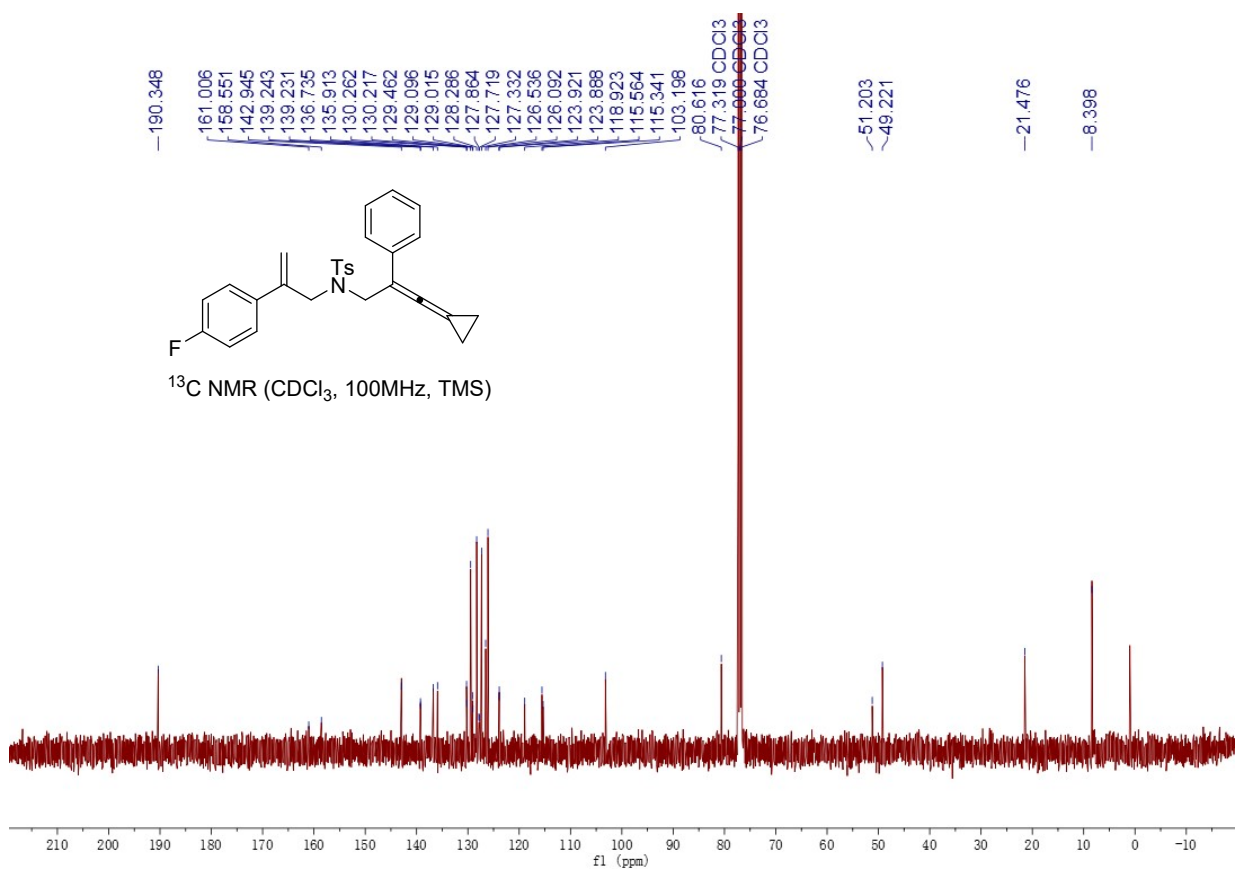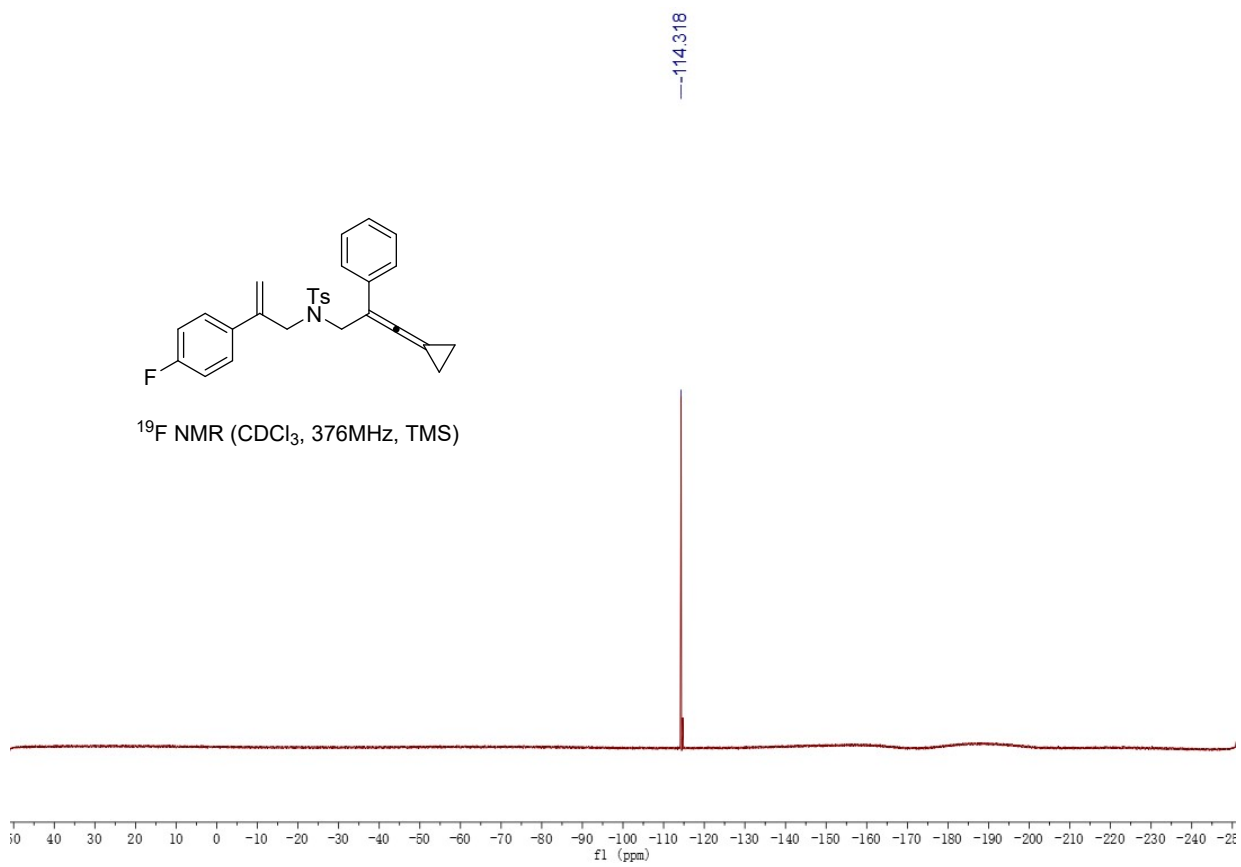

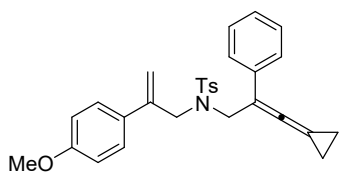

***N*-(3-cyclopropylidene-2-phenyl-3-allyl)-*N*-(2-(4-methoxyphenyl)allyl)-4-methylbenzenesulfonamide (1q)**

A colorless oil, 60% yield, 283.0 mg.  $^1\text{H}$  NMR ( $\text{CDCl}_3$ , TMS, 400 MHz)  $\delta$  7.64 (d,  $J = 8.1$  Hz, 2H), 7.30 - 7.13 (m, 9H), 6.75 (d,  $J = 8.7$  Hz, 2H), 5.22 (s, 1H), 5.07 (s, 1H), 4.31 (s, 2H), 4.20 (s, 2H), 3.79 (s, 3H), 2.42 (s, 3H), 1.59 - 1.53 (m, 2H), 1.46 - 1.41 (m, 2H).  $^{13}\text{C}$  NMR ( $\text{CDCl}_3$ , TMS, 150 MHz)  $\delta$  190.2, 159.2, 142.9, 141.8, 137.0, 131.6, 129.4, 128.2, 127.5, 127.4, 126.5, 126.1, 114.4, 113.5, 103.5, 80.8, 55.2, 50.8, 48.4, 21.5, 8.3. IR (Acetone)  $\nu$  1031, 1157, 1248, 1513, 1605, 2001, 2938  $\text{cm}^{-1}$ . HRMS (ESI) calcd. for  $\text{C}_{29}\text{H}_{30}\text{NO}_3\text{S}$  ( $\text{M}+\text{H}$ ): 472.1941, Found: 472.1907.

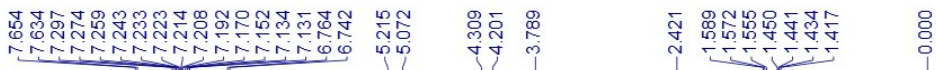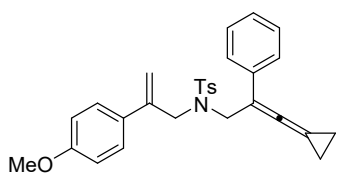

$^1\text{H}$  NMR ( $\text{CDCl}_3$ , 400MHz, TMS)

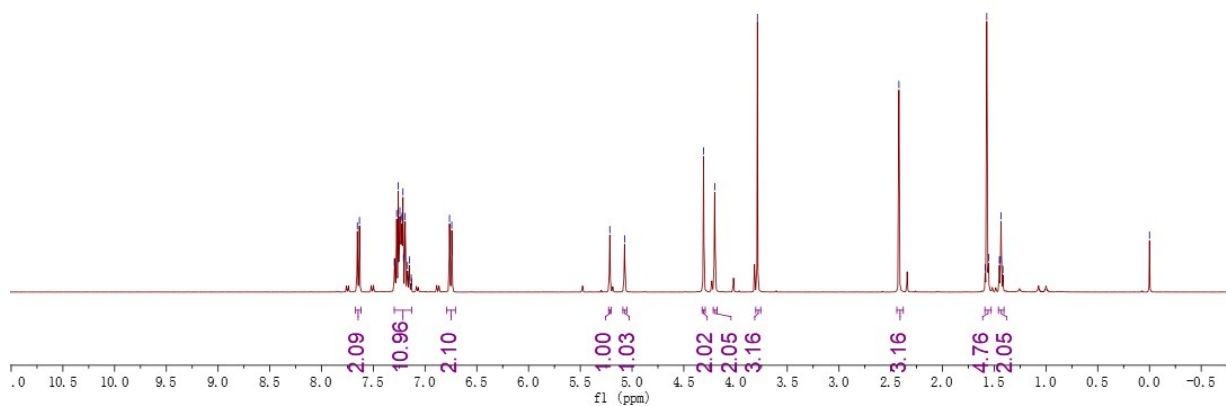

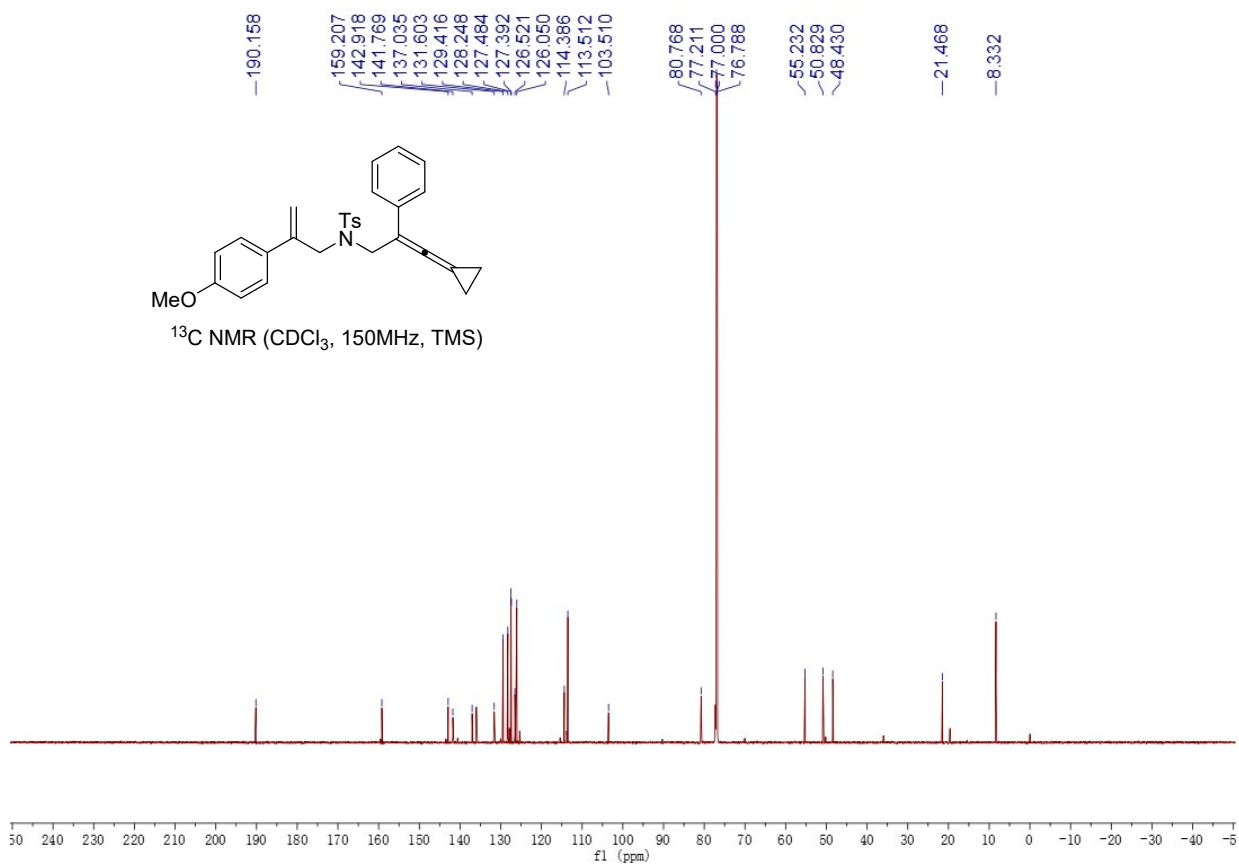

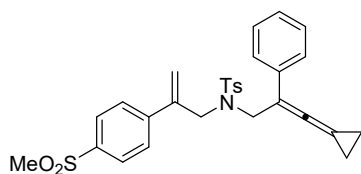

***N*-(3-cyclopropylidene-2-phenyl-3λ<sup>5</sup>-allyl)-4-methyl-*N*-(2-(4-methylsulfonyl)phenyl)allyl)benzenesulfonamide (1r)**

A colorless oil, 38% yield, 197.2 mg. <sup>1</sup>H NMR (CDCl<sub>3</sub>, TMS, 400 MHz) δ 7.72 (d, *J* = 8.4 Hz, 2H), 7.68 (d, *J* = 8.3 Hz, 2H), 7.40 (d, *J* = 8.4 Hz, 2H), 7.31 - 7.28 (m, 4H), 7.23 - 7.20 (m, 2H), 7.17 - 7.12 (m, 1H), 5.35 (s, 1H), 5.32 (s, 1H), 4.25 (s, 2H), 4.18 (s, 2H), 3.02 (s, 3H), 2.45 (s, 3H), 1.61 - 1.59 (m, 2H), 1.49 - 1.43 (m, 2H). <sup>13</sup>C NMR (CDCl<sub>3</sub>, TMS, 100 MHz) δ 190.6, 144.6, 143.5, 142.0, 139.2, 135.7, 135.6, 129.7, 128.3, 127.5, 127.4, 127.1, 126.6, 126.0, 118.6, 103.0, 80.3, 51.3, 50.1, 44.5, 21.5, 8.3 cm<sup>-1</sup>. IR (Acetone) ν 1026, 1139, 1234, 1553, 1670, 2013, 2905 cm<sup>-1</sup>. HRMS (ESI) calcd. for C<sub>29</sub>H<sub>30</sub>NO<sub>4</sub>S<sub>2</sub> (M+H): 520.1611, Found: 520.1580.

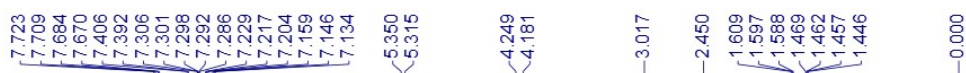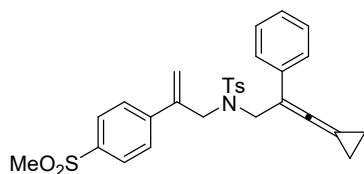

<sup>1</sup>H NMR (CDCl<sub>3</sub>, 600 Hz, TMS)

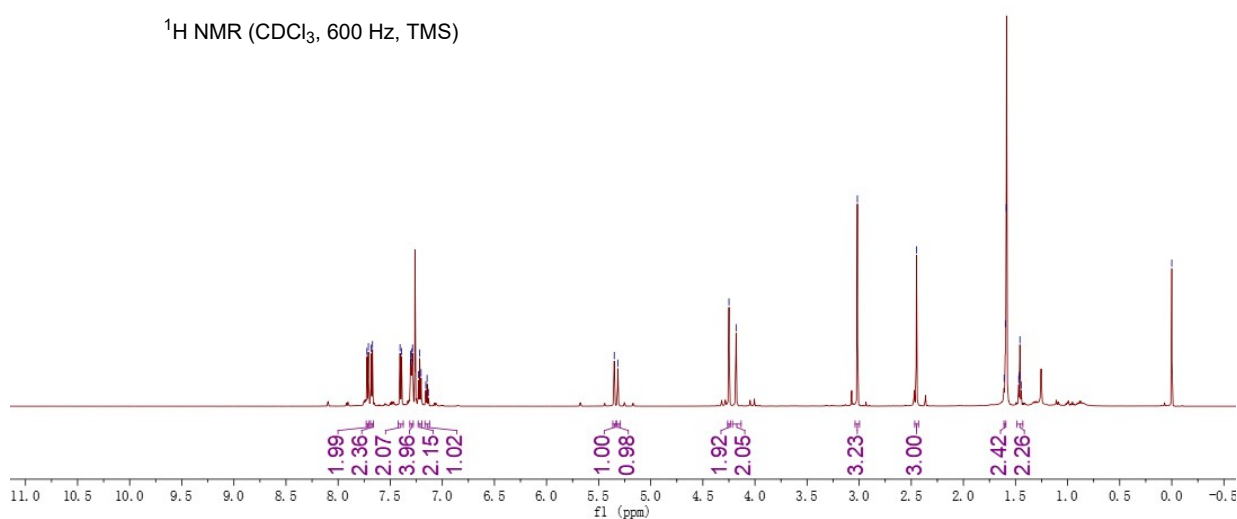

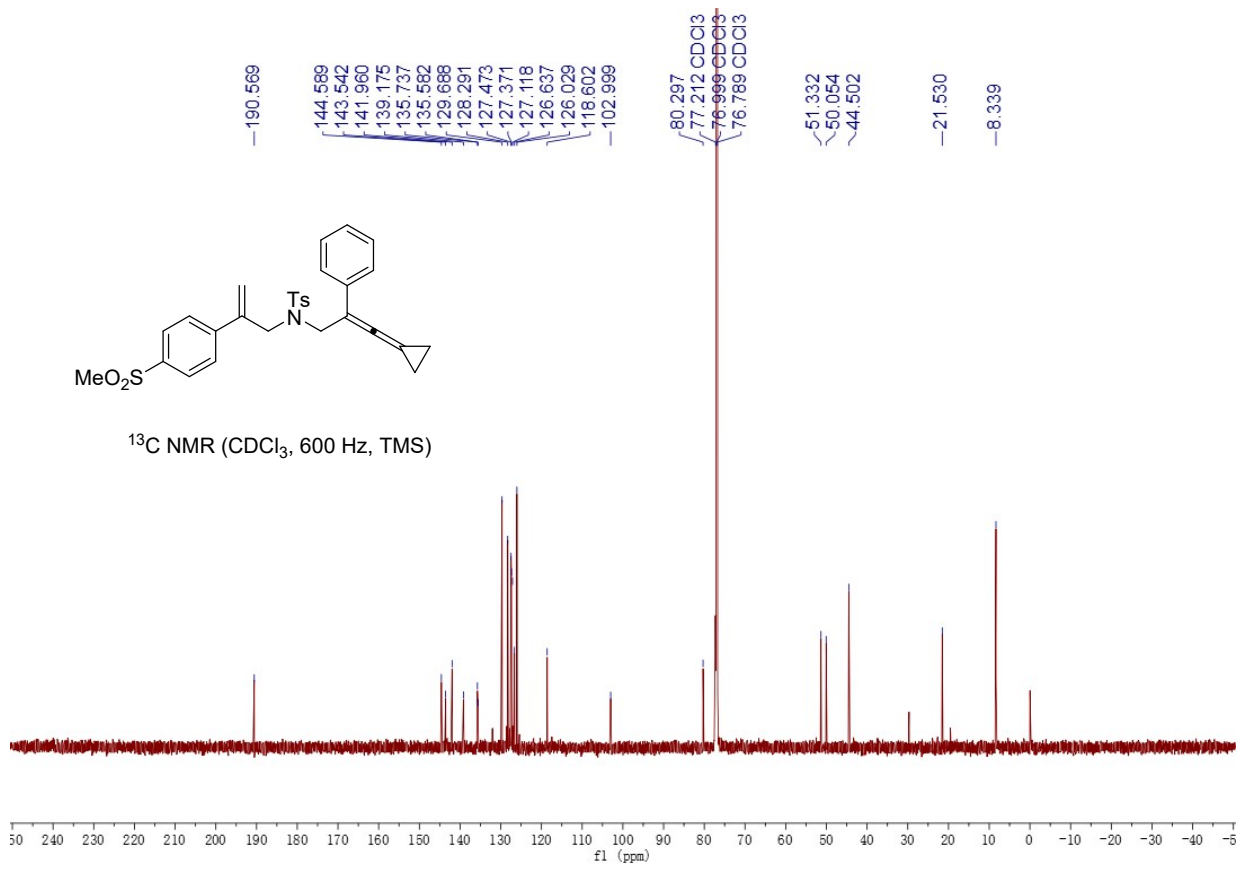



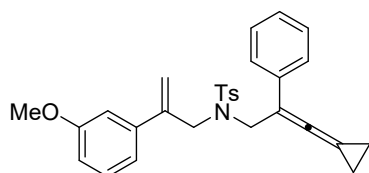

***N*-(3-cyclopropylidene-2-phenyl-3-allyl)-*N*-(2-(3-methoxyphenyl)allyl)-4-methylbenzenesulfonamide (1s)**

A colorless oil, 41% yield, 193.4 mg.  $^1\text{H}$  NMR ( $\text{CDCl}_3$ , TMS, 600 MHz)  $\delta$  7.64 (d,  $J = 8.3$  Hz, 2H), 7.30 (d,  $J = 7.1$  Hz, 2H), 7.25 - 7.21 (m, 4H), 7.17 - 7.12 (m, 2H), 6.86 - 6.77 (m, 3H), 5.28 (s, 1H), 5.16 (s, 1H), 4.32 (s, 2H), 4.21 (s, 2H), 3.77 (s, 3H), 2.42 (s, 3H), 1.58 - 1.54 (m, 2H), 1.46 - 1.40 (m, 2H).  $^{13}\text{C}$  NMR ( $\text{CDCl}_3$ , TMS, 150 MHz)  $\delta$  190.3, 159.4, 143.0, 142.4, 137.0, 136.0, 129.5, 129.1, 128.3, 127.4, 126.6, 126.1, 118.8, 115.9, 113.2, 112.2, 103.4, 55.2, 50.8, 48.7, 21.5, 8.4. IR (Acetone)  $\nu$  1035, 1161, 1254, 1523, 1612, 2031, 2935  $\text{cm}^{-1}$ . HRMS (ESI) calcd. for  $\text{C}_{29}\text{H}_{30}\text{NO}_3\text{S}$  (M+H): 472.1941, Found: 472.1911.

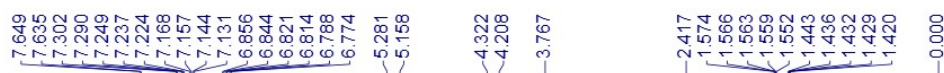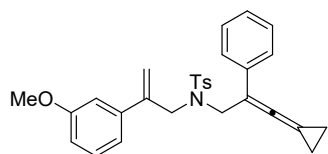

$^1\text{H}$  NMR ( $\text{CDCl}_3$ , 600MHz, TMS)

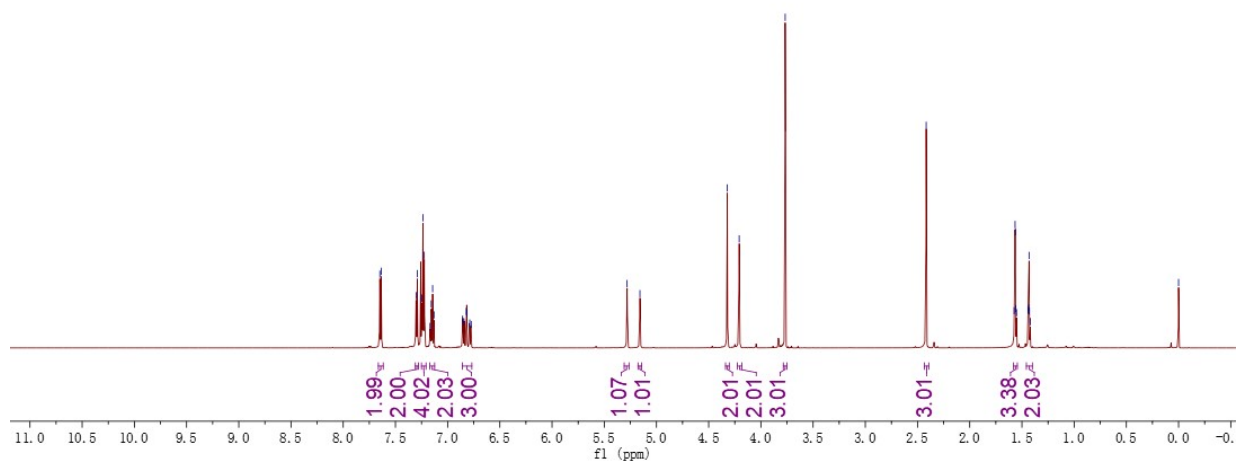

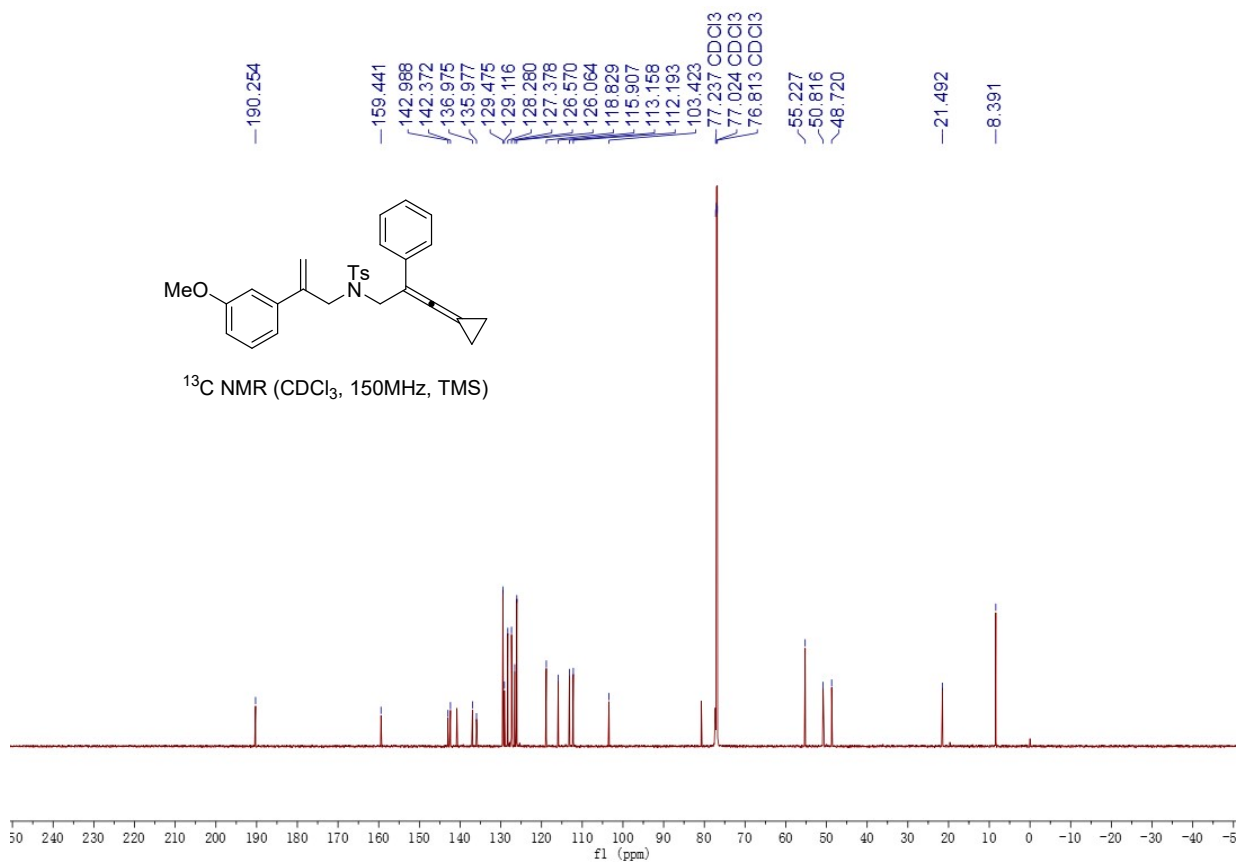

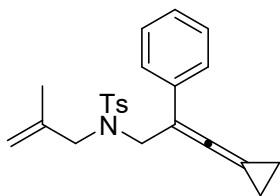

***N*-(3-cyclopropylidene-2-phenyl-3-allyl)-4-methyl-*N*-(2-methylallyl)benzenesulfonamide (1t)**

A colorless oil, 65% yield, 246.7 mg.  $^1\text{H}$  NMR ( $\text{CDCl}_3$ , TMS, 600 MHz)  $\delta$  7.68 (d,  $J = 8.4$  Hz, 2H), 7.33 (d,  $J = 8.1$  Hz, 2H), 7.27 - 7.24 (m, 4H), 7.19 - 7.15 (m, 1H), 4.79 (s, 2H), 4.31 (s, 2H), 3.72 (s, 2H), 2.42 (s, 3H), 1.64 - 1.60 (m, 2H), 1.55 (s, 3H), 1.53 - 1.48 (m, 2H).  $^{13}\text{C}$  NMR ( $\text{CDCl}_3$ , TMS, 150 MHz)  $\delta$  190.3, 142.9, 140.4, 137.1, 135.9, 129.4, 128.3, 127.3, 126.6, 126.2, 113.8, 103.5, 80.4, 53.2, 48.6, 21.5, 20.0, 8.3. IR (Acetone)  $\nu$  1159, 1221, 1359, 1710, 2009, 3001  $\text{cm}^{-1}$ . HRMS (ESI) calcd. for  $\text{C}_{23}\text{H}_{26}\text{NO}_2\text{S}$  (M+H): 380.1679, Found: 380.1653.

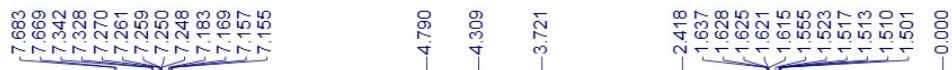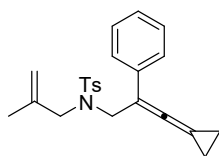

$^1\text{H}$  NMR ( $\text{CDCl}_3$ , 600MHz, TMS)

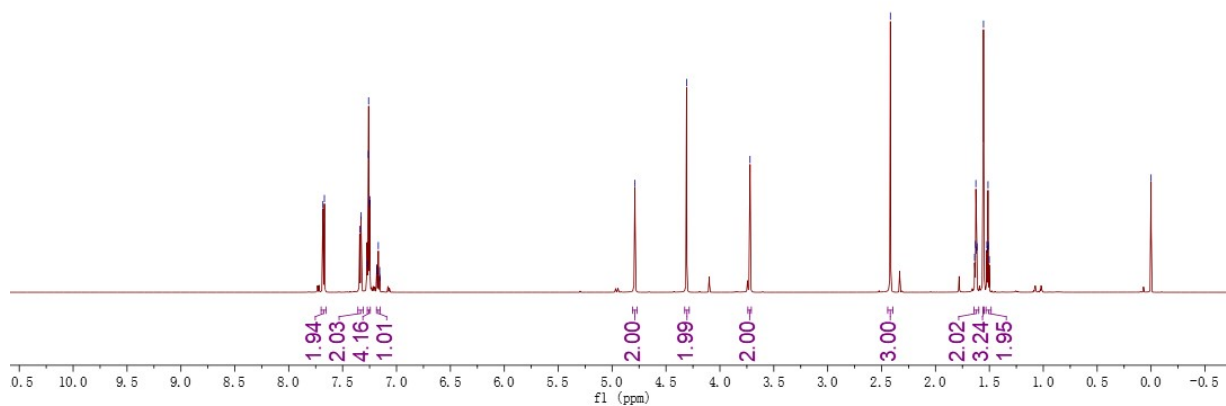

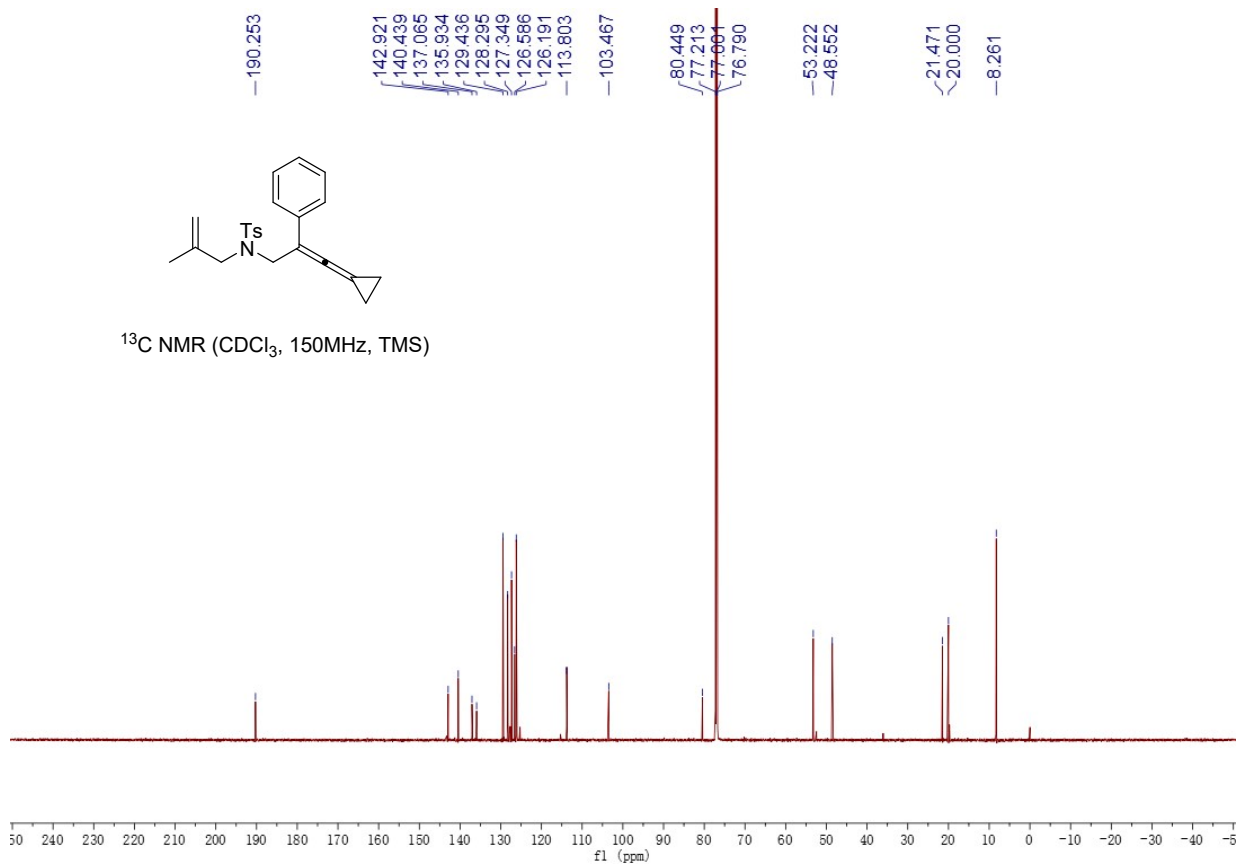

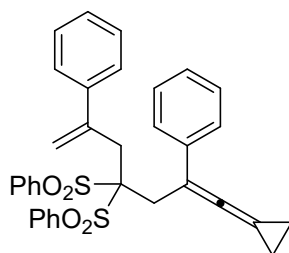

**(1-cyclopropylidene-2,6-diphenyl-1λ<sup>5</sup>-hepta-1,6-diene-4,4-diyl)disulfonyl)dibenzene (1v)**

A colorless oil, 41% yield, 149.9 mg. <sup>1</sup>H NMR (CDCl<sub>3</sub>, TMS, 400 MHz) δ 7.98 - 7.92 (m, 4H), 7.64 - 7.58 (m, 2H), 7.45 - 7.40 (m, 4H), 7.35 - 7.23 (m, 7H), 7.20 - 7.13 (m, 3H), 5.67 (s, 1H), 5.48 (s, 1H), 3.69 (s, 2H), 3.58 (s, 2H), 1.50 - 1.43 (m, 2H), 1.30 - 1.26 (m, 2H). <sup>13</sup>C NMR (CDCl<sub>3</sub>, TMS, 150 MHz) δ 191.2, 142.8, 141.1, 138.3, 137.7, 134.2, 131.6, 128.4, 128.3, 128.1, 127.5, 126.8, 126.7, 125.9, 119.7, 100.8, 94.4, 82.7, 32.3, 29.2, 8.8. IR (Acetone) ν 909, 1073, 1145, 1328, 1446, 1493, 2915 cm<sup>-1</sup>. HRMS (ESI) calcd. for C<sub>34</sub>H<sub>31</sub>O<sub>4</sub>S<sub>2</sub> (M+H): 567.1658, Found: 567.1625.

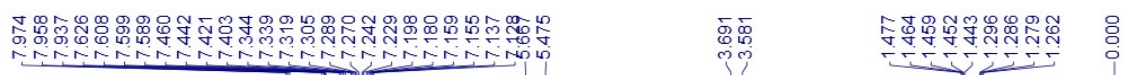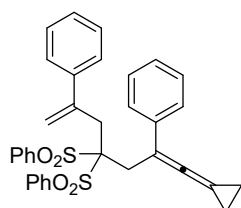

<sup>1</sup>H NMR (CDCl<sub>3</sub>, 400MHz, TMS)

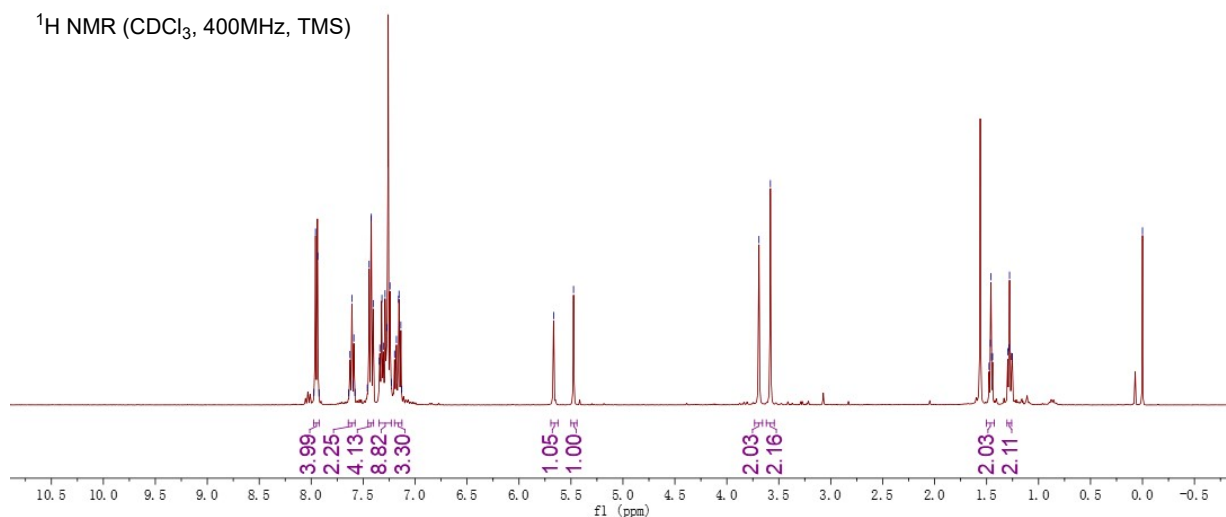

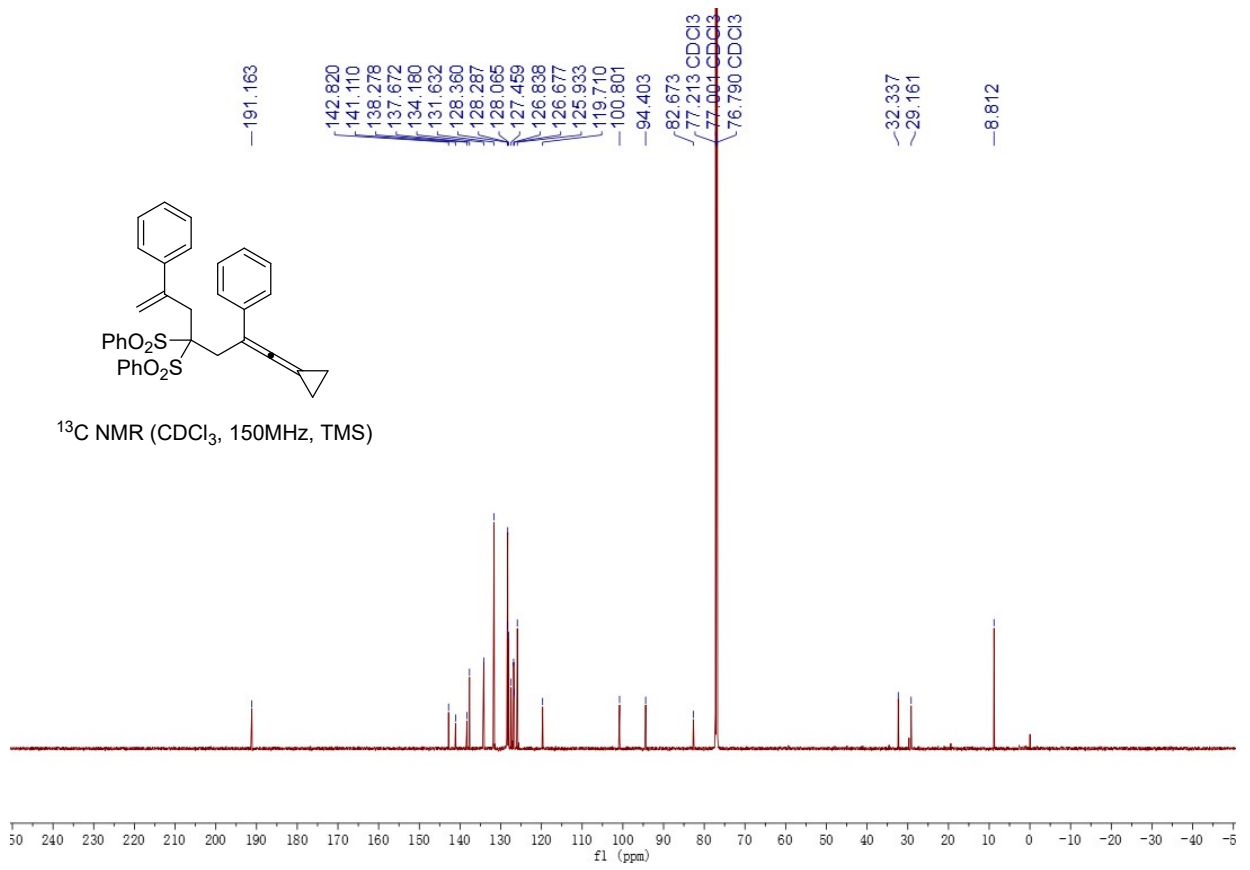

## 9. Spectroscopic data of products 3, 4, 5, and 6

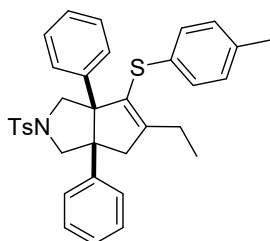

### 5-ethyl-3a,6a-diphenyl-6-(phenylthio)-2-tosyl-1,2,3,3a,4,6a-hexahydrocyclopenta[*c*]pyrrole

#### (3aa)

A colorless oil, 44.1 mg, 73% yield.  $^1\text{H}$  NMR ( $\text{CDCl}_3$ , TMS, 600 MHz)  $\delta$  7.74 (d,  $J = 8.2$  Hz, 2H), 7.32 (d,  $J = 8.0$  Hz, 2H), 6.98 - 6.84 (m, 10H), 6.76 - 6.72 (m, 4H), 4.18 (d,  $J = 10.2$  Hz, 1H), 3.95 (dd,  $J = 10.1, 3.3$  Hz, 2H), 3.45 (d,  $J = 9.9$  Hz, 1H), 3.30 (d,  $J = 16.9$  Hz, 1H), 2.74 (d,  $J = 16.9$  Hz, 1H), 2.47 (s, 3H), 2.38 - 2.20 (m, 5H), 0.97 (t,  $J = 7.6$  Hz, 3H).  $^{13}\text{C}$  NMR ( $\text{CDCl}_3$ , TMS, 150 MHz)  $\delta$  151.8, 143.4, 142.5, 139.7, 135.3, 133.4, 132.5, 132.0, 129.7, 129.5, 128.2, 127.8, 127.74, 127.67, 127.3, 126.9, 126.4, 126.0, 71.3, 63.3, 59.0, 55.9, 45.0, 23.7, 21.6, 20.9, 11.5. IR (Acetone)  $\nu$  1030, 1100, 1159, 1255, 1335, 1511, 2954  $\text{cm}^{-1}$ . HRMS (ESI) calcd. for  $\text{C}_{35}\text{H}_{35}\text{NO}_2\text{S}_2\text{Na}$  ( $\text{M}+\text{Na}$ ): 588.2001, Found: 588.1999.

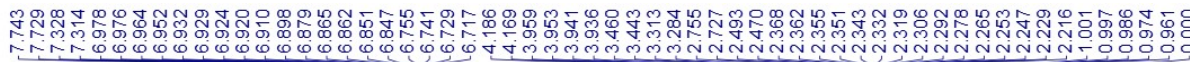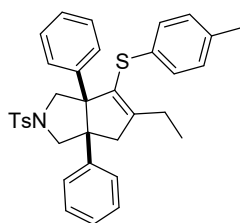

$^1\text{H}$  NMR ( $\text{CDCl}_3$ , 600MHz, TMS)

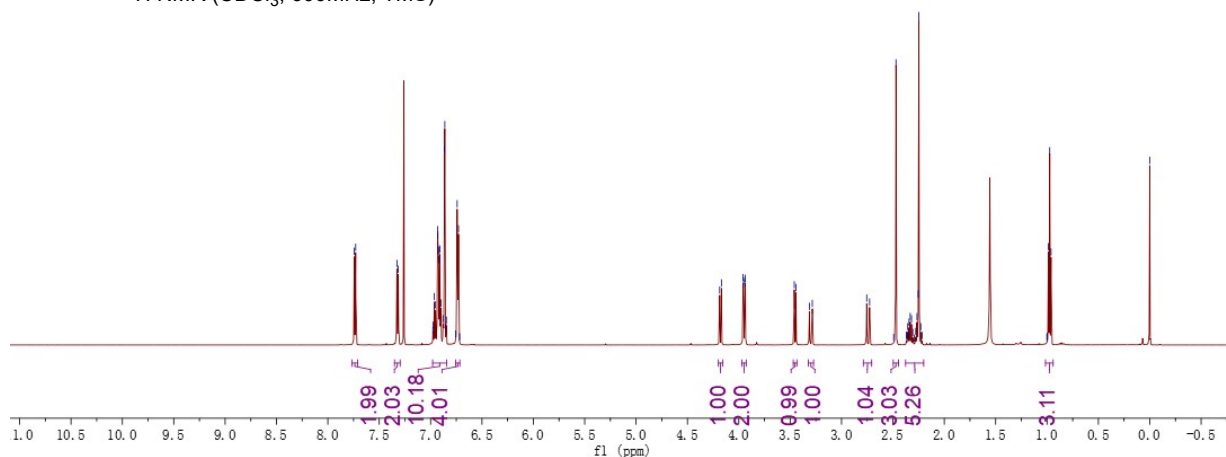

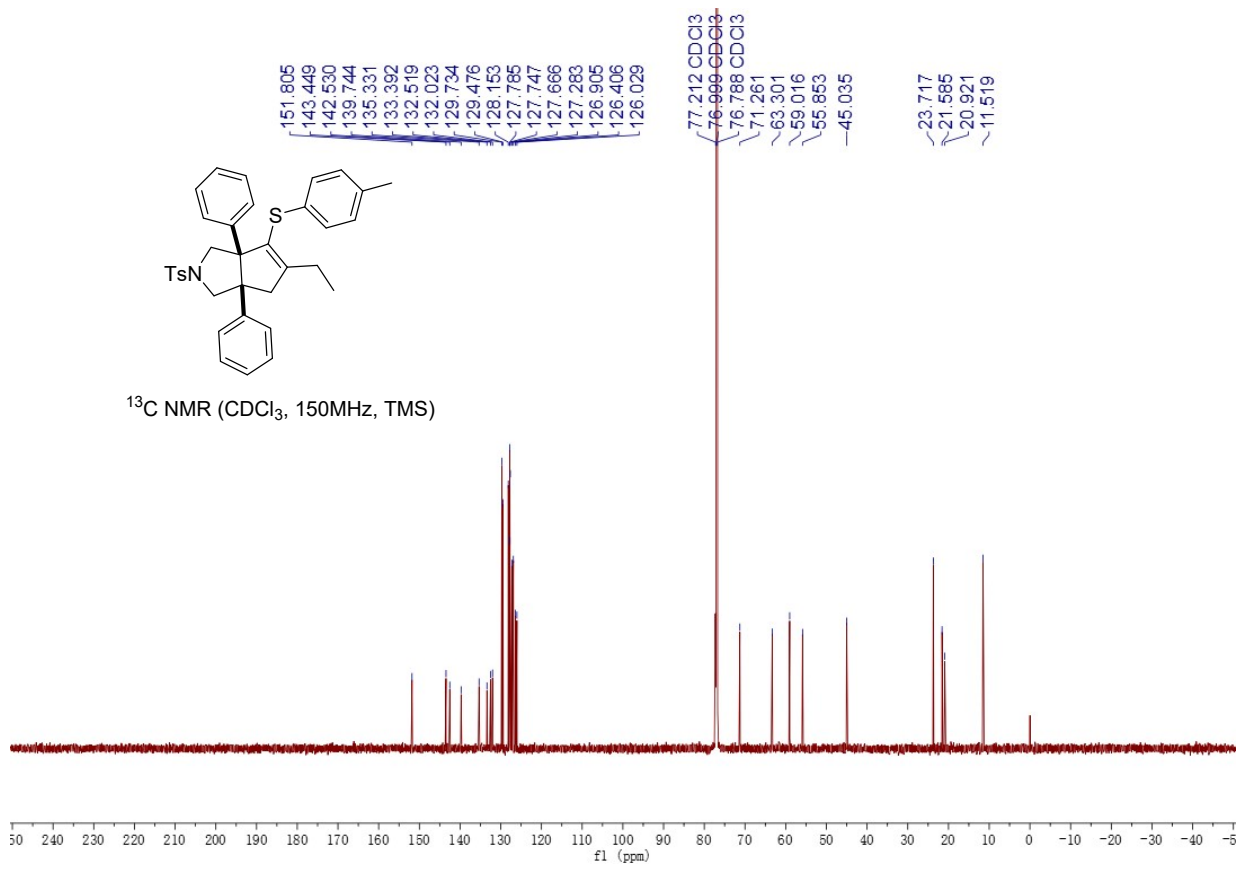



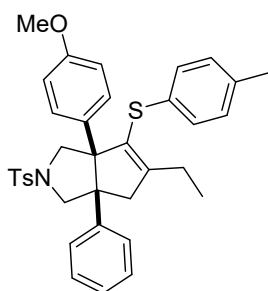

**5-ethyl-6a-(4-methoxyphenyl)-3a-phenyl-6-(*p*-tolylthio)-2-tosyl-1,2,3,3a,4,6a-hexahydrocyclopenta[*c*]pyrrole (3ba)**

A colorless oil, 41.7 mg, 70% yield.  $^1\text{H}$  NMR ( $\text{CDCl}_3$ , TMS, 600 MHz)  $\delta$  7.73 (d,  $J = 8.2$  Hz, 2H), 7.32 (d,  $J = 7.9$  Hz, 2H), 6.99 - 6.85 (m, 7H), 6.73 (d,  $J = 7.7$  Hz, 2H), 6.63 (d,  $J = 8.8$  Hz, 2H), 6.45 (d,  $J = 8.9$  Hz, 2H), 4.17 (d,  $J = 10.3$  Hz, 1H), 3.92 (dd,  $J = 16.6, 10.1$  Hz, 2H), 3.63 (s, 3H), 3.45 (d,  $J = 10.0$  Hz, 1H), 3.27 (d,  $J = 16.8$  Hz, 1H), 2.72 (d,  $J = 16.8$  Hz, 1H), 2.47 (s, 3H), 2.36 - 2.22 (m, 5H), 0.97 (t,  $J = 7.6$  Hz, 3H).  $^{13}\text{C}$  NMR ( $\text{CDCl}_3$ , TMS, 150 MHz)  $\delta$  158.0, 151.6, 143.4, 142.6, 135.2, 133.5, 132.7, 132.1, 131.6, 129.7, 129.4, 128.3, 128.2, 127.8, 127.7, 126.9, 126.0, 113.0, 70.7, 63.3, 58.8, 55.8, 55.0, 44.8, 23.7, 21.6, 20.9, 11.5. IR (Acetone)  $\nu$  1043, 1120, 1139, 1245, 1331, 1501, 2974  $\text{cm}^{-1}$ . HRMS (ESI) calcd. for  $\text{C}_{36}\text{H}_{37}\text{O}_3\text{NS}_2\text{Na}$  ( $\text{M}+\text{Na}$ ): 618.2107, Found: 618.2103.

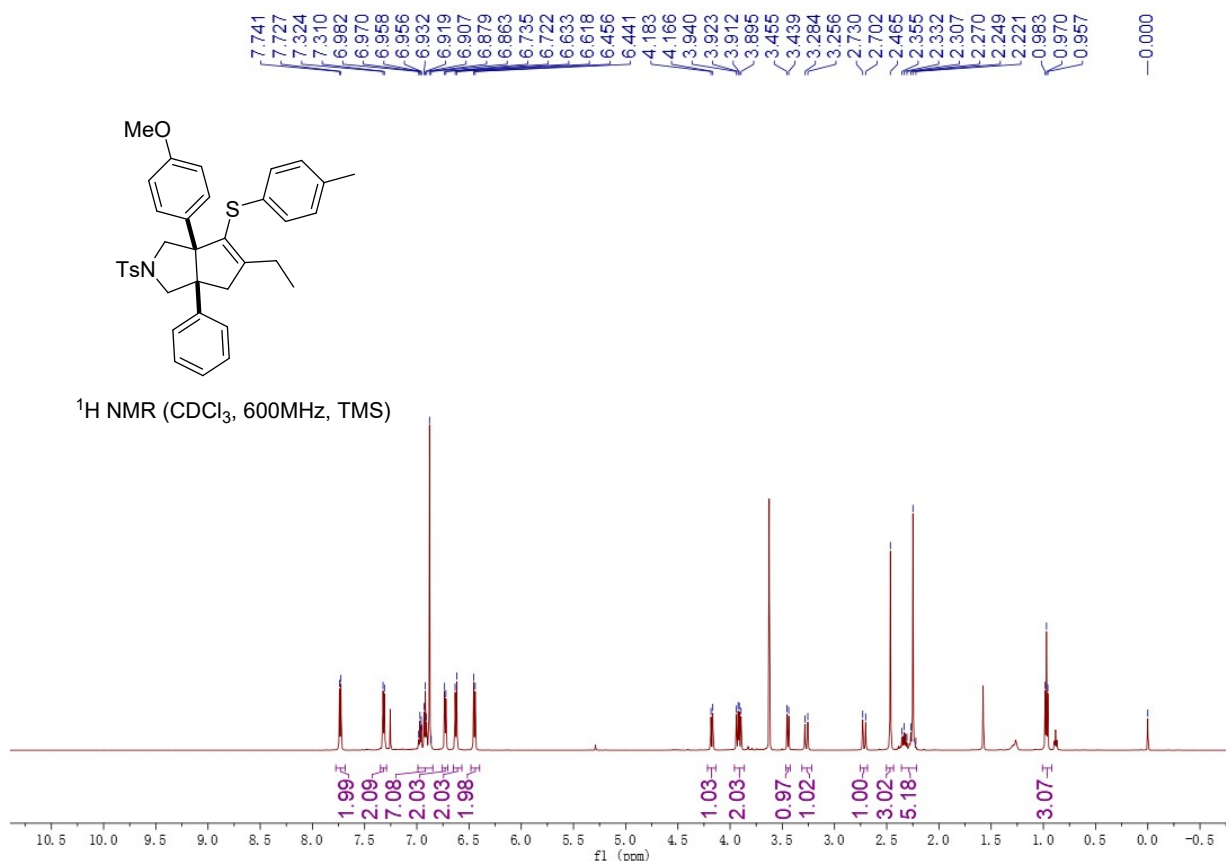

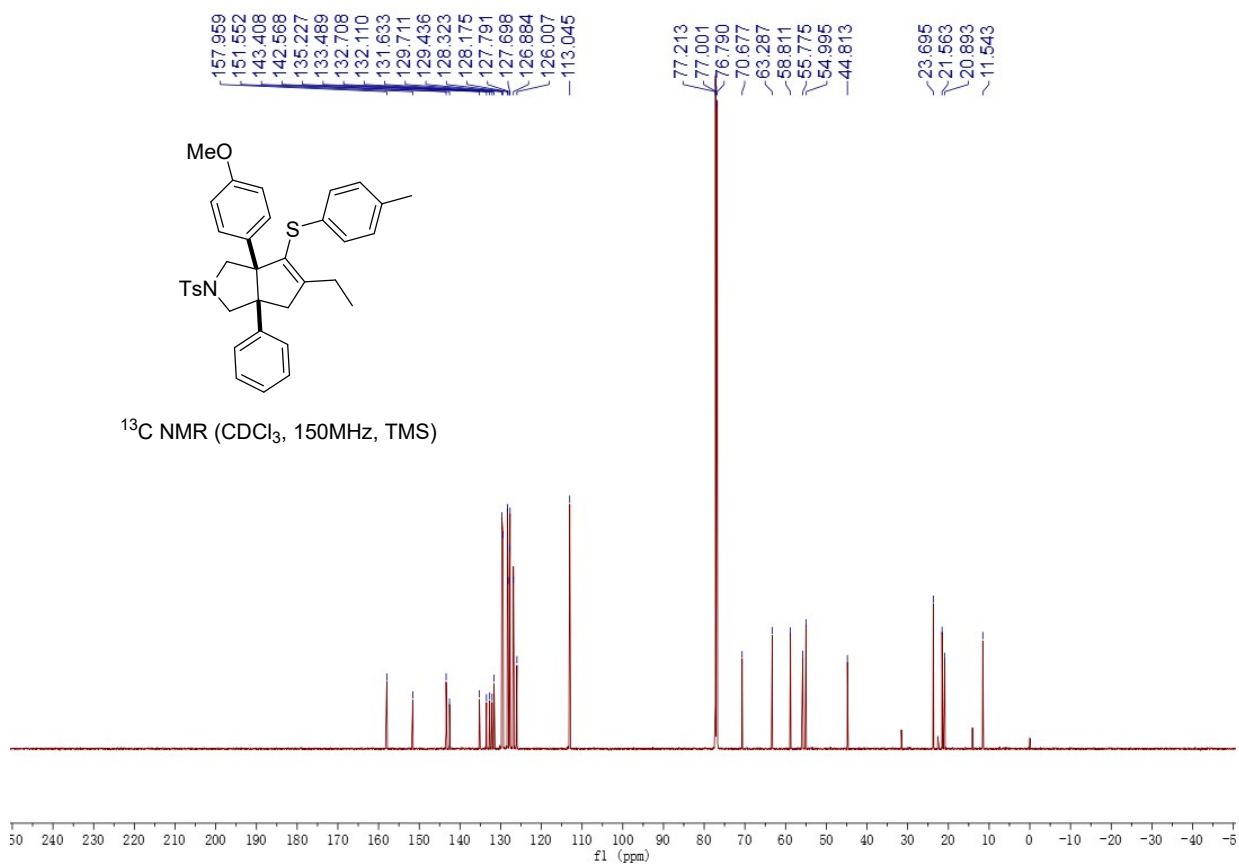

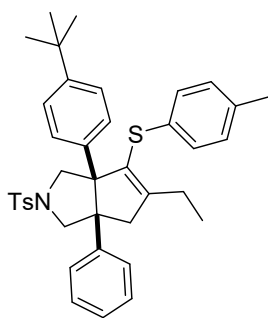

**6a-(4-(*tert*-butyl)phenyl)-5-ethyl-3a-phenyl-6-(*p*-tolylthio)-2-tosyl-1,2,3,3a,4,6a-hexahydrocyclopenta[*c*]pyrrole (3ca)**

A colorless oil, 37.3 mg, 60% yield.  $^1\text{H}$  NMR ( $\text{CDCl}_3$ , TMS, 600 MHz)  $\delta$  7.73 (d,  $J = 8.2$  Hz, 2H), 7.31 (d,  $J = 8.0$  Hz, 2H), 6.99 - 6.87 (m, 5H), 6.84 - 6.78 (m, 4H), 6.73 (d,  $J = 7.8$  Hz, 2H), 6.63 (d,  $J = 8.5$  Hz, 2H), 4.21 (d,  $J = 10.3$  Hz, 1H), 3.96 - 3.92 (m, 2H), 3.42 (d,  $J = 9.8$  Hz, 1H), 3.26 (d,  $J = 16.8$  Hz, 1H), 2.73 (d,  $J = 16.7$  Hz, 1H), 2.46 (s, 3H), 2.34 - 2.21 (m, 5H), 1.13 (s, 9H), 0.96 (t,  $J = 7.6$  Hz, 3H).  $^{13}\text{C}$  NMR ( $\text{CDCl}_3$ , TMS, 150 MHz)  $\delta$  151.9, 149.2, 143.4, 142.6, 136.5, 135.1, 133.5, 132.5, 132.2, 129.7, 129.4, 128.0, 127.7, 126.9, 126.8, 125.9, 124.5, 70.8, 63.1, 58.9, 55.8, 44.9, 34.1, 31.1, 23.7, 21.6, 20.9, 11.5. IR (Acetone)  $\nu$  1033, 1100, 1145, 1231, 1301, 1555, 2994  $\text{cm}^{-1}$ . HRMS (ESI) calcd. for  $\text{C}_{39}\text{H}_{43}\text{O}_2\text{NS}_2\text{Na}$  ( $\text{M}+\text{Na}$ ): 644.2627, Found: 644.2627.

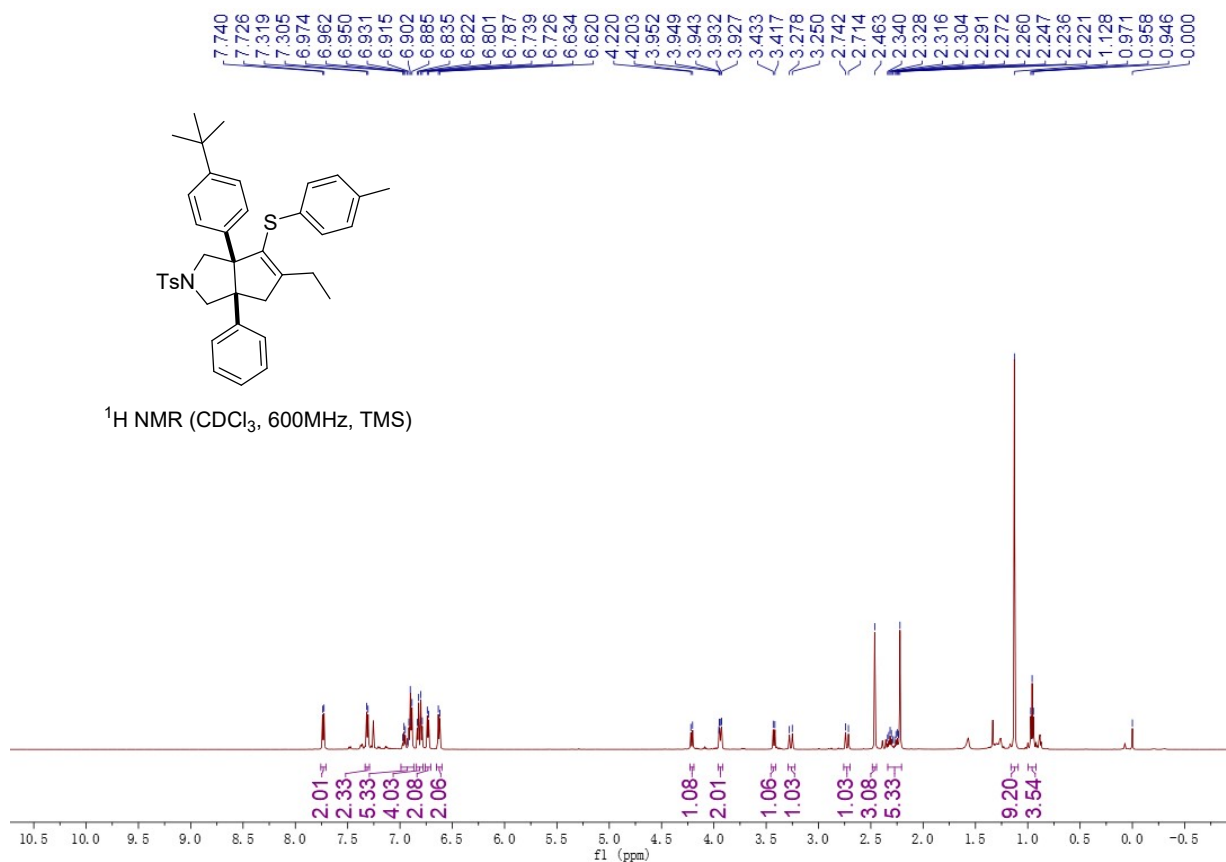

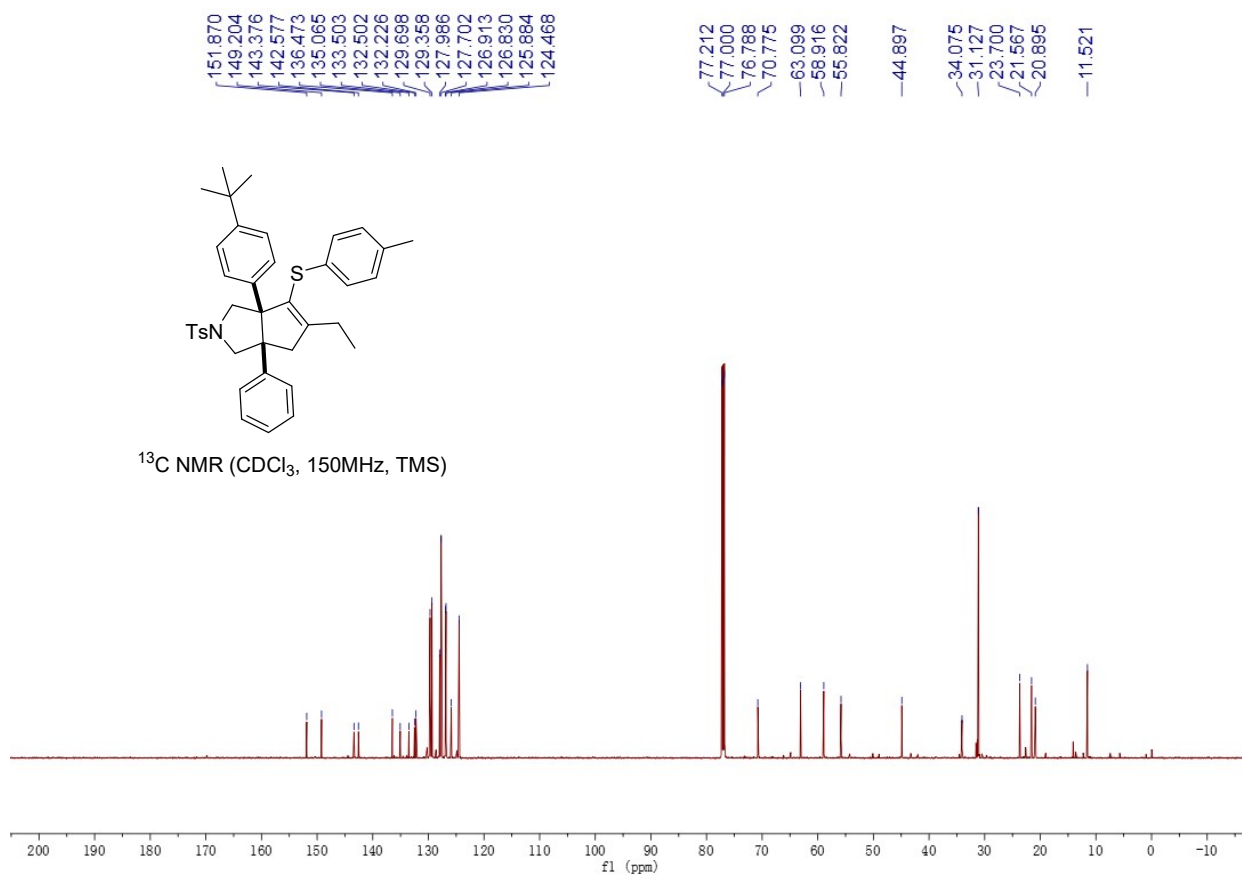

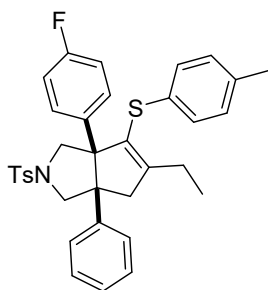

**5-ethyl-6a-(4-fluorophenyl)-3a-phenyl-6-(*p*-tolylthio)-2-tosyl-1,2,3,3a,4,6a-hexahydrocyclopenta[*c*]pyrrole (3da)**

A colorless oil, 41.4 mg, 71% yield.  $^1\text{H}$  NMR ( $\text{CDCl}_3$ , TMS, 600 MHz)  $\delta$  7.73 (d,  $J = 8.2$  Hz, 2H), 7.33 (d,  $J = 7.8$  Hz, 2H), 7.02 - 6.91 (m, 3H), 6.90 - 6.82 (m, 4H), 6.74 (d,  $J = 7.7$  Hz, 2H), 6.67 (d,  $J = 14.1$  Hz, 2H), 6.58 (t,  $J = 8.7$  Hz, 2H), 4.15 (d,  $J = 10.3$  Hz, 1H), 3.96 (d,  $J = 10.0$  Hz, 1H), 3.90 (d,  $J = 10.3$  Hz, 1H), 3.40 (d,  $J = 10.0$  Hz, 1H), 3.27 (d,  $J = 16.9$  Hz, 1H), 2.72 (d,  $J = 16.9$  Hz, 1H), 2.48 (s, 3H), 2.37 - 2.24 (m, 5H), 0.98 (t,  $J = 7.6$  Hz, 3H).  $^{13}\text{C}$  NMR ( $\text{CDCl}_3$ , TMS, 150 MHz)  $\delta$  161.3 (d,  $J = 245.8$  Hz), 152.0, 143.6, 142.3, 135.7, 135.6 (d,  $J = 3.3$  Hz), 133.3, 132.4, 131.6, 129.8, 129.5, 128.9 (d,  $J = 8.3$  Hz), 128.5, 127.9, 127.8, 126.9, 126.2, 114.4 (d,  $J = 20.8$  Hz), 70.8, 63.2, 59.1, 56.0, 44.8, 23.7, 21.6, 20.9, 11.6.  $^{19}\text{F}$  NMR ( $\text{CDCl}_3$ , TMS, 564 MHz)  $\delta$  -116.3 (s). IR (Acetone)  $\nu$  1093, 1220, 1359, 1420, 1711, 3006  $\text{cm}^{-1}$ . HRMS (ESI) calcd. for  $\text{C}_{35}\text{H}_{34}\text{O}_2\text{NFS}_2\text{Na}$  ( $\text{M}+\text{Na}$ ): 606.1907, Found: 606.1911.

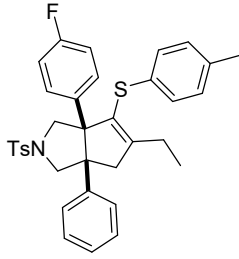

<sup>1</sup>H NMR (CDCl<sub>3</sub>, 600MHz, TMS)

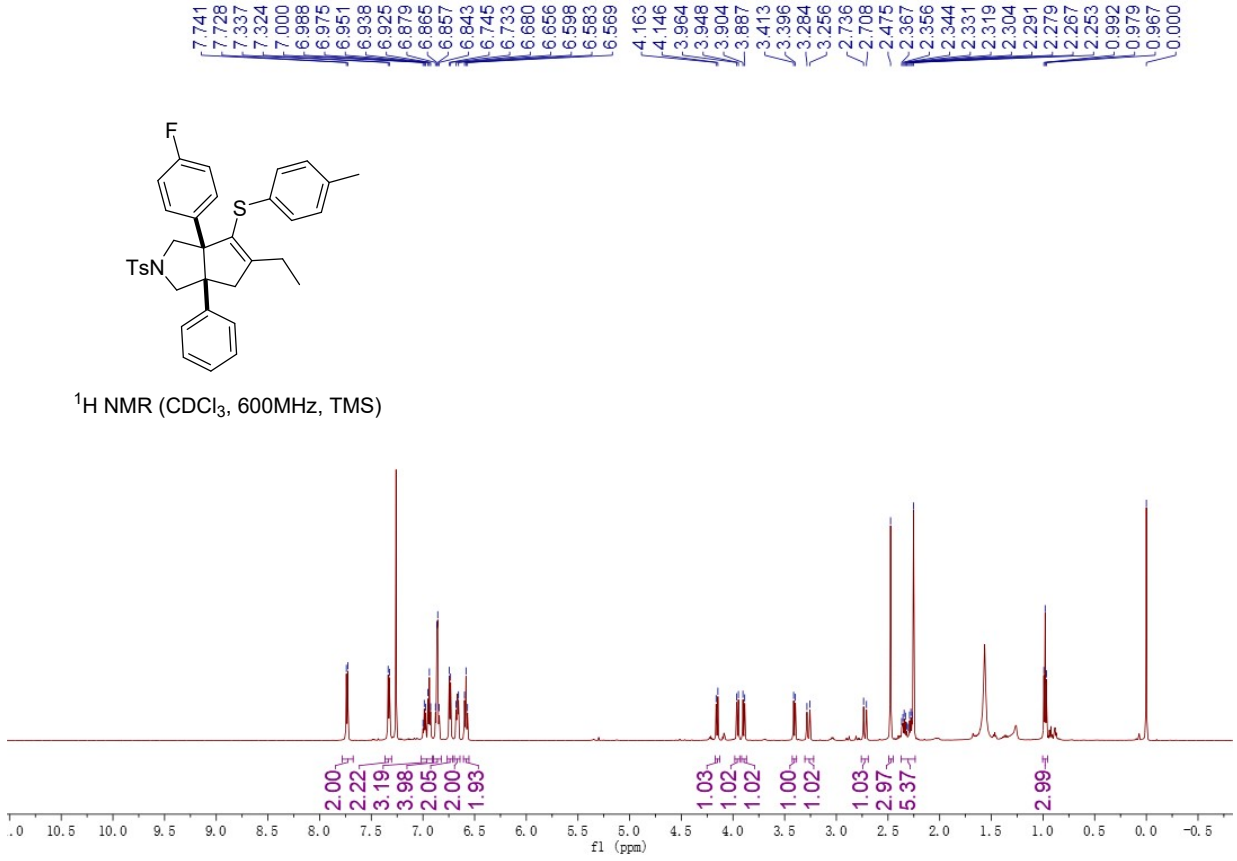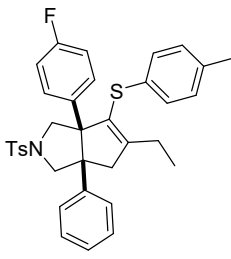

<sup>13</sup>C NMR (CDCl<sub>3</sub>, 150MHz, TMS)

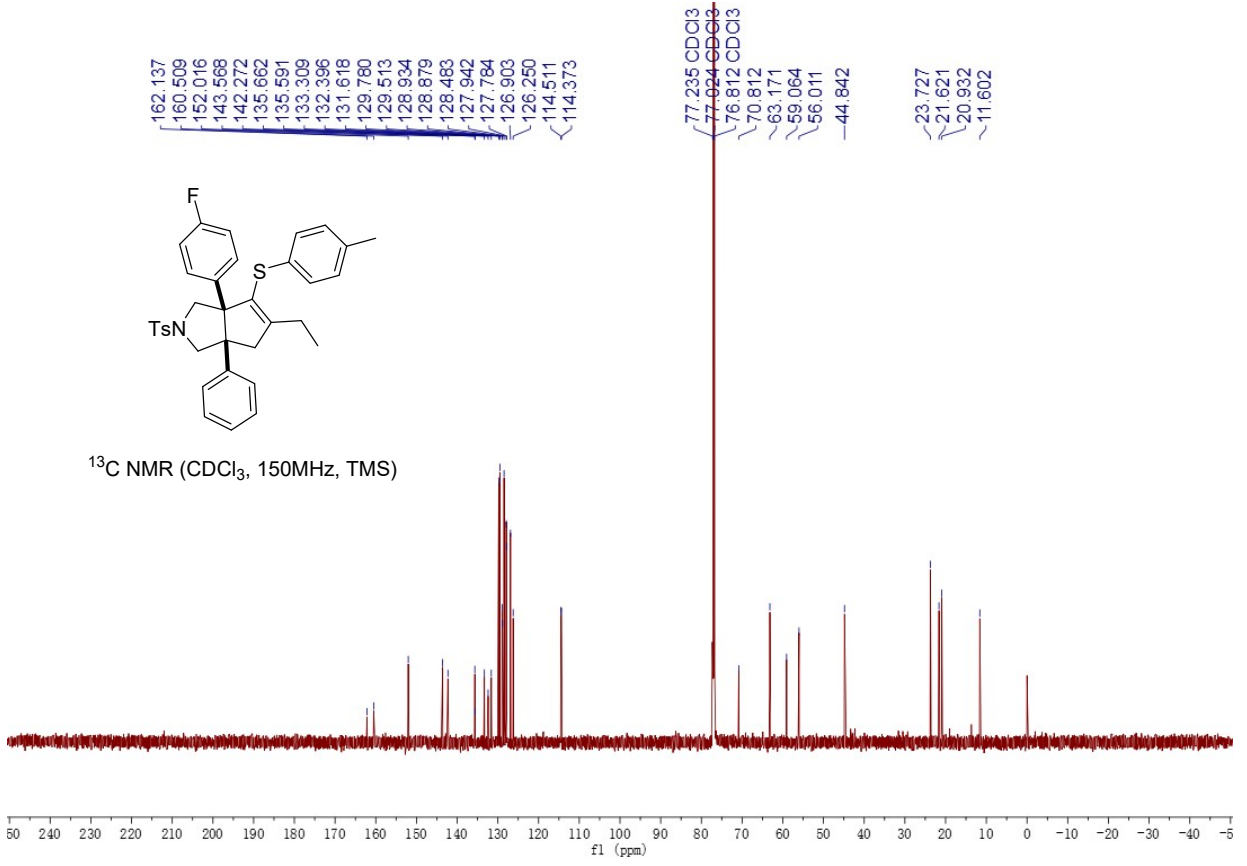

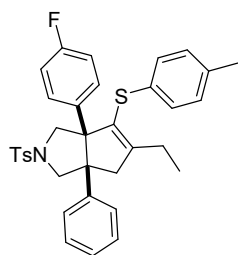

$^{19}\text{F}$  NMR ( $\text{CDCl}_3$ , 565MHz, TMS)

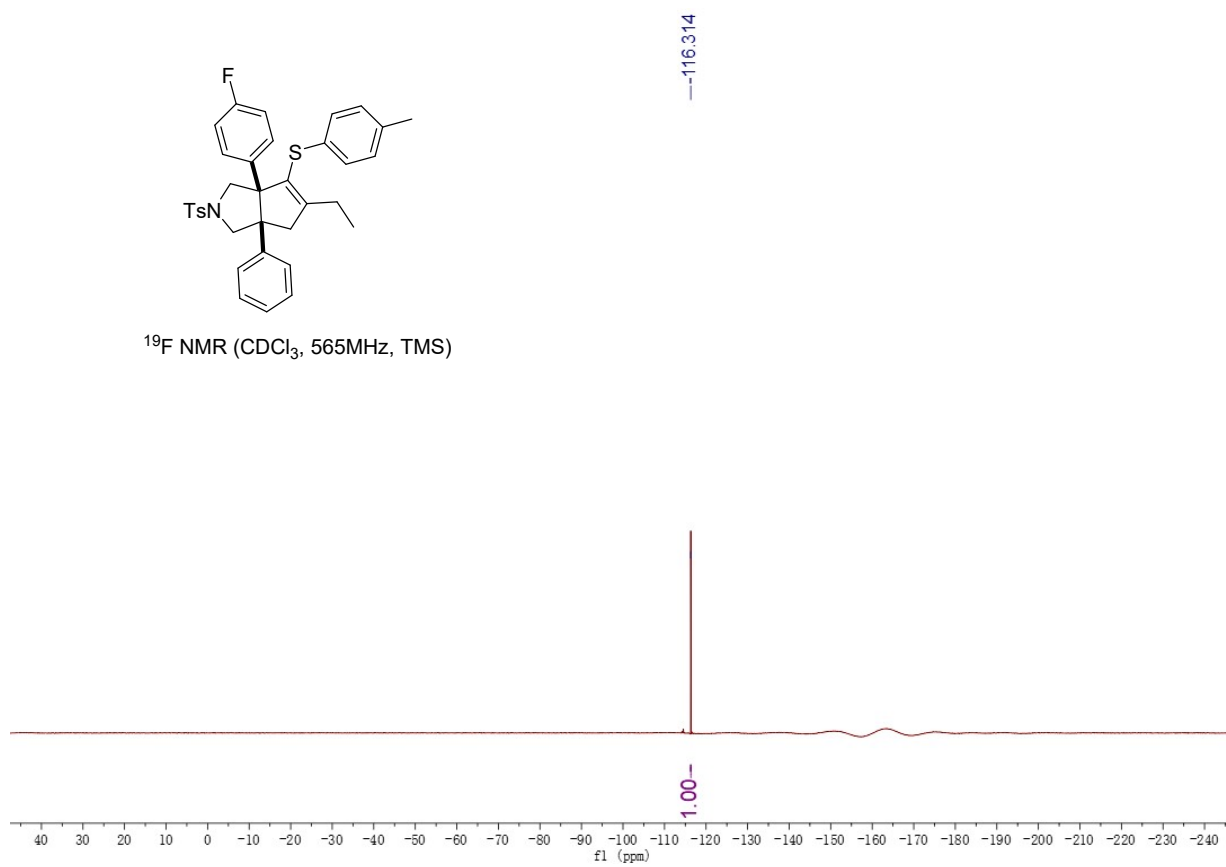

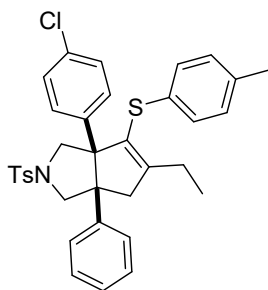

**6a-(4-chlorophenyl)-5-ethyl-3a-phenyl-6-(p-tolylthio)-2-tosyl-1,2,3,3a,4,6a-hexahydrocyclopenta[c]pyrrole (3ea)**

A colorless oil, 48.0 mg, 80% yield.  $^1\text{H}$  NMR ( $\text{CDCl}_3$ , TMS, 600 MHz)  $\delta$  7.73 (d,  $J = 8.0$  Hz, 2H), 7.32 (d,  $J = 7.8$  Hz, 2H), 7.03 - 6.93 (m, 3H), 6.88 - 6.80 (m, 6H), 6.75 (d,  $J = 7.7$  Hz, 2H), 6.62 (d,  $J = 8.6$  Hz, 2H), 4.19 (d,  $J = 10.3$  Hz, 1H), 3.91 (dd,  $J = 15.2, 10.1$  Hz, 2H), 3.40 (d,  $J = 10.0$  Hz, 1H), 3.28 (d,  $J = 16.9$  Hz, 1H), 2.74 (d,  $J = 16.9$  Hz, 1H), 2.47 (s, 3H), 2.39 - 2.24 (m, 5H), 0.98 (t,  $J = 7.6$  Hz, 3H).  $^{13}\text{C}$  NMR ( $\text{CDCl}_3$ , TMS, 150 MHz)  $\delta$  152.2, 143.6, 142.2, 138.5, 135.8, 133.3, 132.5, 132.3, 131.4, 129.8, 129.5, 128.7, 128.6, 128.0, 127.8, 127.7, 126.9, 126.3, 70.7, 63.3, 59.1, 55.9, 44.8, 23.7, 21.6, 20.9, 11.6. IR (Acetone)  $\nu$  1009, 1092, 1168, 1344, 1491, 2870  $\text{cm}^{-1}$ . HRMS (ESI) calcd. for  $\text{C}_{35}\text{H}_{34}\text{O}_2\text{NCIS}_2\text{Na}$  ( $\text{M}+\text{Na}$ ): 622.1612, Found: 622.1620.

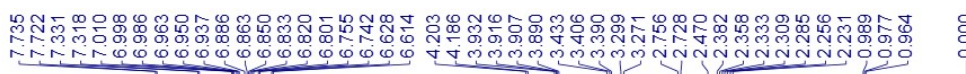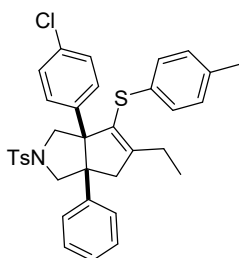

$^1\text{H}$  NMR ( $\text{CDCl}_3$ , 600MHz, TMS)

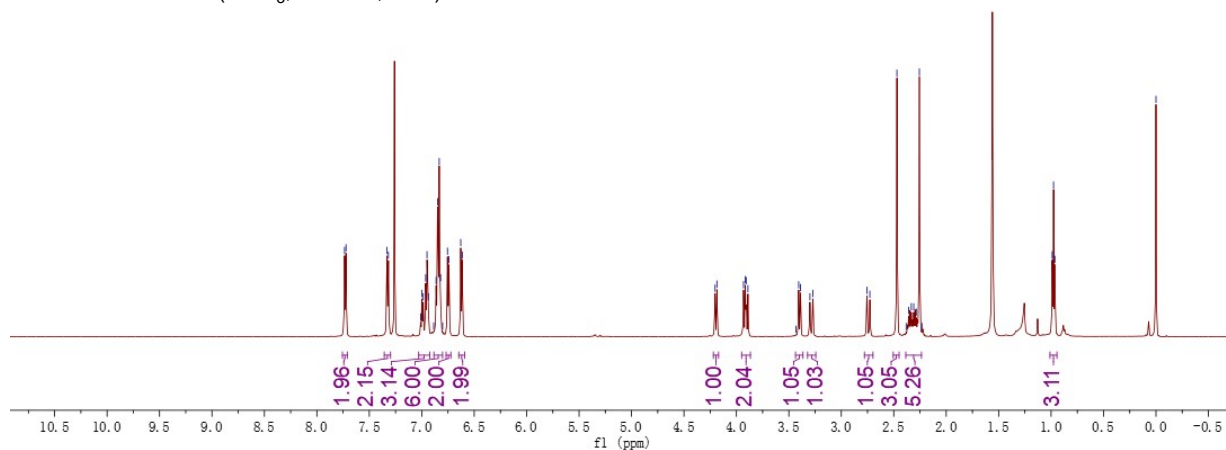



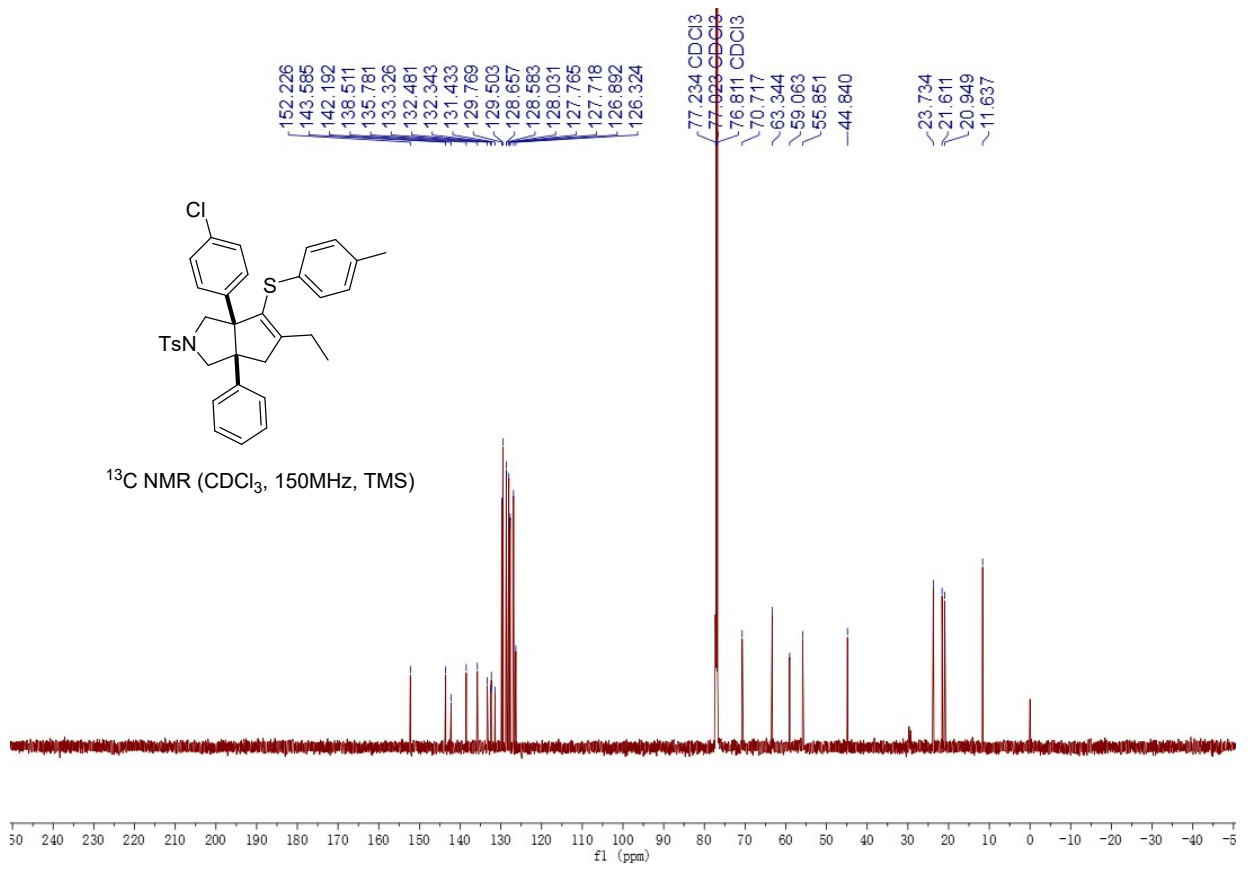

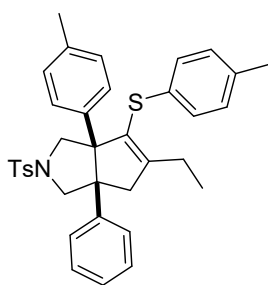

**5-ethyl-3a-phenyl-6a-(*p*-tolyl)-6-(*p*-tolylthio)-2-tosyl-1,2,3,3a,4,6a-hexahydrocyclopenta[*c*]pyrrole (3ga)**

A colorless oil, 36.5 mg, 63% yield.  $^1\text{H}$  NMR ( $\text{CDCl}_3$ , TMS, 600 MHz)  $\delta$  7.73 (d,  $J = 8.2$  Hz, 2H), 7.31 (d,  $J = 8.0$  Hz, 2H), 6.98 - 6.90 (m, 3H), 6.89 - 6.83 (m, 4H), 6.79 - 6.69 (m, 4H), 6.61 (d,  $J = 8.2$  Hz, 2H), 4.20 (d,  $J = 10.2$  Hz, 1H), 3.92 (dd,  $J = 15.3, 10.1$  Hz, 2H), 3.46 (d,  $J = 9.9$  Hz, 1H), 3.29 (d,  $J = 16.7$  Hz, 1H), 2.74 (d,  $J = 16.7$  Hz, 1H), 2.46 (s, 3H), 2.35 - 2.22 (m, 5H), 2.11 (s, 3H), 0.96 (t,  $J = 7.6$  Hz, 3H).  $^{13}\text{C}$  NMR ( $\text{CDCl}_3$ , TMS, 150 MHz)  $\delta$  151.6, 143.4, 142.7, 136.6, 136.0, 135.2, 133.5, 132.9, 132.2, 129.7, 129.4, 128.4, 128.1, 127.8, 127.7, 127.1, 126.9, 126.0, 70.9, 63.5, 58.8, 55.8, 45.0, 23.7, 21.6, 20.9, 20.8, 11.5. IR (Acetone)  $\nu$  1116, 1158, 1165, 1346, 1487, 2923  $\text{cm}^{-1}$ . HRMS (ESI) calcd. for  $\text{C}_{36}\text{H}_{37}\text{O}_2\text{NS}_2\text{Na}$  ( $\text{M}+\text{Na}$ ): 602.2158, Found: 602.2148.

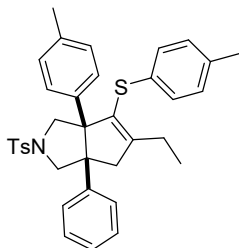

$^1\text{H NMR}$  ( $\text{CDCl}_3$ , 600MHz, TMS)

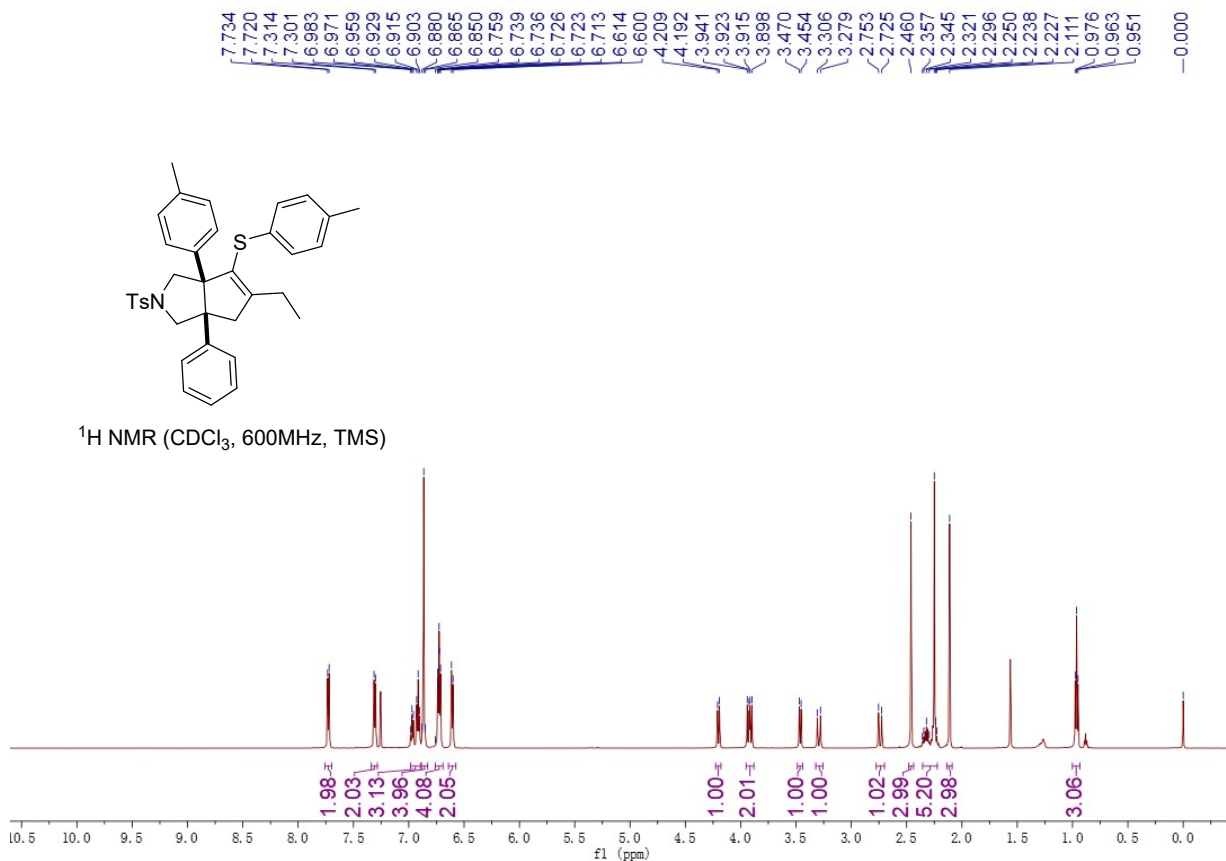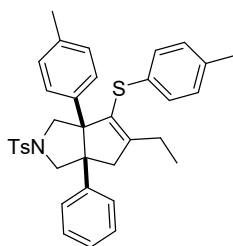

$^{13}\text{C NMR}$  ( $\text{CDCl}_3$ , 150MHz, TMS)

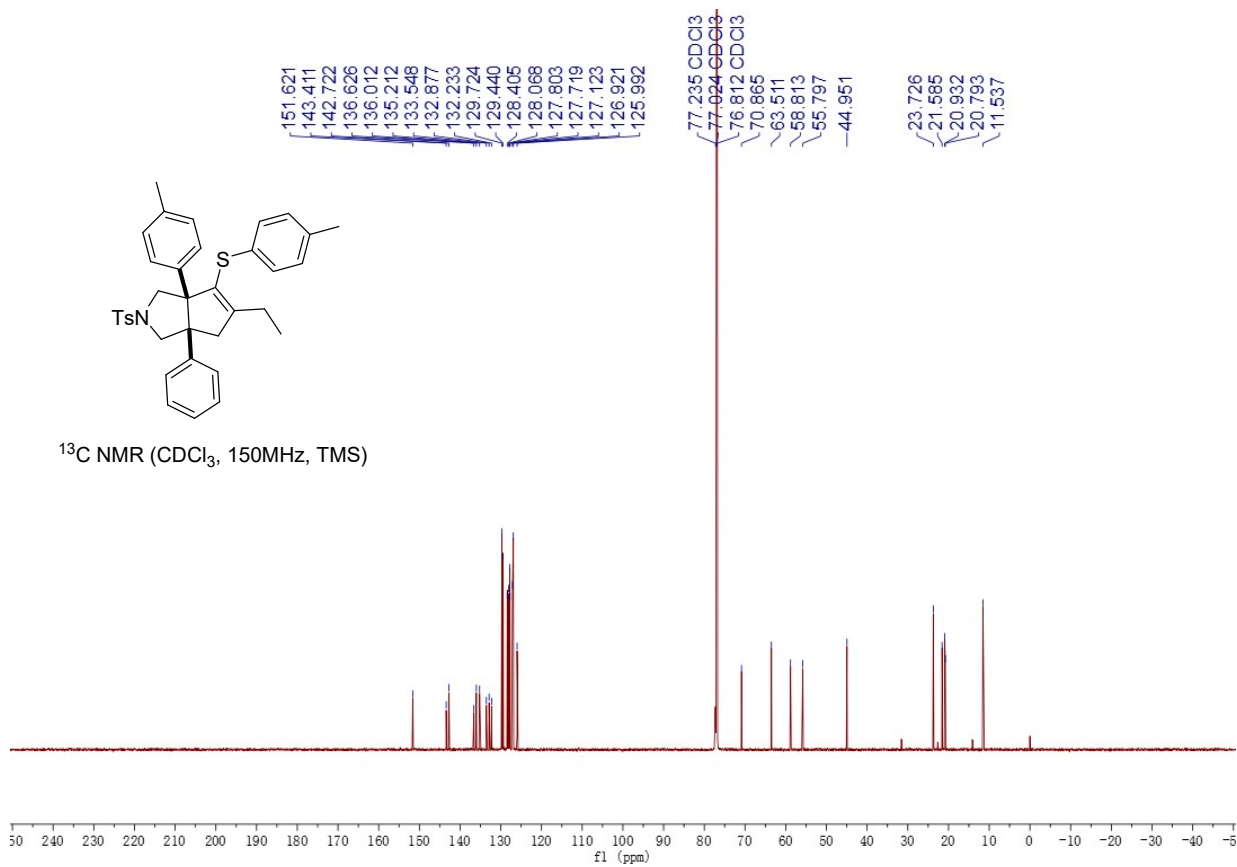

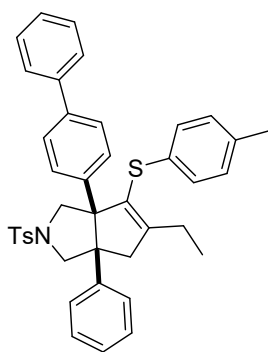

**6a-([1,1'-biphenyl]-4-yl)-5-ethyl-3a-phenyl-6-(*p*-tolylthio)-2-tosyl-1,2,3,3a,4,6a-hexahydrocyclopenta[*c*]pyrrole (3ha)**

A colorless oil, 36.6 mg, 57% yield.  $^1\text{H}$  NMR ( $\text{CDCl}_3$ , TMS, 600 MHz)  $\delta$  7.75 (d,  $J = 7.7$  Hz, 2H), 7.40 - 7.27 (m, 7H), 7.12 (d,  $J = 8.5$  Hz, 2H), 7.00 - 6.91 (m, 3H), 6.87 - 6.75 (m, 8H), 4.27 (d,  $J = 10.3$  Hz, 1H), 4.00 (d,  $J = 10.3$  Hz, 1H), 3.95 (d,  $J = 9.9$  Hz, 1H), 3.45 (d,  $J = 9.9$  Hz, 1H), 3.34 (d,  $J = 16.9$  Hz, 1H), 2.78 (d,  $J = 16.8$  Hz, 1H), 2.47 (s, 3H), 2.39 - 2.34 (m, 1H), 2.32 - 2.26 (m, 1H), 2.18 (s, 3H), 0.99 (t,  $J = 7.6$  Hz, 3H).  $^{13}\text{C}$  NMR ( $\text{CDCl}_3$ , TMS, 150 MHz)  $\delta$  152.1, 143.5, 142.5, 140.5, 139.0, 138.9, 135.3, 133.5, 132.6, 131.9, 129.7, 129.4, 128.6, 128.2, 127.9, 127.73, 127.67, 127.1, 126.9, 126.8, 126.2, 126.1, 70.9, 63.4, 59.0, 55.9, 44.9, 31.6, 23.7, 21.6, 20.9, 11.6. IR (Acetone)  $\nu$  1126, 1148 1175, 1326, 1483, 2921  $\text{cm}^{-1}$ . HRMS (ESI) calcd. for  $\text{C}_{41}\text{H}_{39}\text{O}_2\text{NS}_2\text{Na}$  ( $\text{M}+\text{Na}$ ): 664.2314, Found: 664.2316.

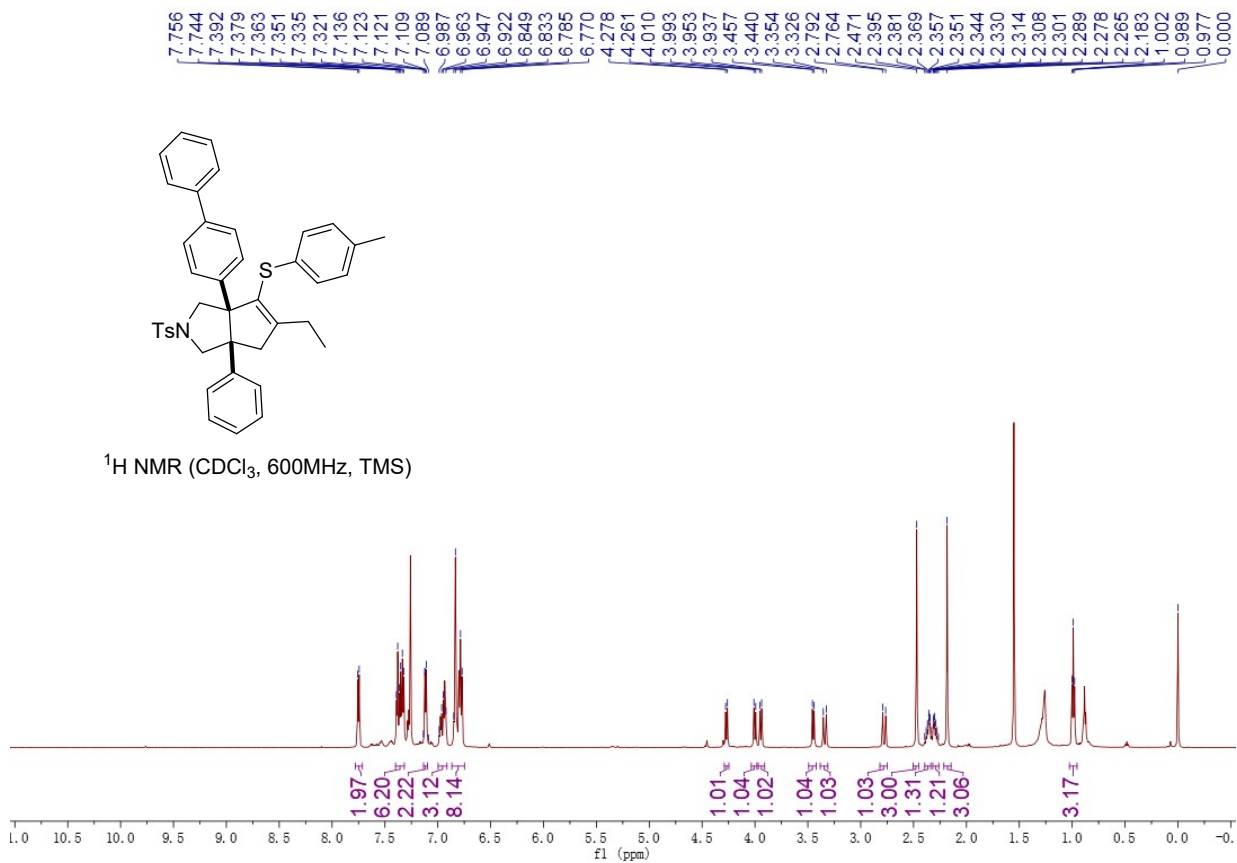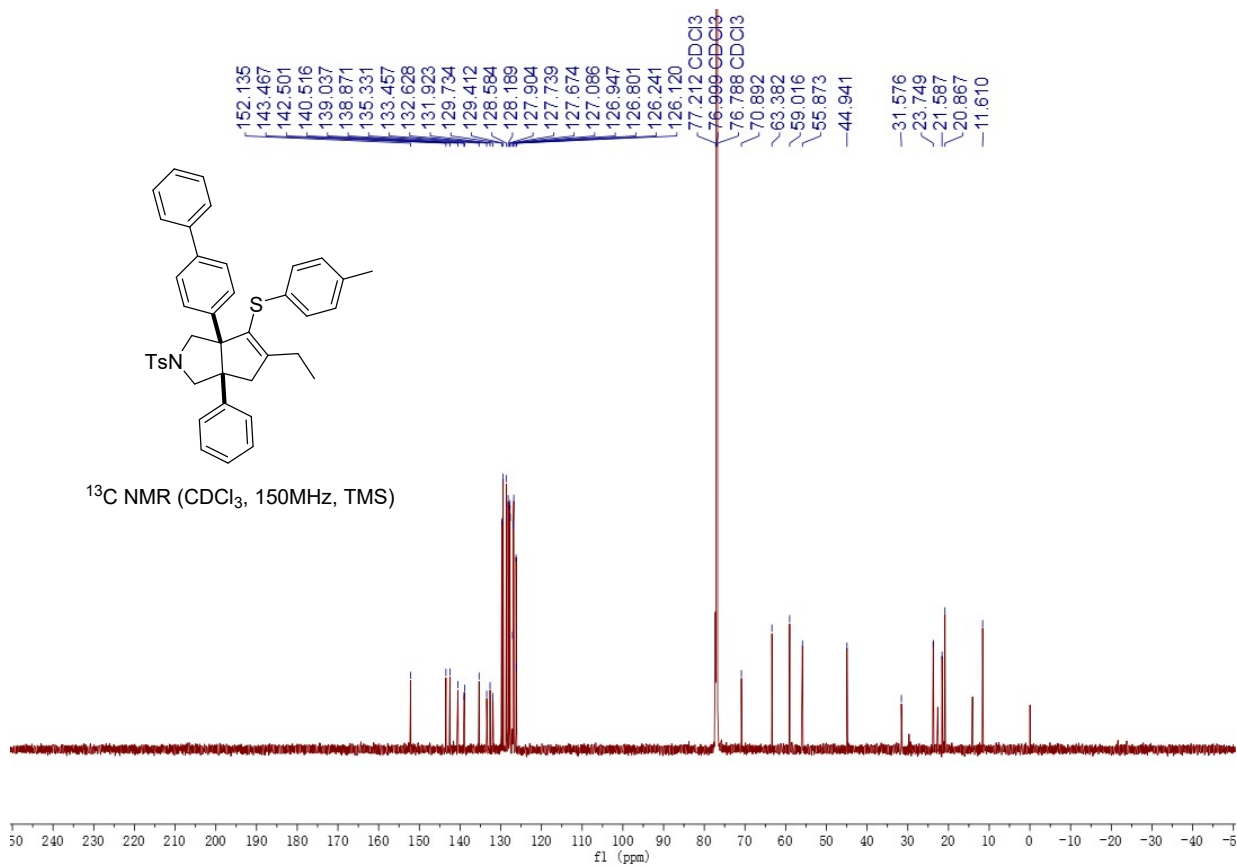

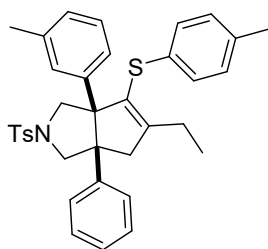

**5-ethyl-3a-phenyl-6a-(*m*-tolyl)-6-(*p*-tolylthio)-2-tosyl-1,2,3,3a,4,6a-hexahydrocyclopenta[*c*]pyrrole (3ia)**

A colorless oil, 35.3 mg, 61% yield.  $^1\text{H}$  NMR ( $\text{CDCl}_3$ , TMS, 600 MHz)  $\delta$  7.74 (d,  $J = 8.0$  Hz, 2H), 7.32 (d,  $J = 8.0$  Hz, 2H), 6.99 - 6.90 (m, 3H), 6.85 (s, 4H), 6.81 - 6.71 (m, 4H), 6.54 - 6.46 (m, 2H), 4.18 (d,  $J = 10.3$  Hz, 1H), 3.95 (dd,  $J = 10.1, 5.4$  Hz, 2H), 3.42 (d,  $J = 9.9$  Hz, 1H), 3.29 (d,  $J = 16.8$  Hz, 1H), 2.72 (d,  $J = 16.8$  Hz, 1H), 2.47 (s, 3H), 2.37 - 2.21 (m, 5H), 2.02 (s, 3H), 0.97 (t,  $J = 7.6$  Hz, 3H).  $^{13}\text{C}$  NMR ( $\text{CDCl}_3$ , TMS, 150 MHz)  $\delta$  151.7, 143.4, 142.5, 139.6, 137.1, 135.2, 133.5, 132.6, 132.1, 129.7, 129.4, 128.23, 128.18, 127.8, 127.7, 127.5, 127.1, 126.9, 126.0, 124.3, 71.1, 63.2, 59.1, 55.9, 44.9, 23.7, 21.6, 21.3, 20.9, 11.6. IR (Acetone)  $\nu$  1116, 1158, 1165, 1346, 1487, 2922  $\text{cm}^{-1}$ . HRMS (ESI) calcd. for  $\text{C}_{36}\text{H}_{37}\text{O}_2\text{NNaS}_2$  ( $\text{M}+\text{Na}$ ): 602.2158, Found: 602.2159.

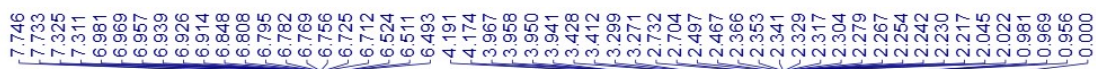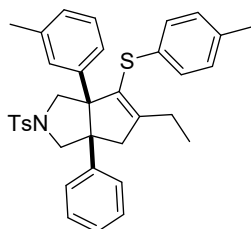

$^1\text{H}$  NMR ( $\text{CDCl}_3$ , 600MHz, TMS)

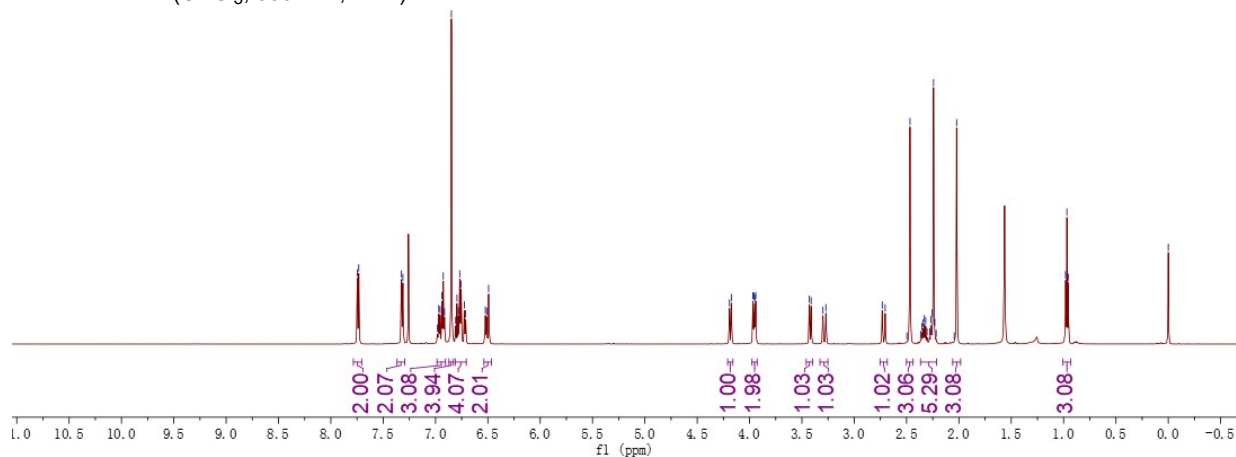

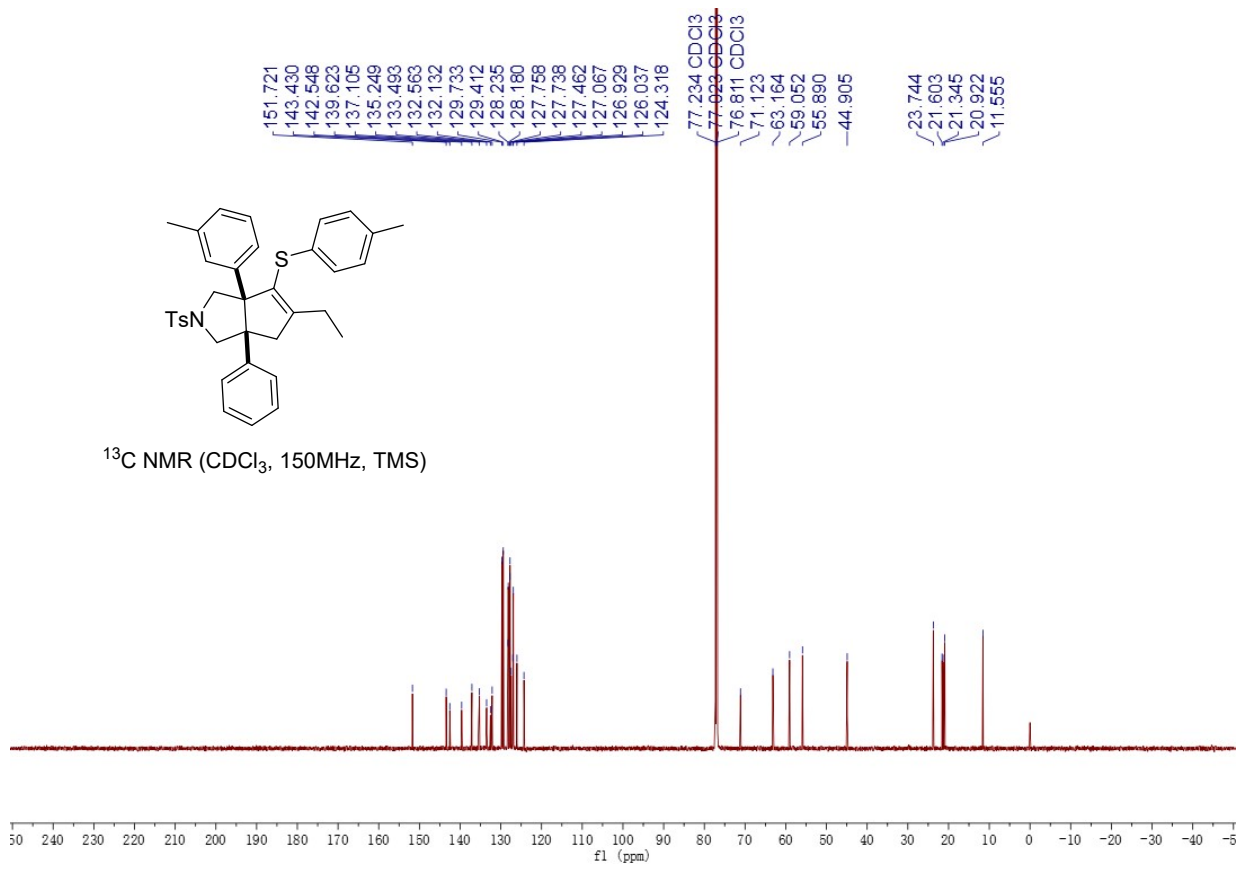

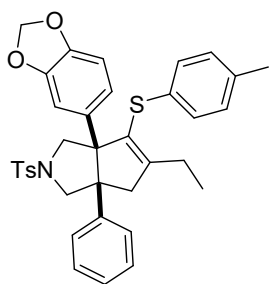

**6a-(benzo[d][1,3]dioxol-5-yl)-5-ethyl-3a-phenyl-6-(p-tolylthio)-2-tosyl-1,2,3,3a,4,6a-hexahydrocyclopenta[c]pyrrole (3ja)**

A colorless oil, 36.6 mg, 60% yield.  $^1\text{H}$  NMR ( $\text{CDCl}_3$ , TMS, 600 MHz)  $\delta$  7.73 (d,  $J = 8.1$  Hz, 2H), 7.32 (d,  $J = 7.9$  Hz, 2H), 7.02 - 6.86 (m, 7H), 6.75 (d,  $J = 7.5$  Hz, 2H), 6.36 (d,  $J = 8.2$  Hz, 1H), 6.22 (d,  $J = 8.2$  Hz, 1H), 6.18 (s, 1H), 5.74 (s, 2H), 4.16 (d,  $J = 10.2$  Hz, 1H), 3.91 (d,  $J = 10.0$  Hz, 1H), 3.86 (d,  $J = 10.3$  Hz, 1H), 3.42 (d,  $J = 10.0$  Hz, 1H), 3.27 (d,  $J = 16.9$  Hz, 1H), 2.72 (d,  $J = 16.9$  Hz, 1H), 2.47 (s, 3H), 2.37 - 2.25 (m, 5H), 0.98 (t,  $J = 7.6$  Hz, 3H).  $^{13}\text{C}$  NMR ( $\text{CDCl}_3$ , TMS, 150 MHz)  $\delta$  151.9, 147.1, 145.9, 143.5, 142.5, 135.4, 133.6, 133.4, 132.7, 132.0, 129.8, 129.4, 128.4, 127.9, 127.8, 126.9, 126.2, 120.7, 108.0, 107.4, 100.7, 71.0, 63.5, 58.9, 55.9, 44.9, 23.7, 21.6, 20.9, 11.6. IR (Acetone)  $\nu$  1170, 1246, 1346, 1485, 1594, 2878  $\text{cm}^{-1}$ . HRMS (ESI) calcd. for  $\text{C}_{36}\text{H}_{35}\text{O}_4\text{NS}_2\text{Na}$  ( $\text{M}+\text{Na}$ ): 632.1900, Found: 632.1900.

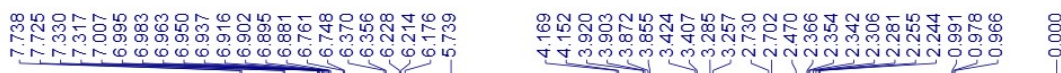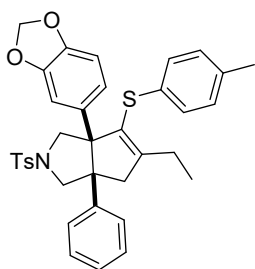

$^1\text{H}$  NMR ( $\text{CDCl}_3$ , 600MHz, TMS)

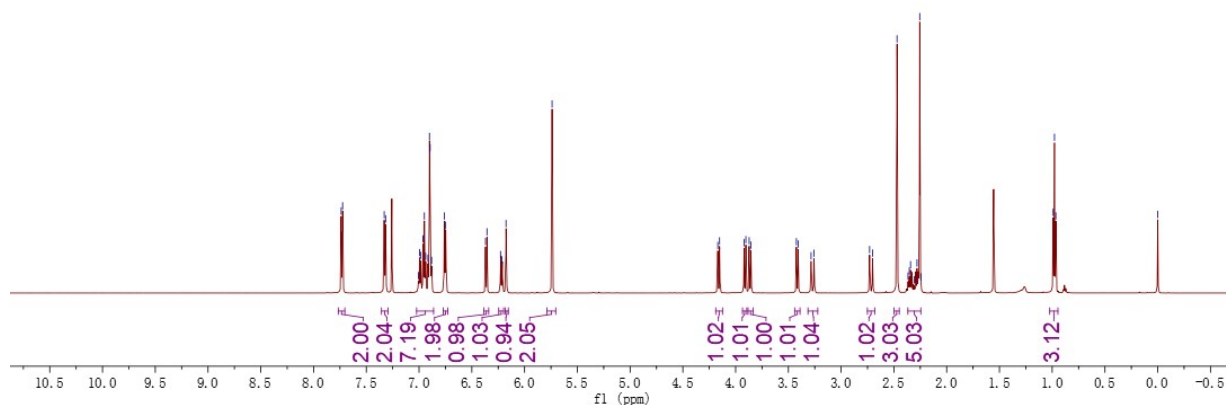



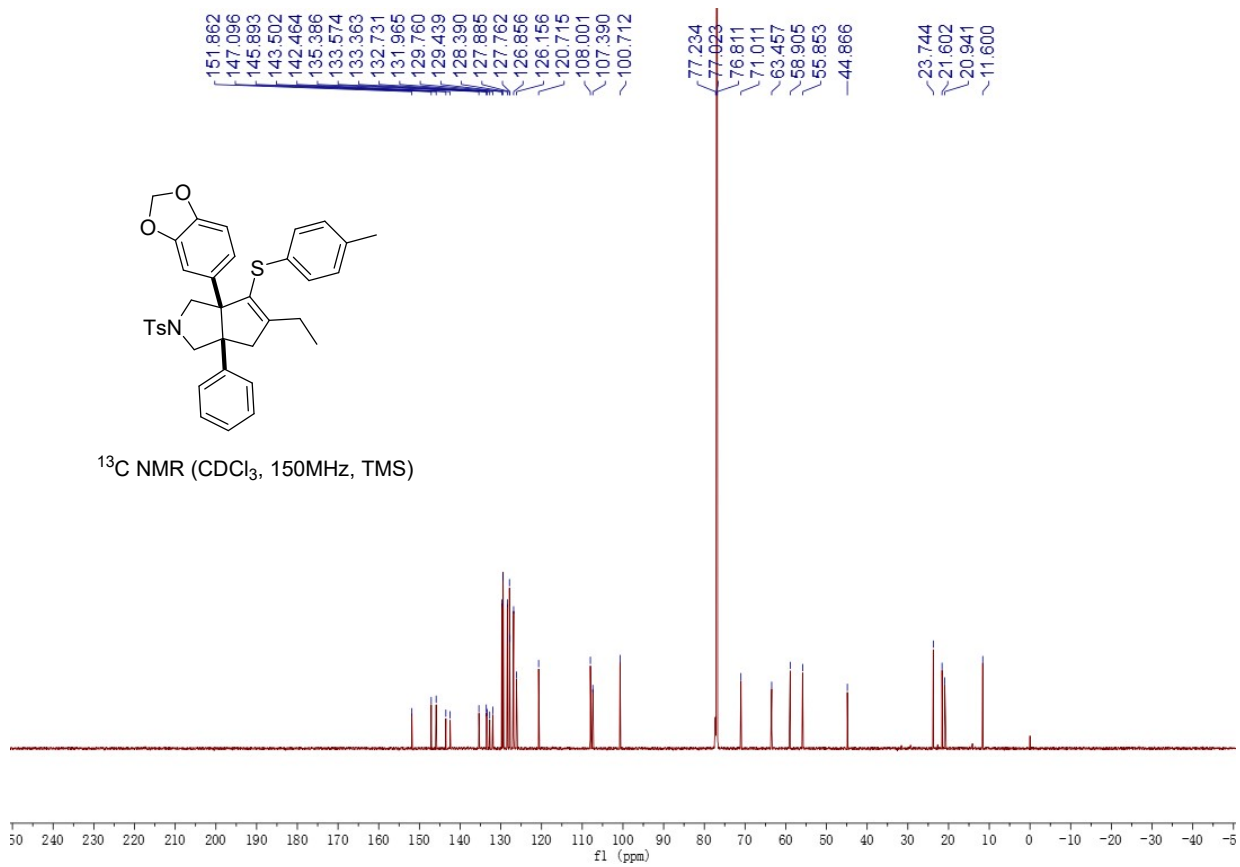

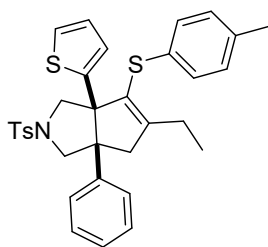

**5-ethyl-3a-phenyl-6a-(thiophen-2-yl)-6-(*p*-tolylthio)-2-tosyl-1,2,3,3a,4,6a-hexahydrocyclopenta[*c*]pyrrole (3ka)**

A colorless oil, 26.3 mg, 46% yield. <sup>1</sup>H NMR (CDCl<sub>3</sub>, TMS, 600 MHz) δ 7.81 - 7.76 (m, 2H), 7.36 (d, *J* = 8.0 Hz, 2H), 7.07 - 7.04 (m, 2H), 7.03 - 6.99 (m, 1H), 6.97 (d, *J* = 8.0 Hz, 2H), 6.92 - 6.88 (m, 3H), 6.71 - 6.66 (m, 2H), 6.59 (dd, *J* = 5.1, 3.6 Hz, 1H), 6.29 (d, *J* = 3.6 Hz, 1H), 4.28 (d, *J* = 10.2 Hz, 1H), 4.01 (d, *J* = 10.2 Hz, 1H), 3.80 (d, *J* = 10.2 Hz, 1H), 3.56 (d, *J* = 10.2 Hz, 1H), 3.35 (d, *J* = 16.8 Hz, 1H), 2.59 (d, *J* = 16.8 Hz, 1H), 2.51 - 2.41 (m, 4H), 2.34 - 2.27 (m, 4H), 1.03 (t, *J* = 7.6 Hz, 3H). <sup>13</sup>C NMR (CDCl<sub>3</sub>, TMS, 150 MHz) δ 153.4, 143.5, 142.8, 135.7, 134.4, 132.3, 131.9, 129.8, 129.6, 128.6, 127.8, 127.6, 126.6, 126.3, 125.1, 124.8, 69.6, 61.9, 59.2, 54.9, 42.8, 23.9, 21.6, 21.0, 11.5. IR (Acetone) ν 1089, 1163, 1346, 1493, 1594, 2915 cm<sup>-1</sup>. HRMS (ESI) calcd. for C<sub>33</sub>H<sub>33</sub>S<sub>3</sub>NO<sub>2</sub>Na (M+Na): 594.1566, Found: 594.1568.

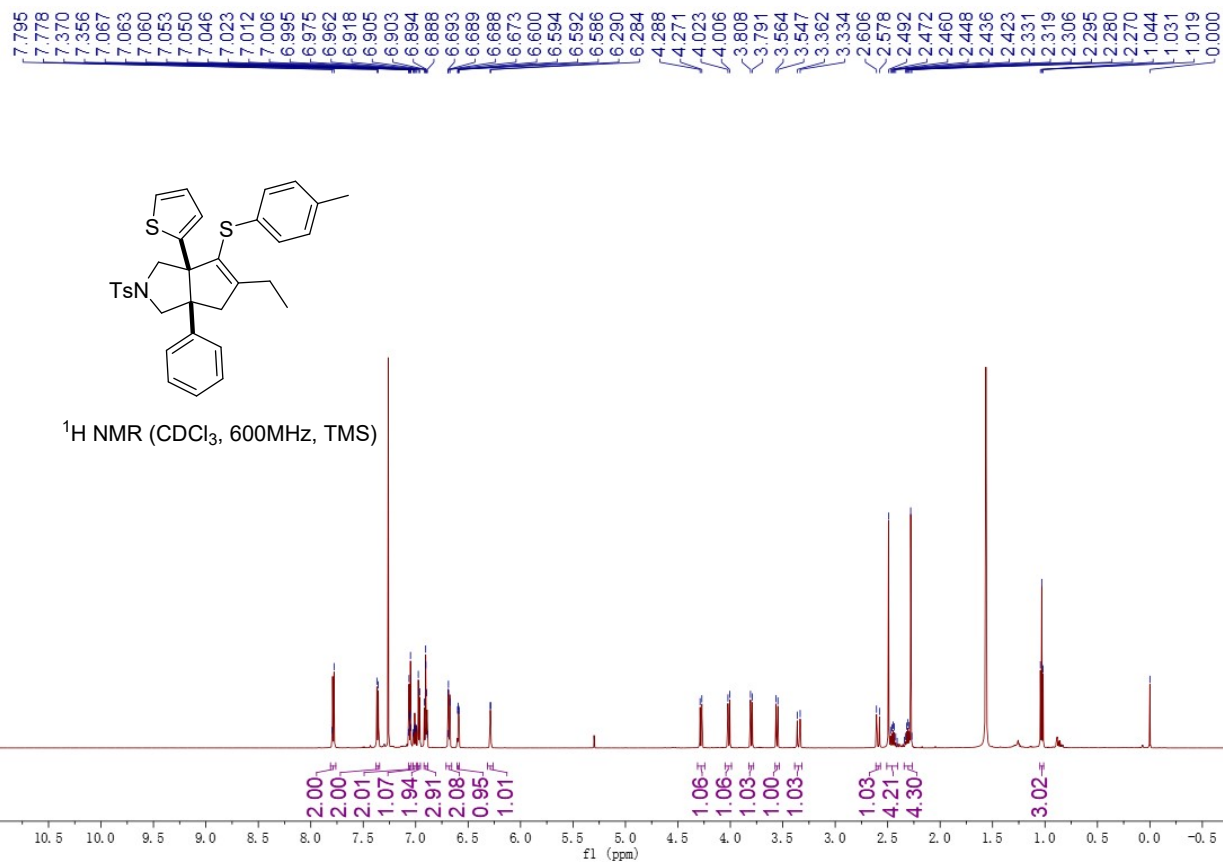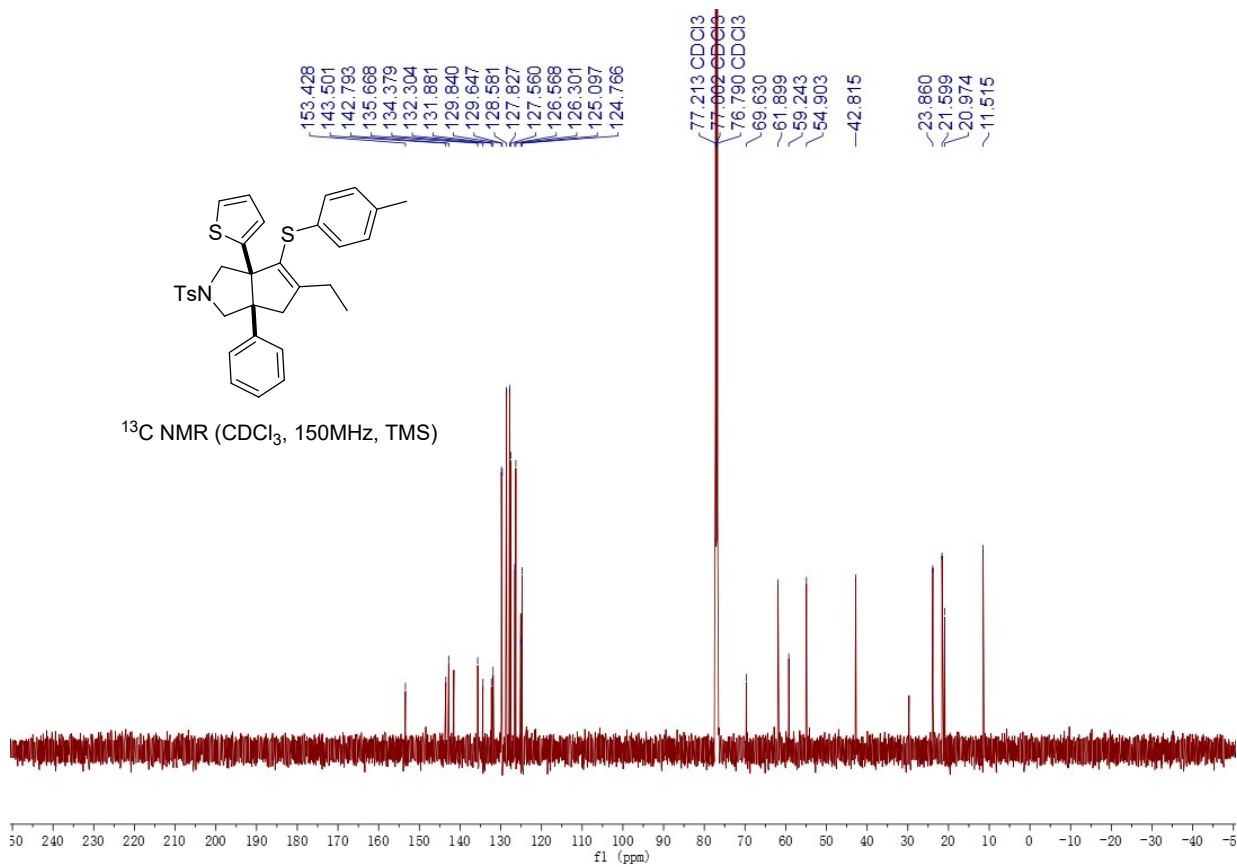

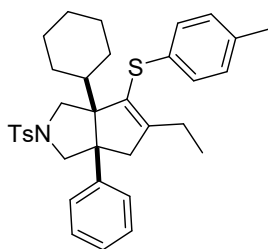

**6a-cyclohexyl-5-ethyl-3a-phenyl-6-(*p*-tolylthio)-2-tosyl-1,2,3,3a,4,6a-hexahydrocyclopenta[*c*]pyrrole (3ma)**

A colorless oil, 30.3 mg, 53% yield. <sup>1</sup>H NMR (CDCl<sub>3</sub>, TMS, 600 MHz) δ 7.75 (d, *J* = 8.0 Hz, 2H), 7.33 (d, *J* = 7.9 Hz, 2H), 7.17 - 7.02 (m, 7H), 6.85 (d, *J* = 7.7 Hz, 2H), 4.24 (d, *J* = 10.0 Hz, 1H), 3.67 (d, *J* = 10.1 Hz, 1H), 3.47 (d, *J* = 10.1 Hz, 1H), 3.36 (d, *J* = 10.1 Hz, 1H), 3.26 (d, *J* = 16.2 Hz, 1H), 2.47 (s, 3H), 2.40 (d, *J* = 16.3 Hz, 1H), 2.34 - 2.27 (m, 4H), 2.15 - 2.08 (m, 1H), 1.41 - 1.29 (m, 5H), 0.93 - 0.72 (m, 8H), 0.56 - 0.47 (m, 1H). <sup>13</sup>C NMR (CDCl<sub>3</sub>, TMS, 150 MHz) δ 152.0, 143.2, 142.9, 135.3, 134.9, 133.3, 130.4, 129.8, 128.19, 128.17, 127.4, 126.59, 126.55, 69.3, 64.7, 58.3, 55.7, 44.0, 43.0, 29.7, 27.5, 27.2, 25.91, 25.87, 24.2, 21.6, 21.0, 11.4. IR (Acetone) ν 1015, 1105, 1166, 1342, 1490, 2920 cm<sup>-1</sup>. HRMS (ESI) calcd. for C<sub>35</sub>H<sub>41</sub>NNaO<sub>2</sub>S<sub>2</sub> (M+Na): 594.2471, Found: 594.2467.

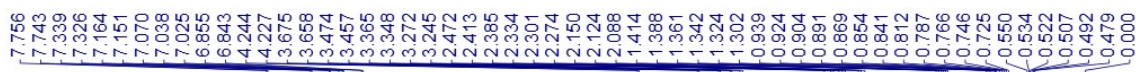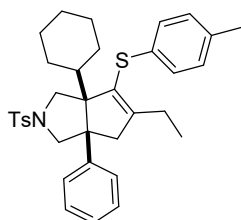

<sup>1</sup>H NMR (CDCl<sub>3</sub>, 600MHz, TMS)

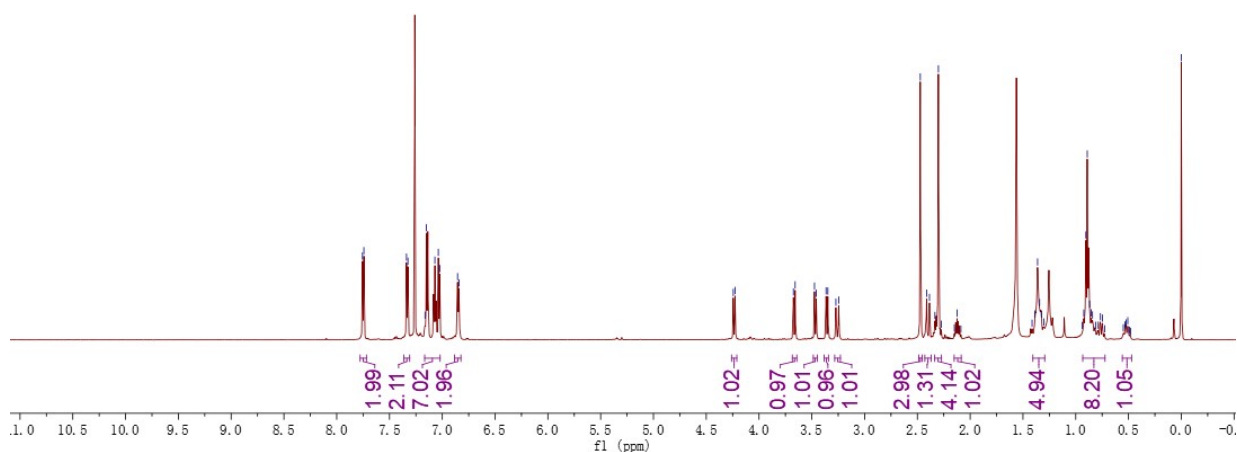

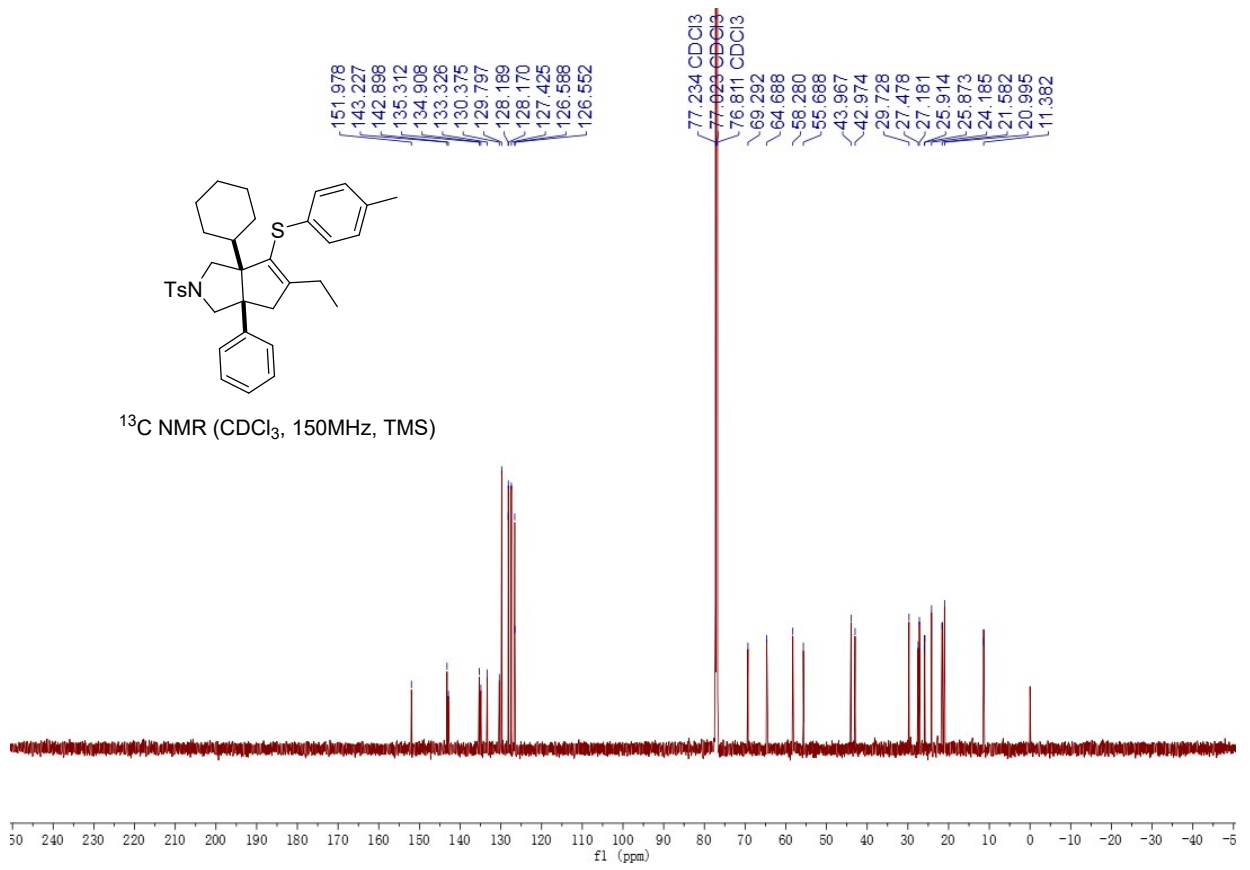

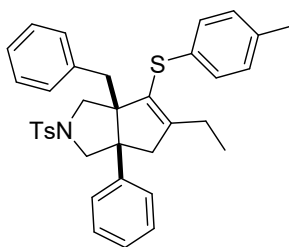

**6a-benzyl-5-ethyl-3a-phenyl-6-(*p*-tolylthio)-2-tosyl-1,2,3,3a,4,6a-hexahydrocyclopenta[*c*]pyrrole (3na)**

A colorless oil, 24.9 mg, 43% yield.  $^1\text{H}$  NMR ( $\text{CDCl}_3$ , TMS, 400 MHz)  $\delta$  7.68 (d,  $J = 8.2$  Hz, 2H), 7.29 (d,  $J = 8.0$  Hz, 2H), 7.24 - 7.19 (m, 1H), 7.15 - 7.09 (m, 4H), 7.06 - 6.94 (m, 5H), 6.79 (d,  $J = 7.4$  Hz, 2H), 6.36 (d,  $J = 7.4$  Hz, 2H), 4.15 (d,  $J = 10.0$  Hz, 1H), 3.58 (d,  $J = 10.0$  Hz, 1H), 3.52 (d,  $J = 10.0$  Hz, 1H), 3.45 (d,  $J = 10.0$  Hz, 1H), 2.61 (d,  $J = 13.9$  Hz, 1H), 2.53 (d,  $J = 13.9$  Hz, 1H), 2.47 (s, 3H), 2.34 - 2.23 (m, 6H), 2.10 - 2.03 (m, 1H), 0.73 (t,  $J = 7.6$  Hz, 3H).  $^{13}\text{C}$  NMR ( $\text{CDCl}_3$ , TMS, 100 MHz)  $\delta$  153.7, 143.2, 143.1, 136.2, 135.3, 135.0, 133.0, 130.4, 129.8, 129.7, 128.3, 127.5, 127.4, 127.2, 127.0, 126.7, 126.3, 67.4, 63.9, 56.8, 56.6, 42.0, 38.5, 23.8, 21.6, 21.0, 11.0. IR (Acetone)  $\nu$  1039, 1161, 1343, 1490, 2972  $\text{cm}^{-1}$ . HRMS (ESI) calcd. for  $\text{C}_{36}\text{H}_{38}\text{O}_2\text{NS}_2$  (M+H): 580.2338, Found: 580.2303.

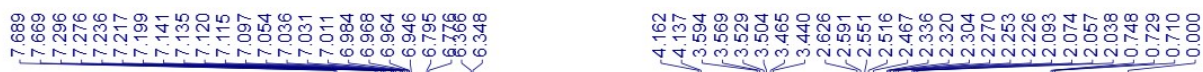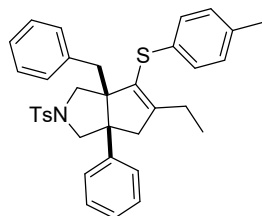

$^1\text{H}$  NMR ( $\text{CDCl}_3$ , 400MHz, TMS)

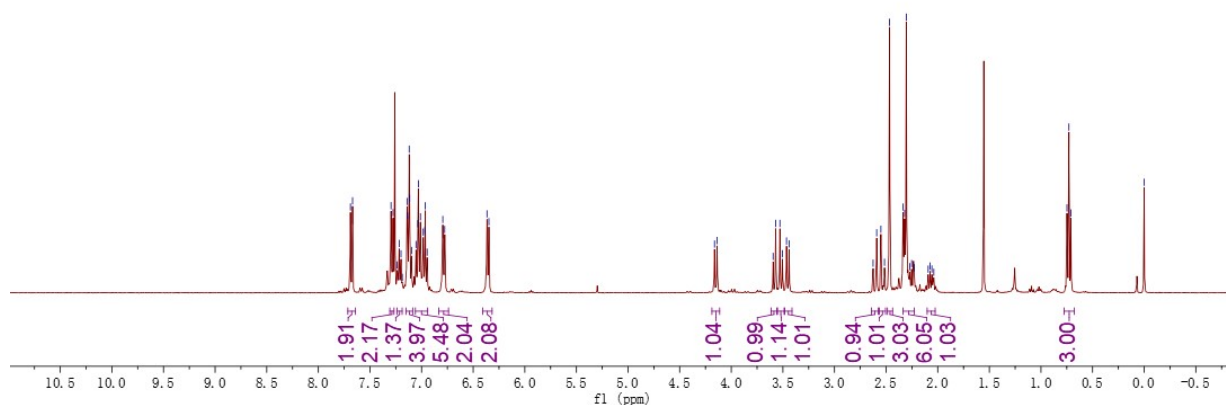

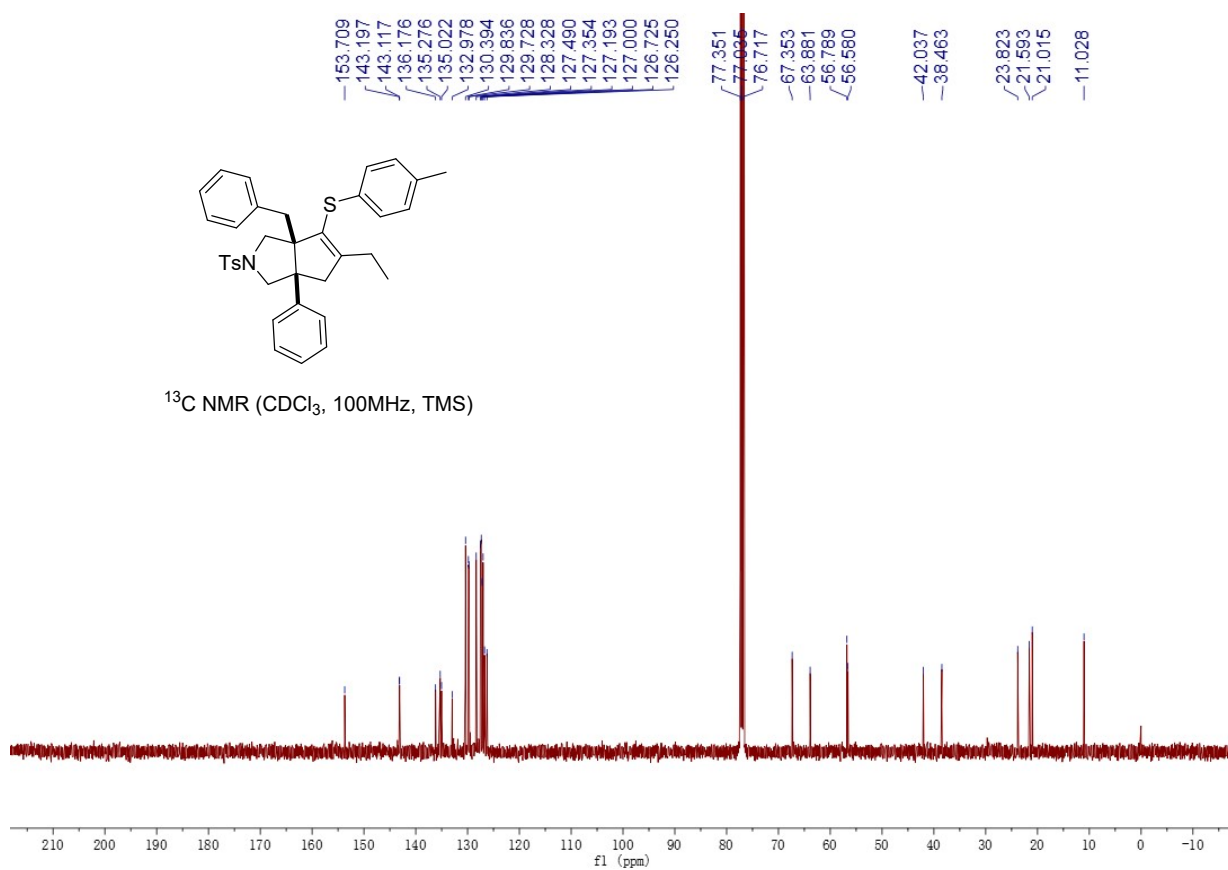

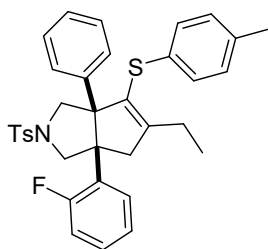

**5-ethyl-3a-(2-fluorophenyl)-6a-phenyl-6-(*p*-tolylthio)-2-tosyl-1,2,3,3a,4,6a-hexahydrocyclopenta[*c*]pyrrole (30a)**

A colorless oil, 35.6 mg, 61% yield.  $^1\text{H}$  NMR ( $\text{CDCl}_3$ , TMS, 600 MHz)  $\delta$  7.66 (d,  $J = 8.2$  Hz, 2H), 7.25 (d,  $J = 7.1$  Hz, 2H), 7.01 - 6.94 (m, 5H), 6.89 - 6.82 (m, 6H), 6.77 - 6.74 (m, 1H), 6.67 - 6.61 (m, 1H), 4.11 (d,  $J = 10.0$  Hz, 1H), 3.92 - 3.87 (m, 2H), 3.49 - 3.42 (m, 2H), 2.93 (d,  $J = 17.3$  Hz, 1H), 2.43 (s, 3H), 2.32 - 2.24 (m, 4H), 2.21 - 2.13 (m, 1H), 0.95 (t,  $J = 7.6$  Hz, 3H).  $^{13}\text{C}$  NMR ( $\text{CDCl}_3$ , TMS, 150 MHz)  $\delta$  160.5 (d,  $J = 246.8$  Hz), 151.7, 140.5, 135.1, 132.6 (d,  $J = 42.9$  Hz), 131.8, 129.6, 129.5, 129.2 (d,  $J = 4.4$  Hz), 128.3 (d,  $J = 9.2$  Hz), 127.8, 127.6, 127.5, 127.3, 126.5, 123.4 (d,  $J = 2.4$  Hz), 116.0 (d,  $J = 23.6$  Hz), 71.5, 63.4, 57.0, 56.5, 46.4, 23.6, 21.6, 20.9, 11.5.  $^{19}\text{F}$  NMR ( $\text{CDCl}_3$ , TMS, 376 MHz)  $\delta$  -116.0 (s). IR (Acetone)  $\nu$  1029, 1170, 1325, 1422, 2981  $\text{cm}^{-1}$ . HRMS (ESI) calcd. for  $\text{C}_{35}\text{H}_{35}\text{NO}_2\text{S}_2\text{F}$  (M+H): 584.2088, Found: 584.2050.

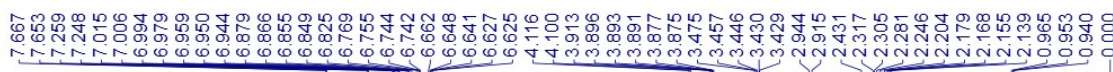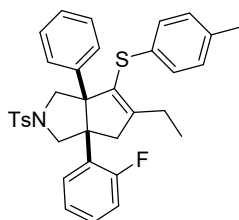

$^1\text{H}$  NMR ( $\text{CDCl}_3$ , 600MHz, TMS)

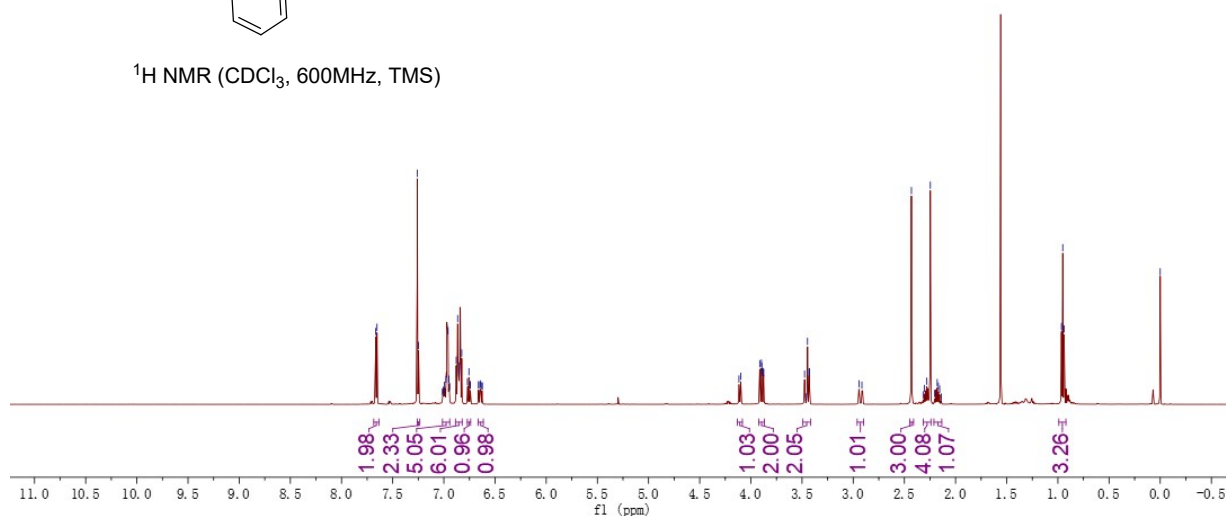



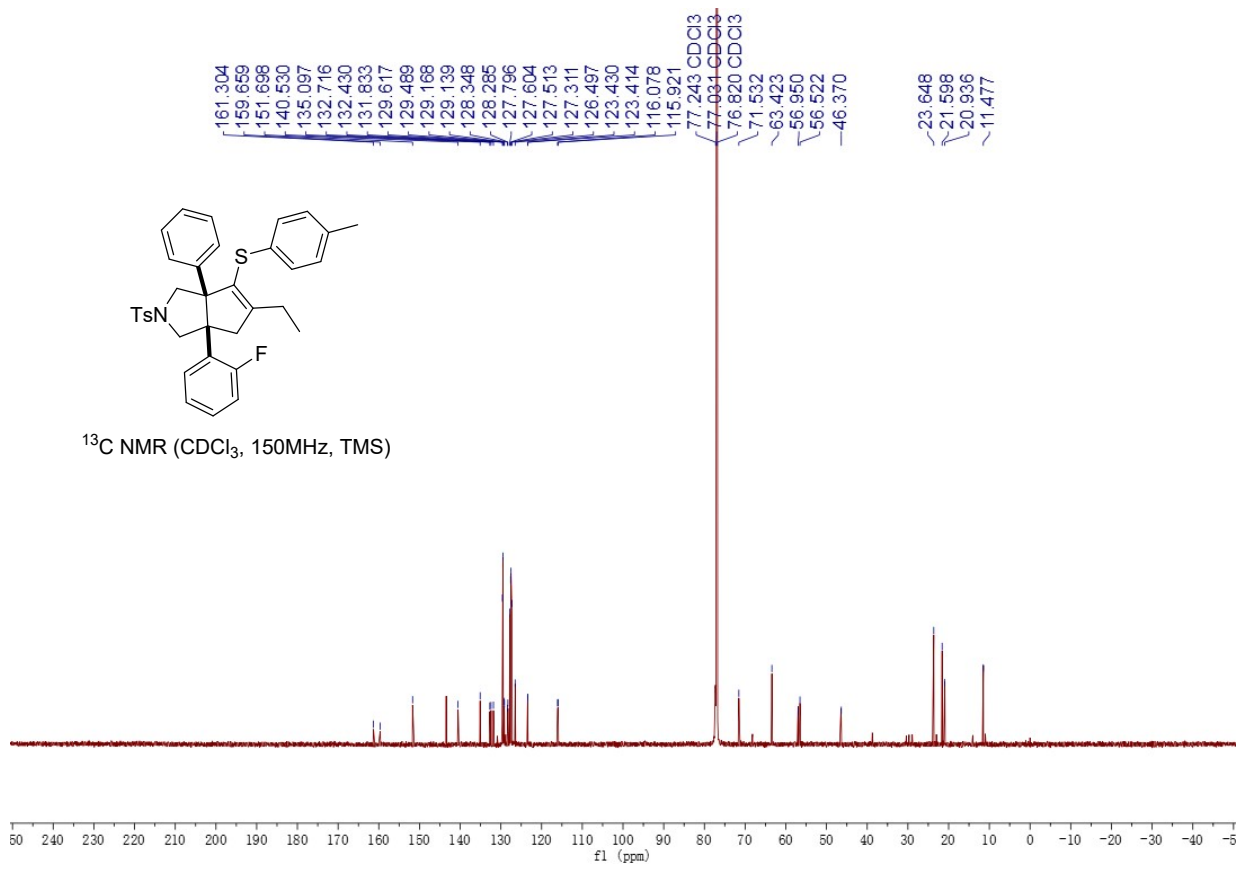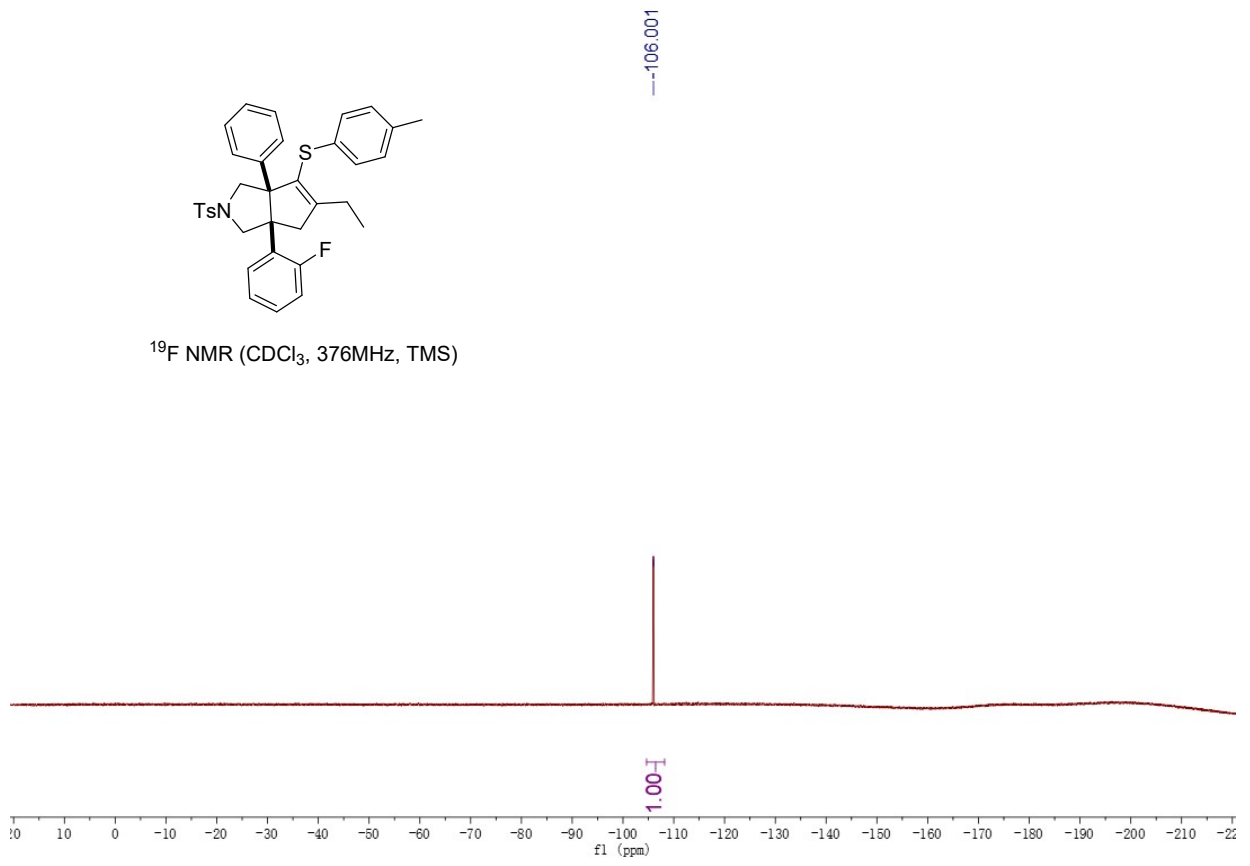

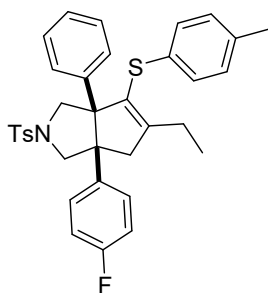

**5-ethyl-3a-(4-fluorophenyl)-6a-phenyl-6-(*p*-tolylthio)-2-tosyl-1,2,3,3a,4,6a-hexahydrocyclopenta[*c*]pyrrole (3pa)**

A colorless oil, 42.6 mg, 73% yield.  $^1\text{H}$  NMR ( $\text{CDCl}_3$ , TMS, 600 MHz)  $\delta$  7.72 (d,  $J = 8.3$  Hz, 2H), 7.32 (d,  $J = 8.0$  Hz, 2H), 6.98 - 6.92 (m, 3H), 6.87 - 6.81 (m, 4H), 6.75 - 6.70 (m, 4H), 6.64 - 6.57 (m, 2H), 4.12 (d,  $J = 10.4$  Hz, 1H), 3.94 (t,  $J = 10.1$  Hz, 2H), 3.40 (d,  $J = 10.0$  Hz, 1H), 3.22 (d,  $J = 16.9$  Hz, 1H), 2.72 (d,  $J = 16.9$  Hz, 1H), 2.47 (s, 3H), 2.35 - 2.29 (m, 1H), 2.26 - 2.19 (m, 4H), 0.96 (t,  $J = 7.6$  Hz, 3H).  $^{13}\text{C}$  NMR ( $\text{CDCl}_3$ , TMS, 150 MHz)  $\delta$  161.3 (d,  $J = 244.2$  Hz), 152.0, 143.5, 142.2, 135.6 (d,  $J = 3.5$  Hz), 133.3, 132.4, 131.6, 129.8, 129.5, 128.9 (d,  $J = 8.1$  Hz), 128.5, 127.9, 127.8, 126.9, 126.2, 114.4 (d,  $J = 20.7$  Hz), 70.8, 63.1, 59.0, 56.0, 44.8, 23.7, 21.6, 11.6.  $^{19}\text{F}$  NMR ( $\text{CDCl}_3$ , TMS, 376 MHz)  $\delta$  -106.0 (s). IR (Acetone)  $\nu$  1220, 1356, 1418, 1721, 3013  $\text{cm}^{-1}$ . HRMS (ESI) calcd. for  $\text{C}_{35}\text{H}_{34}\text{NFO}_2\text{NaS}_2$  ( $\text{M}+\text{Na}$ ): 606.1907, Found: 606.1907.

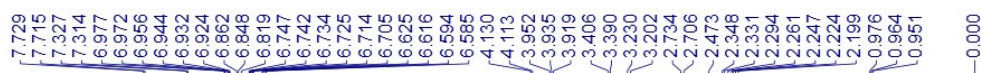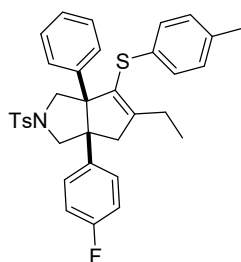

$^1\text{H}$  NMR ( $\text{CDCl}_3$ , 600MHz, TMS)

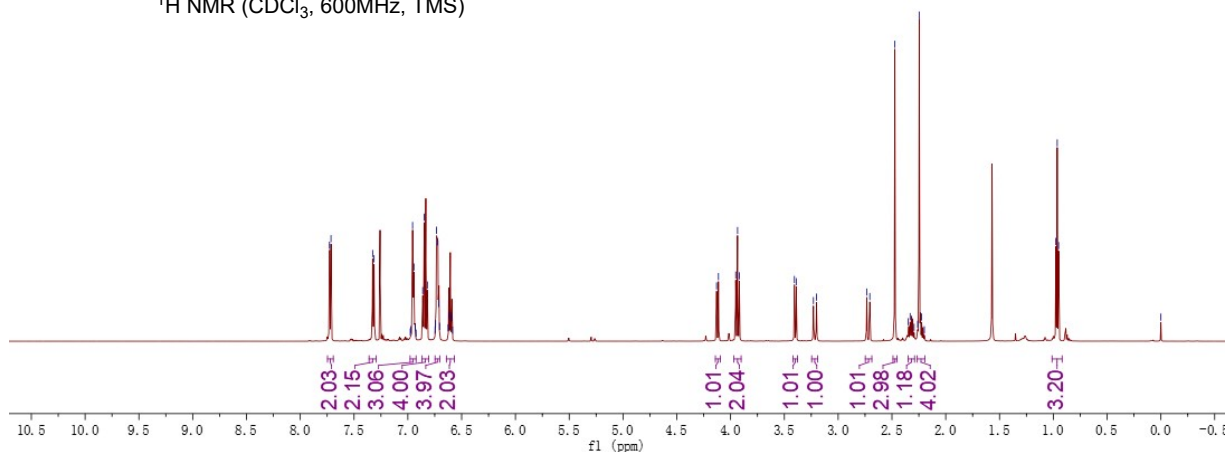

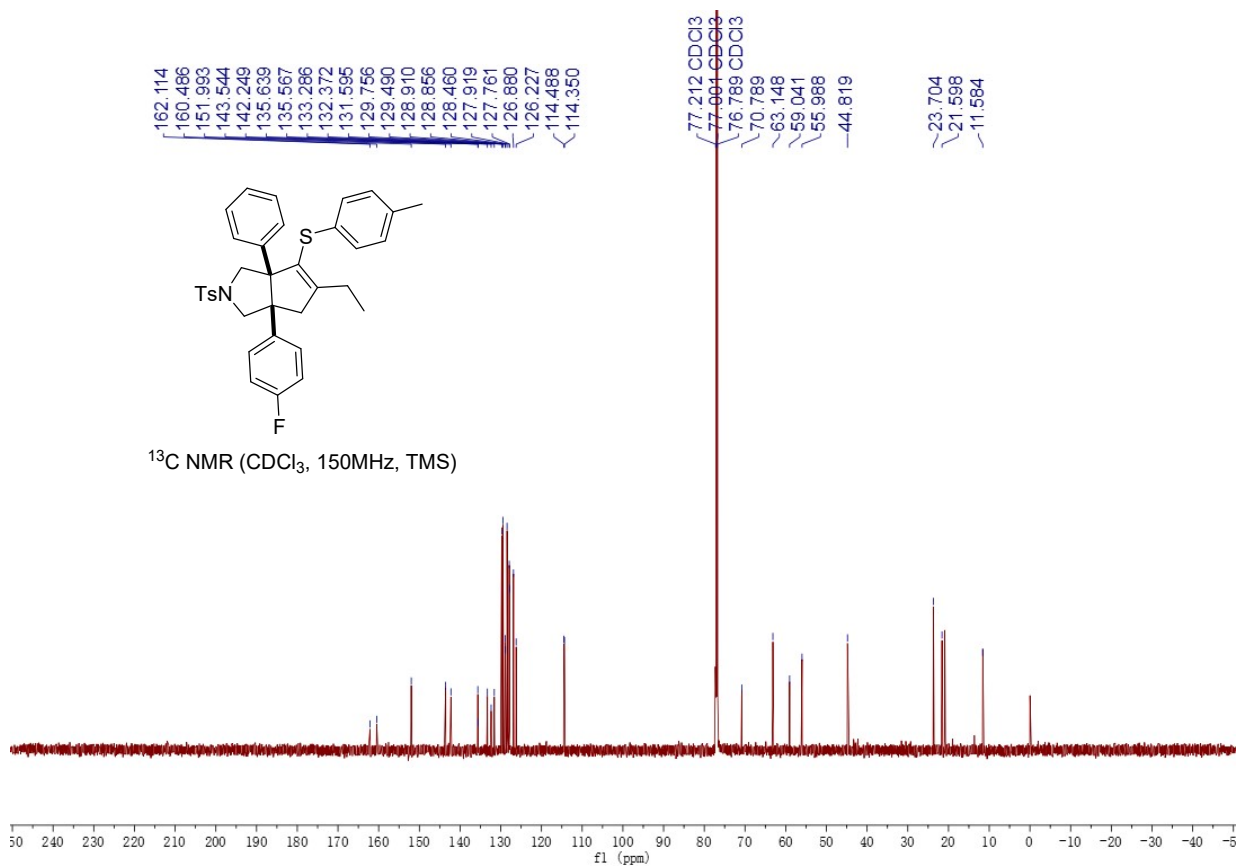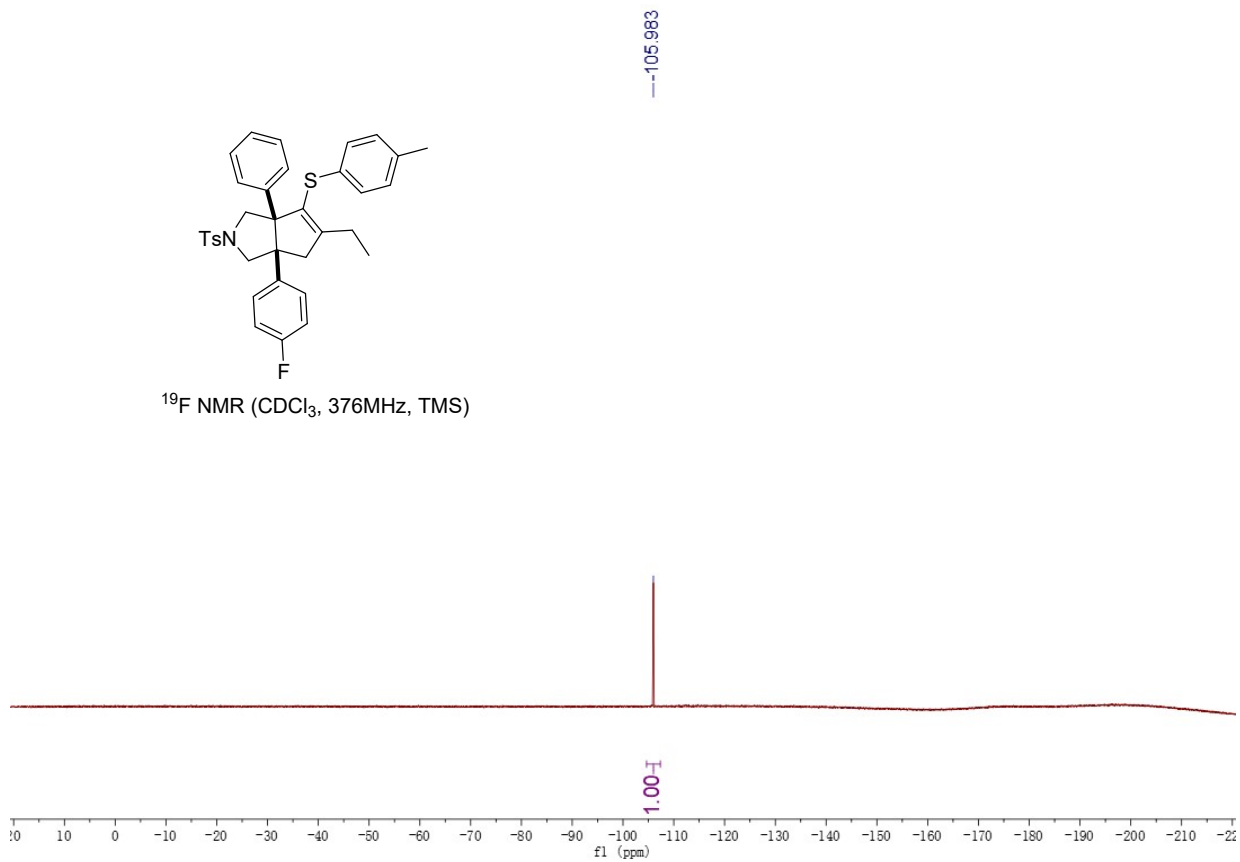

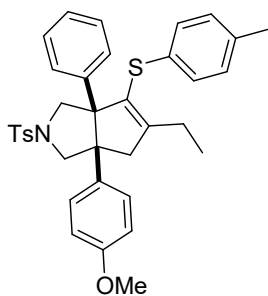

**5-ethyl-3a-(4-methoxyphenyl)-6a-phenyl-6-(*p*-tolylthio)-2-tosyl-1,2,3,3a,4,6a-hexahydrocyclopenta[*c*]pyrrole (3qa)**

A colorless oil, 51.8 mg, 87% yield.  $^1\text{H}$  NMR ( $\text{CDCl}_3$ , TMS, 600 MHz)  $\delta$  7.73 (d,  $J = 7.8$  Hz, 2H), 7.32 (d,  $J = 7.9$  Hz, 2H), 6.97 - 6.92 (m, 3H), 6.88 - 6.81 (m, 4H), 6.74 (d,  $J = 7.5$  Hz, 2H), 6.65 (d,  $J = 8.4$  Hz, 2H), 6.45 (d,  $J = 8.4$  Hz, 2H), 4.15 (d,  $J = 10.3$  Hz, 1H), 3.92 (t,  $J = 10.9$  Hz, 2H), 3.66 (s, 3H), 3.42 (d,  $J = 9.9$  Hz, 1H), 3.23 (d,  $J = 16.8$  Hz, 1H), 2.70 (d,  $J = 16.8$  Hz, 1H), 2.47 (s, 3H), 2.34 - 2.20 (m, 5H), 0.96 (t,  $J = 7.6$  Hz, 3H).  $^{13}\text{C}$  NMR ( $\text{CDCl}_3$ , TMS, 100 MHz)  $\delta$  157.6, 151.8, 143.4, 139.9, 135.3, 134.6, 133.5, 132.6, 132.1, 129.8, 129.5, 128.2, 128.0, 127.8, 127.7, 127.4, 126.4, 113.1, 71.2, 63.3, 58.6, 55.9, 55.1, 45.1, 23.7, 21.6, 21.0, 11.5. IR (Acetone)  $\nu$  1034, 1164, 1355, 1514, 2923  $\text{cm}^{-1}$ . HRMS (ESI) calcd. for  $\text{C}_{36}\text{H}_{38}\text{NO}_3\text{S}_2$  ( $\text{M}+\text{H}$ ): 596.2288, Found: 596.2250.

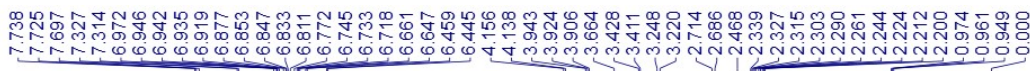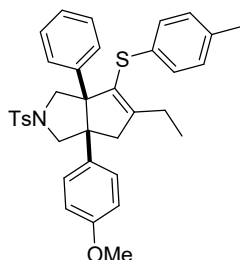

$^1\text{H}$  NMR ( $\text{CDCl}_3$ , 600MHz, TMS)

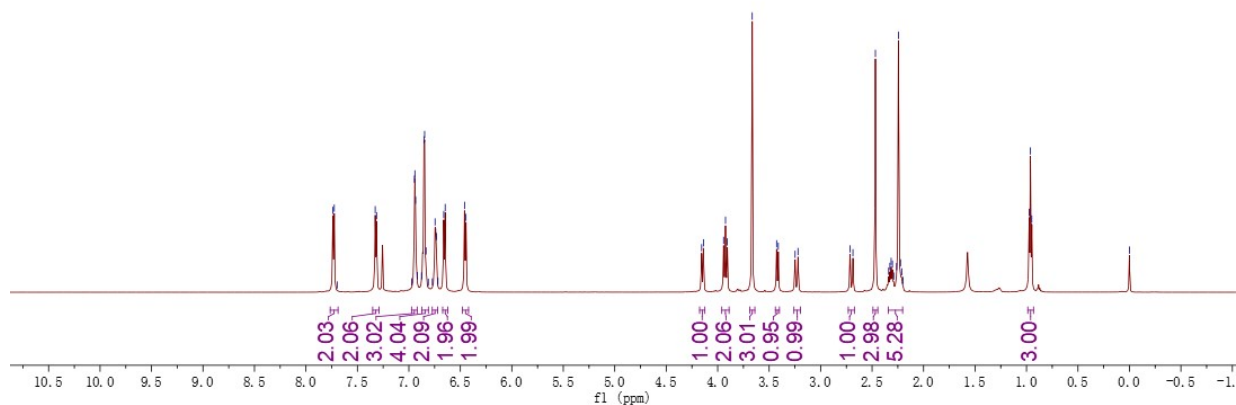

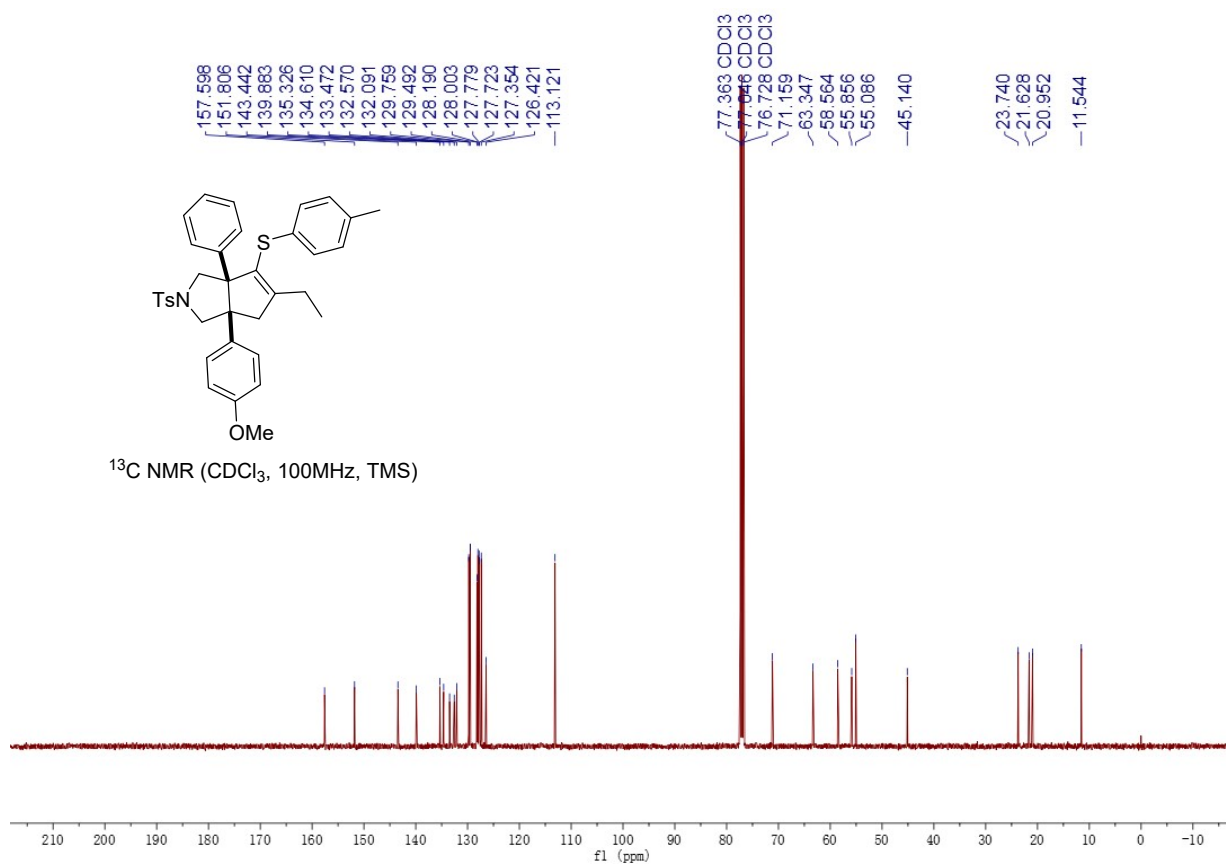

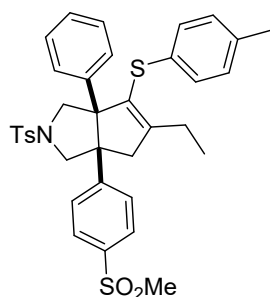

**5-ethyl-3a-(4-(methylsulfonyl)phenyl)-6a-phenyl-6-(*p*-tolylthio)-2-tosyl-1,2,3,3a,4,6a-hexahydrocyclopenta[*c*]pyrrole (3ra)**

A colorless oil, 53.4 mg, 83% yield.  $^1\text{H}$  NMR ( $\text{CDCl}_3$ , TMS, 600 MHz)  $\delta$  7.72 (d,  $J = 8.3$  Hz, 2H), 7.51 (d,  $J = 8.5$  Hz, 2H), 7.33 (d,  $J = 7.9$  Hz, 2H), 7.02 (d,  $J = 8.6$  Hz, 2H), 6.96 - 6.90 (m, 3H), 6.84 (d,  $J = 7.9$  Hz, 2H), 6.78 (d,  $J = 8.3$  Hz, 2H), 6.74 - 6.70 (m, 2H), 4.09 (d,  $J = 10.6$  Hz, 1H), 4.00 (d,  $J = 10.6$  Hz, 1H), 3.95 (d,  $J = 10.0$  Hz, 1H), 3.36 (d,  $J = 10.0$  Hz, 1H), 3.26 (d,  $J = 16.9$  Hz, 1H), 2.93 (s, 3H), 2.79 (d,  $J = 17.0$  Hz, 1H), 2.49 (s, 3H), 2.35 - 2.29 (m, 1H), 2.28 - 2.20 (m, 4H), 0.97 (t,  $J = 7.6$  Hz, 3H).  $^{13}\text{C}$  NMR ( $\text{CDCl}_3$ , TMS, 150 MHz)  $\delta$  150.8, 149.1, 143.9, 139.6, 138.1, 135.7, 132.9, 132.8, 131.4, 129.9, 129.5, 128.4, 128.05, 127.98, 127.8, 127.2, 126.9, 126.8, 71.6, 62.5, 59.2, 56.1, 45.1, 44.5, 23.6, 21.6, 20.9, 11.5. IR (Acetone)  $\nu$  1020, 1184, 1298, 1431, 2950  $\text{cm}^{-1}$ . HRMS (ESI) calcd. for  $\text{C}_{36}\text{H}_{38}\text{NO}_4\text{S}_3$  ( $\text{M}+\text{H}$ ): 644.1957, Found: 644.1918.

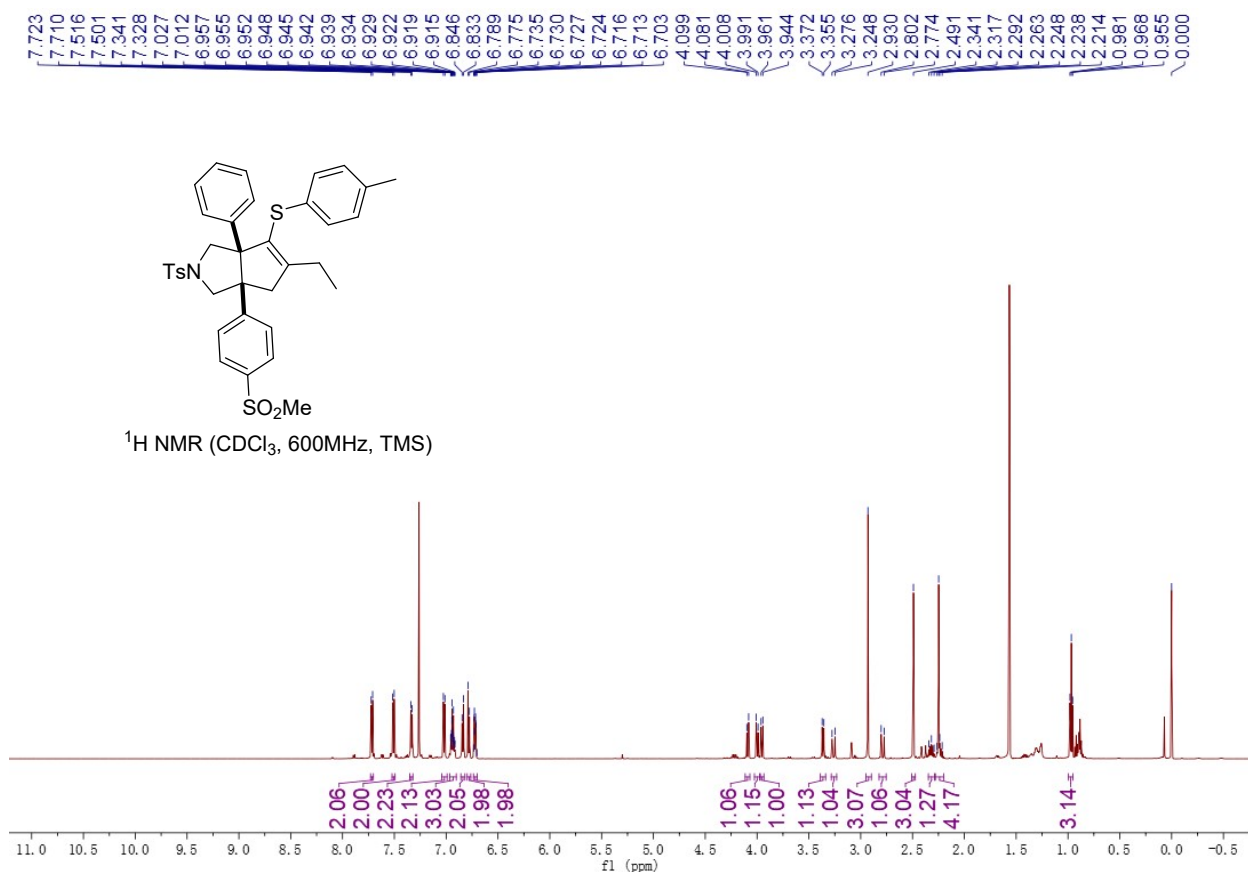

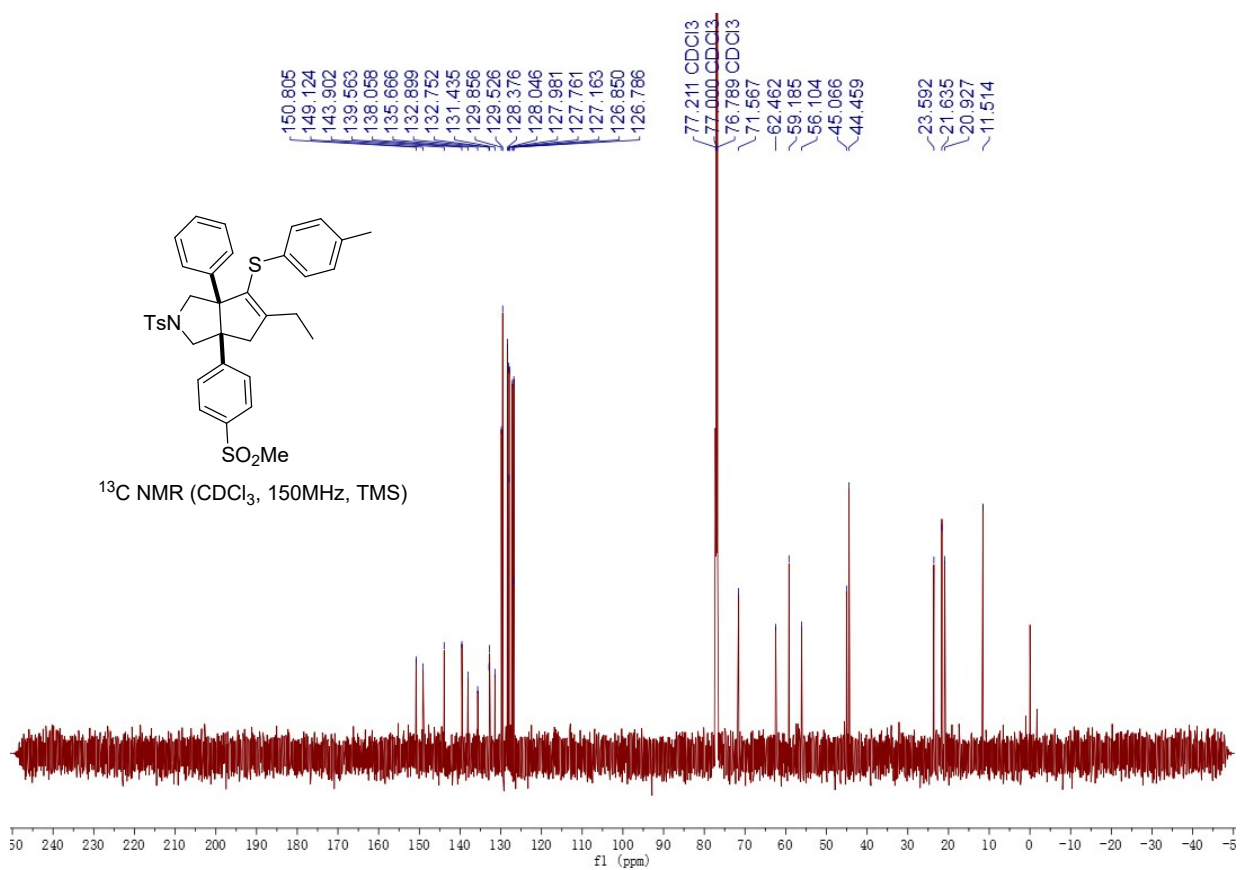

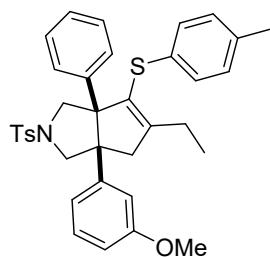

**5-ethyl-3a-(3-methoxyphenyl)-6a-phenyl-6-(p-tolylthio)-2-tosyl-1,2,3,3a,4,6a-hexahydrocyclopenta[c]pyrrole (3sa)**

A colorless oil, 48.9 mg, 82% yield.  $^1\text{H}$  NMR ( $\text{CDCl}_3$ , TMS, 600 MHz)  $\delta$  7.71 (d,  $J = 8.2$  Hz, 2H), 7.30 (d,  $J = 8.0$  Hz, 2H), 6.97 - 6.92 (m, 3H), 6.89 - 6.82 (m, 5H), 6.79 - 6.74 (m, 2H), 6.55 - 6.48 (m, 1H), 6.38 - 6.32 (m, 2H), 4.18 (d,  $J = 10.3$  Hz, 1H), 3.94 (d,  $J = 10.3$  Hz, 2H), 3.52 (s, 3H), 3.45 (d,  $J = 9.9$  Hz, 1H), 3.27 (d,  $J = 16.9$  Hz, 1H), 2.75 (d,  $J = 16.9$  Hz, 1H), 2.45 (s, 3H), 2.35 - 2.29 (m, 1H), 2.27 - 2.18 (m, 4H), 0.96 (t,  $J = 7.6$  Hz, 3H).  $^{13}\text{C}$  NMR ( $\text{CDCl}_3$ , TMS, 100 MHz)  $\delta$  157.6, 151.8, 143.4, 139.9, 135.3, 134.6, 133.5, 132.6, 132.1, 129.8, 129.5, 128.2, 128.0, 127.8, 127.7, 127.4, 126.4, 113.1, 71.2, 63.3, 58.6, 55.9, 55.1, 45.1, 23.7, 21.6, 21.0, 11.5. IR (Acetone)  $\nu$  1018, 1179, 1338, 1521, 3000  $\text{cm}^{-1}$ . HRMS (ESI) calcd. for  $\text{C}_{36}\text{H}_{38}\text{NO}_3\text{S}_2$  (M+H): 596.2288, Found: 596.2250.

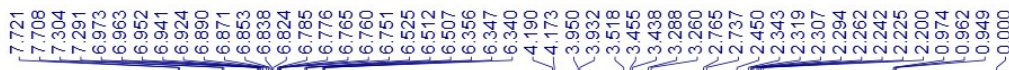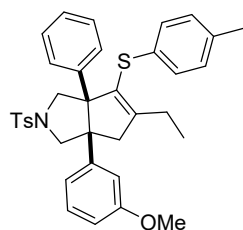

$^1\text{H}$  NMR ( $\text{CDCl}_3$ , 600MHz, TMS)

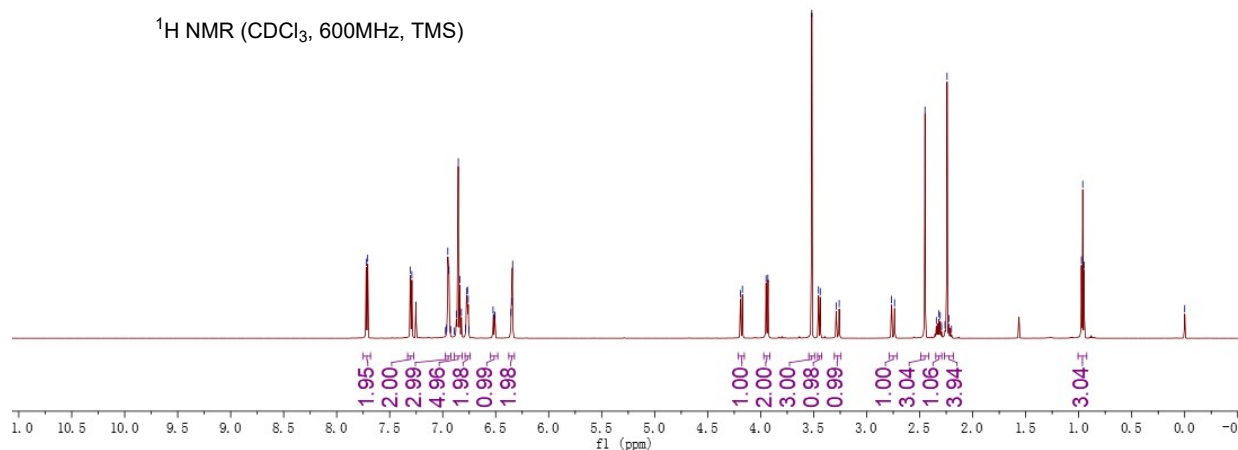



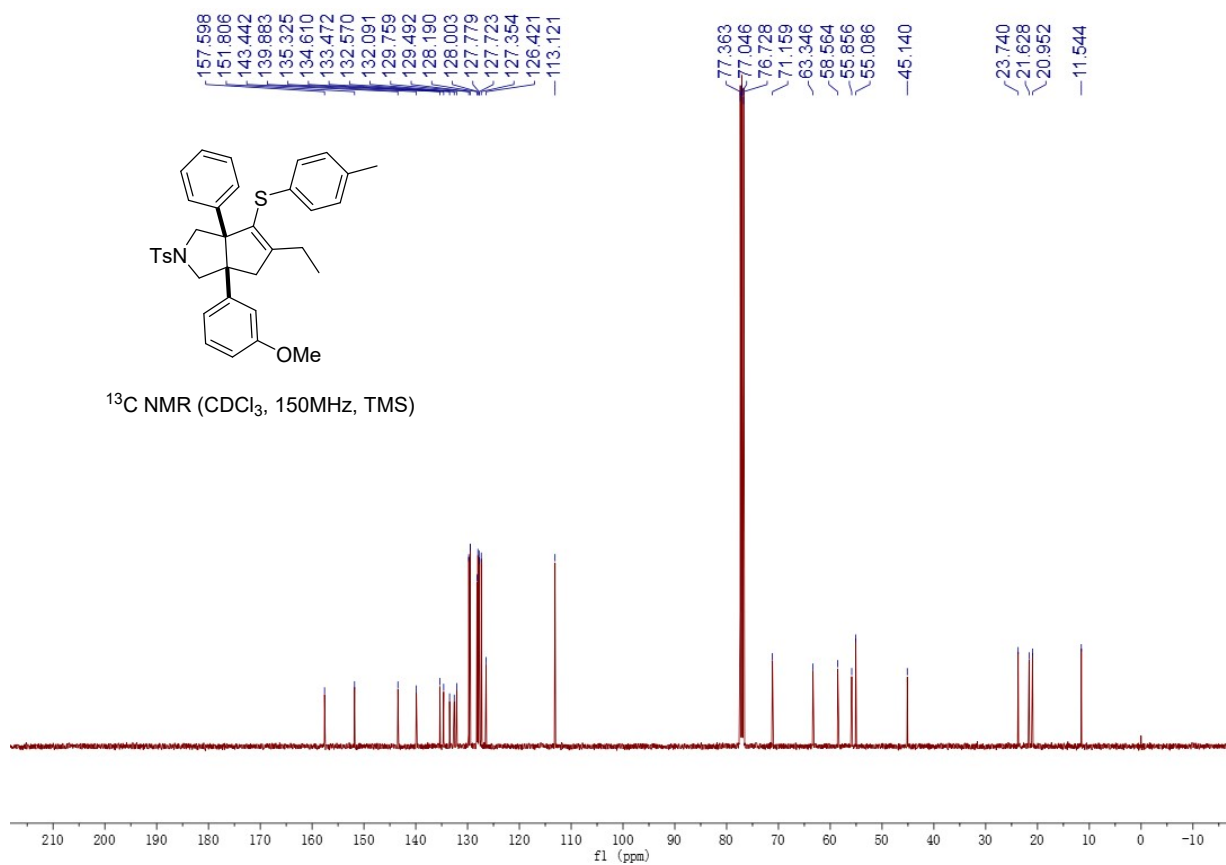

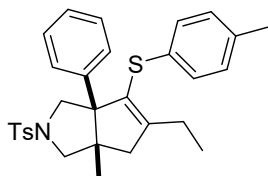

**5-ethyl-3a-methyl-6a-phenyl-6-(*p*-tolylthio)-2-tosyl-1,2,3,3a,4,6a-hexahydrocyclopenta[*c*]pyrrole (3ta)**

A colorless oil, 20.7 mg, 41% yield.  $^1\text{H}$  NMR ( $\text{CDCl}_3$ , TMS, 600 MHz)  $\delta$  7.67 (d,  $J = 8.3$  Hz, 2H), 7.32 (d,  $J = 8.0$  Hz, 2H), 7.26 - 7.23 (m, 2H), 7.21 - 7.18 (m, 1H), 7.06 - 7.03 (m, 2H), 6.96 - 6.93 (m, 2H), 6.92 - 6.89 (m, 2H), 3.65 (d,  $J = 10.3$  Hz, 1H), 3.60 (d,  $J = 10.3$  Hz, 1H), 3.17 (d,  $J = 9.3$  Hz, 1H), 3.13 (d,  $J = 9.3$  Hz, 1H), 2.47 (s, 3H), 2.45 - 2.40 (m, 2H), 2.36 - 2.27 (m, 4H), 2.18 - 2.10 (m, 1H), 0.96 (t,  $J = 7.6$  Hz, 3H), 0.63 (s, 3H).  $^{13}\text{C}$  NMR ( $\text{CDCl}_3$ , TMS, 150 MHz)  $\delta$  152.4, 143.5, 139.7, 135.4, 132.1, 131.9, 130.9, 129.64, 129.55, 128.5, 128.3, 128.1, 127.3, 126.9, 69.9, 62.7, 55.7, 51.0, 47.2, 24.0, 23.5, 21.7, 21.0, 11.7. IR (Acetone)  $\nu$  1018, 1163, 1305, 1412, 2993  $\text{cm}^{-1}$ . HRMS (ESI) calcd. for  $\text{C}_{30}\text{H}_{34}\text{NO}_2\text{S}_2$  (M+H): 504.2025, Found: 504.1979.

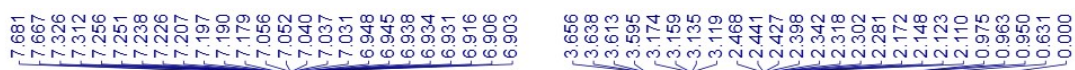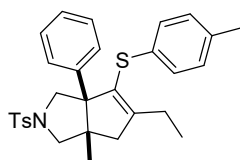

$^1\text{H}$  NMR ( $\text{CDCl}_3$ , 600MHz, TMS)

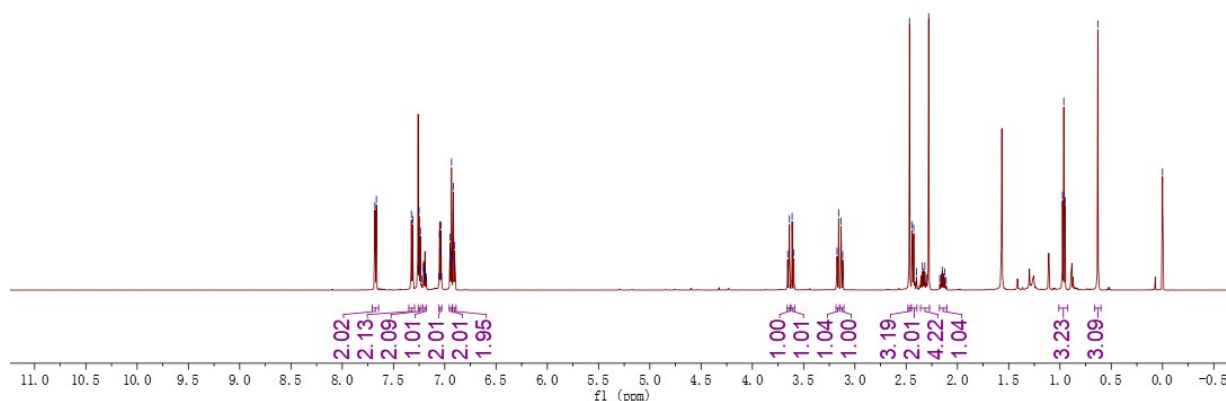

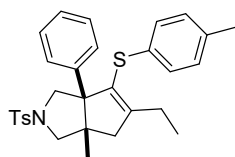

$^{13}\text{C}$  NMR ( $\text{CDCl}_3$ , 150MHz, TMS)

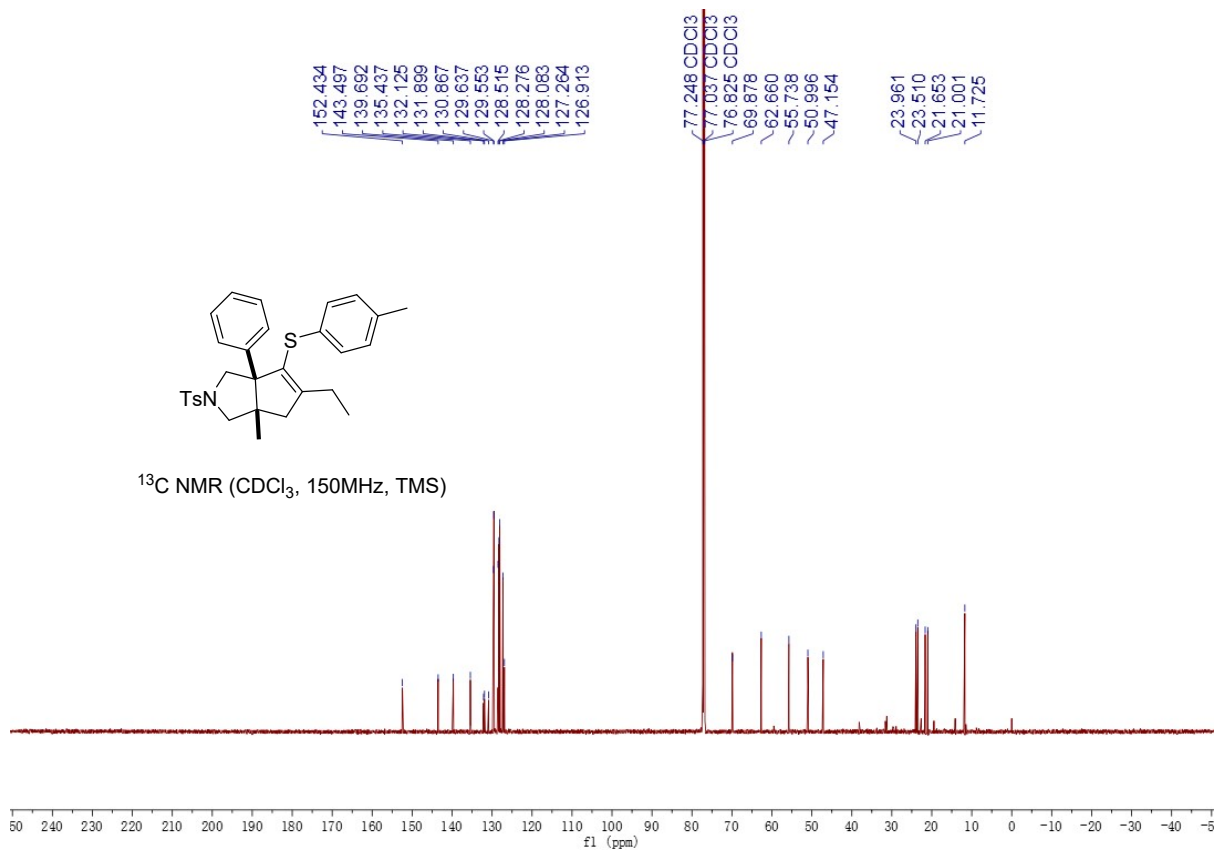

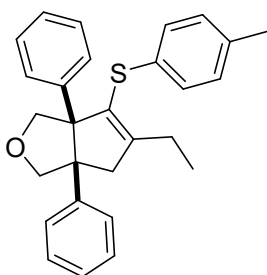

**5-ethyl-3a,6a-diphenyl-6-(*p*-tolylthio)-3,3a,4,6a-tetrahydro-1*H*-cyclopenta[*c*]furan (3ua)**

A colorless oil, 16.9 mg, 43% yield.  $^1\text{H}$  NMR ( $\text{CDCl}_3$ , TMS, 400 MHz)  $\delta$  7.08 - 6.96 (m, 12H), 6.84 - 6.79 (m, 2H), 4.54 (d,  $J = 9.5$  Hz, 1H), 4.50 (d,  $J = 9.4$  Hz, 1H), 4.43 (d,  $J = 8.8$  Hz, 1H), 4.13 (d,  $J = 8.8$  Hz, 1H), 3.41 (d,  $J = 17.0$  Hz, 1H), 2.83 (d,  $J = 17.0$  Hz, 1H), 2.52 - 2.42 (m, 1H), 2.39 - 2.33 (m, 1H), 2.26 (s, 3H), 1.08 (t,  $J = 7.6$  Hz, 3H).  $^{13}\text{C}$  NMR ( $\text{CDCl}_3$ , TMS, 150 MHz)  $\delta$  152.7, 143.4, 140.0, 135.1, 133.2, 132.0, 129.5, 127.8, 127.7, 127.6, 127.5, 126.2, 125.8, 84.7, 75.5, 73.6, 60.1, 44.4, 23.8, 20.9, 11.8. IR (Acetone)  $\nu$  1167, 1221, 1359, 1420, 1709, 3011  $\text{cm}^{-1}$ . HRMS (ESI) calcd. for  $\text{C}_{28}\text{H}_{29}\text{OS}$  (M+H): 413.1934, Found: 413.1902.

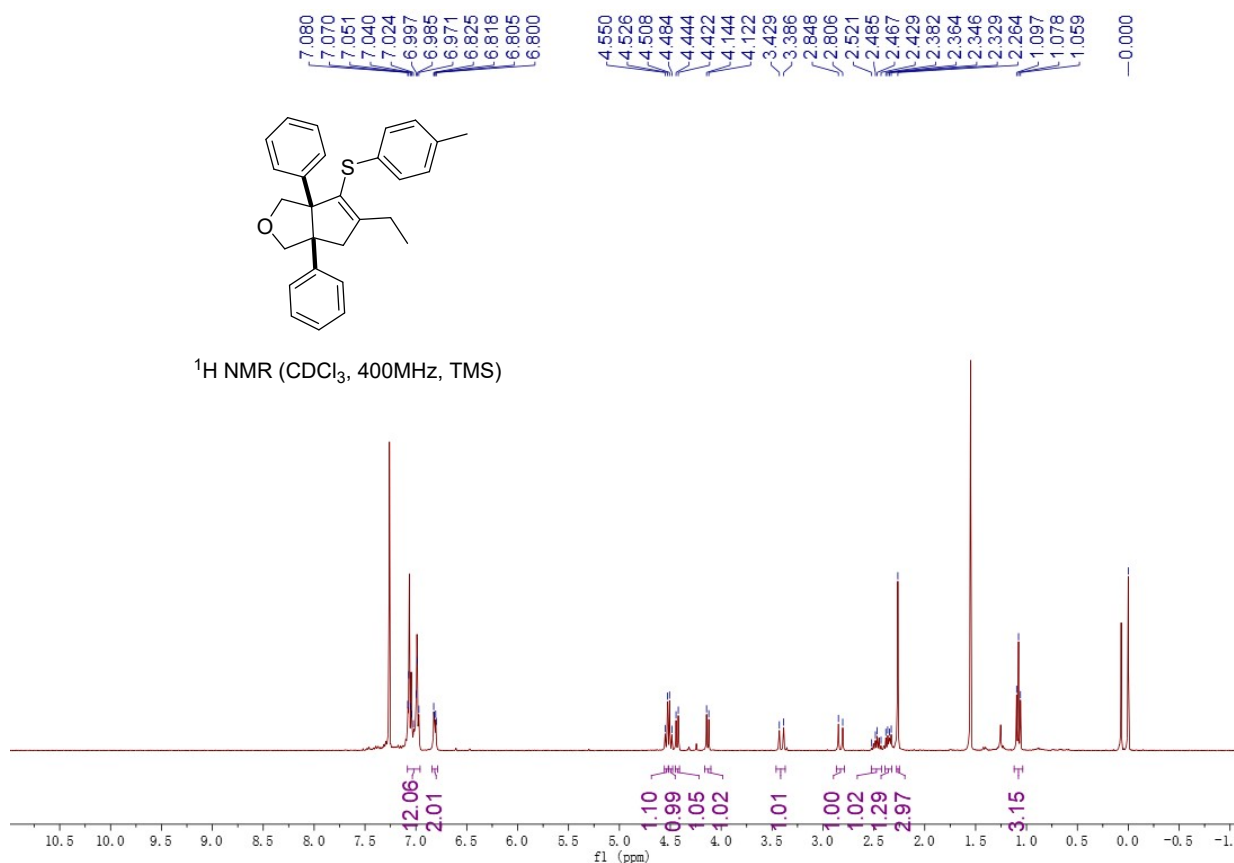

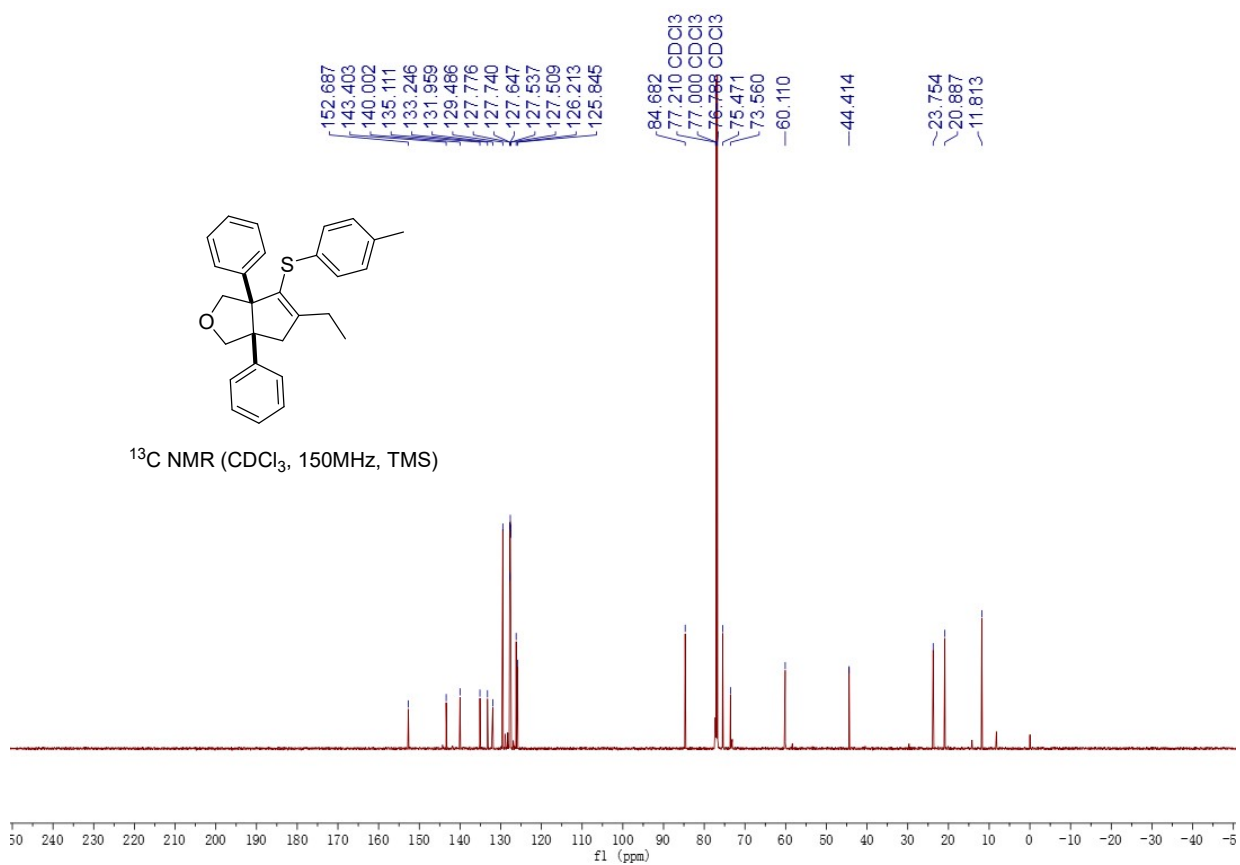

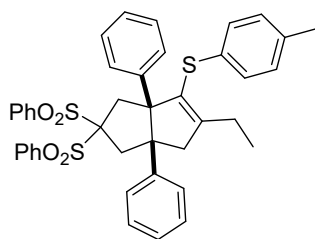

**(2-ethyl-3a,6a-diphenyl-5,5-bis(phenylsulfonyl)-3,3a,4,5,6,6a-hexahydropentalen-1-yl)(*p*-tolyl)sulfane (3va)**

A colorless oil, 36.6 mg, 45% yield.  $^1\text{H}$  NMR ( $\text{CDCl}_3$ , TMS, 400 MHz)  $\delta$  8.44 (d,  $J = 7.8$  Hz, 2H), 7.77 - 7.73 (m, 1H), 7.69 - 7.63 (m, 2H), 7.58 - 7.52 (m, 1H), 7.35 - 7.30 (m, 2H), 7.24 (d,  $J = 7.7$  Hz, 2H), 7.19 - 7.15 (m, 3H), 7.06 - 7.00 (m, 4H), 6.99 - 6.95 (m, 3H), 6.67 (d,  $J = 8.0$  Hz, 2H), 6.45 (d,  $J = 8.2$  Hz, 2H), 3.98 (d,  $J = 16.3$  Hz, 1H), 3.70 (d,  $J = 16.3$  Hz, 1H), 3.44 (d,  $J = 16.3$  Hz, 1H), 3.31 (s, 2H), 2.67 (d,  $J = 16.3$  Hz, 1H), 2.53 - 2.38 (m, 1H), 2.30 - 2.18 (m, 1H), 2.14 (s, 3H), 1.01 (t,  $J = 7.6$  Hz, 3H).  $^{13}\text{C}$  NMR ( $\text{CDCl}_3$ , TMS, 100 MHz)  $\delta$  149.3, 143.6, 137.2, 136.6, 135.3, 134.7, 134.3, 134.0, 132.4, 131.4, 130.0, 128.8, 128.4, 128.3, 127.8, 127.6, 127.1, 126.3, 125.9, 94.9, 71.1, 60.5, 51.4, 50.9, 39.5, 29.7, 23.7, 20.8, 11.1. IR (Acetone)  $\nu$  1073, 1145, 1328, 1446, 1492.67, 2915  $\text{cm}^{-1}$ . HRMS (ESI) calcd. for  $\text{C}_{41}\text{H}_{39}\text{S}_3\text{O}_4$  ( $\text{M}+\text{H}$ ): 691.2005, Found: 691.1938.

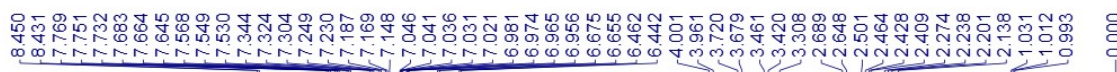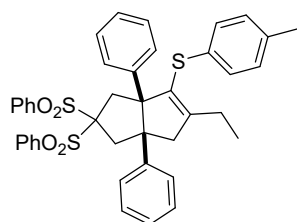

$^1\text{H}$  NMR ( $\text{CDCl}_3$ , 400MHz, TMS)

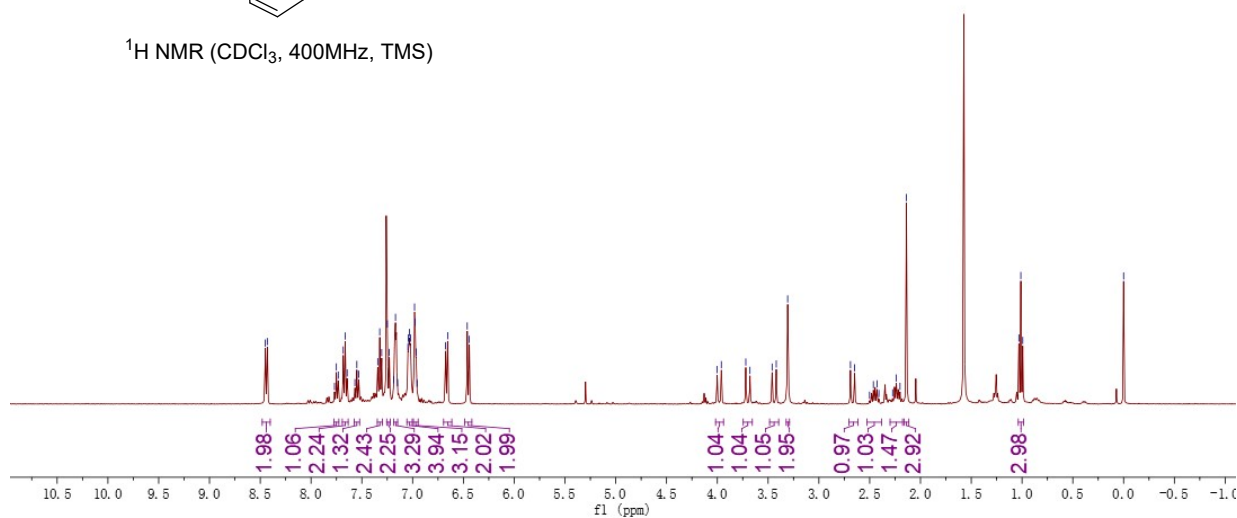

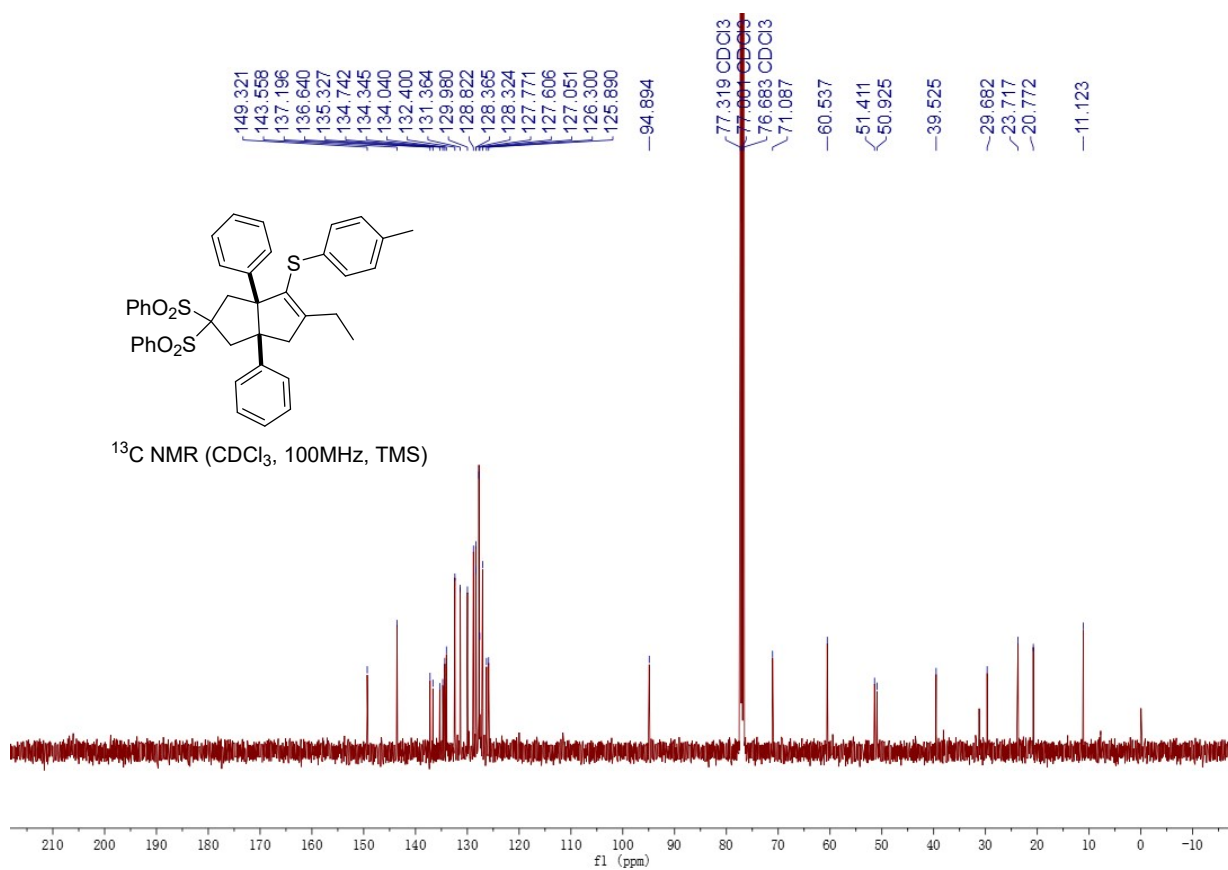

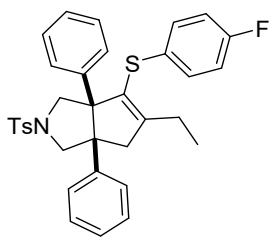

**5-ethyl-6-((4-fluorophenyl)thio)-3a,6a-diphenyl-2-tosyl-1,2,3,3a,4,6a-hexahydrocyclopenta[c]pyrrole (3ab)**

A colorless oil, 44.4 mg, 78% yield.  $^1\text{H}$  NMR ( $\text{CDCl}_3$ , TMS, 600 MHz)  $\delta$  7.73 (d,  $J = 8.2$  Hz, 2H), 7.32 (d,  $J = 8.0$  Hz, 2H), 6.98 - 6.89 (m, 8H), 6.76 - 6.69 (m, 6H), 4.18 (d,  $J = 10.3$  Hz, 1H), 3.95 (d,  $J = 10.3$  Hz, 1H), 3.92 (d,  $J = 10.0$  Hz, 1H), 3.45 (d,  $J = 10.0$  Hz, 1H), 3.33 (d,  $J = 16.9$  Hz, 1H), 2.76 (d,  $J = 16.9$  Hz, 1H), 2.47 (s, 3H), 2.40 - 2.27 (m, 2H), 1.00 (t,  $J = 7.6$  Hz, 3H).  $^{13}\text{C}$  NMR ( $\text{CDCl}_3$ , TMS, 150 MHz)  $\delta$  161.2 (d,  $J = 244.1$  Hz), 152.8, 143.6, 142.4, 139.5, 133.3, 132.6, 130.6 (d,  $J = 2.9$  Hz), 130.1 (d,  $J = 8.5$  Hz), 129.8, 127.9, 127.74, 127.71, 127.2, 126.9, 126.6, 126.1, 115.8 (d,  $J = 22.1$  Hz), 71.1, 63.5, 59.0, 55.5, 44.9, 23.8, 21.6, 11.6.  $^{19}\text{F}$  NMR ( $\text{CDCl}_3$ , TMS, 564 MHz)  $\delta$  -116.6 (s). IR (Acetone)  $\nu$  1097, 1161, 1222, 1342, 1489, 2849  $\text{cm}^{-1}$ . HRMS (ESI) calcd. for  $\text{C}_{34}\text{H}_{33}\text{O}_2\text{NFS}_2$  (M+H): 570.1931, Found: 570.1896.

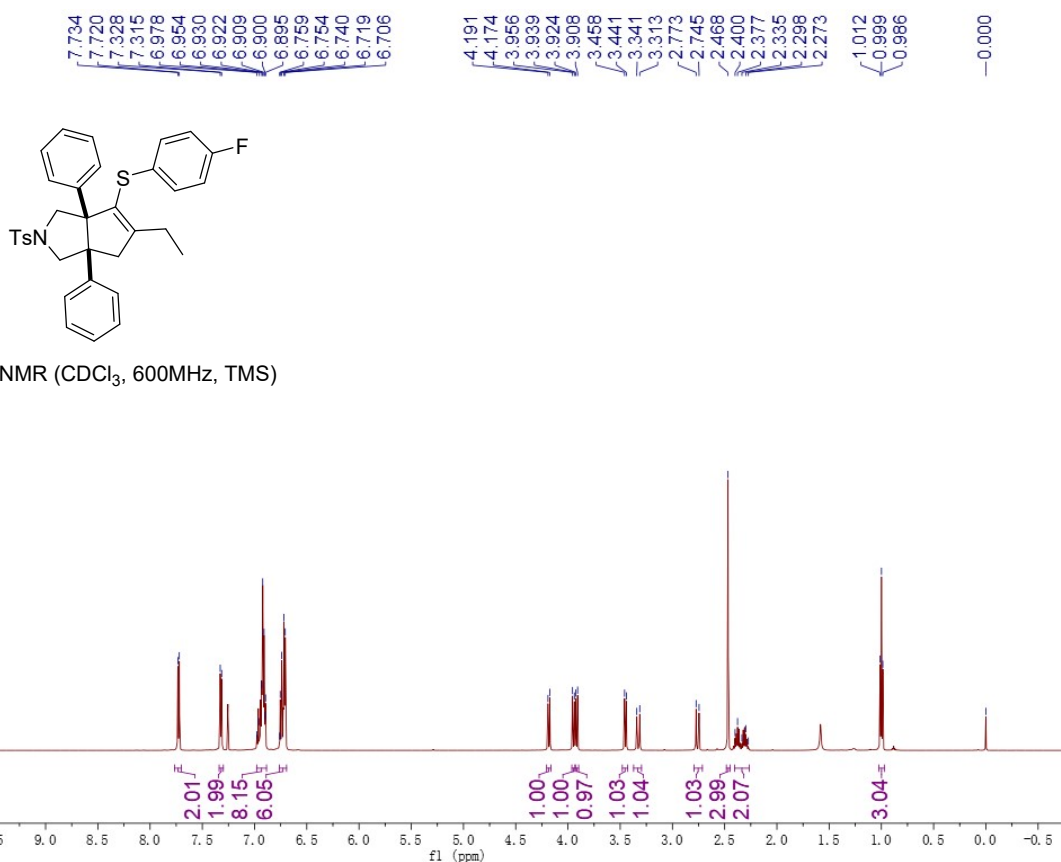



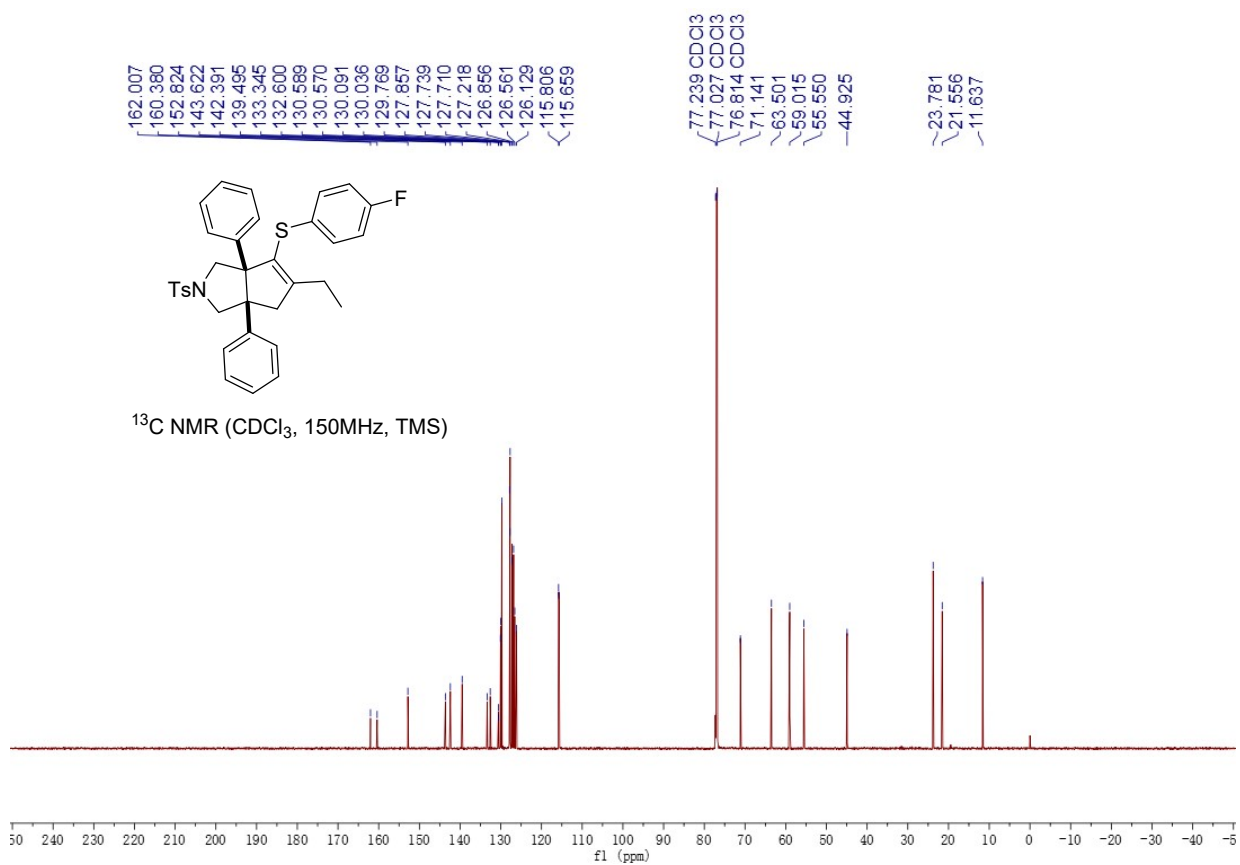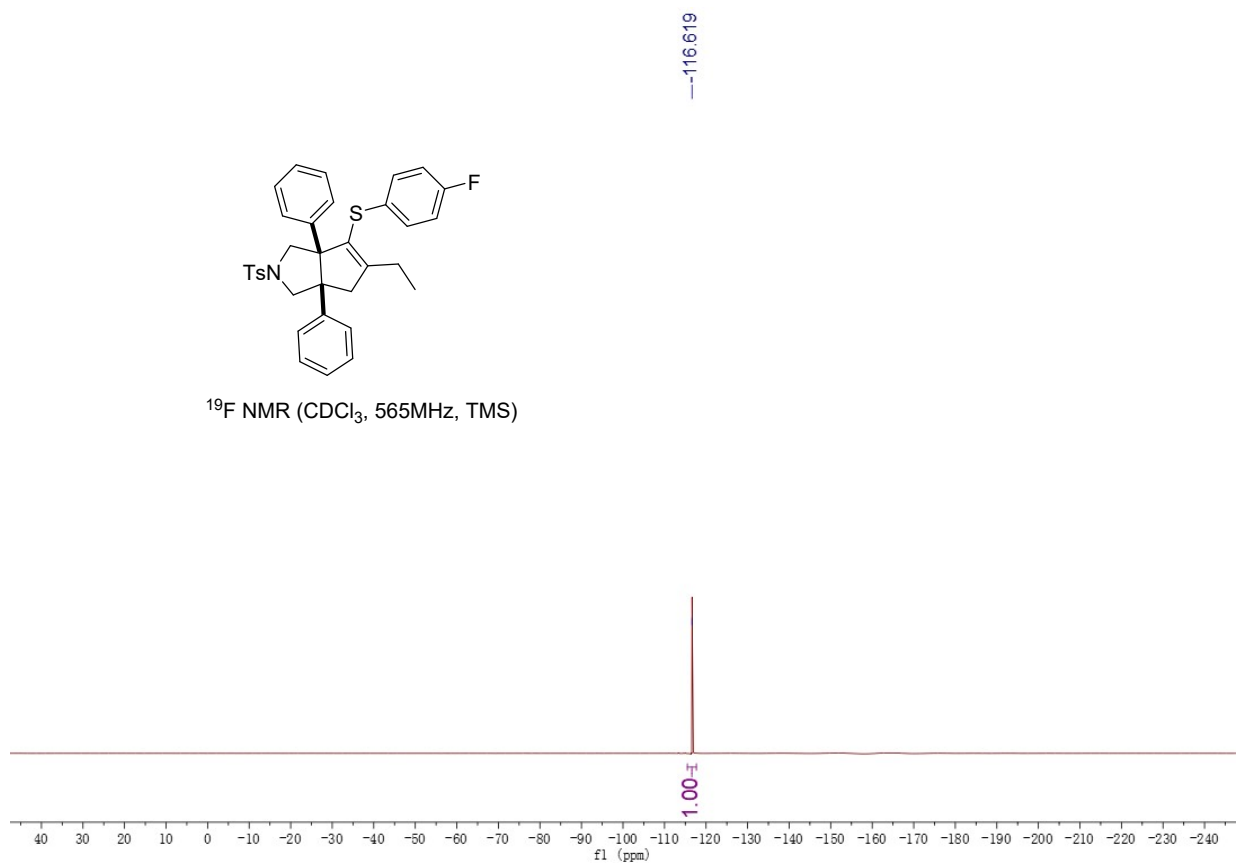

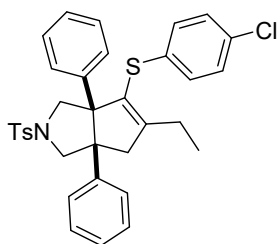

**6-((4-chlorophenyl)thio)-5-ethyl-3a,6a-diphenyl-2-tosyl-1,2,3,3a,4,6a-hexahydrocyclopenta[c]pyrrole (3ac)**

A colorless oil, 47.4 mg, 81% yield.  $^1\text{H}$  NMR ( $\text{CDCl}_3$ , TMS, 600 MHz)  $\delta$  7.72 (d,  $J = 8.3$  Hz, 2H), 7.32 (d,  $J = 8.0$  Hz, 2H), 7.01 - 6.90 (m, 8H), 6.88 - 6.83 (m, 2H), 6.75 - 6.69 (m, 4H), 4.15 (d,  $J = 10.3$  Hz, 1H), 3.96 (d,  $J = 10.4$  Hz, 1H), 3.93 (d,  $J = 10.0$  Hz, 1H), 3.46 (d,  $J = 10.0$  Hz, 1H), 3.34 (d,  $J = 16.9$  Hz, 1H), 2.79 (d,  $J = 17.0$  Hz, 1H), 2.48 (s, 3H), 2.39 - 2.22 (m, 2H), 1.01 (t,  $J = 7.6$  Hz, 3H).  $^{13}\text{C}$  NMR ( $\text{CDCl}_3$ , TMS, 150 MHz)  $\delta$  153.6, 143.6, 142.4, 139.5, 134.5, 133.2, 131.7, 131.1, 129.8, 128.7, 128.6, 127.9, 127.8, 127.7, 127.2, 126.9, 126.6, 126.1, 71.2, 63.5, 58.9, 55.7, 45.1, 23.8, 21.6, 11.6. IR (Acetone)  $\nu$  1090, 1165, 1345, 1472, 2967  $\text{cm}^{-1}$ . HRMS (ESI) calcd. for  $\text{C}_{34}\text{H}_{33}\text{O}_2\text{NS}_2\text{Cl}$  (M+H): 586.1636, Found: 586.1601.

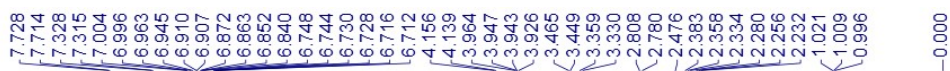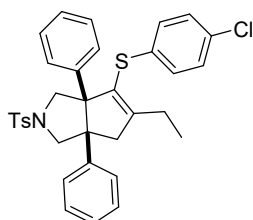

$^1\text{H}$  NMR ( $\text{CDCl}_3$ , 600MHz, TMS)

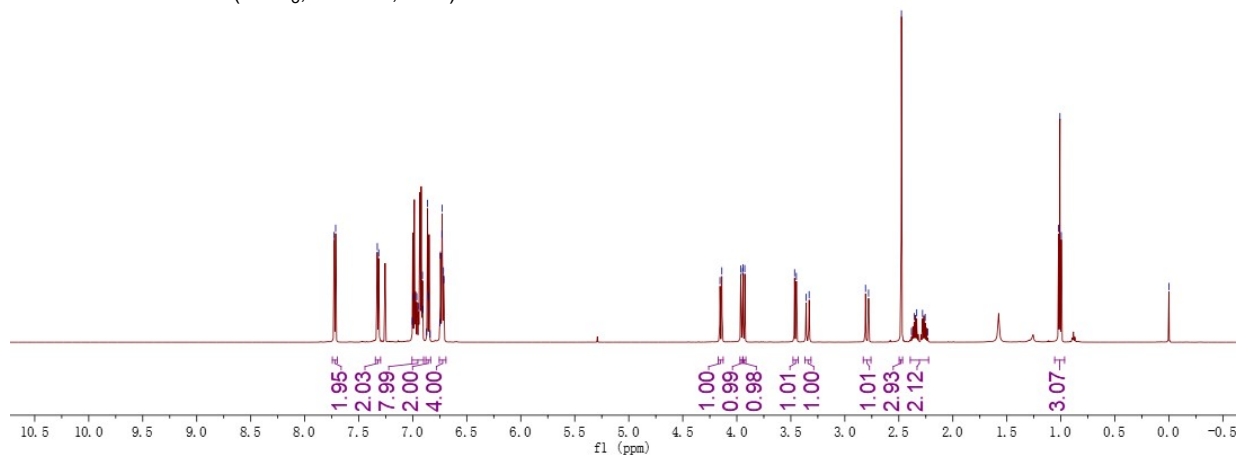

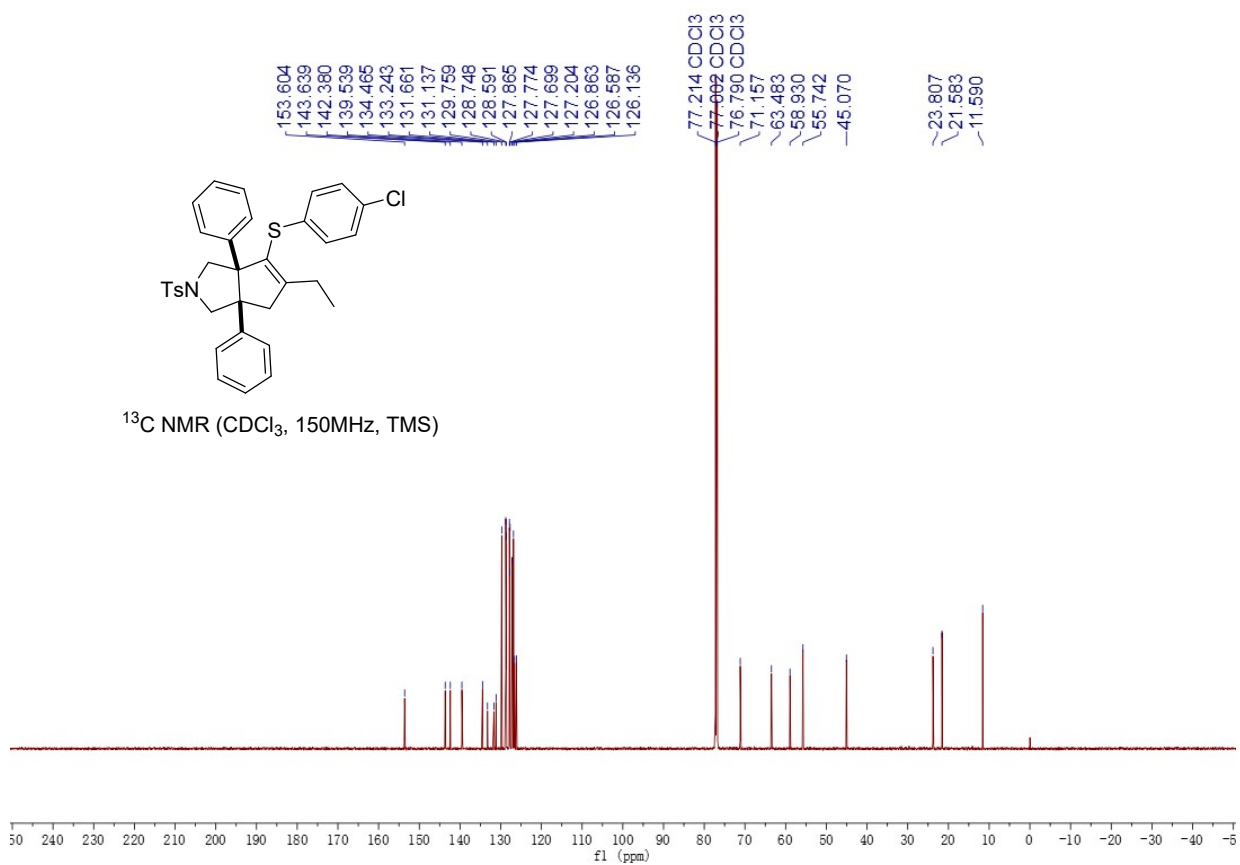

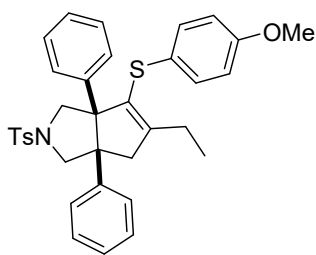

**5-ethyl-6-((4-methoxyphenyl)thio)-3a,6a-diphenyl-2-tosyl-1,2,3,3a,4,6a-hexahydrocyclopenta[c]pyrrole (3ad)**

A colorless oil, 37.8 mg, 65% yield.  $^1\text{H}$  NMR ( $\text{CDCl}_3$ , TMS, 600 MHz)  $\delta$  7.74 (d,  $J = 8.1$  Hz, 2H), 7.33 (d,  $J = 8.0$  Hz, 2H), 6.97 - 6.87 (m, 8H), 6.74 - 6.69 (m, 4H), 6.61 (d,  $J = 8.8$  Hz, 2H), 4.20 (d,  $J = 10.3$  Hz, 1H), 3.94 (dd,  $J = 12.6, 10.1$  Hz, 2H), 3.74 (s, 3H), 3.41 (d,  $J = 10.0$  Hz, 1H), 3.27 (d,  $J = 16.7$  Hz, 1H), 2.69 (d,  $J = 16.7$  Hz, 1H), 2.47 (s, 3H), 2.40 - 2.26 (m, 2H), 0.96 (t,  $J = 7.6$  Hz, 3H).  $^{13}\text{C}$  NMR ( $\text{CDCl}_3$ , TMS, 150 MHz)  $\delta$  158.3, 150.7, 143.5, 142.4, 139.6, 133.6, 133.4, 131.2, 129.7, 127.7, 127.6, 127.2, 126.9, 126.4, 126.0, 125.7, 114.4, 71.1, 63.3, 59.1, 55.6, 55.3, 44.8, 23.6, 21.6, 11.6. IR (Acetone)  $\nu$  1166 1175, 1243, 1344, 1492, 1597, 2969  $\text{cm}^{-1}$ . HRMS (ESI) calcd. for  $\text{C}_{35}\text{H}_{36}\text{O}_3\text{NS}_2$  (M+H): 582.2131, Found: 582.2098.

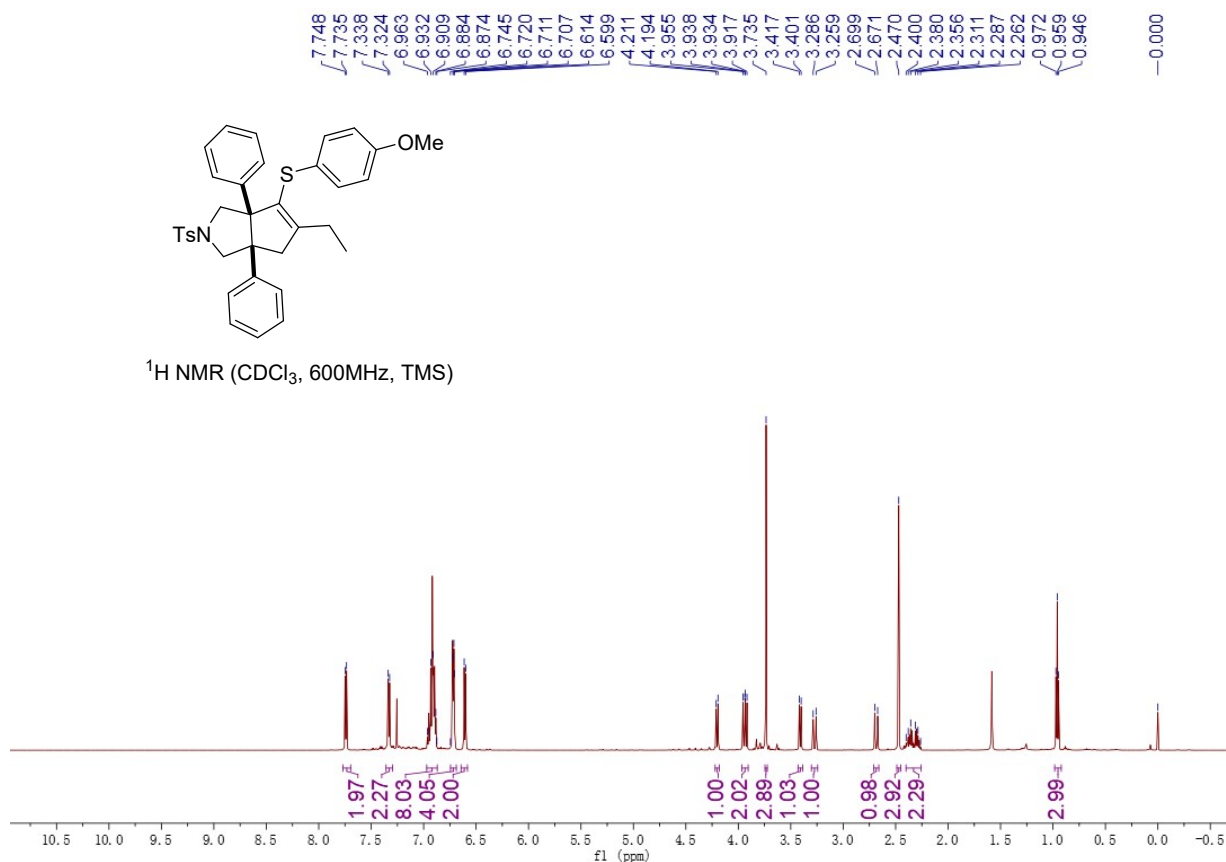

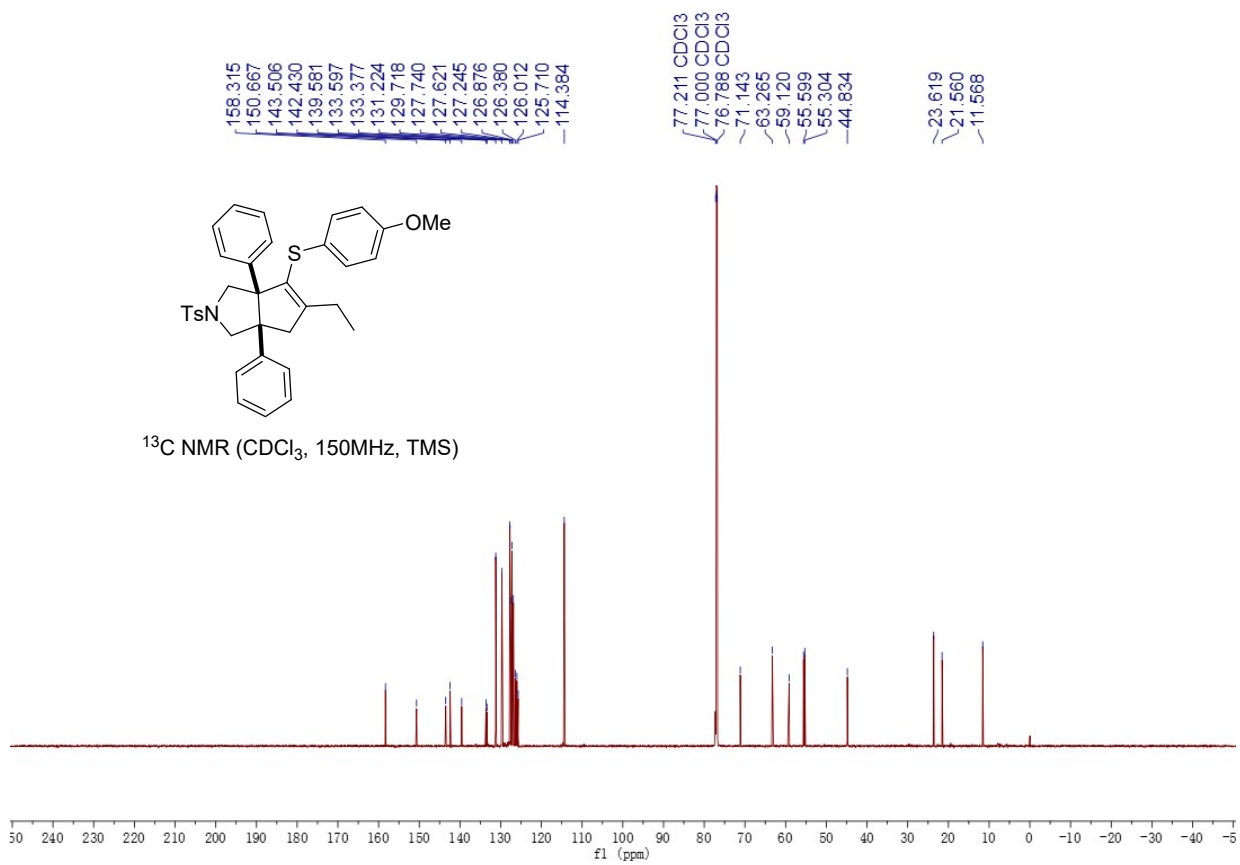

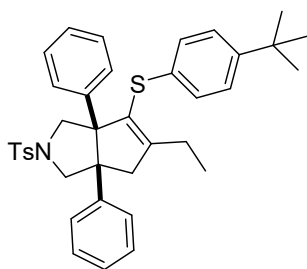

**6-((4-(*tert*-butyl)phenyl)thio)-5-ethyl-3a,6a-diphenyl-2-tosyl-1,2,3,3a,4,6a-hexahydrocyclopenta[*c*]pyrrole (3ae)**

A colorless oil, 37.1 mg, 61% yield.  $^1\text{H}$  NMR ( $\text{CDCl}_3$ , TMS, 600 MHz)  $\delta$  7.68 (d,  $J = 8.3$  Hz, 2H), 7.26 (d,  $J = 8.0$  Hz, 2H), 7.00 (d,  $J = 8.5$  Hz, 2H), 6.89 - 6.78 (m, 8H), 6.65 - 6.61 (m, 4H), 4.21 (d,  $J = 10.3$  Hz, 1H), 3.88 (d,  $J = 10.3$  Hz, 1H), 3.82 (d,  $J = 9.9$  Hz, 1H), 3.39 (d,  $J = 9.9$  Hz, 1H), 3.24 (d,  $J = 16.7$  Hz, 1H), 2.67 (d,  $J = 16.8$  Hz, 1H), 2.39 (s, 3H), 2.31 - 2.21 (m, 2H), 1.17 (s, 9H), 0.89 (t,  $J = 7.6$  Hz, 3H).  $^{13}\text{C}$  NMR ( $\text{CDCl}_3$ , TMS, 150 MHz)  $\delta$  157.6, 152.2, 143.5, 140.0, 134.6, 133.3, 131.4, 131.0, 130.5, 129.8, 128.9, 128.0, 127.7, 127.2, 126.5, 126.1, 113.1, 71.8, 63.3, 58.8, 56.5, 55.0, 45.3, 25.1, 21.6, 11.7. IR (Acetone)  $\nu$  1163, 1347, 14802, 1592, 2909  $\text{cm}^{-1}$ . HRMS (ESI) calcd. for  $\text{C}_{38}\text{H}_{42}\text{O}_2\text{NS}_2$  ( $\text{M}+\text{H}$ ): 607.2612, Found: 607.2617.

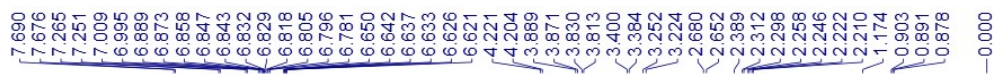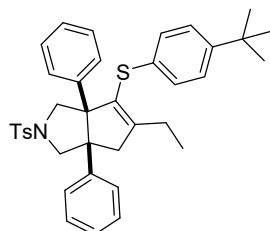

$^1\text{H}$  NMR ( $\text{CDCl}_3$ , 600MHz, TMS)

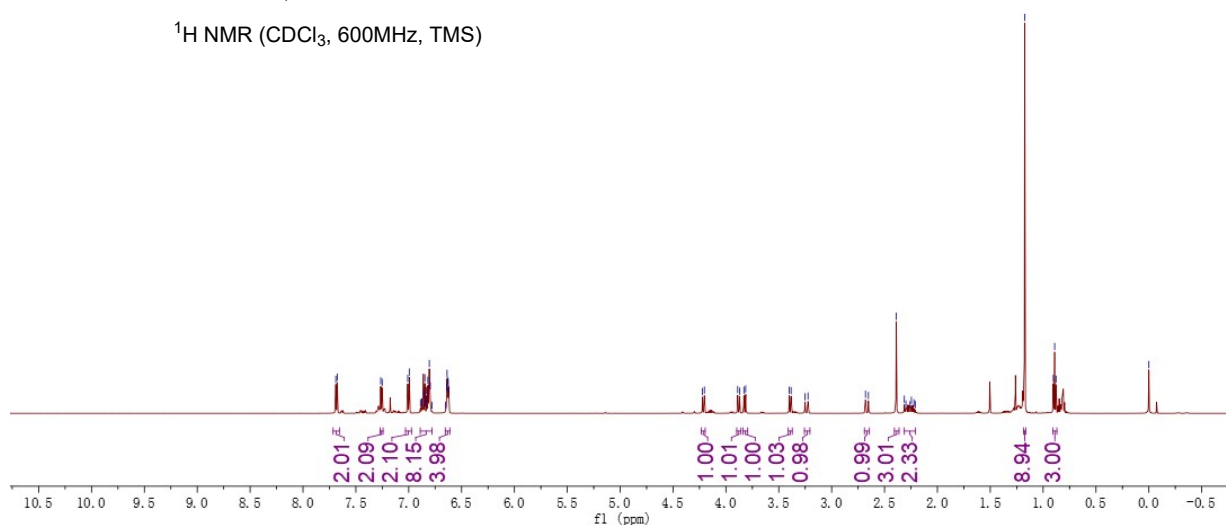

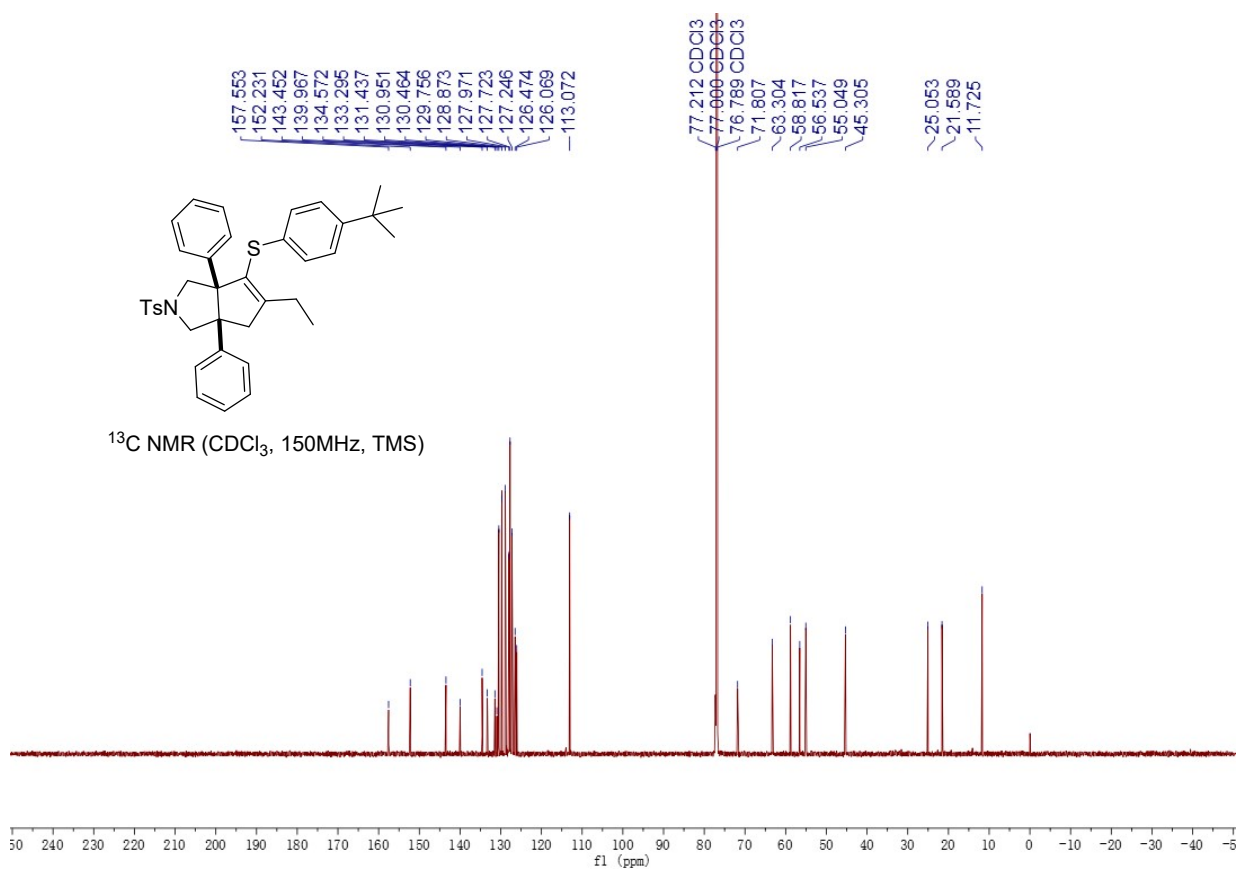

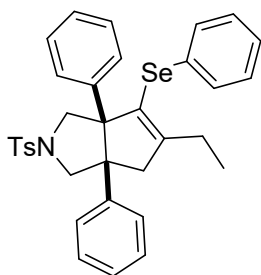

**5-ethyl-3a,6a-diphenyl-6-(phenylselanyl)-2-tosyl-1,2,3,3a,4,6a-hexahydrocyclopenta[c]pyrrole (4a)**

A colorless oil, 41.4 mg, 47% yield.  $^1\text{H}$  NMR ( $\text{CDCl}_3$ , TMS, 400 MHz)  $\delta$  7.73 (d,  $J = 8.1$  Hz, 2H), 7.32 (d,  $J = 8.0$  Hz, 2H), 7.11 - 7.02 (m, 5H), 6.98 - 6.88 (m, 6H), 6.78 - 6.71 (m, 4H), 4.17 (d,  $J = 10.3$  Hz, 1H), 3.98 (dd,  $J = 10.1, 6.9$  Hz, 2H), 3.44 (d,  $J = 9.9$  Hz, 1H), 3.33 (d,  $J = 16.7$  Hz, 1H), 2.77 (d,  $J = 16.7$  Hz, 1H), 2.47 (s, 3H), 2.43 - 2.25 (m, 2H), 0.97 (t,  $J = 7.6$  Hz, 3H).  $^{13}\text{C}$  NMR ( $\text{CDCl}_3$ , TMS, 100 MHz)  $\delta$  152.3, 143.5, 142.6, 139.9, 133.3, 131.4, 131.0, 130.5, 129.8, 128.9, 127.81, 127.76, 127.7, 127.2, 126.9, 126.5, 126.13, 126.07, 72.0, 63.3, 59.4, 56.6, 45.3, 25.1, 21.6, 11.8. IR (Acetone)  $\nu$  1163, 1347, 1480, 1592, 2909  $\text{cm}^{-1}$ . HRMS (ESI) calcd. for  $\text{C}_{34}\text{H}_{34}\text{O}_2\text{NSe}$  ( $\text{M}+\text{H}$ ): 600.1470, Found: 600.1432.

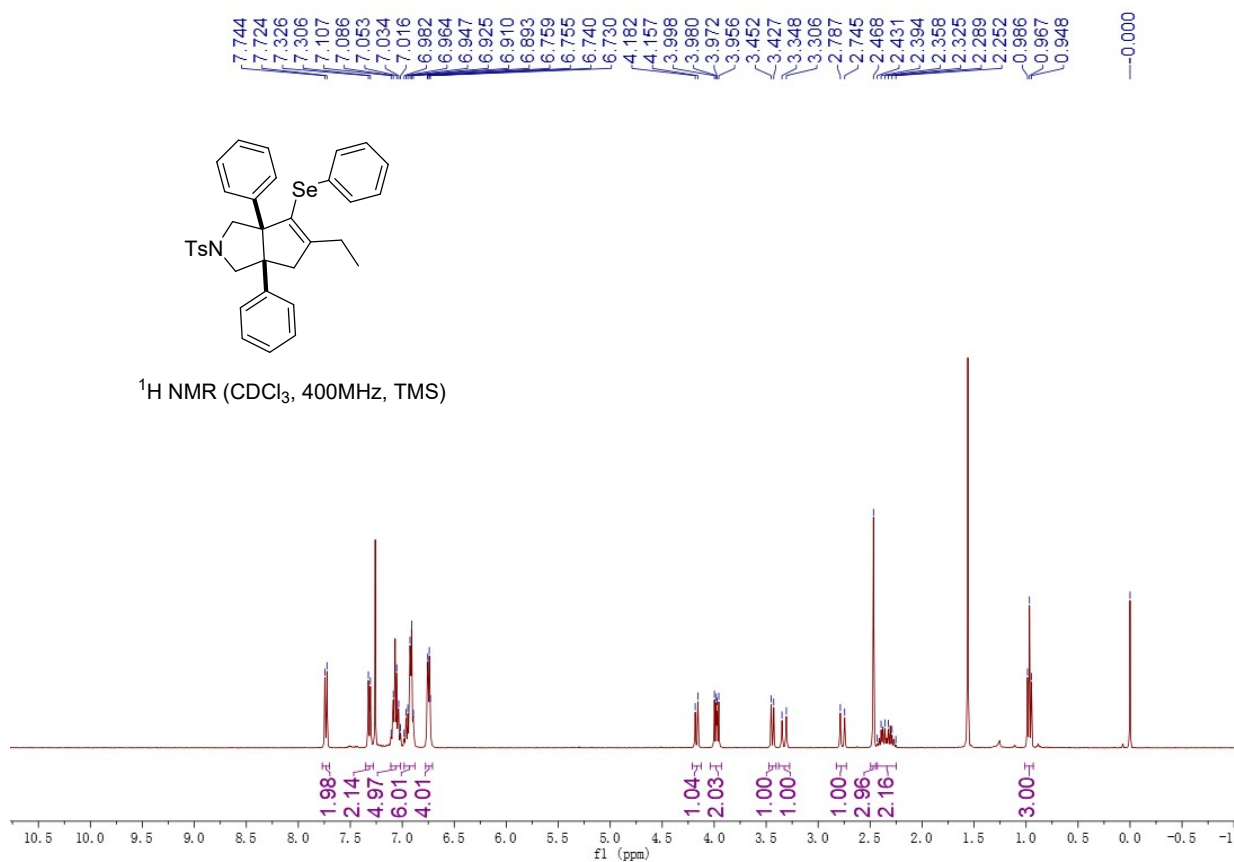



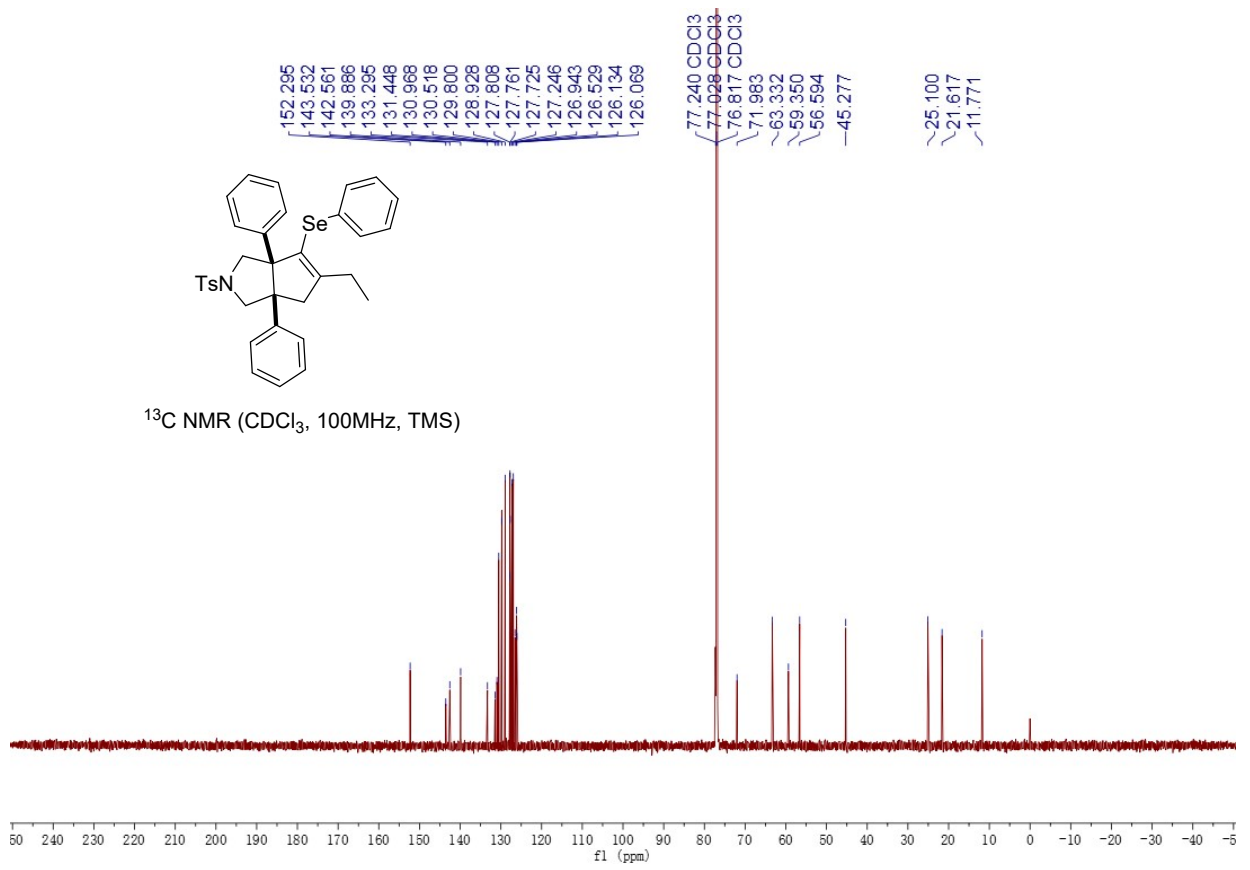

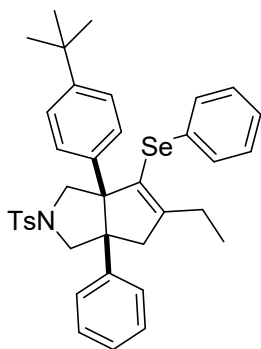

**6a-(4-(tert-butyl)phenyl)-5-ethyl-3a-phenyl-6-(phenylselanyl)-2-tosyl-1,2,3,3a,4,6a-hexahydrocyclopenta[c]pyrrole (4b)**

A colorless oil, 22.9 mg, 35% yield.  $^1\text{H}$  NMR ( $\text{CDCl}_3$ , TMS, 400 MHz)  $\delta$  7.73 (d,  $J = 8.1$  Hz, 2H), 7.31 (d,  $J = 8.0$  Hz, 2H), 7.07 - 6.88 (m, 10H), 6.74 (d,  $J = 7.6$  Hz, 2H), 6.64 (d,  $J = 8.5$  Hz, 2H), 4.18 (d,  $J = 10.3$  Hz, 1H), 3.97 (dd,  $J = 10.1, 2.1$  Hz, 2H), 3.42 (d,  $J = 9.9$  Hz, 1H), 3.29 (d,  $J = 16.6$  Hz, 1H), 2.75 (d,  $J = 16.6$  Hz, 1H), 2.47 (s, 3H), 2.41 - 2.22 (m, 2H), 1.13 (s, 9H), 0.95 (t,  $J = 7.6$  Hz, 3H).  $^{13}\text{C}$  NMR ( $\text{CDCl}_3$ , TMS, 100 MHz)  $\delta$  152.1, 149.3, 143.4, 142.6, 136.6, 133.4, 131.6, 131.1, 130.4, 129.7, 128.8, 127.7, 126.9, 126.8, 126.0, 125.9, 124.5, 71.5, 63.1, 59.2, 56.6, 45.1, 34.1, 31.1, 25.1, 21.6, 11.7. IR (Acetone)  $\nu$  1163, 1250, 1341, 1516, 2917  $\text{cm}^{-1}$ . HRMS (ESI) calcd. for  $\text{C}_{38}\text{H}_{42}\text{O}_2\text{NSSe}$  (M+H): 656.2096, Found: 656.2060.

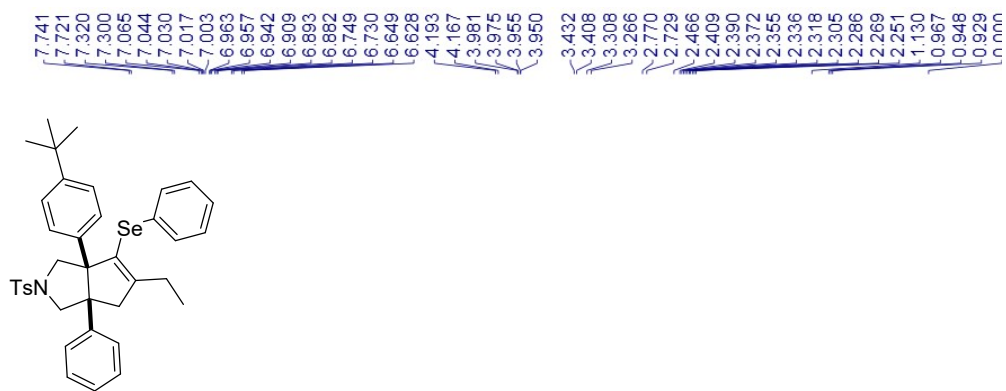

$^1\text{H}$  NMR ( $\text{CDCl}_3$ , 400MHz, TMS)

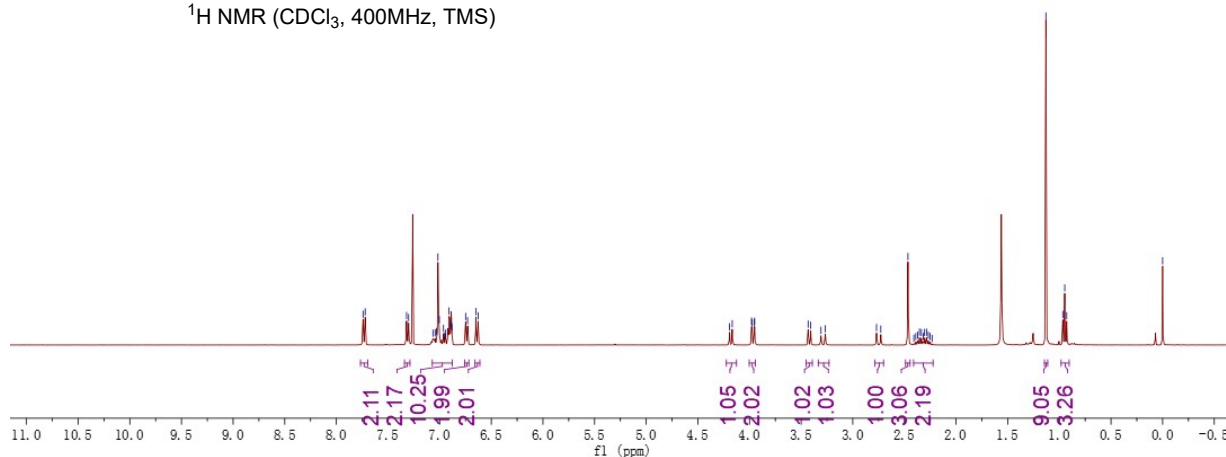

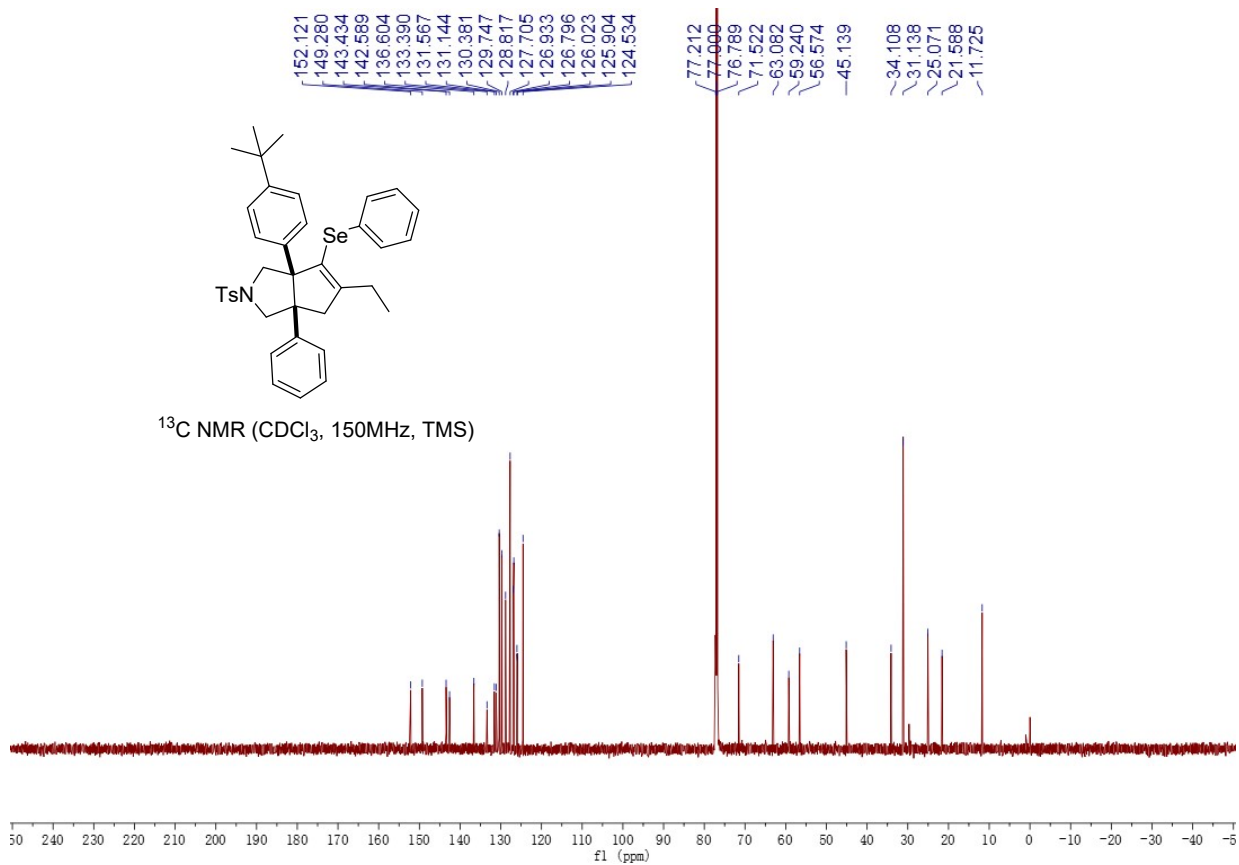

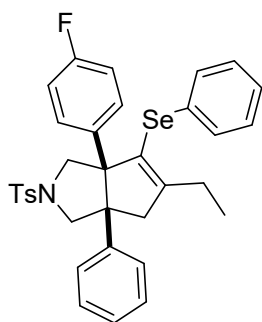

**5-ethyl-6a-(4-fluorophenyl)-3a-phenyl-6-(phenylselanyl)-2-tosyl-1,2,3,3a,4,6a-hexahydrocyclopenta[c]pyrrole (4c)**

A colorless oil, 35.8 mg, 58% yield.  $^1\text{H}$  NMR ( $\text{CDCl}_3$ , TMS, 400 MHz)  $\delta$  7.73 (d,  $J = 8.2$  Hz), 7.33 (d,  $J = 8.0$  Hz), 7.14 - 6.90 (m, 9H), 6.78 - 6.72 (m, 2H), 6.71 - 6.63 (m, 2H), 6.61 - 6.52 (m, 2H), 4.15 (d,  $J = 10.3$  Hz, 1H), 3.98 (d,  $J = 9.9$  Hz, 1H), 3.93 (d,  $J = 10.3$  Hz, 1H), 3.40 (d,  $J = 10.0$  Hz, 1H), 3.30 (d,  $J = 16.7$  Hz, 1H), 2.75 (d,  $J = 16.7$  Hz, 1H), 2.47 (s, 3H), 2.43 - 2.28 (m, 2H), 0.97 (t,  $J = 7.6$  Hz, 3H).  $^{13}\text{C}$  NMR ( $\text{CDCl}_3$ , TMS, 100 MHz)  $\delta$  162.5 (d,  $J = 244.3$  Hz), 160.1, 152.5, 143.6, 142.3, 135.7 (d,  $J = 3.2$  Hz), 133.2, 131.3, 130.8, 130.6, 129.8, 128.9 (d,  $J = 7.9$  Hz), 128.8, 127.9, 127.8, 126.9, 126.3 (d,  $J = 5.8$  Hz), 114.5 (d,  $J = 21.0$  Hz), 71.5, 63.2, 59.3, 56.7, 45.0, 25.1, 21.6, 11.8.  $^{19}\text{F}$  NMR ( $\text{CDCl}_3$ , TMS, 376 MHz)  $\delta$  -116.2 (s). IR (Acetone)  $\nu$  1046, 1160, 1346, 1506, 1597, 2873  $\text{cm}^{-1}$ . HRMS (ESI) calcd. for  $\text{C}_{34}\text{H}_{33}\text{NO}_2\text{FSSe}$  (M+H): 618.1376, Found: 618.1338.

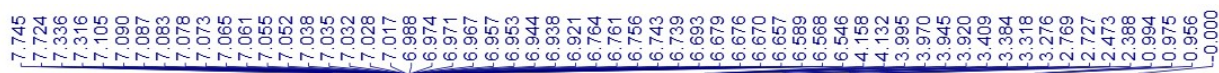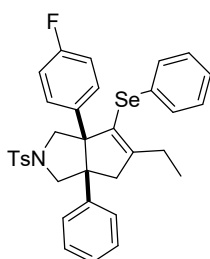

$^1\text{H}$  NMR ( $\text{CDCl}_3$ , 400MHz, TMS)

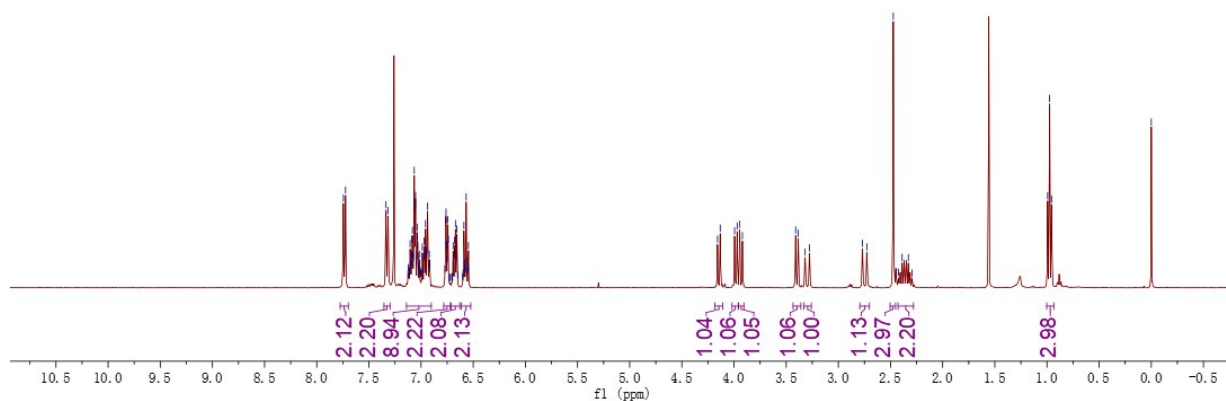

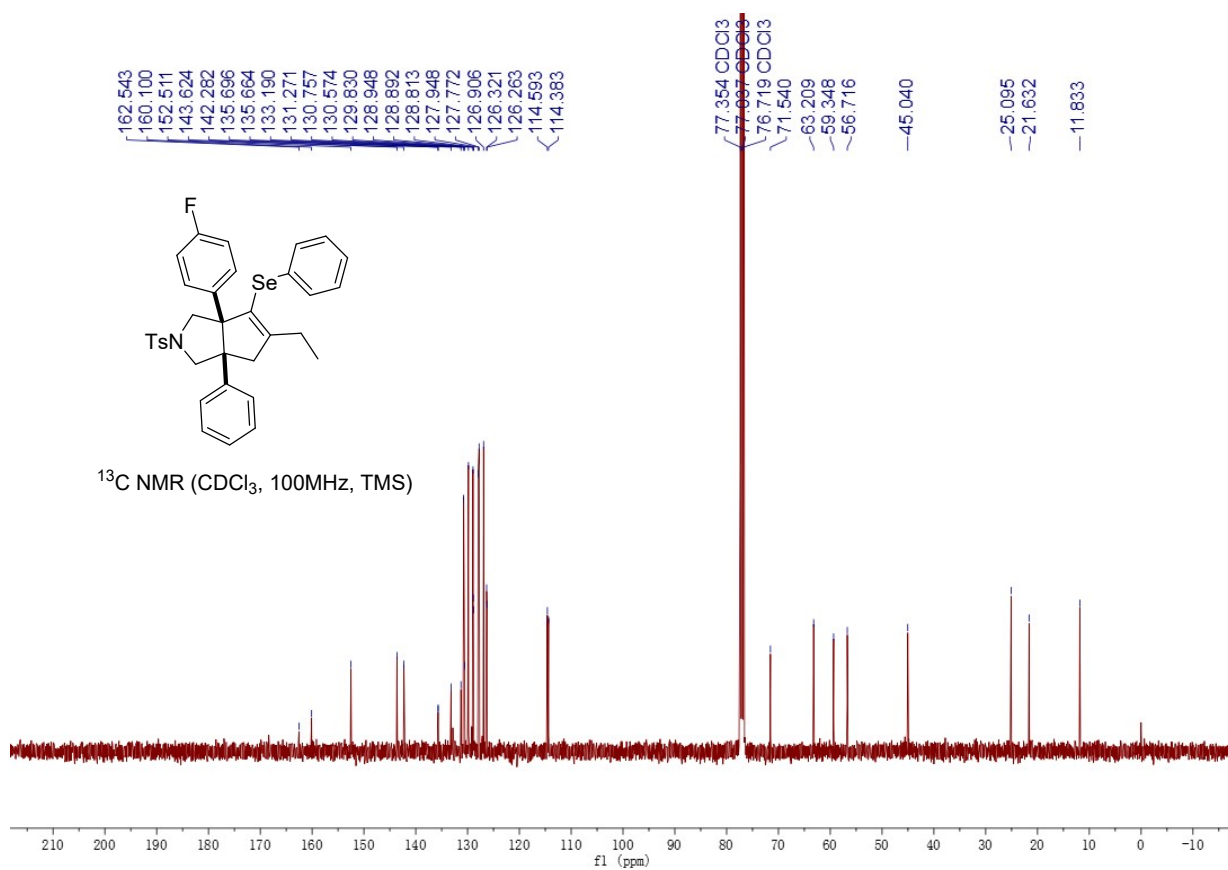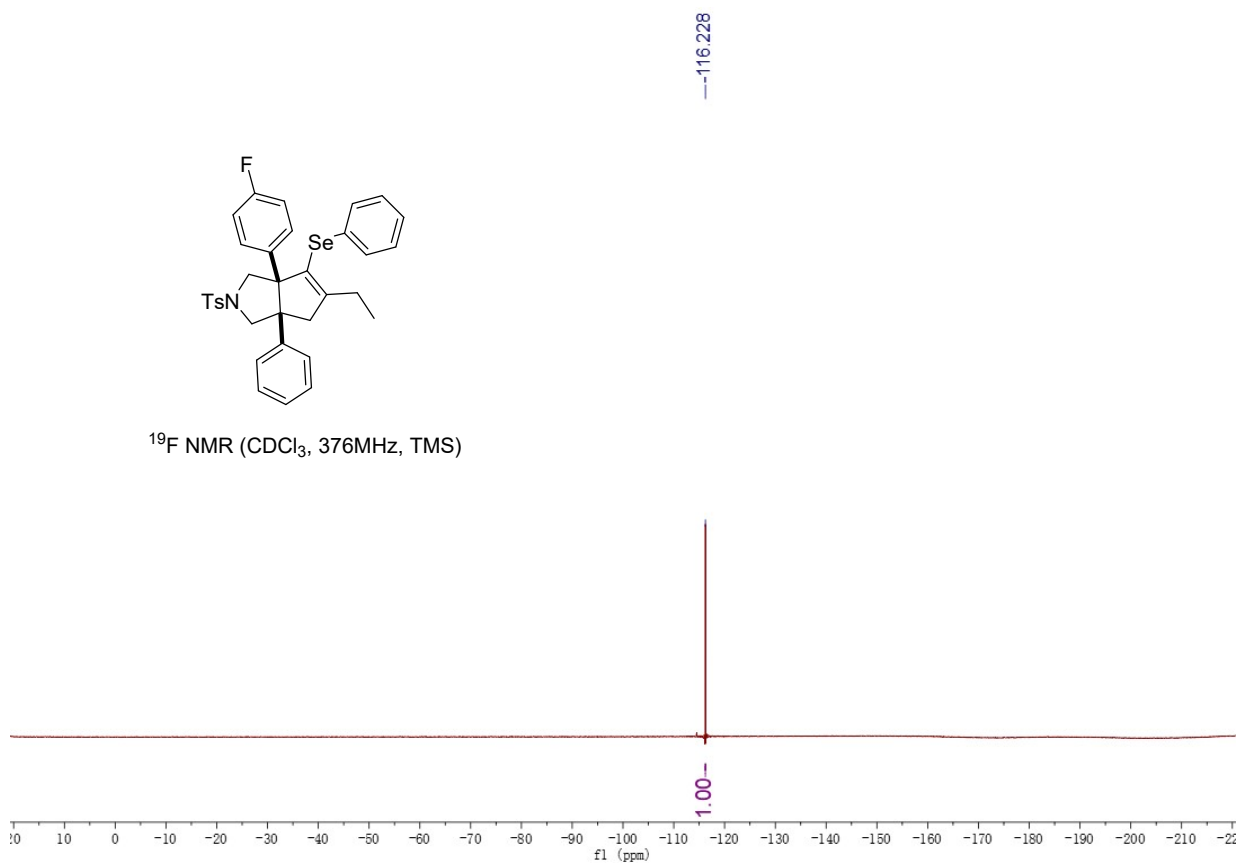

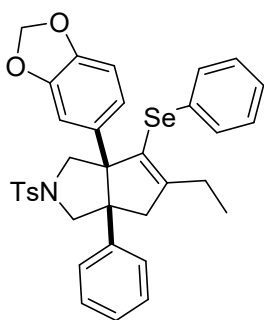

**6a-(benzo[d][1,3]dioxol-5-yl)-5-ethyl-3a-phenyl-6-(phenylselanyl)-2-tosyl-1,2,3,3a,4,6a-hexahydrocyclopenta[c]pyrrole (4d)**

A colorless oil, 32.1 mg, 50% yield.  $^1\text{H}$  NMR ( $\text{CDCl}_3$ , TMS, 600 MHz)  $\delta$  7.73 (d,  $J = 8.2$  Hz, 2H), 7.32 (d,  $J = 8.0$  Hz, 2H), 7.13 - 7.04 (m, 5H), 7.01 - 6.94 (m, 3H), 6.79 - 6.75 (m, 2H), 6.34 (d,  $J = 8.2$  Hz, 1H), 6.23 (d,  $J = 8.2$  Hz, 1H), 6.17 (s, 1H), 5.73 (s, 1H), 4.16 (d,  $J = 10.3$  Hz, 1H), 3.93 (d,  $J = 9.9$  Hz, 1H), 3.90 (d,  $J = 10.3$  Hz, 1H), 3.41 (d,  $J = 10.0$  Hz, 1H), 3.30 (d,  $J = 16.7$  Hz, 1H), 2.75 (d,  $J = 16.7$  Hz, 1H), 2.47 (s, 3H), 2.41 - 2.31 (m, 2H), 0.97 (t,  $J = 7.6$  Hz, 3H).  $^{13}\text{C}$  NMR ( $\text{CDCl}_3$ , TMS, 150 MHz)  $\delta$  152.3, 147.1, 145.9, 143.5, 142.5, 133.6, 133.2, 131.7, 130.9, 130.7, 129.8, 128.8, 127.9, 127.7, 126.8, 126.2, 126.1, 120.6, 107.9, 107.4, 101.0, 100.7, 71.7, 63.5, 59.1, 56.6, 45.1, 25.1, 21.6, 11.8. IR (Acetone)  $\nu$  1166, 1346, 1490, 1720, 2964  $\text{cm}^{-1}$ . HRMS (ESI) calcd. for  $\text{C}_{35}\text{H}_{34}\text{NO}_4\text{SSe}$  (M+H): 644.1368, Found: 644.1315.

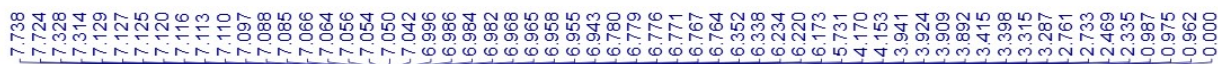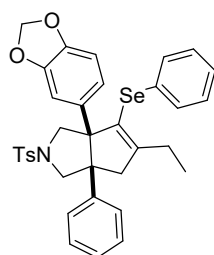

$^1\text{H}$  NMR ( $\text{CDCl}_3$ , 600MHz, TMS)

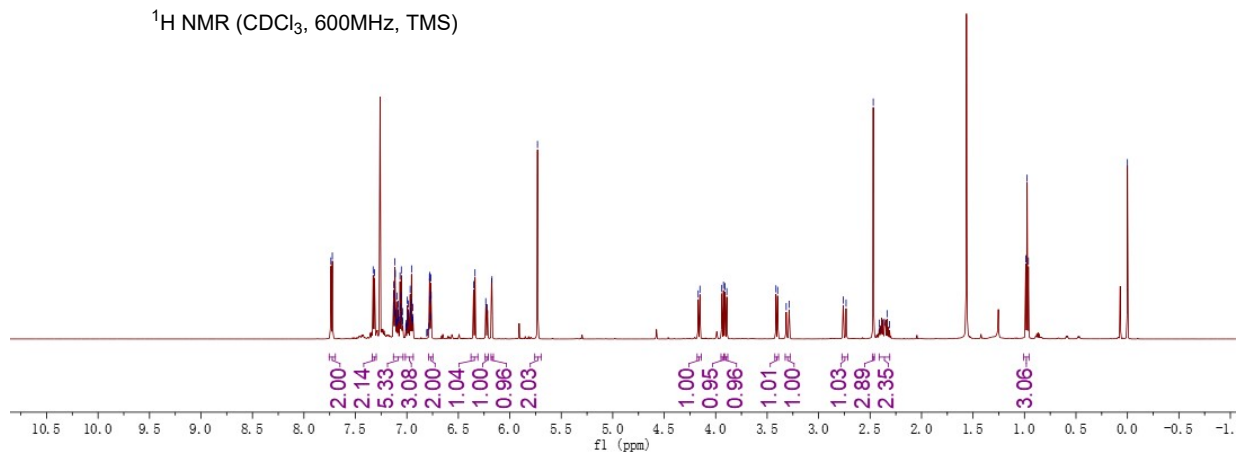

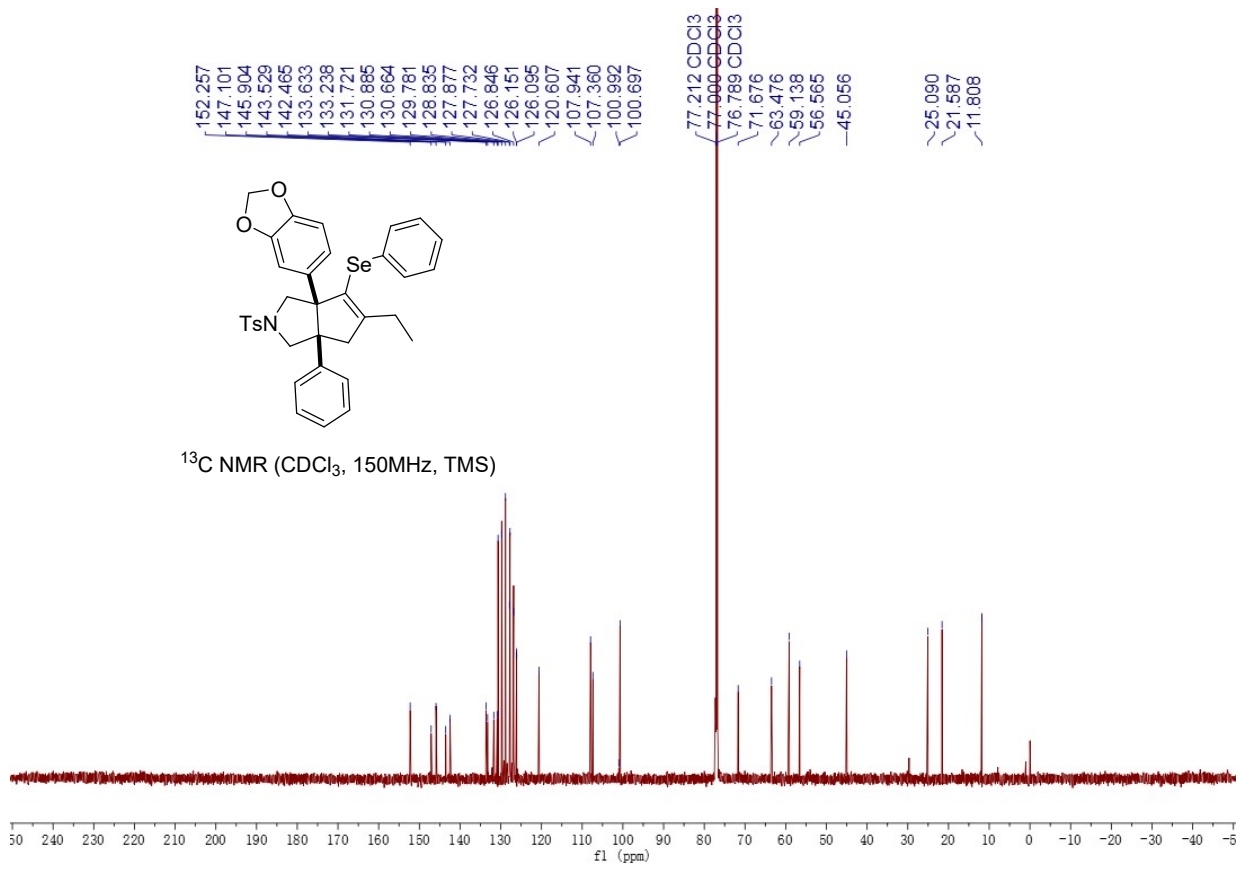

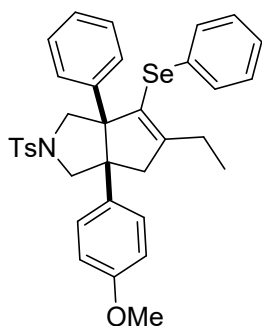

**5-ethyl-3a-(4-methoxyphenyl)-6a-phenyl-6-(phenylthio)-2-tosyl-1,2,3,3a,4,6a-hexahydrocyclopenta[c]pyrrole (4e)**

A colorless oil, 32.7 mg, 52% yield.  $^1\text{H}$  NMR ( $\text{CDCl}_3$ , TMS, 400 MHz)  $\delta$  7.73 (d,  $J = 7.9$  Hz, 2H), 7.32 (d,  $J = 7.9$  Hz, 2H), 7.11 - 7.00 (m, 5H), 6.96 - 6.90 (m, 3H), 6.78 - 6.71 (m, 2H), 6.67 (d,  $J = 8.4$  Hz, 2H), 6.45 (d,  $J = 8.4$  Hz, 2H), 4.14 (d,  $J = 10.3$  Hz, 1H), 4.01 - 3.89 (m, 2H), 3.67 (s, 3H), 3.41 (d,  $J = 9.8$  Hz, 1H), 3.26 (d,  $J = 16.7$  Hz, 1H), 2.73 (d,  $J = 16.7$  Hz, 1H), 2.47 (s, 3H), 2.40 - 2.23 (m, 2H), 0.96 (t,  $J = 7.6$  Hz, 3H).  $^{13}\text{C}$  NMR ( $\text{CDCl}_3$ , TMS, 150 MHz)  $\delta$  157.6, 152.2, 143.5, 140.0, 134.6, 133.3, 131.4, 131.0, 130.5, 129.8, 128.9, 128.0, 127.7, 127.2, 126.5, 126.1, 113.1, 71.8, 63.3, 58.8, 56.5, 55.0, 45.3, 25.1, 21.6, 11.7. IR (Acetone)  $\nu$  1160, 1332, 1487, 1723, 2964  $\text{cm}^{-1}$ . HRMS (ESI) calcd. for  $\text{C}_{35}\text{H}_{36}\text{NO}_3\text{SSe}$  (M+H): 630.1581, Found: 630.1538.

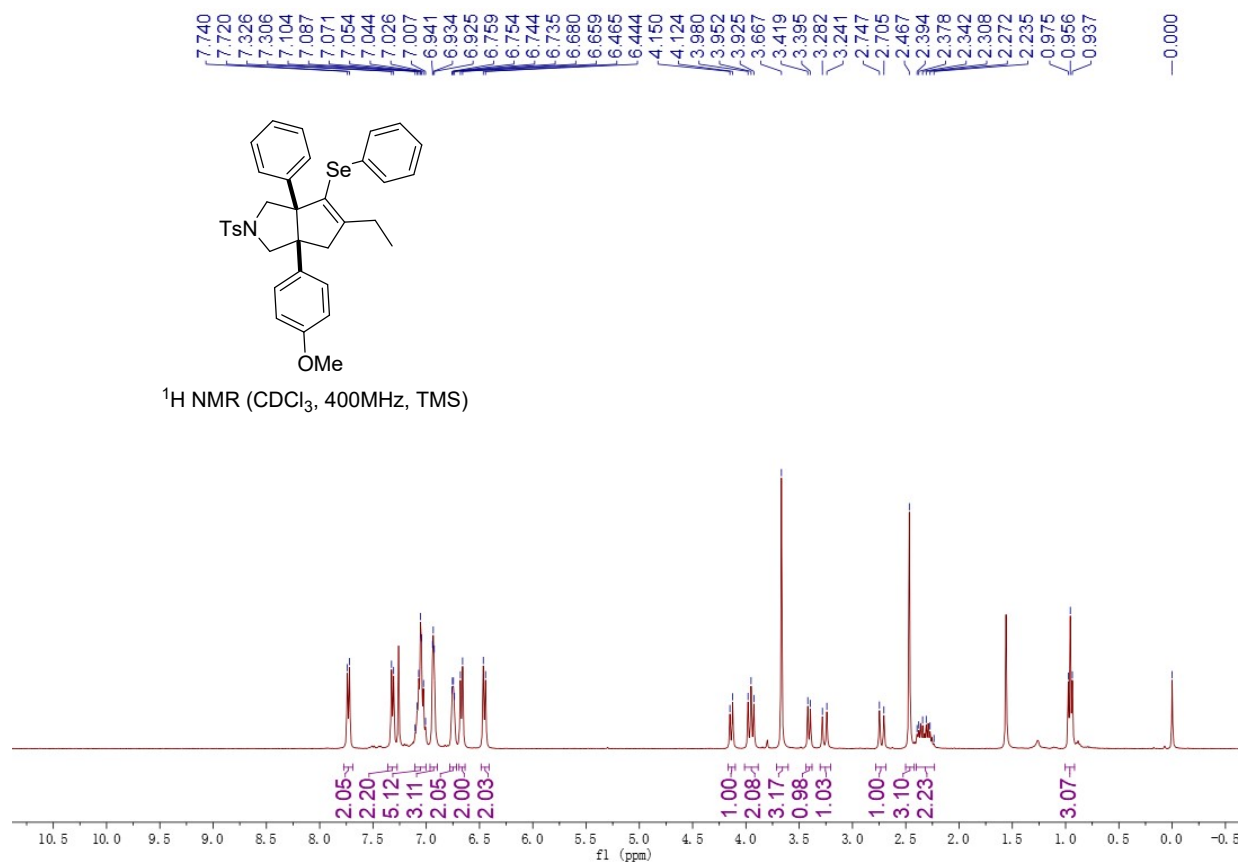



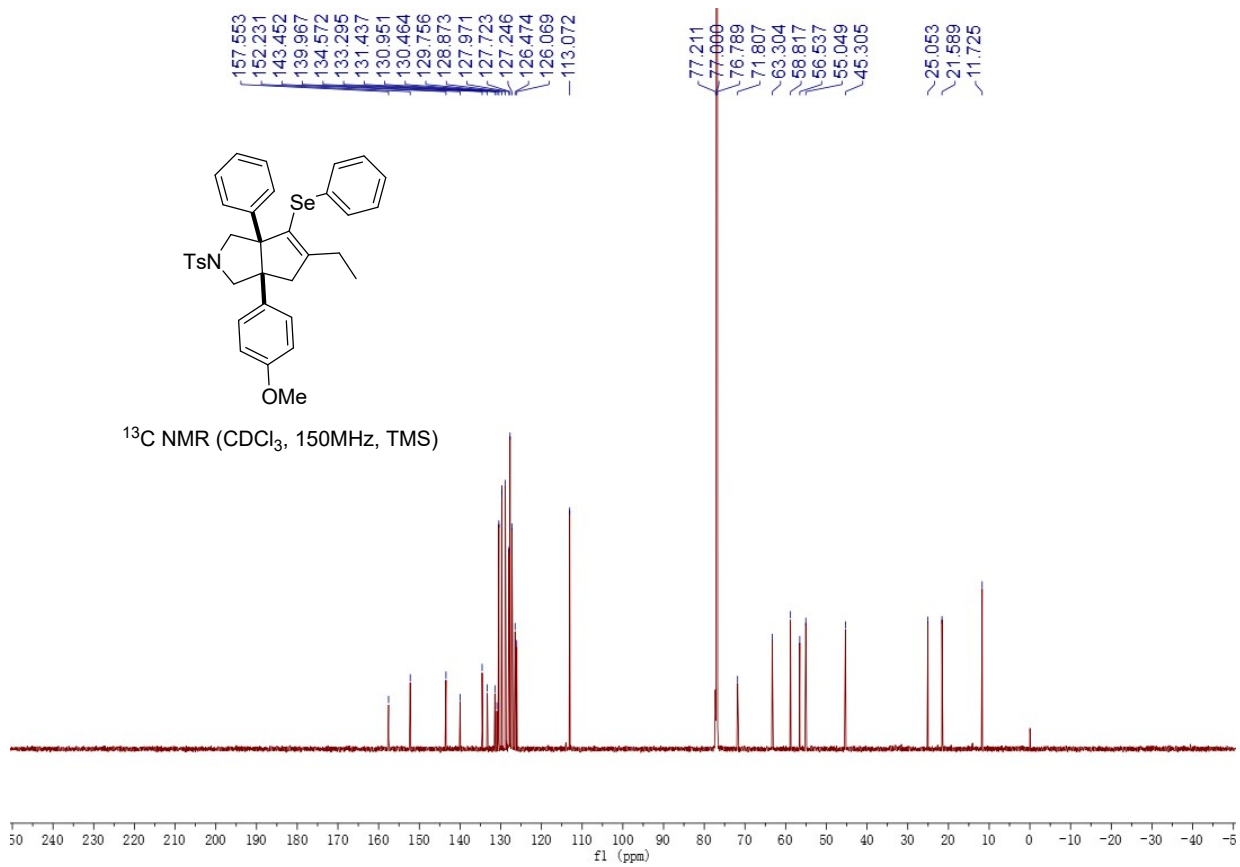

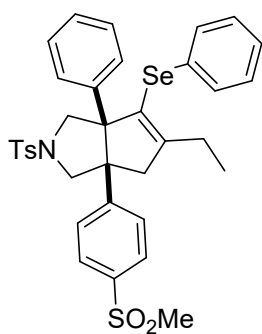

**5-ethyl-3a-(4-(methylsulfonyl)phenyl)-6a-phenyl-6-(phenylthio)-2-tosyl-1,2,3,3a,4,6a-hexahydrocyclopenta[c]pyrrole (4f)**

A colorless oil, 45.3 mg, 67% yield.  $^1\text{H}$  NMR ( $\text{CDCl}_3$ , TMS, 400 MHz)  $\delta$  7.64 (d,  $J = 8.0$  Hz, 2H), 7.44 (d,  $J = 8.3$  Hz, 2H), 7.26 (d,  $J = 8.0$  Hz, 2H), 7.06 - 6.91 (m, 7H), 6.90 - 6.82 (m, 3H), 6.69 - 6.61 (m, 2H), 4.03 - 3.94 (m, 2H), 3.91 (d,  $J = 10.1$  Hz, 1H), 3.28 (d,  $J = 10.0$  Hz, 1H), 3.22 (d,  $J = 16.8$  Hz, 1H), 2.86 (s, 3H), 2.74 (d,  $J = 16.8$  Hz, 1H), 2.42 (s, 3H), 2.33 - 2.18 (m, 2H), 0.89 (t,  $J = 7.6$  Hz, 3H).  $^{13}\text{C}$  NMR  $\text{CDCl}_3$ , TMS, 100 MHz)  $\delta$  151.4, 149.1, 143.9, 139.7, 138.0, 132.7, 131.3, 130.5, 130.4, 129.9, 128.9, 128.04, 128.00, 127.7, 127.1, 126.9, 126.8, 126.3, 72.3, 62.4, 59.5, 56.9, 45.3, 44.4, 24.9, 21.6, 11.7. IR (Acetone)  $\nu$  1093, 1151, 1306, 1346, 1597, 2928  $\text{cm}^{-1}$ . HRMS (ESI) calcd. for  $\text{C}_{35}\text{H}_{36}\text{NO}_4\text{S}_2\text{Se}$  (M+H): 678.1245, Found: 678.1200.

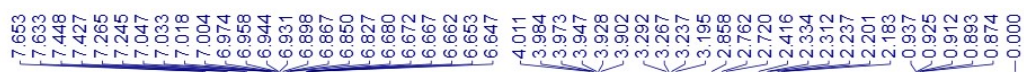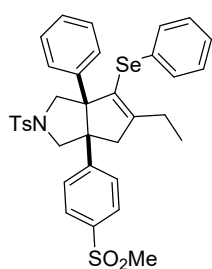

$^1\text{H}$  NMR ( $\text{CDCl}_3$ , 400MHz, TMS)

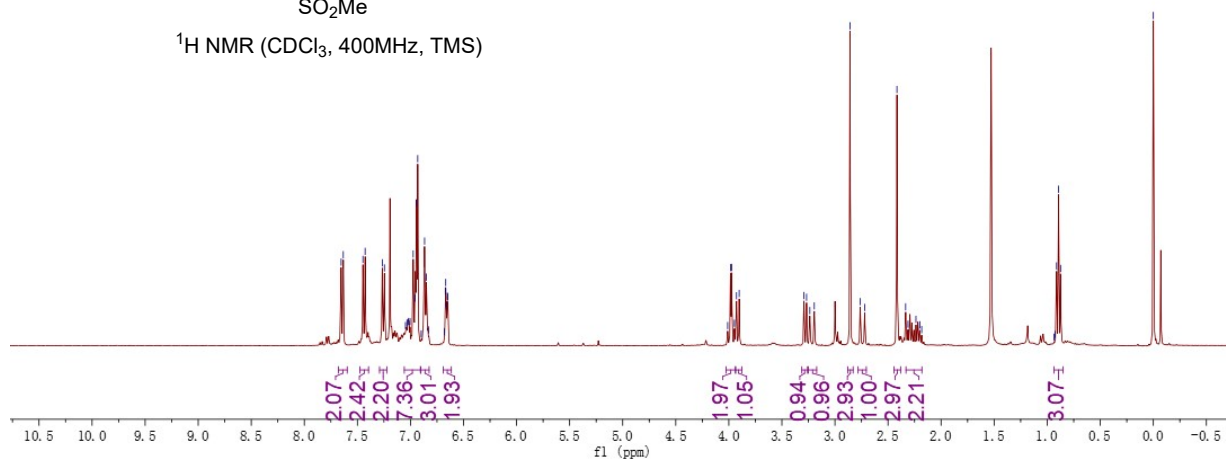

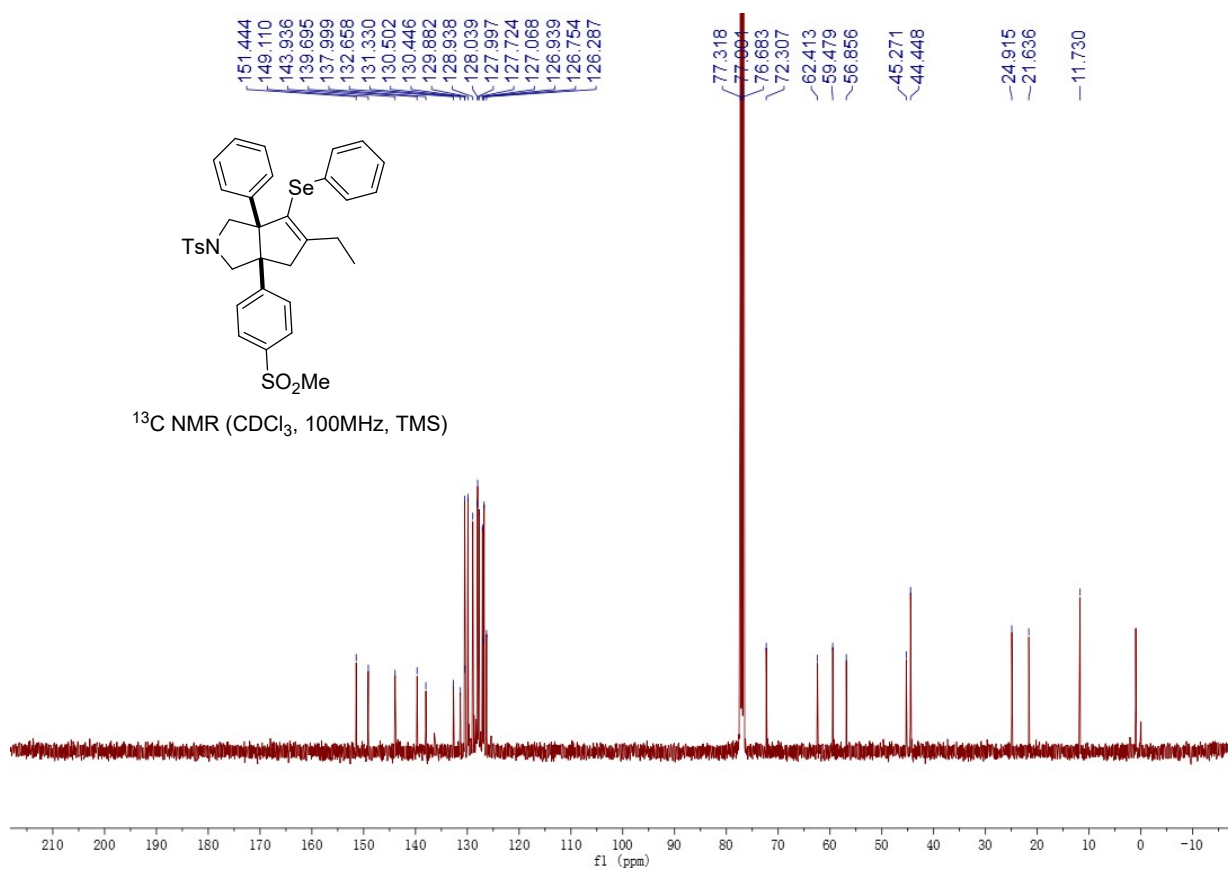

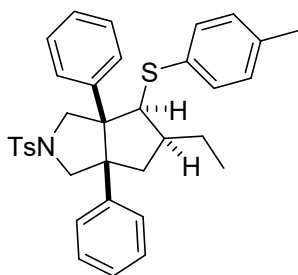

### 5-ethyl-3a,6a-diphenyl-4-(p-tolylthio)-2-tosyloctahydrocyclopenta[c]pyrrole (5)

A colorless oil, 48.2 mg, 85% yield.  $^1\text{H}$  NMR ( $\text{CDCl}_3$ , TMS, 400 MHz)  $\delta$  7.74 (d,  $J = 8.2$  Hz, 2H), 7.32 (d,  $J = 7.9$  Hz, 2H), 6.98 - 6.83 (m, 10H), 6.76 - 6.70 (m, 4H), 4.18 (d,  $J = 10.2$  Hz, 1H), 3.97 - 3.92 (m, 2H), 3.45 (d,  $J = 9.9$  Hz, 1H), 3.30 (d,  $J = 16.9$  Hz, 1H), 2.74 (d,  $J = 16.9$  Hz, 1H), 2.47 (s, 3H), 2.42 - 2.17 (m, 6H), 0.97 (t,  $J = 7.6$  Hz, 3H), 0.91 - 0.80 (m, 1H).  $^{13}\text{C}$  NMR ( $\text{CDCl}_3$ , TMS, 100 MHz)  $\delta$  151.8, 143.5, 142.5, 139.7, 135.3, 133.4, 132.5, 132.0, 129.7, 129.5, 128.1, 127.78, 127.74, 127.3, 126.9, 126.4, 126.0, 71.3, 63.3, 59.0, 55.9, 45.0, 23.7, 21.6, 20.9, 11.5. IR (Acetone)  $\nu$  759, 1023, 1120, 1433, 2921, 2930  $\text{cm}^{-1}$ . HRMS (ESI) calcd. for  $\text{C}_{35}\text{H}_{36}\text{NO}_2\text{S}_2$  (M-H): 566.2182, Found: 566.2142.

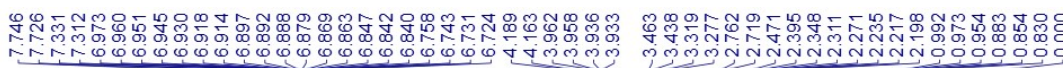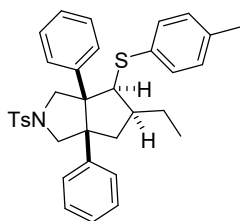

$^1\text{H}$  NMR ( $\text{CDCl}_3$ , 400MHz, TMS)

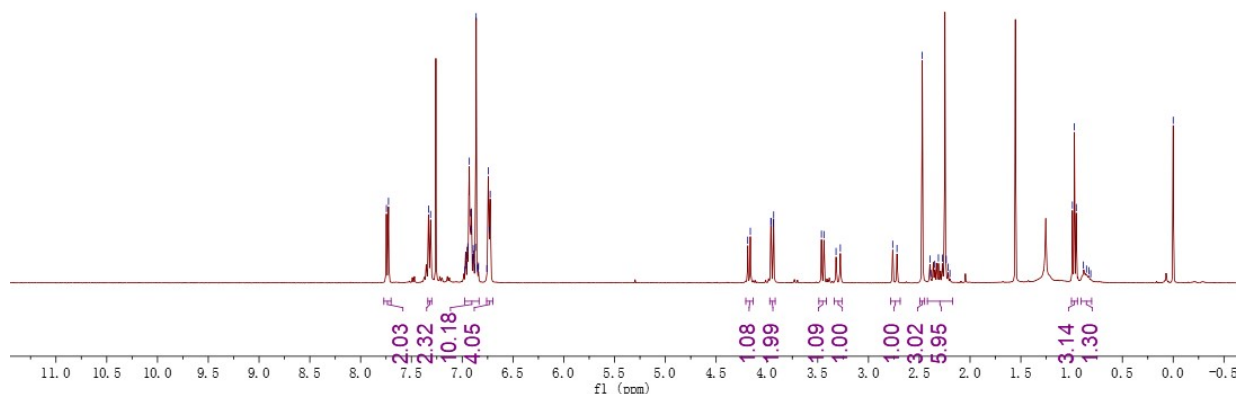

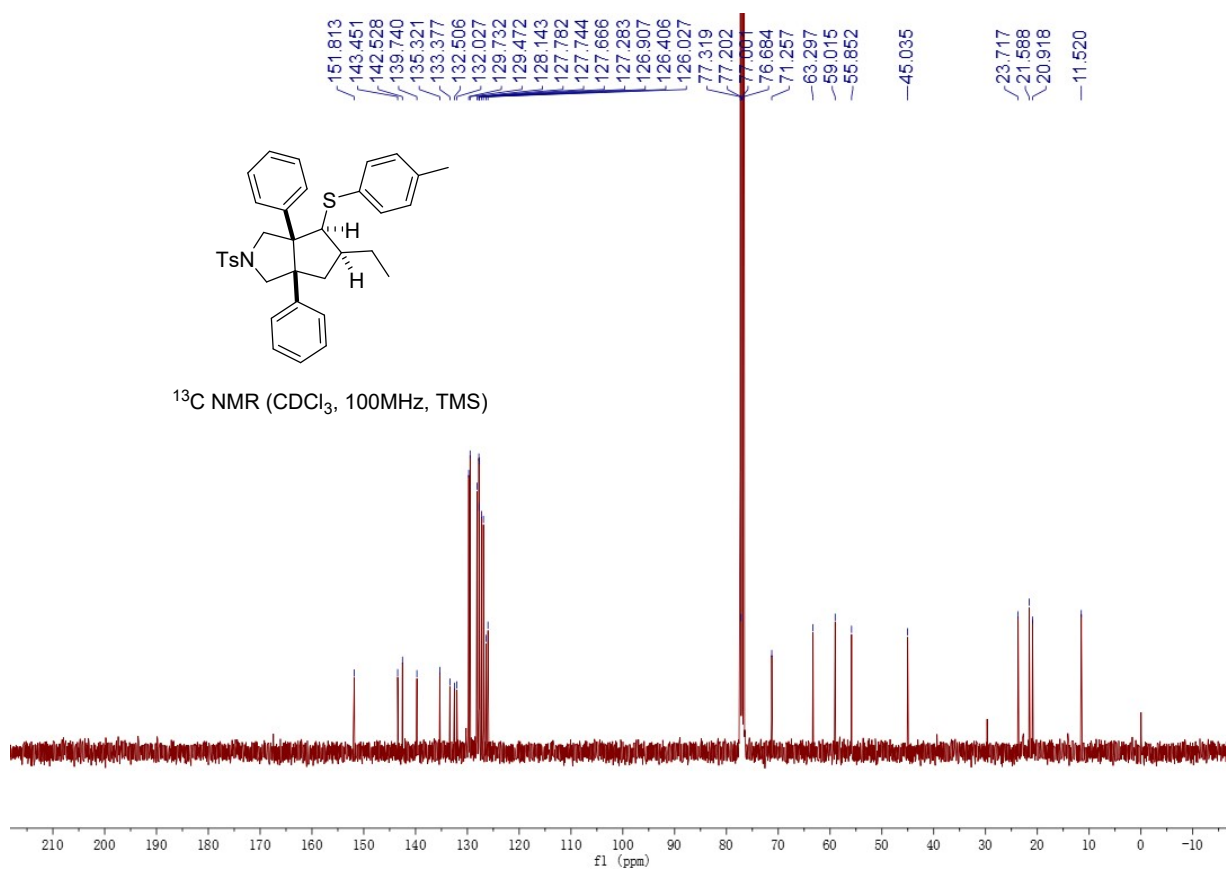

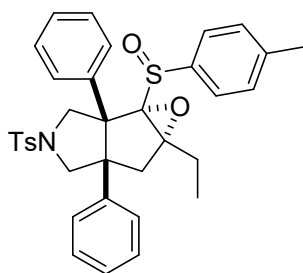

**5a-ethyl-1b,4a-diphenyl-1a-(*p*-tolylsulfinyl)-3-tosyloctahydrooxireno[2',3':3,4]cyclopenta[1,2-c]pyrrole (6)**

A colorless oil, 46.6 mg, 78% yield.  $^1\text{H}$  NMR ( $\text{CDCl}_3$ , TMS, 400 MHz)  $\delta$  7.86 (d,  $J = 8.3$  Hz, 2H), 7.53 (d,  $J = 8.3$  Hz, 2H), 7.44 (d,  $J = 8.0$  Hz, 2H), 7.18 (d,  $J = 8.1$  Hz, 2H), 7.00 - 6.76 (m, 8H), 6.54 (d,  $J = 7.9$  Hz, 2H), 4.74 (d,  $J = 10.9$  Hz, 1H), 4.14 (d,  $J = 10.9$  Hz, 1H), 3.93 (d,  $J = 10.2$  Hz, 1H), 3.35 - 3.25 (m, 2H), 2.70 - 2.56 (m, 3H), 2.52 (s, 3H), 2.38 (s, 3H), 0.97 (t,  $J = 7.5$  Hz, 3H).  $^{13}\text{C}$  NMR ( $\text{CDCl}_3$ , TMS, 100 MHz)  $\delta$  159.4, 143.9, 143.8, 140.55, 140.51, 139.5, 137.5, 133.0, 130.0, 129.4, 127.91, 127.86, 127.7, 127.5, 127.1, 126.9, 126.7, 126.4, 70.6, 62.3, 59.4, 54.6, 45.6, 23.5, 21.6, 21.5, 11.5. IR (Acetone)  $\nu$  1165, 1345, 1446, 1597, 2954  $\text{cm}^{-1}$ . HRMS (ESI) calcd. for  $\text{C}_{35}\text{H}_{36}\text{O}_4\text{NS}_2$  (M+H): 598.2086, Found: 598.2042.

7.872  
7.852  
7.541  
7.520  
7.452  
7.432  
7.186  
7.166  
6.994  
6.976  
6.963  
6.953  
6.934  
6.913  
6.848  
6.828  
6.809  
6.785  
6.764  
6.547  
6.527  
4.749  
4.722  
4.149  
4.122  
3.940  
3.915  
3.326  
3.305  
3.281  
2.675  
2.630  
2.602  
2.583  
2.523  
2.378  
0.992  
0.973  
0.954  
-0.000

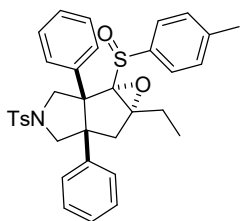

<sup>1</sup>H NMR (CDCl<sub>3</sub>, 400MHz, TMS)

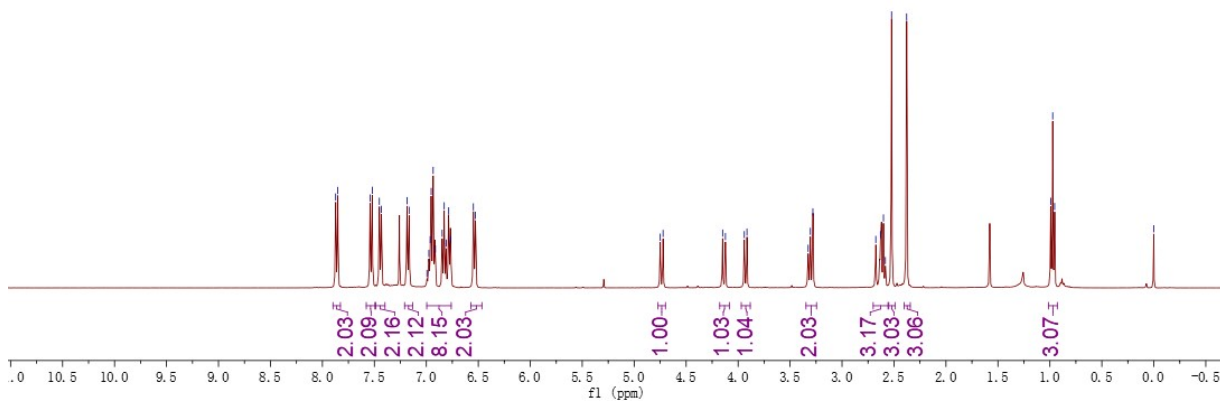

159.376  
143.886  
143.764  
140.549  
140.514  
139.453  
137.532  
133.033  
129.957  
129.436  
127.906  
127.855  
127.703  
127.459  
127.105  
126.887  
126.728  
126.447  
77.317  
77.000  
76.882  
70.585  
62.332  
59.370  
54.604  
45.589  
23.534  
21.626  
21.502  
11.451

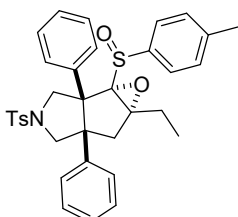

<sup>13</sup>C NMR (CDCl<sub>3</sub>, 100MHz, TMS)

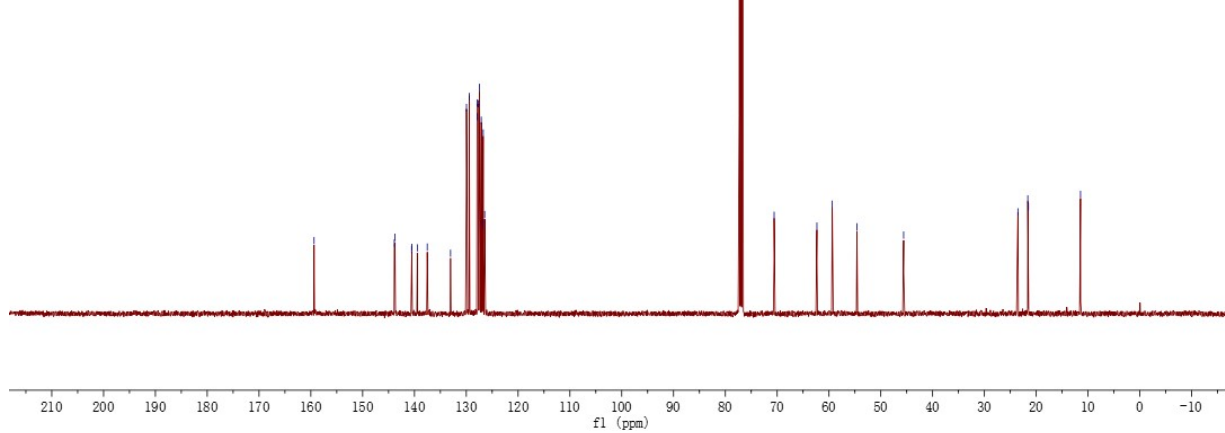

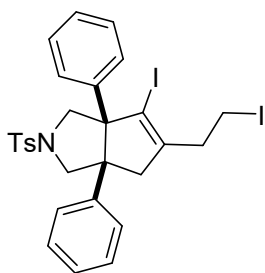

**6-iodo-5-(2-iodoethyl)-3a,6a-diphenyl-2-tosyl-1,2,3,3a,4,6a-hexahydrocyclopenta[c]pyrrole (7)**

A colorless oil, 27.8 mg, 20% yield.  $^1\text{H}$  NMR ( $\text{CDCl}_3$ , TMS, 400 MHz)  $\delta$  7.82 (d,  $J = 8.2$  Hz, 2H), 7.37 (d,  $J = 8.2$  Hz, 2H), 7.03 - 6.96 (m, 6H), 6.91 - 6.87 (m, 2H), 6.84 - 6.77 (m, 2H), 4.17 (d,  $J = 9.9$  Hz, 1H), 4.09 (d,  $J = 10.9$  Hz, 1H), 3.90 (d,  $J = 10.9$  Hz, 1H), 3.40 (d,  $J = 9.8$  Hz, 1H), 3.24 - 3.10 (m, 3H), 2.98 - 2.82 (m, 2H), 2.59 (d,  $J = 16.2$  Hz, 1H), 2.48 (s, 3H).  $^{13}\text{C}$  NMR ( $\text{CDCl}_3$ , TMS, 100 MHz)  $\delta$  145.6, 143.8, 141.1, 137.4, 133.0, 129.9, 128.1, 127.9, 127.8, 127.5, 126.9, 126.9, 126.5, 108.7, 72.7, 62.2, 59.5, 57.0, 44.0, 37.1, 21.6, 0.6. IR (Acetone)  $\nu$  1159, 1215, 1371, 1466, 1627, 3014  $\text{cm}^{-1}$ . HRMS (ESI) calcd. for  $\text{C}_{28}\text{H}_{28}\text{O}_2\text{NSI}_2$  (M+H): 695.9925, Found: 695.9955.



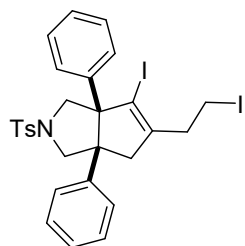

$^1\text{H NMR}$  ( $\text{CDCl}_3$  400MHz TMS)

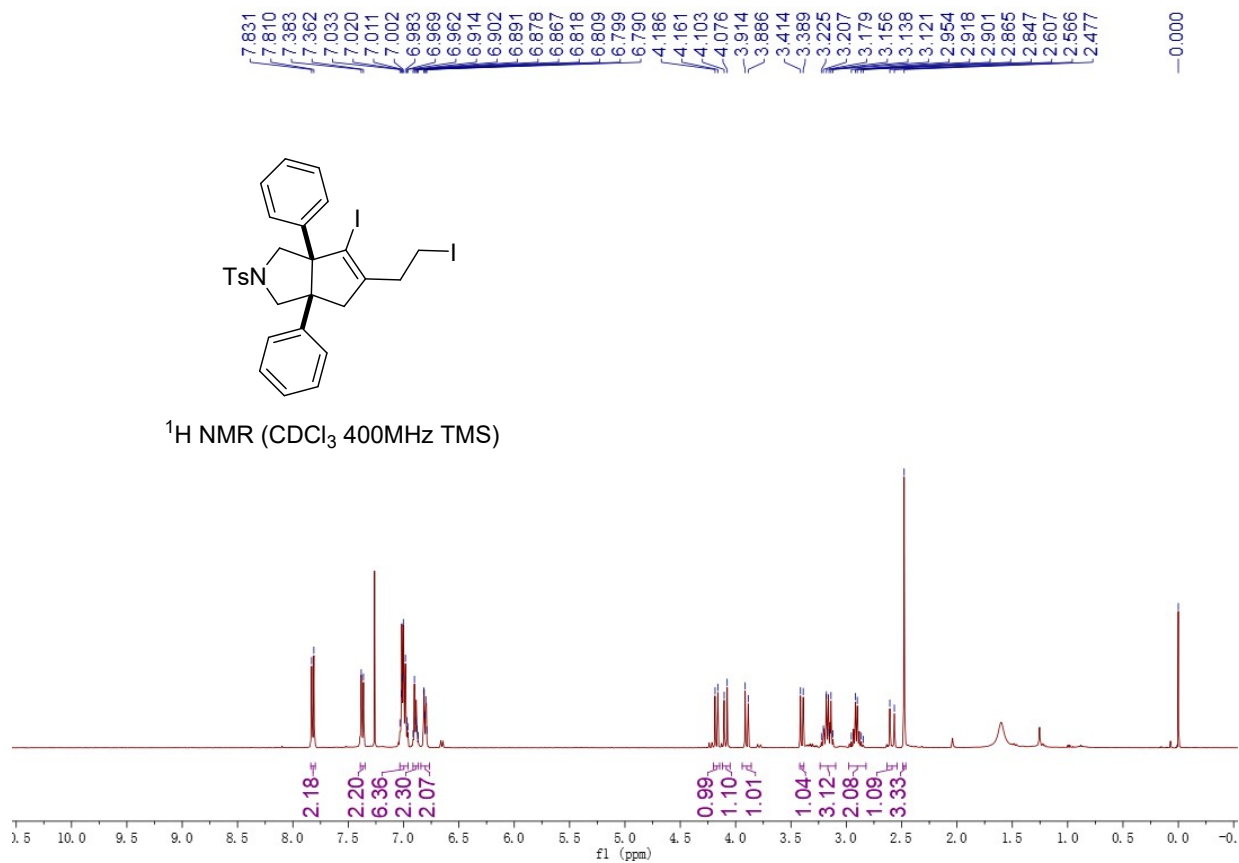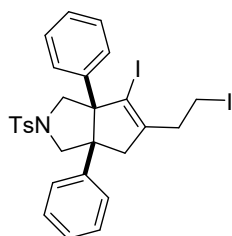

$^{13}\text{C NMR}$  ( $\text{CDCl}_3$  100MHz TMS)

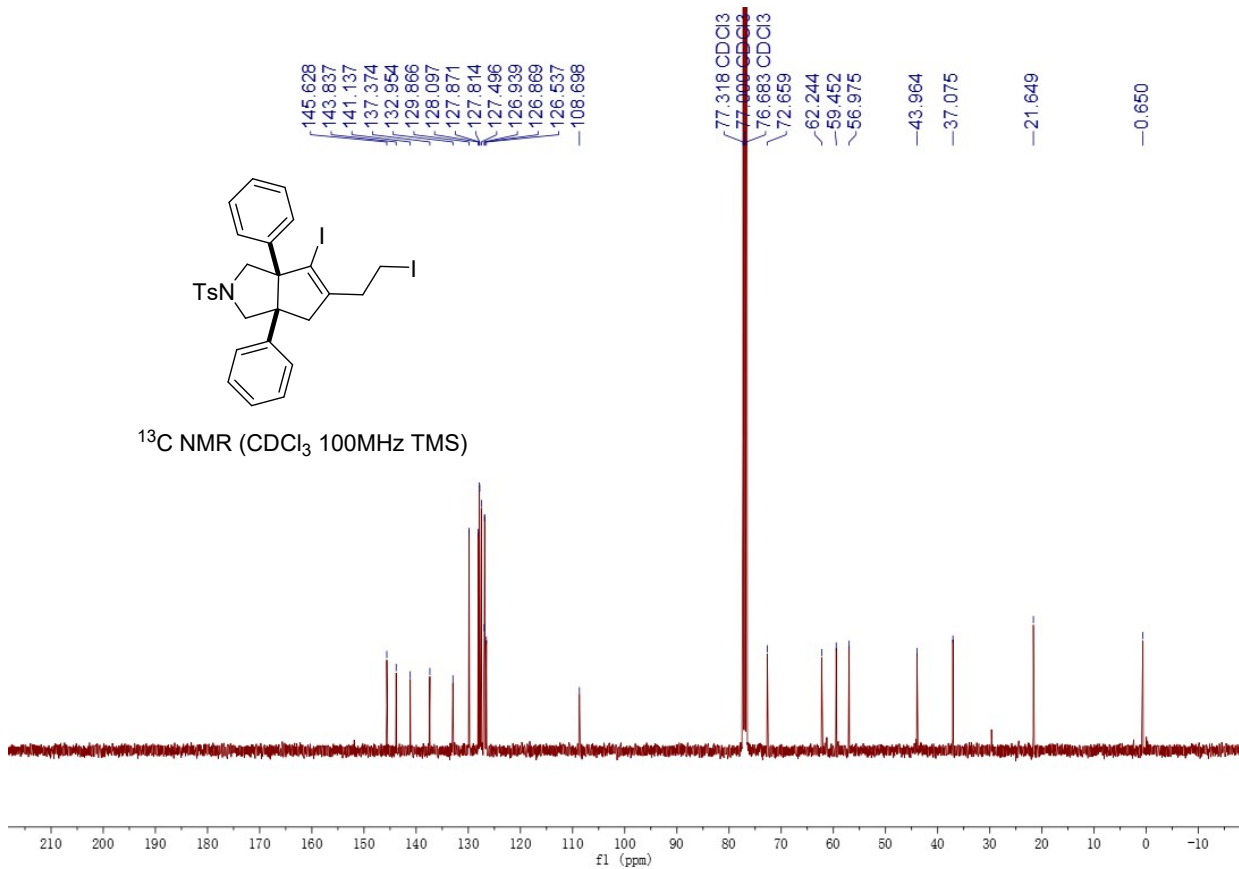

## 10. Computational studies

All quantum mechanical calculations have been performed with Gaussian 16. The geometries of all species have been optimized at B3LYP/6-31G(d)/Lanl2dz level. The subsequent frequency calculations on the stationary points were carried out at the same level of theory to ascertain the nature of the stationary points as minima on the respective potential energy surfaces. The conformational space of flexible systems has first been searched manually and checked by xtb 6.0 program. Thermochemical corrections to 298.15 K have been calculated for all minima from unscaled vibrational frequencies obtained at this same level. The thermochemical corrections have been combined with single-point energies calculated at the SMD(acetonitrile)/B3LYP/6-311+G(d,p)/Lanl2dz//B3LYP/6-31G(d)/Lanl2dz level to yield free energy  $G_{298}$  at 298.15 K. The solvent effect was estimated by the IEFPCM method with radii and nonelectrostatic terms for SMD salvation model in acetonitrile ( $\epsilon = 35.69$ ).

**Table S8.** The total energies, enthalpies and free energies of all species in acetonitrile shown in Schemes 4G.

|              | $E_{\text{tot}}$ | $H_{298}$    | $G_{298}$    |
|--------------|------------------|--------------|--------------|
| <b>INT1</b>  | -1698.628114     | -1698.114835 | -1698.217212 |
| <b>TS1</b>   | -1698.607399     | -1698.095176 | -1698.194483 |
| <b>INT2</b>  | -1698.654056     | -1698.138691 | -1698.236583 |
| <b>TS2</b>   | -1698.633381     | -1698.119466 | -1698.214798 |
| <b>INT3</b>  | -1698.663246     | -1698.147348 | -1698.244799 |
| <b>TS3</b>   | -1698.645026     | -1698.131453 | -1698.229087 |
| <b>INT4</b>  | -1698.66523      | -1698.151246 | -1698.250505 |
| <b>TS4</b>   | -2329.285471     | -2328.664736 | -2328.783492 |
| <b>INT5</b>  | -2329.333307     | -2328.70495  | -2328.828984 |
| <b>TS1'</b>  | -1698.584723     | -1698.07365  | -1698.172735 |
| <b>INT2'</b> | -1698.594569     | -1698.082314 | -1698.181342 |
| <b>PhSH</b>  | -630.512729      | -630.406911  | -630.443293  |

## Archive entries

### INT1

Opt @ B3LYP/6-31G(d)/Lanl2dz

SCF Done: E(B3LYP) = -1697.792629a.u.

Zero-point correction = 0.480591Hartree/Particle

Sum of electronic and thermal Free Energies = -1697.381727a.u.

-----

C 1.32214300,-1.31240200,-0.65759300  
C 1.78616700,0.69080800,-2.07472600  
C 2.09878900,1.91144600,-2.81279000  
C 1.02882900,0.93462300,-3.31957600  
C -0.53253100,0.66218600,0.93401100  
C -1.05873200,1.81809000,0.08570000  
C -1.97718900,1.64777000,-0.87701200  
C 2.03456300,-0.11942800,-1.05010200  
C -0.19943700,-1.24471700,-0.72705900  
I 3.67007700,0.60761300,0.29825100  
N -0.85371500,-0.69456000,0.48623400  
C -3.64999600,-1.17266900,0.44616700  
C -4.03807200,-1.89743100,-0.68347700  
C -5.24265900,-1.58537300,-1.31161200  
C -6.07374300,-0.56629800,-0.82396800  
C -5.66399300,0.13818700,0.31746600  
C -4.46083900,-0.15623700,0.95554400  
C -7.39447700,-0.25960100,-1.48929500  
S -2.08579400,-1.54794900,1.24951800  
O -2.17412400,-1.01931100,2.61399200  
O -1.83070400,-2.97046400,0.98692800  
C -0.50616700,3.16269400,0.41126600  
C -0.39180900,4.15683100,-0.57930300  
C 0.10889600,5.42166200,-0.27941800  
C 0.51858100,5.72601100,1.02119100  
C 0.42367700,4.75030400,2.01322900  
C -0.07808300,3.48349300,1.71181600  
C 1.99717100,-2.53985000,-0.29158900  
C 1.34677500,-3.55927800,0.44966700  
C 2.00479500,-4.74458000,0.76069200  
C 3.31991500,-4.96228500,0.33917800  
C 3.97531600,-3.97511700,-0.40545000  
C 3.33005900,-2.78499500,-0.71389700  
H 1.76951000,2.86241000,-2.39424300  
H 3.04530700,1.96424000,-3.35033100

H 1.25652800,0.32680900,-4.19478600  
H -0.01539800,1.23452900,-3.24166500  
H -0.90413600,0.75160800,1.95837000  
H 0.55798800,0.73772100,1.00567900  
H -2.38800400,2.48814400,-1.42792900  
H -2.37706100,0.66999600,-1.11819200  
H -0.60135800,-2.24594400,-0.87958700  
H -0.47652400,-0.62852800,-1.58861800  
H -3.41686900,-2.70816400,-1.04909000  
H -5.54729600,-2.15038700,-2.18924700  
H -6.29727600,0.92757500,0.71492700  
H -4.15514300,0.38311900,1.84516500  
H -7.37289900,-0.50400200,-2.55635600  
H -8.20687300,-0.84395300,-1.03713200  
H -7.65928100,0.79792000,-1.38639800  
H -0.68354700,3.92691900,-1.60003700  
H 0.18927600,6.16811900,-1.06541400  
H 0.91463800,6.71029300,1.25534800  
H 0.74112100,4.97187300,3.02859500  
H -0.14727200,2.74748900,2.50635100  
H 0.33195700,-3.41308200,0.80080700  
H 1.48622900,-5.50279300,1.34129400  
H 3.82771000,-5.89151100,0.58315900  
H 4.99223900,-4.13884500,-0.75215300  
H 3.84199600,-2.04078600,-1.31347500

## TS1

Opt @ B3LYP/6-31G(d)/Lanl2dz

SCF Done: E(B3LYP) = -1697.769348a.u.

Zero-point correction = 0.480608Hartree/Particle

Sum of electronic and thermal Free Energies = -1697.356432a.u.

Imaginary Frequency is -409.44 cm<sup>-1</sup>

---

C 0.92306300,-1.24202300,-0.50592000  
C 0.29213400,0.66478000,-1.96576000  
C -0.67357600,0.44723000,-3.08627200  
C 0.36741900,1.55738000,-3.13804900  
C -0.46230900,0.14297400,1.66835000  
C -0.32215400,1.45779400,0.91409200  
C -0.96141900,1.65003200,-0.28187600  
C 1.23486800,-0.21792100,-1.34958900  
C -0.55335600,-1.55294200,-0.29297300  
I 3.33486000,0.24977500,-1.79699900

N -1.10838200,-0.95891600,0.95368700  
C -3.84348700,-0.71912200,0.44675500  
C -4.23252200,-1.29087900,-0.76674600  
C -5.16909600,-0.63058500,-1.56273100  
C -5.73225600,0.58857300,-1.16170100  
C -5.33045600,1.13617400,0.06667000  
C -4.39334700,0.49363200,0.87201700  
C -6.77276700,1.28042200,-2.01029300  
S -2.60107300,-1.53490400,1.45875400  
O -2.79502700,-1.06998900,2.83615400  
O -2.64572600,-2.95723900,1.10662400  
C 0.59789400,2.45339000,1.48991400  
C 1.18787300,3.45998500,0.69501500  
C 2.04226900,4.40821800,1.24809300  
C 2.33955400,4.38229700,2.61396800  
C 1.77509900,3.39014200,3.41673100  
C 0.92191100,2.43643300,2.86363600  
C 1.87926200,-2.10900600,0.23543100  
C 2.80605500,-1.57284000,1.14547000  
C 3.66001900,-2.40498500,1.86849100  
C 3.61054200,-3.78893000,1.69246100  
C 2.69349600,-4.33594600,0.79311800  
C 1.83045700,-3.50498200,0.08014000  
H -0.52814800,-0.42583800,-3.72118300  
H -1.71805300,0.72748700,-2.95208200  
H 0.01064700,2.58208100,-3.03972000  
H 1.21440300,1.45094700,-3.81480200  
H -1.03216000,0.28314000,2.59219100  
H 0.53205500,-0.19466000,1.98537300  
H -0.97060700,2.62791300,-0.75150300  
H -1.76060600,0.97957500,-0.57001700  
H -0.67620600,-2.63425200,-0.20771500  
H -1.13454000,-1.21526900,-1.15553900  
H -3.82480700,-2.25011600,-1.06726100  
H -5.47536400,-1.07683900,-2.50578500  
H -5.76230900,2.07699900,0.39953400  
H -4.09935900,0.91395100,1.82779000  
H -6.70795300,0.96993700,-3.05799400  
H -7.78609900,1.04313200,-1.66023200  
H -6.66390200,2.36963600,-1.96971700  
H 0.99978800,3.47689200,-0.37356300  
H 2.48912600,5.16444300,0.60804700  
H 3.00829900,5.12263700,3.04422700  
H 1.99681200,3.35686000,4.48015400  
H 0.48726800,1.68593400,3.51612900

H 2.85323600,-0.49825500,1.29054400  
H 4.36402500,-1.96878100,2.57204800  
H 4.27768100,-4.43642800,2.25491700  
H 2.64602000,-5.41168000,0.64729000  
H 1.12402700,-3.94457000,-0.61894900

## INT2

Opt @ B3LYP/6-31G(d)/Lanl2dz

SCF Done: E(B3LYP) = -1697.812528a.u.

Zero-point correction = 0.484231Hartree/Particle

Sum of electronic and thermal Free Energies = -1697.395055a.u.

-----  
C 1.03598700,-1.22464300,-0.45179900  
C 0.19693900,0.80180500,-1.69154500  
C -0.40052200,0.48886600,-3.06657100  
C 0.43535100,1.71680400,-2.87359600  
C -0.47104300,0.07286500,1.63771200  
C -0.33362700,1.33061500,0.79881500  
C -0.82522500,1.30844500,-0.62110500  
C 1.27355600,-0.11153700,-1.17220000  
C -0.41346000,-1.66536100,-0.27187200  
I 3.33575800,0.46245300,-1.59565800  
N -1.01831600,-1.10978000,0.96371400  
C -3.74898100,-0.93386900,0.39649900  
C -4.09984600,-1.49890700,-0.83202000  
C -5.03231900,-0.84851400,-1.64053400  
C -5.62764500,0.35523100,-1.23911800  
C -5.26323700,0.89703200,0.00330100  
C -4.33201700,0.26329100,0.82259400  
C -6.66315200,1.03567000,-2.10289500  
S -2.50692600,-1.73174200,1.42259000  
O -2.74516800,-1.29453200,2.80148700  
O -2.49583500,-3.14762400,1.04442400  
C 0.29848700,2.47782000,1.37492600  
C 0.60395500,3.63868700,0.60606000  
C 1.21019000,4.74925000,1.17587200  
C 1.54317000,4.76265900,2.53591700  
C 1.26022300,3.63598400,3.31654200  
C 0.65595900,2.51864800,2.75581300  
C 2.05078500,-2.09505900,0.21107200  
C 2.88503600,-1.60400300,1.22711900  
C 3.79127100,-2.44475600,1.87308700

C 3.88476800,-3.78937800,1.51012500  
C 3.06032300,-4.29017500,0.50083400  
C 2.14509400,-3.45230100,-0.13544400  
H 0.03062300,-0.33621900,-3.62658100  
H -1.47866200,0.59189600,-3.17055600  
H -0.06453200,2.68210300,-2.84998000  
H 1.42192000,1.73850900,-3.32402500  
H -1.10985500,0.24593000,2.51077500  
H 0.50874300,-0.20522700,2.05099700  
H -1.16076500,2.30669400,-0.92030200  
H -1.71431400,0.67163200,-0.66322100  
H -0.44718100,-2.75263800,-0.18807200  
H -1.00252900,-1.37791300,-1.15051800  
H -3.66603900,-2.44616800,-1.13405900  
H -5.30949600,-1.29014500,-2.59471300  
H -5.72092300,1.82532200,0.33684900  
H -4.07049700,0.67691700,1.79077800  
H -6.56126400,0.74795400,-3.15416800  
H -7.67875700,0.76400600,-1.78595100  
H -6.58545000,2.12634100,-2.03833900  
H 0.38017300,3.65218600,-0.45511900  
H 1.43276900,5.61304500,0.55455900  
H 2.01735400,5.63408900,2.97820300  
H 1.51206500,3.63136000,4.37400100  
H 0.44342400,1.66843000,3.39513400  
H 2.82455300,-0.55760900,1.51009900  
H 4.42438700,-2.04669200,2.66146000  
H 4.59213200,-4.44347700,2.01258800  
H 3.12584400,-5.33502100,0.20977300  
H 1.50801500,-3.85274100,-0.91997700

## TS2

Opt @ B3LYP/6-31G(d)/Lanl2dz

SCF Done: E(B3LYP) = -1697.793043a.u.

Zero-point correction = 0.480608Hartree/Particle

Sum of electronic and thermal Free Energies = -1697.37446a.u.

Imaginary Frequency is -409.44 cm<sup>-1</sup>

---

C 0.92306300,-1.24202300,-0.50592000  
C 0.29213400,0.66478000,-1.96576000  
C -0.67357600,0.44723000,-3.08627200  
C 0.36741900,1.55738000,-3.13804900  
C -0.46230900,0.14297400,1.66835000

C -0.32215400,1.45779400,0.91409200  
C -0.96141900,1.65003200,-0.28187600  
C 1.23486800,-0.21792100,-1.34958900  
C -0.55335600,-1.55294200,-0.29297300  
I 3.33486000,0.24977500,-1.79699900  
N -1.10838200,-0.95891600,0.95368700  
C -3.84348700,-0.71912200,0.44675500  
C -4.23252200,-1.29087900,-0.76674600  
C -5.16909600,-0.63058500,-1.56273100  
C -5.73225600,0.58857300,-1.16170100  
C -5.33045600,1.13617400,0.06667000  
C -4.39334700,0.49363200,0.87201700  
C -6.77276700,1.28042200,-2.01029300  
S -2.60107300,-1.53490400,1.45875400  
O -2.79502700,-1.06998900,2.83615400  
O -2.64572600,-2.95723900,1.10662400  
C 0.59789400,2.45339000,1.48991400  
C 1.18787300,3.45998500,0.69501500  
C 2.04226900,4.40821800,1.24809300  
C 2.33955400,4.38229700,2.61396800  
C 1.77509900,3.39014200,3.41673100  
C 0.92191100,2.43643300,2.86363600  
C 1.87926200,-2.10900600,0.23543100  
C 2.80605500,-1.57284000,1.14547000  
C 3.66001900,-2.40498500,1.86849100  
C 3.61054200,-3.78893000,1.69246100  
C 2.69349600,-4.33594600,0.79311800  
C 1.83045700,-3.50498200,0.08014000  
H -0.52814800,-0.42583800,-3.72118300  
H -1.71805300,0.72748700,-2.95208200  
H 0.01064700,2.58208100,-3.03972000  
H 1.21440300,1.45094700,-3.81480200  
H -1.03216000,0.28314000,2.59219100  
H 0.53205500,-0.19466000,1.98537300  
H -0.97060700,2.62791300,-0.75150300  
H -1.76060600,0.97957500,-0.57001700  
H -0.67620600,-2.63425200,-0.20771500  
H -1.13454000,-1.21526900,-1.15553900  
H -3.82480700,-2.25011600,-1.06726100  
H -5.47536400,-1.07683900,-2.50578500  
H -5.76230900,2.07699900,0.39953400  
H -4.09935900,0.91395100,1.82779000  
H -6.70795300,0.96993700,-3.05799400  
H -7.78609900,1.04313200,-1.66023200  
H -6.66390200,2.36963600,-1.96971700



H 0.99978800,3.47689200,-0.37356300  
H 2.48912600,5.16444300,0.60804700  
H 3.00829900,5.12263700,3.04422700  
H 1.99681200,3.35686000,4.48015400  
H 0.48726800,1.68593400,3.51612900  
H 2.85323600,-0.49825500,1.29054400  
H 4.36402500,-1.96878100,2.57204800  
H 4.27768100,-4.43642800,2.25491700  
H 2.64602000,-5.41168000,0.64729000  
H 1.12402700,-3.94457000,-0.61894900

### INT3

Opt @ B3LYP/6-31G(d)/Lanl2dz

SCF Done: E(B3LYP) = -1697.826285a.u.

Zero-point correction = 0.485245Hartree/Particle

Sum of electronic and thermal Free Energies = -1697.407838a.u.

-----  
C -0.84588300,0.05837800,0.18337700  
C -0.83870600,1.39650700,-1.90273600  
C -0.12838000,2.51702900,-2.64935000  
C -1.59333700,2.31072200,-2.87468400  
C 0.03213700,-2.03500200,-0.73994000  
C -1.00115000,-0.94767000,-1.06685400  
C -0.52916600,-0.06494400,-2.26773800  
C -1.12918100,1.39604100,-0.45368500  
C 0.69266400,-0.05210800,0.50111100  
I -1.03352900,3.19329200,0.70068500  
N 1.17005000,-1.26450300,-0.20296900  
C 3.84246100,-1.12031300,0.17811600  
C 4.41629300,-0.38423600,1.21348800  
C 5.53330100,0.40856800,0.94418900  
C 6.08705400,0.46857500,-0.34042600  
C 5.49147200,-0.28993900,-1.36249600  
C 4.37723300,-1.08436000,-1.11342500  
C 7.31137800,1.30670000,-0.62248800  
S 2.41689800,-2.15355900,0.50633800  
O 2.51655100,-3.38603500,-0.28251700  
O 2.25042000,-2.21883300,1.96828100  
C -2.40825500,-1.49856400,-1.31017100  
C -3.44385000,-0.64333600,-1.72929600  
C -4.72483500,-1.12581500,-1.99157100  
C -5.00936900,-2.48537600,-1.85216900  
C -3.99439600,-3.35005500,-1.44926500

C -2.71251500,-2.86208800,-1.18178700  
C -1.72210400,-0.32630100,1.37571200  
C -3.01333100,0.20575100,1.51222500  
C -3.84388500,-0.17511600,2.56511800  
C -3.40485400,-1.10752200,3.50618200  
C -2.12754900,-1.65208700,3.38022000  
C -1.29371900,-1.26491100,2.32858100  
H 0.18812700,3.38728700,-2.08180800  
H 0.56302400,2.20810900,-3.43035500  
H -1.92353300,1.86662400,-3.81055500  
H -2.28174900,3.03349400,-2.44479100  
H 0.34441700,-2.60626600,-1.61729200  
H -0.36277500,-2.73305200,0.00630000  
H -1.01543000,-0.37217000,-3.19844200  
H 0.55201000,-0.18514400,-2.39675800  
H 0.86734700,-0.10674500,1.57785000  
H 1.23242200,0.81784700,0.11618700  
H 3.99688700,-0.44225300,2.21206600  
H 5.98257100,0.98577700,1.74835500  
H 5.91138700,-0.25889000,-2.36509300  
H 3.92931400,-1.67870900,-1.90305000  
H 7.49392600,2.03205900,0.17628200  
H 8.20700200,0.67765800,-0.70887900  
H 7.21158600,1.85630000,-1.56525200  
H -3.25089200,0.41676300,-1.85019500  
H -5.50179100,-0.43471200,-2.30848400  
H -6.00675700,-2.86392500,-2.05873700  
H -4.19201800,-4.41327000,-1.34120900  
H -1.95219200,-3.57300900,-0.87915400  
H -3.37098500,0.92851500,0.78744600  
H -4.83648100,0.25984400,2.64807200  
H -4.05068100,-1.40471700,4.32816200  
H -1.76806100,-2.37950600,4.10315500  
H -0.30331000,-1.70614600,2.27171800

### TS3

Opt @ B3LYP/6-31G(d)/Lanl2dz

SCF Done: E(B3LYP) = -1697.808273a.u.

Zero-point correction = 0.482870Hartree/Particle

Sum of electronic and thermal Free Energies = -1697.392334a.u.

Imaginary Frequency is -630.03 cm<sup>-1</sup>

-----  
C -0.86141200,0.04746500,0.17605700

C -0.61046500,1.32635100,-1.87498000  
C 0.95321700,2.26787900,-2.48478300  
C -0.47121500,2.43955200,-2.85820600  
C -0.09422900,-2.09645900,-0.74090300  
C -1.08031900,-0.96765500,-1.06767900  
C -0.59519800,-0.13860500,-2.30424100  
C -0.94453500,1.38954900,-0.52378000  
C 0.63016400,-0.22278800,0.59661700  
I -0.90016600,3.22563800,0.57375900  
N 1.08453500,-1.36271800,-0.23884000  
C 3.74295800,-1.27224800,0.23627900  
C 4.28498900,-0.65382800,1.36170200  
C 5.40935500,0.16007300,1.21290100  
C 6.00092000,0.35680900,-0.04085400  
C 5.43653500,-0.28534200,-1.15617000  
C 4.31594300,-1.09925300,-1.02740800  
C 7.23233200,1.21758900,-0.19478300  
S 2.31234900,-2.33465900,0.40973400  
O 2.43857500,-3.47393500,-0.50543900  
O 2.09786300,-2.56215600,1.84923200  
C -2.52044800,-1.44298300,-1.27626300  
C -3.48213100,-0.55789700,-1.79722400  
C -4.79694400,-0.96022800,-2.02225000  
C -5.19017400,-2.27004600,-1.74091800  
C -4.25080800,-3.16359300,-1.23158800  
C -2.93474600,-2.75396400,-1.00051300  
C -1.85016700,-0.20219300,1.31534100  
C -3.07656000,0.47834700,1.36107500  
C -4.01282300,0.21786300,2.36070700  
C -3.75089100,-0.74269600,3.33829900  
C -2.54479100,-1.44084700,3.29870200  
C -1.60546900,-1.17342100,2.30036100  
H 1.38770100,2.87820100,-1.70366000  
H 1.60075800,1.60239100,-3.04187100  
H -0.73874100,2.17276100,-3.88286000  
H -0.92820600,3.38325000,-2.55772200  
H 0.17904900,-2.69596300,-1.61171100  
H -0.50197800,-2.76359300,0.02747000  
H -1.24634600,-0.30679400,-3.16909400  
H 0.41421100,-0.44931200,-2.58807600  
H 0.71475300,-0.44329400,1.66278100  
H 1.25679100,0.64533900,0.37958800  
H 3.83556300,-0.81790600,2.33514500  
H 5.83442600,0.64582700,2.08755100  
H 5.88665100,-0.14770200,-2.13647600

H 3.89186900,-1.60491000,-1.88864500  
H 7.40001700,1.84006300,0.68943000  
H 8.12825500,0.59983100,-0.33936000  
H 7.15255100,1.87792200,-1.06573700  
H -3.20232800,0.46677200,-2.02216600  
H -5.51429400,-0.24761700,-2.42122200  
H -6.21355700,-2.58852800,-1.91979000  
H -4.53495000,-4.18921200,-1.01134000  
H -2.23662200,-3.48452500,-0.60825800  
H -3.30312000,1.22111900,0.60499500  
H -4.94989000,0.76837700,2.37206600  
H -4.47877400,-0.94568000,4.11932100  
H -2.32460200,-2.19718000,4.04741800  
H -0.67976000,-1.74074900,2.30578300

#### INT4

Opt @ B3LYP/6-31G(d)/Lanl2dz

SCF Done: E(B3LYP) = -1697.828213a.u.

Zero-point correction = 0.482235Hartree/Particle

Sum of electronic and thermal Free Energies = -1697.413488a.u.

-----  
C -0.98459400,0.08648000, 0.24910000  
C -0.37077800,0.91498900,-1.94894600  
C 1.54438600,1.23013000,-3.52336000  
C 0.20672500,1.73516300,-3.07236700  
C -0.52926500,-2.25796200,-0.40612000  
C -1.38572800,-1.05843000,-0.85458100  
C -0.83469800,-0.49640500,-2.20852900  
C -0.48102000,1.20726900,-0.65036000  
C 0.24299900,-0.54199200, 0.98496400  
I 0.30197500,3.02478200, 0.20932900  
N 0.70098300,-1.59557300, 0.06045600  
C 3.36749900,-1.58397000, 0.45561400  
C 3.96891000,-1.03915100, 1.58811700  
C 5.10453500,-0.24079900, 1.43520800  
C 5.64514200,0.01542100, 0.16997300  
C 5.02341800,-0.55758900,-0.95335500  
C 3.89188100,-1.35514500,-0.82090000  
C 6.86655300,0.88797500, 0.00419200  
S 1.92425200,-2.62740700, 0.63342900  
O 1.99785900,-3.72507300,-0.33672300  
O 1.74436500,-2.91103800, 2.06589900  
C -2.87607500,-1.36905200,-0.97927900

C -3.74455900,-0.39427200,-1.50231000  
C -5.10377700,-0.64581000,-1.67047500  
C -5.63594400,-1.89112800,-1.32800400  
C -4.79002600,-2.87286200,-0.81776000  
C -3.42712100,-2.61335200,-0.64399900  
C -2.11982400,0.46520900, 1.20309600  
C -2.89476400,1.61424800, 0.98697400  
C -3.95854200,1.94317000, 1.82744100  
C -4.28441100,1.12045100, 2.90509600  
C -3.53972800,-0.03857400, 3.12307000  
C -2.47344000,-0.36055400, 2.28274600  
H 2.27854200,0.90568900,-2.79269900  
H 1.85711000,1.33760100,-4.55672600  
H -0.49348100,1.72564800,-3.92020700  
H 0.28263500,2.78717400,-2.75158900  
H -0.30782200,-2.95752600,-1.21368400  
H -1.00597200,-2.80819200, 0.41691900  
H -1.59170700,-0.53431400,-3.00097000  
H 0.01776600,-1.09192900,-2.56023700  
H -0.03198300,-0.96784200,1.95475200  
H 1.03550500,0.19130600, 1.15016600  
H 3.55800900,-1.24945700,2.56972400  
H 5.57815600, 0.18533400, 2.31585700  
H 5.43890800,-0.38061200,-1.94263300  
H 3.42398200,-1.80819300,-1.68863400  
H 7.30377000, 1.15407400, 0.97114800  
H 7.63843600, 0.38373300,-0.58919500  
H 6.61746500, 1.82068200,-0.51771600  
H -3.35043500, 0.57958000,-1.77785600  
H -5.74804900, 0.13238000,-2.07129900  
H -6.69538900,-2.09212900,-1.46168700  
H -5.18386200,-3.85077900,-0.55358700  
H -2.80204000,-3.40902000,-0.25394600  
H -2.66585900, 2.26592500, 0.15128000  
H -4.53187200, 2.84631000, 1.63529900  
H -5.11061500, 1.37557900, 3.56318700  
H -3.78585700,-0.69969200, 3.94975200  
H -1.92921700,-1.27909000, 2.47719600

## TS4

Opt @ B3LYP/6-31G(d)/Lanl2dz

SCF Done: E(B3LYP) = -2328.254373a.u.

Zero-point correction = 0.582209Hartree/Particle

Sum of electronic and thermal Free Energies = -2327.752394a.u.

Imaginary Frequency is  $-261.84 \text{ cm}^{-1}$

---

C -0.26972300,1.30324900,-0.03445700  
C 0.53015300,-0.77146200, 0.94512600  
C 1.74040000,-1.70738200, 2.97481500  
C 0.73527300,-1.93818300, 1.88001500  
C -0.28644400, 0.31291600,-2.30487800  
C 0.68983700, 0.55562300,-1.13720700  
C 1.05576100,-0.81242600,-0.46734900  
C -0.15556600, 0.35548400, 1.15101400  
C -1.69818000, 1.15771900,-0.64630000  
I -1.29929400, 0.70482900, 2.94523100  
N -1.55521400, 0.04277600,-1.60236300  
C -4.03147900,-1.03406900,-1.49878900  
C -5.14172400,-0.32997400,-1.03487900  
C -6.03921200,-0.96831600,-0.17760900  
C -5.84293900,-2.29729300, 0.21788900  
C -4.72204400,-2.98519600,-0.27657700  
C -3.81636100,-2.36561200,-1.13144800  
C -6.80306600,-2.97717200, 1.16480500  
S -2.88810500,-0.24072400,-2.62364300  
O -2.42270200,-1.21895100,-3.61246300  
O -3.49095300, 1.02840300,-3.06191200  
C 1.95735000, 1.31287200,-1.53457000  
C 3.01289700, 1.42574700,-0.61192500  
C 4.19979500, 2.07786600,-0.93918700  
C 4.36954600, 2.63472300,-2.20896200  
C 3.33785700, 2.52823700,-3.13866100  
C 2.14658100, 1.87733700,-2.80405300  
C 0.11384800, 2.75632600, 0.25449700  
C 0.89844000, 3.08589200, 1.36965700  
C 1.29036000, 4.40076500, 1.62098200  
C 0.91439500, 5.42488600, 0.75243500  
C 0.15292800, 5.11378800,-0.37387900  
C -0.23989900, 3.79746700,-0.61894900  
H 1.76909000,-0.73240500, 3.45574300  
H 1.98440700,-2.55395800, 3.61448700  
H -0.23119700,-2.19046100, 2.35233300  
H 1.02220200,-2.82492300, 1.29978200  
H -0.00544600,-0.53402600,-2.93283300  
H -0.38714200, 1.20386600,-2.93890900  
H 2.13196000,-1.01201900,-0.49933100  
H 0.57023400,-1.64261700,-0.99871400  
H -2.02005200, 2.06910200,-1.15941400

H -2.44387600, 0.91557200, 0.11421300  
H -5.30174000, 0.69405200, -1.35480000  
H -6.90825800, -0.42479300, 0.18425800  
H -4.56311000, -4.02242100, 0.00857600  
H -2.96069600, -2.90479500, -1.52398600  
H -6.38720400, -3.02313900, 2.17994100  
H -7.75567100, -2.44177700, 1.22342700  
H -7.00980300, -4.00720800, 0.85372200  
H 2.91448500, 0.99262500, 0.37845800  
H 4.99234200, 2.14540500, -0.19888700  
H 5.29531900, 3.14094800, -2.46883000  
H 3.45304100, 2.94832600, -4.13445800  
H 1.37532000, 1.80918100, -3.56298200  
H 1.20977200, 2.30551900, 2.05500600  
H 1.89204900, 4.62073700, 2.49891800  
H 1.21550800, 6.45068800, 0.94691000  
H -0.13889800, 5.89569600, -1.06995700  
H -0.81678700, 3.59542200, -1.51551400  
S 4.69063000, -1.48228400, 1.80509100  
H 3.35553200, -1.59086500, 2.29922700  
C 4.54524600, -2.67110700, 0.47031200  
C 4.77558400, -2.25606400, -0.84936700  
C 4.25075200, -4.01893100, 0.72757000  
C 4.71191300, -3.17952600, -1.89562100  
H 4.99417900, -1.21194600, -1.05149700  
C 4.16659100, -4.93122100, -0.32461600  
H 4.10023400, -4.34955800, 1.75116900  
C 4.40124300, -4.51572900, -1.63818700  
H 4.89507100, -2.84821800, -2.91430100  
H 3.93180200, -5.97181800, -0.11593300  
H 4.34459900, -5.23047500, -2.45455800

## INT5

Opt @ B3LYP/6-31G(d)/Lanl2dz

SCF Done: E(B3LYP) = -2328.306384a.u.

Zero-point correction = 0.588822Hartree/Particle

Sum of electronic and thermal Free Energies = -2327.802061a.u.

-----  
C -0.63781700, 1.17434900, -0.36495800  
C -0.09167700, 0.06033500, 1.72721100  
C 1.08550800, 0.11188900, 3.97368500  
C -0.10321900, -0.42139600, 3.15002700  
C 0.15648400, -0.74232600, -1.71545600

C 0.66742800, 0.21865900,-0.62550900  
C 0.84965700,-0.55895000, 0.72168500  
C -0.85650700, 0.97902100, 1.12949600  
C -1.78033500, 0.44017800,-1.13740300  
I -2.52406300, 1.93420000, 2.11120900  
N -1.25437500,-0.92572700,-1.32936100  
C -3.54232800,-2.35815000,-1.31386400  
C -4.79887000,-1.82058000,-1.58743900  
C -5.87884700,-2.17630700,-0.77768700  
C -5.71883100,-3.06026000, 0.29623300  
C -4.44232900,-3.59494800, 0.54019400  
C -3.35456000,-3.25280900,-0.25583200  
C -6.88405000,-3.42689100, 1.18423200  
S -2.15416200,-1.93692200,-2.36090800  
O -1.32078100,-3.12614500,-2.56807500  
O -2.66947800,-1.18367800,-3.51580200  
C 1.95693400, 0.94999000,-0.99582300  
C 2.60486400, 1.74193300,-0.02973400  
C 3.79551000, 2.40778600,-0.31254100  
C 4.38272700, 2.29386200,-1.57574100  
C 3.76180800, 1.50537100,-2.54245700  
C 2.56386000, 0.84290500,-2.25480600  
C -0.45116200, 2.62500500,-0.81884600  
C -0.10332500, 3.63011300, 0.09591200  
C 0.11118200, 4.94590400,-0.31510000  
C -0.00575600, 5.29088400,-1.66114400  
C -0.32859800, 4.30097300,-2.58913000  
C -0.54696600, 2.98724800,-2.17250200  
H 1.05839300, 1.20565200, 4.03236300  
H 1.04563500,-0.28207900, 4.99516100  
H -1.04157700,-0.13395100, 3.63419300  
H -0.06856100,-1.51976400, 3.14603900  
H 0.67949000,-1.70005200,-1.72701400  
H 0.22359000,-0.29113300,-2.71508700  
H 1.88999500,-0.54735300, 1.06538400  
H 0.57694500,-1.61538500, 0.59405600  
H -1.99524500, 0.91207400,-2.10097000  
H -2.70673500, 0.41315400,-0.55950700  
H -4.92412600,-1.14613000,-2.42765400  
H -6.86143500,-1.76178400,-0.98807200  
H -4.30322700,-4.29229600, 1.36282900  
H -2.37349600,-3.67793200,-0.07216900  
H -6.80131200,-2.93761200, 2.16345000  
H -7.83733300,-3.12215000, 0.74181200  
H -6.92333900,-4.50695900, 1.36603700



H 2.16707700, 1.84334300, 0.95859900  
H 4.26427200, 3.01765000, 0.45518600  
H 5.30948200, 2.81495400, -1.80044300  
H 4.20271600, 1.40252300, -3.53077600  
H 2.11928900, 0.23345800, -3.03353200  
H -0.00005200, 3.38532600, 1.14696500  
H 0.36992500, 5.70069900, 0.42291700  
H 0.15712500, 6.31569900, -1.98375600  
H -0.41244100, 4.54669000, -3.64448100  
H -0.78102700, 2.24432100, -2.92810700  
S 4.52425500, -2.11014200, 2.61234500  
H 2.04575500, -0.18514600, 3.53833800  
C 5.54356900, -2.19994800, 1.22211100  
C 5.44401700, -1.24029000, 0.17809500  
C 6.50294500, -3.24198200, 1.09486000  
C 6.26461600, -1.32588600, -0.93858400  
H 4.71849100, -0.43846900, 0.26738300  
C 7.31829900, -3.31832600, -0.02540200  
H 6.58122200, -3.97502900, 1.89139500  
C 7.20184500, -2.36248400, -1.04512000  
H 6.17261400, -0.58622300, -1.72832700  
H 8.04683500, -4.11951500, -0.11326600  
H 7.84118700, -2.42673100, -1.92145300

## TS1'

Opt @ B3LYP/6-31G(d)/Lanl2dz

SCF Done: E(B3LYP) = -1697.74973a.u.

Zero-point correction = 0.479165Hartree/Particle

Sum of electronic and thermal Free Energies = -1697.337742a.u.

Imaginary Frequency is -449.06 cm<sup>-1</sup>

---

C -0.78485600, -0.24125100, 0.00392400  
C -1.23772600, -1.85402100, 1.99906200  
C -1.38660800, -2.99504600, 2.91144000  
C -1.35405700, -1.56774300, 3.44884500  
C 0.04984900, 2.20283900, 0.14539900  
C -0.86082700, 1.49081700, 1.14947100  
C -0.24434000, 1.22009800, 2.39788500  
C -1.05573100, -1.50042100, 0.74415200  
C 0.71657300, -0.12684100, -0.30579300  
I -0.90639800, -3.31113000, -0.62480400  
N 1.15234200, 1.27754600, -0.13422900  
C 3.83716900, 1.03620300, -0.37496700

C 4.40196500,-0.07625200,-0.99716100  
C 5.51399800,-0.68728100,-0.41525700  
C 6.07260800,-0.19727800, 0.77155900  
C 5.48672000, 0.93010000, 1.37166800  
C 4.37669200, 1.55079700, 0.80803300  
C 7.29278200,-0.84409900, 1.38295100  
S 2.41196200, 1.83746200,-1.10718400  
O 2.49183400, 3.28114700,-0.86038400  
O 2.27832300, 1.32060600,-2.47876400  
C -2.28204500, 1.98329800, 1.21886900  
C -3.24082100, 1.29930500, 1.98560600  
C -4.54494100, 1.77355600, 2.10741200  
C -4.92708200, 2.95359400, 1.46563000  
C -3.98877400, 3.64683800, 0.70272000  
C -2.68328600, 3.16708400, 0.57892800  
C -1.72950600, 0.03293900,-1.12324800  
C -3.09317900,-0.29575800,-0.99026800  
C -4.00087500,-0.03898800,-2.01258500  
C -3.57217400, 0.55303200,-3.20347400  
C -2.22475300, 0.87888700,-3.35701600  
C -1.31230100, 0.62285200,-2.33241800  
H -2.33959300,-3.52279200, 2.91769600  
H -0.52156500,-3.63533600, 3.07904200  
H -0.46247100,-1.23495600, 3.97633700  
H -2.27885400,-1.14551100, 3.83859600  
H 0.45817900, 3.12373300, 0.56638100  
H -0.50766000, 2.45841200,-0.76148500  
H -0.82821800, 1.09967000, 3.30069700  
H 0.83098900, 1.08850100, 2.46268700  
H 0.92439000,-0.47788200,-1.32155100  
H 1.28106100,-0.75829600, 0.38631000  
H 3.98099200,-0.44689800,-1.92550500  
H 5.95566800,-1.55634900,-0.89619900  
H 5.91101800, 1.32773600, 2.29056100  
H 3.93732500, 2.43035700, 1.26716100  
H 7.45782600,-1.84882700, 0.98192200  
H 8.19532800,-0.25388000, 1.17697100  
H 7.20086800,-0.92281700, 2.47201900  
H -2.96380700, 0.37207300, 2.47281200  
H -5.26532500, 1.21768200, 2.70216100  
H -5.94339000, 3.32629600, 1.55943100  
H -4.26749300, 4.56890100, 0.19970900  
H -1.97691300, 3.74102000,-0.01076400  
H -3.43801400,-0.76544900,-0.07546900  
H -5.04596300,-0.30629500,-1.88087700

H -4.27990000, 0.75114100,-4.00393100  
H -1.87204300, 1.32790300,-4.28160300  
H -0.26923200, 0.87194000,-2.49894500

**INT2'**

Opt @ B3LYP/6-31G(d)/Lan12dz

SCF Done: E(B3LYP) = -1697.759348a.u.

Zero-point correction = 0.480077Hartree/Particle

Sum of electronic and thermal Free Energies = -1697.346121a.u.

---

C 0.83237000, 0.12088400, 0.07080100  
C 1.43987000, 1.74743900, 2.03877500  
C 1.67823100, 2.87241800, 2.95499200  
C 1.61882200, 1.44058400, 3.47662100  
C -0.10739700,-2.12613300, 0.12805900  
C 0.87119600,-1.26014200, 0.97299700  
C 0.25224800,-1.07899900, 2.32523700  
C 1.17841300, 1.42348300, 0.78728500  
C -0.69040200, 0.19490100,-0.28213300  
I 1.00916400, 3.19682400,-0.53878000  
N -1.19273000,-1.18591100,-0.17255300  
C -3.87937700,-0.92774800,-0.37215600  
C -4.44977300, 0.21236500,-0.93641900  
C -5.55527800, 0.79644400,-0.31554500  
C -6.10185400, 0.25288300, 0.85338500  
C -5.51028100,-0.90071200, 1.39519500  
C -4.40664200,-1.49516000, 0.79207900  
C -7.31520500, 0.87116300, 1.50657300  
S -2.45924900,-1.69260200,-1.15254600  
O -2.53505700,-3.14618200,-0.97218500  
O -2.33924300,-1.10839200,-2.49787700  
C 2.24362600,-1.92801900, 1.12384400  
C 3.29673500,-1.26399300, 1.77356700  
C 4.53002700,-1.88007400, 1.98008500  
C 4.74315800,-3.19039300, 1.54860900  
C 3.70697100,-3.86948600, 0.91117700  
C 2.47377500,-3.24619500, 0.70311700  
C 1.71667300,-0.07167500,-1.17722400  
C 3.08209000, 0.25131400,-1.12289300  
C 3.91614200, 0.06003400,-2.22189000  
C 3.40402000,-0.46188700,-3.41111600  
C 2.04986400,-0.78156300,-3.48464800  
C 1.21379500,-0.58695600,-2.38174700  
H 2.64919900, 3.36528800, 2.91818300

H 0.84741100, 3.54205500, 3.17371600  
H 0.74173100, 1.13154900, 4.04114600  
H 2.54250700, 0.97190200, 3.81167400  
H -0.48926300,-2.97828600, 0.69230300  
H 0.38115500,-2.49456000,-0.78066900  
H 0.81092600,-1.30395200, 3.22432500  
H -0.79695400,-0.81629600, 2.41366200  
H -0.84769000, 0.61138000,-1.27901000  
H -1.21299600, 0.83206200, 0.43843300  
H -4.03811700, 0.62469300,-1.85126900  
H -6.00161300, 1.68655500,-0.75170400  
H -5.92491600,-1.33977300, 2.29954900  
H -3.96264300,-2.39437600, 1.20651500  
H -7.48651000, 1.89164400, 1.15039900  
H -8.21959300, 0.28862700, 1.28723600  
H -7.20983200, 0.90414600, 2.59680000  
H 3.15338500,-0.24483000, 2.10902500  
H 5.32581400,-1.33304100, 2.47943600  
H 5.70262100,-3.67440600, 1.70937500  
H 3.85053900,-4.89188700, 0.57181200  
H 1.69205900,-3.81461100, 0.21199600  
H 3.49583300, 0.67267100,-0.21355300  
H 4.96753500, 0.32523800,-2.14839000  
H 4.05218800,-0.61040200,-4.27065400  
H 1.62895600,-1.17912200,-4.40421600  
H 0.16313800,-0.83302500,-2.49142400

## 11. X-Ray structures

### Compound 3ga

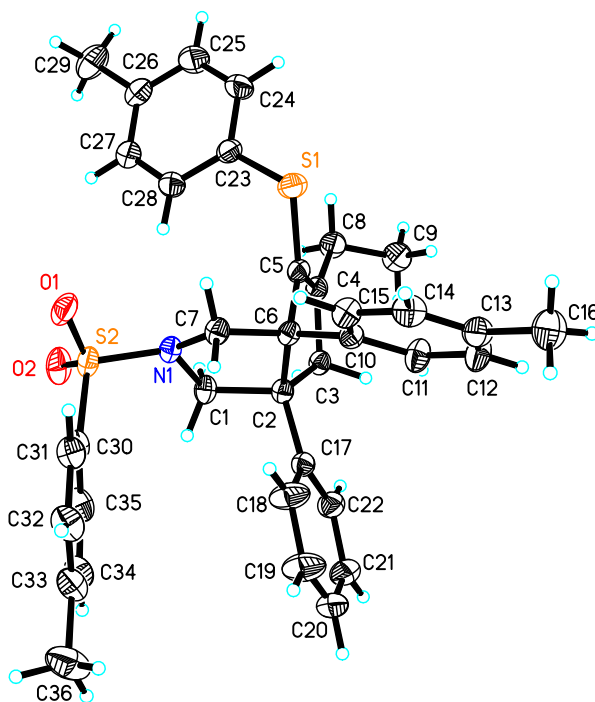

The crystal data of **3ga** have been deposited in CCDC with number 2244043. Empirical Formula:  $C_{36}H_{37}NO_2S_2$ ; Formula Weight: 579.78; Crystal Color, Habit: colorless, Crystal Dimensions: 0.160 x 0.130 x 0.080 mm<sup>3</sup>; Crystal System: Triclinic; Lattice Parameters:  $a = 9.2165(12)$  Å,  $b = 12.9551(18)$  Å,  $c = 14.964(2)$  Å,  $\alpha = 65.519(4)^\circ$ ,  $\beta = 84.823(4)^\circ$ ,  $\gamma = 71.049(4)^\circ$ ,  $V = 1535.9(4)$  Å<sup>3</sup>; Space group:  $P -1$ ;  $Z = 2$ ;  $D_{calc} = 1.254$  g/cm<sup>3</sup>;  $F_{000} = 616$ ; Final R indices [ $I > 2\sigma(I)$ ]  $R1 = 0.0519$ ,  $wR2 = 0.1300$ .

## Compound 7

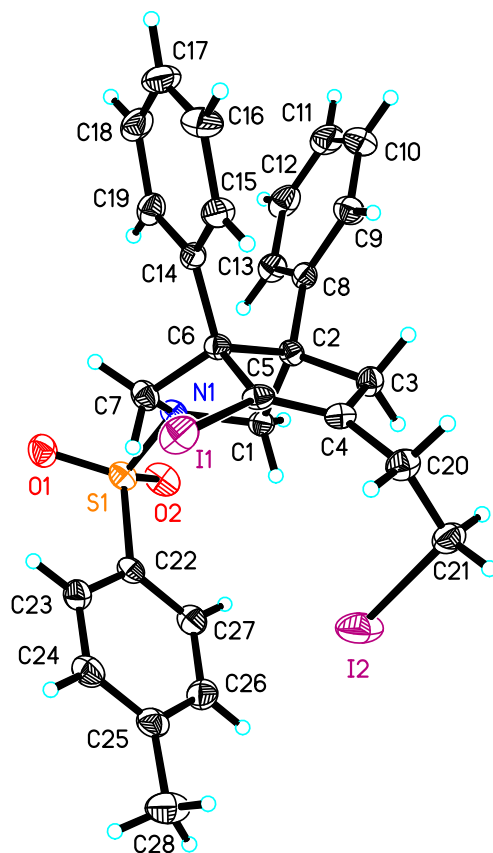

The crystal data of **7** have been deposited in CCDC with number 2073868. Empirical Formula:  $C_{28}H_{27}I_2NO_2S$ ; Formula Weight: 695.36; Crystal Color, Habit: colorless; Crystal Dimensions: 0.200 x 0.110 x 0.080 mm<sup>3</sup>; Crystal System: Monoclinic; Lattice Parameters:  $a = 13.1688(3) \text{ \AA}$ ,  $\alpha = 90 \text{ deg}$ .  $b = 18.3576(4) \text{ \AA}$ ,  $\beta = 107.0810(10) \text{ deg}$ .  $c = 11.5032(3) \text{ \AA}$ ,  $\gamma = 90 \text{ deg}$ ;  $V = 2658.21(11) \text{ \AA}^3$ ; Space group: P 21/c;  $Z = 4$ ;  $D_{calc} = 1.738 \text{ g/cm}^3$ ;  $F_{000} = 1360$ ; Diffractometer: Rigaku AFC7R; Residuals:  $R$ ;  $R_w$ : 0.0331, 0.0714.

## 12. References

- [1] K. H. Rui, S. Yang, Y. Wei, M. Shi, *Org. Chem. Front.*, **2019**, *6*, 2506-2513.
- [2] B. M. Trost, C. A. Kalnmals, *Chem. Eur. J.*, **2018**, *24*, 9066-9074.
- [3] A. Angeli, D. Tanini, A. Nocentini, A. Capperucci, M. Ferraroni, P. Gratteri, C. T. Supuran, *Chem. Commun.*, **2019**, *55*, 648-651.
- [4] W. G. Zhang, Z. L. Zou, Y. H. Wang, Y. Wang, Y. Liang, Z. G. Wu, Y. X. Zheng, Y. Pan, *Angew. Chem. Int. Ed.*, **2019**, *58*, 624-627.
- [5] J. X. Liu, Y. Wei, M. Shi, *Org. Chem. Front.*, **2021**, *8*, 94-100.
- [6] X. Y. Zhang, X. Y. Wu, B. Zhang, Y. Wei, M. Shi, *ACS Catal.*, **2021**, *8*, 4372-4380
- [7] Y. Luo, Q. Wei, L. K. Yang, Y. Q. Zhou, W. D. Cao, Z. S. Su, X. H. Liu, X. M. Feng, *ACS Catal.*, **2022**, *20*, 12984-12992.
- [8] Z. Meng, X. Y. Zhang, M. Shi, *Org. Chem. Front.*, **2021**, *8*, 3796-3801.
